# Supplementary material for: Gene duplication and neofunctionalization: POLR3G and POLR3GL
Source: HighWire-hosted journal article supplement (doi:10.1101/gr.161570.113), 2013-10-09
Supplement: TableS1.xlsx [file TableS1.xlsx]

## Sheet: Feuil1
Homo sapiens					Mus musculus				Saccharomyces cerevisiae				% aa identities between H. sapiens and S. cerevisiae
Gene name	Protein name	Protein name Uniprot	Alternative protein names	size (aa)	Gene name	Protein name	Protein name Uniprot	size (aa)	Gene name	Protein name Uniprot	Alternative protein names	size (aa)
POLR3A	POLR3A	HsRPC1	C1, C160	1390	Polr3a	POLR3A	MmRPC1	1390	RPO31	ScRPC1	C160	1460	50
POLR3B	POLR3B	HsRPC2	C2, C128	1133	Polr3b	POLR3B	MmRPC2	1133	RET1	ScRPC2	C128	1149	63
POLR3C	POLR3C	HsRPC3	C3, C62	534	Polr3c	POLR3C	MmRPC3	533	RPC82	ScRPC3	C82, C74	654	22
POLR3D	POLR3D	HsRPC4	C4, BN51	398	Polr3d	POLR3D	MmRPC4	398	RPC53	ScRPC4	C53	422	28
POLR3E	POLR3E	HsRPC5	C5	708	Polr3e	POLR3E	MmRPC5	710	RPC37	ScRPC5	C37, C5	282	26
POLR3F	POLR3F	HsRPC6	C6, RPC39	316	Polr3f	POLR3F	MmRPC6	316	RPC34	ScRPC6	C34	217	26
POLR3G	POLR3G	HsRPC7	C7, RPC32	223	Polr3g	POLR3G	MmRPC7	223	RPC31	ScRPC7	C31	251	35
POLR3GL	POLR3GL	HsRPC7-Like	C7-Like	218	Polr3gl	POLR3GL	MmRPC7-Like	218	-	-	-	-	-
POLR3H	POLR3H	HsRPC8	C8, RPC22.9	204	Polr3h	POLR3H	MmRPC8	204	RPC25	ScRPC8	C8, C25	212	42
CRCP	CRCP	HsRPC9	C9, RPC17, CGRP-RCP	148	Crcp	CRCP	MmRPC9	148	RPC17	ScRPC9	C17	161	30
POLR3K	POLR3K	HsRPC10	C11, C10, RPC11, RPC12.5	108	Polr3k	POLR3K	MmRPC10	108	RPC11	ScRPC10	C11	110	52
POLR1C	POLR1C	HsRPAC1	RPA39, RPC40	346	Polr1c	POLR1C	MmRPAC1	346	RPC40	ScRPAC1	C37, C40	335	47
POLR1D	POLR1D	HsRPAC2	AC19, RPA16, RPC16, RPA19	133	Polr1d	POLR1D	MmRPAC2	133	RPC19	ScRPAC2	AC19		45
POLR2E	POLR2E	HsRPABC1	ABC1, XAP4	210	Polr2e	POLR2E	MmRPABC1	210	RPB5	ScRPABC1	ABC27	215	42
POLR2F	POLR2F	HsRPABC2	ABC2, RPABC14.4, RPC15	127	Polr2f	POLR2F	MmRPABC2	127	RPO26	ScRPABC2	ABC23	155	72
POLR2H	POLR2H	HsRPABC3	ABC3, RPB17, RPB8	150	Polr2h	POLR2H	MmRPABC3	150	RPB8	ScRPABC3	ABC14.5, ABC14.4	146	35
POLR2K	POLR2K	HsRPABC4	ABC4, RPB7, ABC10-alpha	58	Polr2k	POLR2K	MmRPABC4	58	RPC10	ScRPABC4	ABC4, ABC10-alpha	70	52
POLR2L	POLR2L	HsRPABC5	ABC5, RPB7.6	67	Polr2l	POLR2L	MmRPABC5	67	RPB10	ScRPABC5	ABC5, ABC10-beta, ABC8	70	73
Figure S1. RNA polymerase III subunit nomenclature in Homo sapiens, Mus musculus, and Saccharomyces cerevisiae. The amino acid (aa) length of each protein is indicated in columns E, I, and M.
