# Supplementary material for: Gene duplication and neofunctionalization: POLR3G and POLR3GL
Source: HighWire-hosted journal article supplement (doi:10.1101/gr.161570.113), 2013-10-09
Supplement: TableS2.xlsx [file TableS2.xlsx]

## Sheet: All
					Scores: log2((IP tag counts +30)/(Input tag counts+30))
Number	Locus position with link (NCBI36/hg18)	Locus annotation	HUGO nomenclature	In Canella et al. 2010?	POLR3D (cut off = 0.585)	POLR3D % score from tags with multiple matches	POLR3D score Below (B) or Above (A) cutoff (0.585)	POLR3G (cut off = 0.519)	POLR3G score Below (B) or Above (A) cutoff (0.519)	POLR3GL (cut off = 0.553)	POLR3GL score Below (B) or Above (A) cutoff (0.553)	BDP1	BDP1 score Below (B) or Above (A) cutoff (0.647)
1	chr1:108297648-108298018	chr1_125_Pseudo_???-		yes	0.209453	0	B	-0.0458037	B	0.0443941	B	0	B
2	chr1:142454931-142455304	chr1_124_Pseudo_GTT-	TRNAN34P	yes	0.222392	17.64	B	0	B	0.0473057	B	0.201634	B
3	chr1:142481401-142481774	chr1_10_tRNAAsn_GTT+		yes	-0.0430687	100	B	-0.0874628	B	0.121991	B	-0.0085115	B
4	chr1:143012818-143013191	chr1_11_tRNAAsn_GTT+		yes	0.571157	100	B	-0.175087	B	-0.0418202	B	-0.0995357	B
5	chr1:143019821-143020194	chr1_123_tRNAAsn_GTT-		yes	-0.040642	100	B	-0.125531	B	0.152003	B	0.0511787	B
6	chr1:143193047-143193420	chr1_12_tRNAAsn_GTT+		yes	0.263034	100	B	-0.175087	B	0	B	-0.0995357	B
7	chr1:143200050-143200423	chr1_122_tRNAAsn_GTT-		yes	-0.040642	100	B	-0.125531	B	0.115477	B	-0.0489096	B
8	chr1:143550643-143551014	chr1_121_tRNAGln_CTG-		yes	1.08964	90.82	A	-0.0374747	B	0.387023	B	0.00921853	B
9	chr1:144090527-144090898	chr1_120_tRNAGln_CTG-		yes	1.17688	81.05	A	-0.275634	B	0	B	-0.122683	B
10	chr1:144096936-144097311	chr1_13_tRNAAsn_GTT+		yes	0.247928	0	B	0.0874628	B	0.0874628	B	0.209453	B
11	chr1:144106729-144107101	chr1_119_tRNALys_CTT-	TRNAK20	yes	3.81378	1.17	A	1.20945	A	1.08746	A	1.52826	A
12	chr1:144108088-144108459	chr1_118_tRNAHis_GTG-	TRNAH4	yes	3.73306	1.59	A	1.09433	A	0.721284	A	1.39541	A
13	chr1:144109071-144109442	chr1_117_tRNAGly_TCC-	TRNAG7	yes	3.46975	0	A	0.658963	A	0.533432	B	0.347019	B
14	chr1:144110440-144110811	chr1_116_tRNAGlu_CTC-	TRNAE5	yes	3.53051	0.81	A	0.95109	A	0.508147	B	1.31757	A
15	chr1:144652786-144653156	chr1_14_Pseudo_CCT+	TRNAR30P	yes	0	100	B	0	B	0	B	-0.0443941	B
16	chr1:144674511-144674882	chr1_15_tRNAGln_CTG+		yes	3.5325	100	A	0.836501	A	0.561879	A	0.584963	B
17	chr1:144690241-144690614	chr1_115_tRNAAsn_GTT-		yes	3.17991	100	A	0.61471	A	0.285402	B	0.785725	A
18	chr1:144943234-144943605	chr1_114_tRNAGln_CTG-		yes	0.703607	84.58	A	0.156119	B	0.156119	B	0.165338	B
19	chr1:145011247-145011618	chr1_16_tRNAHis_GTG+	TRNAH7	yes	1.70044	0	A	0.247928	B	0.247928	B	0.369234	B
20	chr1:145016652-145017023	chr1_17_Pseudo_TTC+	TRNAE29P	yes	0	0	B	0.215729	B	0.175087	B	0.331206	B
21	chr1:145949765-145950135	chr1_18_Pseudo_CCT+	TRNAR31P	yes	0	100	B	0	B	0	B	-0.0443941	B
22	chr1:145971512-145971883	chr1_19_tRNAGln_CTG+		yes	3.5325	100	A	0.836501	A	0.561879	A	0.584963	B
23	chr1:145987241-145987614	chr1_113_tRNAAsn_GTT-		yes	3.17991	100	A	0.61471	A	0.285402	B	0.785725	A
24	chr1:146185503-146185876	chr1_20_tRNAAsn_ATT+	TRNAN26	yes	0.156119	0	B	0.0801703	B	0.296982	B	0.156119	B
25	chr1:146203856-146204227	chr1_112_tRNAGln_CTG-		yes	2.84435	2.06	A	0.381871	B	0.0430687	B	0.381871	B
26	chr1:146219155-146219547	OTHER	OTHER	yes	2.79481	0.92	A	0.381871	B	0.125531	B	0.525461	B
27	chr1:146219945-146220316	chr1_21_tRNAHis_GTG+	TRNAH9	yes	3.71973	100	A	1.15381	A	0.906891	A	0.707819	A
28	chr1:146241319-146241690	chr1_111_tRNAHis_GTG-	TRNAH10	yes	3.66025	100	A	1.08342	A	0.85561	A	0.63743	B
29	chr1:146242075-146242467	OTHER2|(RP3TR2)	OTHER2	yes	3.60543	0.23	A	1.08017	A	0.598637	A	0.716207	A
30	chr1:146247504-146247875	chr1_110_Pseudo_TTC-	TRNAE30P	yes	2.15528	0	A	0.203533	B	0.277534	B	0.0430687	B
31	chr1:146267411-146267782	chr1_22_tRNAGln_CTG+		yes	-0.165059	0	B	-0.0801703	B	0	B	-0.302563	B
32	chr1:146292163-146292534	chr1_23_Pseudo_CTG+		yes	2.40088	0	A	0.247928	B	0.285402	B	0.129283	B
33	chr1:146317534-146317907	chr1_109_Pseudo_GTT-	TRNAN35P	yes	0.0458037	42.85	B	-0.0473057	B	0	B	0.154328	B
34	chr1:146344011-146344384	chr1_24_tRNAAsn_GTT+		yes	-0.0430687	100	B	-0.0874628	B	0.121991	B	-0.0085115	B
35	chr1:146467279-146467652	chr1_25_tRNAAsn_GTT+		yes	3.77166	20.88	A	0.559427	A	0.452512	B	1.01886	A
36	chr1:146614589-146614962	chr1_26_tRNAAsn_GTT+		yes	3.82732	23.25	A	0.982298	A	0.642448	A	1.38391	A
37	chr1:146864788-146865161	chr1_108_tRNAAsn_GTT-		yes	3.42626	68.22	A	0.540568	A	0.517848	B	0.977974	A
38	chr1:147026830-147027203	chr1_107_tRNAAsn_GTT-		yes	3.20387	97.94	A	0.36257	B	0.490326	B	0.554102	B
39	chr1:147345838-147346209	chr1_27_Pseudo_CTG+		yes	0.040642	9.09	B	0.263034	B	0.0801703	B	-0.222392	B
40	chr1:147422302-147422673	chr1_106_tRNAHis_GTG-	TRNAH11	yes	0.0901978	0	B	0.293731	B	0.133267	B	-0.0473057	B
41	chr1:147428102-147428473	chr1_105_Pseudo_TTC-	TRNAE32P	yes	0.0901978	0	B	0.0901978	B	0.175087	B	0.175087	B
42	chr1:147452599-147452970	chr1_28_tRNAGln_CTG+		yes	2.22497	3.36	A	-0.0365259	B	-0.234465	B	-0.0365259	B
43	chr1:147478422-147478795	chr1_104_Pseudo_GTT-	TRNAN36P	yes	-0.0848889	0	B	-0.0848889	B	-0.0418202	B	-0.129283	B
44	chr1:147497044-147497417	chr1_103_tRNAAsn_GTT-		yes	1.80735	0	A	-0.277534	B	-0.0365259	B	-0.234465	B
45	chr1:147545259-147545631	chr1_102_Pseudo_TTC-	TRNAE34P	yes	0.394279	38.18	B	0.330149	B	0.192645	B	0.174498	B
46	chr1:147550977-147551350	chr1_101_tRNAAsn_GTT-		yes	0.449803	45.88	B	0.197037	B	-0.0721498	B	0.328949	B
47	chr1:147553833-147554204	chr1_100_Pseudo_GAA-	TRNAF16P	yes	1.92246	38.85	A	0.217591	B	0	B	0.0655883	B
48	chr1:147561140-147561510	chr1_99_tRNAVal_CAC-	TRNAV16	yes	3.6466	39.06	A	0.874469	A	0.797507	A	0.705715	A
49	chr1:147565029-147565401	chr1_98_tRNAVal_CAC-	TRNAV22	yes	3.51758	20.89	A	0.965235	A	0.652077	A	0.856965	A
50	chr1:147592746-147593119	chr1_97_tRNAAsn_GTT-		yes	2.34981	38.67	A	0.397335	B	-0.0721498	B	0.134301	B
51	chr1:147600746-147601114	chr1_29_tRNAGlu_CTC+	TRNAE13	yes	0	36	B	0.112475	B	0.0759489	B	-0.302563	B
52	chr1:147609555-147609925	chr1_96_Pseudo_CCT-	TRNAR32P	yes	-0.0430687	38.46	B	0.0824622	B	0.0824622	B	0	B
53	chr1:147875083-147875456	chr1_30_tRNAAsn_GTT+		yes	-0.165059	100	B	-0.165059	B	0.112475	B	0.0498191	B
54	chr1:147882091-147882464	chr1_95_tRNAAsn_GTT-		yes	0.543142	100	B	-0.175087	B	-0.0418202	B	-0.0418202	B
55	chr1:147930829-147931201	chr1_94_tRNAGlu_TTC-	TRNAE3	yes	0.148099	56.75	B	0.345135	B	0.0759489	B	0.0943274	B
56	chr1:147936531-147936904	chr1_93_tRNAAsn_GTT-		yes	0.556393	58.2	B	-0.0430687	B	0	B	0.0622843	B
57	chr1:147939379-147939750	chr1_92_Pseudo_GAA-	TRNAF17P	yes	2.08989	43.44	A	0.296982	B	0.394279	B	0.36257	B
58	chr1:147946684-147947054	chr1_91_Pseudo_CCC-	TRNAG34P	yes	3.61798	47	A	1.27302	A	1.03953	A	1.1247	A
59	chr1:147950562-147950935	chr1_90_tRNAVal_CAC-	TRNAV25	yes	3.17812	29.85	A	0.802061	A	0.29956	B	1.07215	A
60	chr1:147978272-147978645	chr1_89_tRNAAsn_GTT-		yes	3.19265	23.97	A	0.598637	A	0.394279	B	0.652077	A
61	chr1:147986276-147986644	chr1_31_tRNAGlu_TTC+	TRNAE8	yes	0.040642	42.85	B	0.0801703	B	0.156119	B	0.040642	B
62	chr1:147994745-147995115	chr1_88_Pseudo_CCT-	TRNAR33P	yes	-0.0703893	14.28	B	-0.392317	B	-0.14439	B	-0.0703893	B
63	chr1:148283856-148284226	chr1_87_tRNAAla_AGC-	TRNAA16	yes	-0.0848889	0	B	-0.129283	B	-0.222392	B	0.156119	B
64	chr1:151910200-151910571	chr1_32_tRNAMet_CAT+	TRNAM3	yes	3.77259	0	A	0.943416	A	0.736966	A	1.01609	A
65	chr1:157377875-157378248	chr1_86_tRNAArg_TCT-	TRNAR16	yes	2.75489	0	A	-0.174029	B	-0.174029	B	0.471306	B
66	chr1:159161961-159162535	MER50_LTR_ERV1	tRNA-Glu-GAA_tRNA_tRNA	yes	1.37197	0	A	0.160465	B	0.371969	B	0.270089	B
67	chr1:159635964-159636336	chr1_85_tRNAVal_CAC-	TRNAV29	yes	3.56635	0.56	A	1.07215	A	0.645335	A	0.957091	A
68	chr1:159657135-159657507	chr1_33_Pseudo_???+		yes	0.118644	4.1	B	-0.0418202	B	0	B	-0.222392	B
69	chr1:159658357-159658728	chr1_84_tRNAGlu_TTC-	TRNAE12	yes	3.78773	3.18	A	0.744743	A	0.648528	A	1.22236	A
70	chr1:159664341-159664714	chr1_83_tRNAAsn_GTT-		yes	3.45085	0.51	A	0.885829	A	0.204358	B	0.5281	B
71	chr1:159676435-159676806	chr1_82_tRNAGly_TCC-	TRNAG8	yes	3.00514	1.6	A	0.263034	B	0.296982	B	0.449656	B
72	chr1:159677089-159677460	chr1_81_tRNAAsp_GTC-	TRNAD1	yes	2.87447	66.31	A	0.222392	B	0.481127	B	0.909428	A
73	chr1:159677797-159678179	chr1_34_tRNALeu_CAG+	TRNAL5	yes	2.26894	99.3	A	-0.149378	B	0.0692627	B	0.52738	B
74	chr1:159679568-159679938	chr1_35_tRNAGly_GCC+	TRNAG15	yes	2.22551	100	A	-0.419903	B	0.0985638	B	0.230376	B
75	chr1:159683492-159683856	chr1_80_tRNAGlu_CTC-	TRNAE14	yes	3.06269	100	A	0.546488	A	0.68281	A	1.11936	A
76	chr1:159683856-159684220	chr1_79_tRNAGly_TCC-	TRNAG9	yes	2.73853	100	A	0.334419	B	0.542527	B	1.08574	A
77	chr1:159684507-159684878	chr1_78_tRNAAsp_GTC-	TRNAD4	yes	2.74723	100	A	0	B	0.270648	B	0.732265	A
78	chr1:159685215-159685597	chr1_36_tRNALeu_CAG+	TRNAL6	yes	2.56986	100	A	-0.0931094	B	0.129283	B	0.757155	A
79	chr1:159686941-159687311	chr1_37_tRNAGly_GCC+	TRNAG21	yes	2.02594	100	A	-0.614346	B	-0.172837	B	0.0246961	B
80	chr1:159690872-159691236	chr1_77_tRNAGlu_CTC-	TRNAE18	yes	2.78222	100	A	0.325095	B	0.446402	B	1.11507	A
81	chr1:159691237-159691601	chr1_76_tRNAGly_TCC-	TRNAG11	yes	2.62963	100	A	0.154723	B	0.481533	B	1.21029	A
82	chr1:159691888-159692259	chr1_75_tRNAAsp_GTC-	TRNAD5	yes	2.74723	100	A	0	B	0.270648	B	0.732265	A
83	chr1:159692596-159692978	chr1_38_tRNALeu_CAG+	TRNAL14	yes	2.65743	93.05	A	0.0515303	B	0.263034	B	0.81736	A
84	chr1:159694372-159694742	chr1_39_tRNAGly_GCC+	TRNAG23	yes	2.22551	100	A	-0.419903	B	0.0985638	B	0.230376	B
85	chr1:159698283-159698647	chr1_74_tRNAGlu_CTC-	TRNAE21	yes	3.06269	100	A	0.546488	A	0.68281	A	1.11936	A
86	chr1:159698647-159699011	chr1_73_tRNAGly_TCC-	TRNAG13	yes	2.73853	100	A	0.334419	B	0.542527	B	1.08574	A
87	chr1:159699298-159699669	chr1_72_tRNAAsp_GTC-	TRNAD6	yes	2.74723	100	A	0	B	0.270648	B	0.732265	A
88	chr1:159700006-159700388	chr1_40_tRNALeu_CAG+	TRNAL30	yes	2.56986	100	A	-0.0931094	B	0.129283	B	0.757155	A
89	chr1:159701732-159702102	chr1_41_tRNAGly_GCC+	TRNAG25	yes	2.02594	100	A	-0.614346	B	-0.172837	B	0.0246961	B
90	chr1:159705663-159706027	chr1_71_tRNAGlu_CTC-	TRNAE22	yes	2.78222	100	A	0.325095	B	0.446402	B	1.11507	A
91	chr1:159706028-159706392	chr1_70_tRNAGly_TCC-	TRNAG17	yes	2.62963	100	A	0.154723	B	0.481533	B	1.21029	A
92	chr1:159706679-159707050	chr1_69_tRNAAsp_GTC-	TRNAD11	yes	2.70589	100	A	0	B	0.278716	B	0.667813	A
93	chr1:159707387-159707769	chr1_42_tRNALeu_CAG+	TRNAL35	yes	2.56986	100	A	-0.0931094	B	0.129283	B	0.757155	A
94	chr1:159716830-159717200	chr1_43_tRNAGly_GCC+	TRNAG30	yes	0.0801703	0	B	0.228269	B	-0.222392	B	-0.0848889	B
95	chr1:159759409-159759780	chr1_44_Pseudo_GTC+	TRNAD20P	yes	0.255257	4.34	B	0.215729	B	0.0901978	B	0.255257	B
96	chr1:159760111-159760481	chr1_68_tRNAGly_GCC-	TRNAG31	yes	3.73132	0.38	A	0.97728	A	0.78136	A	1.34739	A
97	chr1:159766606-159766988	chr1_67_tRNALeu_CAG-	TRNAL38	yes	3.63777	19.97	A	0.980891	A	1.03747	A	0.791427	A
98	chr1:159767377-159767748	chr1_45_tRNAGly_TCC+	TRNAG24	yes	3.86224	5.04	A	1.08017	A	0.728698	A	0.986194	A
99	chr1:159768389-159768760	chr1_46_tRNAAsp_GTC+	TRNAD13	yes	2.1836	0	A	0.118644	B	-0.0418202	B	0	B
100	chr1:159776505-159776878	chr1_47_tRNAAsn_GTT+		yes	4.09011	3.03	A	1.30378	A	1.06609	A	1.21917	A
101	chr1:159841062-159841433	chr1_48_tRNAAsp_GTC+	TRNAD18	yes	-0.0473057	100	B	-0.0473057	B	0	B	-0.0473057	B
102	chr1:159848210-159848593	chr1_66_tRNALeu_CAA-	TRNAL3	yes	1.95561	77.57	A	-0.0901978	B	0.0848889	B	0.656046	B
103	chr1:159848982-159849353	chr1_49_tRNAGlu_TTC+	TRNAE16	yes	0.928447	100	A	0.0458037	B	0.0458037	B	-0.0473057	B
104	chr1:159857939-159858312	chr1_50_tRNAAsn_GTT+		yes	0.584963	100	B	0	B	0.0473057	B	0.0238467	B
105	chr1:163832624-163832996	chr1_51_Pseudo_CTT+	TRNAK36P	yes	-0.0395284	0	B	-0.121991	B	-0.209453	B	0.148099	B
106	chr1:165950436-165950807	chr1_52_tRNAPro_CGG+	TRNAP11	yes	4.11042	0	A	1.43134	A	0.862496	A	1.73697	A
107	chr1:165951199-165951570	chr1_65_tRNAPro_AGG-	TRNAP4	yes	3.50027	0.61	A	0.90182	A	0.610053	A	1.26974	A
108	chr1:16719517-16719890	chr1_135_tRNAAsn_GTT-		yes	2.77083	1.76	A	0.201634	B	-0.0365259	B	0.432959	B
109	chr1:16731330-16731703	chr1_134_tRNAAsn_GTT-		yes	-0.160465	50	B	0.0374747	B	-0.160465	B	0.0919225	B
110	chr1:16734211-16734582	chr1_133_tRNAGlu_TTC-	TRNAE1	yes	3.80145	41.08	A	0.824913	A	0.728698	A	1.33832	A
111	chr1:16744871-16745241	chr1_132_tRNAGly_CCC-	TRNAG1	yes	3.40939	50.1	A	0.405992	B	0.292782	B	0.485427	B
112	chr1:16746597-16746969	chr1_131_Pseudo_CAC-	TRNAV34P	yes	2.70941	59.57	A	0.112475	B	0.112475	B	0.448758	B
113	chr1:16877203-16877573	chr1_130_tRNAGly_CCC-	TRNAG10	yes	3.52166	0.35	A	0.736966	A	0.277534	B	0.628031	B
114	chr1:16878938-16879310	chr1_129_tRNAVal_CAC-	TRNAV13	yes	0.889817	92.56	A	-0.0430687	B	0.121991	B	0.0622843	B
115	chr1:16924498-16924870	chr1_1_Pseudo_CAC+	TRNAV35P	yes	0.301656	71.79	B	0.0655883	B	-0.140863	B	0.188445	B
116	chr1:16926217-16926587	chr1_2_tRNAGly_CCC+	TRNAG14	yes	2.49476	0	A	0.540568	A	0.510195	B	0.125531	B
117	chr1:170424012-170424380	chr1_64_tRNAGlu_TTC-	TRNAE23	yes	0.0801703	0	B	-0.222392	B	0	B	-0.0418202	B
118	chr1:17053337-17053708	chr1_128_Pseudo_CTG-		yes	0.203533	92.35	B	0.165059	B	0.381871	B	-0.113657	B
119	chr1:17059130-17059502	chr1_3_Pseudo_CAC+	TRNAV36P	yes	2.90935	48.83	A	0.329308	B	0.174029	B	0.304561	B
120	chr1:17060853-17061223	chr1_4_tRNAGly_CCC+	TRNAG28	yes	3.45615	59.12	A	0.432959	B	0.201634	B	0.57289	B
121	chr1:17071515-17071886	chr1_5_tRNAGlu_TTC+	TRNAE2	yes	3.63941	41.12	A	0.597241	A	0.521953	B	1.1822	A
122	chr1:17072151-17072550	HTR044912.1.482(+)|+|chr1:17072000-17072400|17072351|106	HTR044912.1.482	no	2.30066	46.61	A	0.0687128	B	0.573185	A	0.257158	B
123	chr1:17074395-17074768	chr1_6_tRNAAsn_GTT+		yes	0.0347654	25	B	0.16601	B	-0.0356239	B	0.423808	B
124	chr1:17088609-17088982	chr1_7_tRNAAsn_GTT+		yes	3.27171	1.27	A	0.584963	A	0.395929	B	0.479993	B
125	chr1:176944511-176944883	chr1_53_Pseudo_???+		yes	0.040642	0	B	-0.222392	B	-0.222392	B	-0.0848889	B
126	chr1:178450749-178451121	chr1_63_tRNAVal_AAC-	TRNAV30	yes	-0.25634	1.85	B	-0.296982	B	-0.472068	B	-0.407235	B
127	chr1:202742128-202742500	chr1_54_tRNALys_TTT+	TRNAK11	yes	3.67587	0.24	A	1.01749	A	0.619728	A	0.33361	B
128	chr1:202742631-202743003	chr1_62_tRNALys_TTT-	TRNAK16	yes	3.87992	0.73	A	1.20511	A	0.896164	A	1.30039	A
129	chr1:203709744-203710116	chr1_55_tRNALys_TTT+	TRNAK34	yes	0.209453	0	B	0.0443941	B	-0.0458037	B	0	B
130	chr1:205244627-205245003	chr1_61_Pseudo_TGG-	TRNAP23P	yes	0.426265	0	B	0.0874628	B	0.285402	B	0.0874628	B
131	chr1:220704820-220705192	chr1_56_tRNAThr_TGT+	TRNAT19	yes	3.70917	0	A	1.03747	A	0.610053	A	1.14439	A
132	chr1:226812484-226812906	blat|5S_rRNA-related	blat|5S_rRNA-related	yes	2.358	100	A	0.10561	B	0.219781	B	0.381698	B
133	chr1:226814725-226815147	blat|5S_rRNA-related	blat|5S_rRNA-related	yes	2.358	100	A	0.10561	B	0.219781	B	0.381698	B
134	chr1:226816966-226817388	blat|5S_rRNA-related	blat|5S_rRNA-related	yes	2.358	100	A	0.10561	B	0.219781	B	0.381698	B
135	chr1:226819207-226819629	blat|5S_rRNA-related	blat|5S_rRNA-related	yes	2.38785	100	A	0.142604	B	0.256775	B	0.367743	B
136	chr1:226821448-226821870	blat|5S_rRNA-related	blat|5S_rRNA-related	yes	2.358	100	A	0.10561	B	0.219781	B	0.381698	B
137	chr1:226823663-226824085	blat|5S_rRNA-related	blat|5S_rRNA-related	yes	2.38785	100	A	0.142604	B	0.256775	B	0.367743	B
138	chr1:226825884-226826305	RN5S|(5S_rRNA)	RN5S (5S_rRNA)	yes	2.38785	100	A	0.142604	B	0.256775	B	0.366034	B
139	chr1:226828126-226828547	RN5S|(5S_rRNA)	RN5S (5S_rRNA)	yes	2.35443	100	A	0.10561	B	0.219781	B	0.380048	B
140	chr1:226830365-226830786	RN5S|(5S_rRNA)	RN5S (5S_rRNA)	yes	2.45095	91.47	A	0.0901978	B	0.349584	B	0.538054	B
141	chr1:226832607-226833028	RN5S|(5S_rRNA)	RN5S (5S_rRNA)	yes	2.35443	100	A	0.10561	B	0.219781	B	0.380048	B
142	chr1:226834848-226835269	RN5S|(5S_rRNA)	RN5S (5S_rRNA)	yes	2.358	99.67	A	0.122484	B	0.219781	B	0.380048	B
143	chr1:226837088-226837509	RN5S|(5S_rRNA)	RN5S (5S_rRNA)	yes	2.35443	100	A	0.10561	B	0.219781	B	0.380048	B
144	chr1:226839313-226839734	RN5S|(5S_rRNA)	RN5S (5S_rRNA)	yes	2.35443	100	A	0.10561	B	0.219781	B	0.380048	B
145	chr1:226841554-226841975	RN5S|(5S_rRNA)	RN5S (5S_rRNA)	yes	2.37281	100	A	0.123989	B	0.23816	B	0.398426	B
146	chr1:226843785-226844206	RN5S|(5S_rRNA)	RN5S (5S_rRNA)	yes	2.31741	100	A	0.247928	B	0.285402	B	0.369565	B
147	chr1:226846026-226846447	RN5S|(5S_rRNA)	RN5S (5S_rRNA)	yes	2.31741	100	A	0.247928	B	0.285402	B	0.369565	B
148	chr1:226848257-226848678	RN5S|(5S_rRNA)	RN5S (5S_rRNA)	yes	2.35443	100	A	0.10561	B	0.219781	B	0.380048	B
149	chr1:229540087-229540486	NM_175876|EXOC8(-)|+|chr1:229540000-229540400|229540287|41	NM_175876	no	1.69744	0	A	0	B	0.148099	B	-0.121991	B
150	chr1:236172335-236172706	chr1_57_Pseudo_TGG+	TRNAP27P	yes	-0.0430687	0	B	0	B	-0.0874628	B	-0.133267	B
151	chr1:236173429-236173803	chr1_60_Pseudo_TAA-	TRNAL45P	yes	0	0	B	0.0901978	B	-0.0473057	B	0.255257	B
152	chr1:247134527-247134926	chr1_58_tRNALeu_CAA_I+	TRNAL19	yes	4.06995	0	A	1.31451	A	0.904422	A	1.97199	A
153	chr1:247134926-247135291	chr1_59_tRNAGlu_CTC+	TRNAE24	yes	3.99202	0	A	0.843274	A	0.79518	A	1.2854	A
154	chr1:39742632-39743004	chr1_8_Pseudo_CTT+	TRNAK35P	yes	0.270089	22.53	B	0.160465	B	0.0824622	B	0.265054	B
155	chr1:55195980-55196352	chr1_127_tRNALys_CTT-	TRNAK10	yes	0.203533	0	B	0.241008	B	0.0848889	B	0	B
156	chr1:7912776-7913145	chr1_136_Pseudo_???-		yes	0	10.93	B	0.0384741	B	-0.121991	B	-0.253468	B
157	chr1:93754272-93754644	chr1_126_tRNACys_GCA-	TRNAC17	yes	1.02308	0	A	0.293731	B	0.255257	B	0.0547925	B
158	chr1:94085567-94085951	chr1_9_tRNAArg_TCT_I+	TRNAR15	yes	3.24607	0	A	0.964376	A	0.982298	A	1.15024	A
159	chr2:11609128-11609499	chr2_1_Pseudo_CCC+	TRNAG32P	yes	0.247928	0	B	0.285402	B	0.169925	B	0	B
160	chr2:117497737-117498111	chr2_9_Pseudo_TAA+	TRNAL46P	yes	0.0901978	0	B	0.255257	B	0.255257	B	0.215729	B
161	chr2:117498829-117499200	chr2_23_tRNAGln_TTG-	TRNAQ18	yes	0.0874628	0	B	-0.0458037	B	0.0443941	B	0.169925	B
162	chr2:130746231-130746602	chr2_22_Pseudo_TTG-	TRNAQ36P	yes	-0.125531	0	B	0	B	-0.0824622	B	-0.169925	B
163	chr2:130749344-130749713	chr2_21_tRNASer_TGA-	TRNAS8	yes	-0.129283	0	B	-0.0418202	B	-0.0848889	B	-0.0418202	B
164	chr2:130811021-130811392	chr2_20_tRNAGlu_TTC-	TRNAE26	yes	3.70695	0	A	1.38827	A	0.843274	A	1.44392	A
165	chr2:131856462-131856831	chr2_10_Pseudo_TGA+	TRNAS31P	yes	0.0443941	0	B	0.129283	B	0.129283	B	0	B
166	chr2:131859453-131859824	chr2_11_Pseudo_TTG+	TRNAQ39P	yes	-0.0418202	0	B	-0.0848889	B	0.0801703	B	-0.175087	B
167	chr2:150927373-150927745	chr2_12_Pseudo_CTC+	TRNAE38P	yes	0.0443941	39.66	B	0	B	0.0443941	B	0.170791	B
168	chr2:156965377-156965748	chr2_13_tRNAAla_CGC+	TRNAA4	yes	3.85086	0	A	0.979241	A	0.703607	A	0.824913	A
169	chr2:156965755-156966125	chr2_19_tRNAGly_GCC-	TRNAG19	yes	3.60638	0	A	1.03653	A	0.823122	A	0.746351	A
170	chr2:159446267-159446638	chr2_18_Pseudo_CTC-	TRNAE41P	yes	-0.0418202	4.54	B	-0.0418202	B	-0.222392	B	-0.0418202	B
171	chr2:203937226-203937596	chr2_17_Pseudo_TTC-	TRNAE40P	yes	0.165059	4.26	B	0.165059	B	-0.0443941	B	-0.0443941	B
172	chr2:218818644-218819036	chr2_14_tRNATyr_ATA_I+	TRNAY9	yes	0.313158	0	B	-0.0901978	B	0.0430687	B	0.0430687	B
173	chr2:219199226-219199601	chr2_15_Pseudo_CTG+	TRNAQ44P	yes	0.215729	0	B	0.0901978	B	0.331206	B	0.0458037	B
174	chr2:223894409-223894781	chr2_16_Pseudo_TTT-	TRNAK39P	yes	-0.165059	0	B	-0.121991	B	-0.121991	B	-0.0395284	B
175	chr2:27127004-27127392	chr2_2_tRNATyr_GTA_I+	TRNAY4	yes	4.0613	0	A	1.67557	A	1.23947	A	1.58496	A
176	chr2:27127436-27127808	chr2_3_tRNAAla_AGC+	TRNAA3	yes	3.70548	0	A	1.43539	A	0.606658	A	1.15528	A
177	chr2:30130922-30131294	chr2_4_tRNALeu_AAG+	TRNAL9	yes	-0.129283	0	B	0.040642	B	-0.129283	B	0.36257	B
178	chr2:3501532-3501931	NM_018269|ADI1(-)|+|chr2:3501600-3502000|3501732|41	NM_018269	no	2.35755	0	A	0.0874628	B	0.209453	B	0.209453	B
179	chr2:42891030-42891422	chr2_5_tRNAIle_TAT_I+	TRNAI13	yes	4.05528	0	A	1.72792	A	1.39232	A	1.84549	A
180	chr2:45790795-45791167	chr2_28_Pseudo_TTG-	TRNAQ34P	yes	-0.125531	0	B	-0.0824622	B	-0.263034	B	-0.040642	B
181	chr2:47415397-47416516	BC200|chr2:47415697-47416216	BCYRN1	no	1.9386	15.27	A	-0.192645	B	-0.192645	B	-0.0634975	B
182	chr2:70329477-70329847	chr2_27_tRNAGly_CCC-	TRNAG22	yes	3.6329	0.07	A	1.1304	A	0.571906	A	0.801774	A
183	chr2:70517315-70517685	chr2_26_Pseudo_???-		yes	0.156119	0	B	0.156119	B	-0.0418202	B	-0.0418202	B
184	chr2:71126846-71127218	chr2_25_Pseudo_CTC-	TRNAE31P	yes	0.165059	4.34	B	0.125531	B	0.125531	B	0.125531	B
185	chr2:74977404-74977772	chr2_6_tRNAGlu_TTC+	TRNAE10	yes	-0.0759489	0	B	-0.378512	B	-0.0759489	B	-0.378512	B
186	chr2:77748951-77749321	chr2_7_Pseudo_AGG+	TRNAP25P	yes	0	68.42	B	0.040642	B	0.156119	B	-0.0207586	B
187	chr2:87192934-87193305	chr2_8_Pseudo_AGG+	TRNAP28P	yes	-0.203533	84.52	B	0	B	-0.160465	B	-0.0823161	B
188	chr2:95580771-95581142	chr2_24_Pseudo_CTC-	TRNAE36P	yes	-0.148099	10.2	B	0.0347654	B	-0.228269	B	0.22741	B
189	chr3:105362064-105362435	chr3_10_Pseudo_CTC-	TRNAE27P	yes	0	0	B	-0.0874628	B	-0.180572	B	0.121991	B
190	chr3:108103418-108103789	chr3_9_Pseudo_TTG-	TRNAQ42P	yes	-0.0824622	0	B	-0.263034	B	-0.215729	B	-0.263034	B
191	chr3:126895717-126896088	chr3_8_tRNAGlu_CTC-	TRNAE9	yes	0	3.22	B	0.115477	B	-0.040642	B	-0.040642	B
192	chr3:133430484-133430855	chr3_7_tRNACys_GCA-	TRNAC14	yes	2.68353	2.51	A	0.241008	B	0.0430687	B	0.259387	B
193	chr3:133433182-133433553	chr3_6_tRNACys_GCA-	TRNAC18	yes	3.65535	0.14	A	0.703607	A	0.847997	A	1.06054	A
194	chr3:13808737-13809104	chr3_1_Pseudo_CTA+	TRNASUP4P	yes	-0.0824622	0	B	0.0780025	B	-0.263034	B	-0.215729	B
195	chr3:149703768-149704149	chr3_5_tRNALeu_AAG-	TRNAL33	yes	0.0395284	0	B	0	B	-0.215729	B	-0.125531	B
196	chr3:149799103-149799474	chr3_4_tRNAHis_GTG-	TRNAH8	yes	-0.293731	0	B	-0.160465	B	-0.203533	B	-0.293731	B
197	chr3:170972562-170972934	chr3_2_tRNAVal_AAC+	TRNAV24	yes	3.56605	0	A	0.930737	A	0.906891	A	0.626439	B
198	chr3:17716246-17716618	chr3_12_Pseudo_GCA-	TRNAC31P	yes	0.169925	31.78	B	0.0443941	B	0.0443941	B	-0.0289791	B
199	chr3:185848639-185849009	chr3_3_tRNAAsp_GTC-	TRNAD7	yes	0.215729	0	B	0.133267	B	-0.0473057	B	0.133267	B
200	chr3:191624995-191625394	AluSx_SINE_Alu|+|chr3:191625200-191625600|191625195|35	AluSx_SINE_Alu	no	2.32193	0.14	A	0.285402	B	0.357552	B	0.285402	B
201	chr3:197355750-197356450	FLAM_C_SINE_Alu	FLAM_C_SINE_Alu	yes	1.98868	0	A	0.426265	B	0.584963	A	0.321928	B
202	chr3:45705345-45705717	chr3_11_tRNAArg_ACG-	TRNAR11	yes	3.8404	0.49	A	1.49099	A	0.91983	A	1.2824	B
203	chr3:46992817-46993216	NM_144716|CCDC12(-)|+|chr3:46992800-46993200|46993017|50	NM_144716	no	1.58496	0	A	-0.0443941	B	0.381871	B	0.125531	B
204	chr4:124649305-124649676	chr4_3_tRNACys_GCA-	TRNAC16	yes	0.745427	28.97	A	0.160465	B	0.436099	B	0.0433549	B
205	chr4:156603188-156603559	chr4_1_Pseudo_TTG+	TRNAQ54P	yes	-0.0848889	0	B	-0.0848889	B	-0.0418202	B	-0.222392	B
206	chr4:156604278-156604652	chr4_2_tRNALeu_TAA-	TRNAL31	yes	-0.0430687	0	B	-0.0430687	B	0	B	0	B
207	chr4:186270429-186270828	AluSx_SINE_Alu|+|chr4:186270400-186270800|186270629|29	AluSx_SINE_Alu	no	1.92376	0	A	0.270089	B	0.338802	B	-0.0430687	B
208	chr4:40603350-40603722	chr4_4_tRNAGln_TTG-	TRNAQ7	yes	0.241008	0	B	0.125531	B	0.165059	B	-0.0901978	B
209	chr4:46816001-46816726	GABRB1_Intronic(AluSp)	AluSp_SINE_ALu	yes	2.44057	3.06	A	0	B	0	B	0.192645	B
210	chr4:54039861-54040311	LNX1_Intronic(Alu_FLAM_C)	FLAM_C_SINE_Alu	no	2.56359	0	A	0.270089	B	0.556393	A	0.121991	B
211	chr4:7376589-7376960	chr4_5_Pseudo_TTA-	TRNASUP5P	yes	0.491853	0	B	0.169925	B	0.209453	B	0	B
212	chr5:135443926-135444346	HVG2|(hsa-mir-886)	VTRNA2-1_MIR886_(hsa-mir-886)	yes	3.61203	0	A	1.06413	A	0.750022	A	1	A
213	chr5:140070894-140071292	VTRNA1-1|(HVG-1)	VTRNA1-1 (HVG-1)	yes	3.80464	0	A	1	A	0.452512	B	0.839535	A
214	chr5:140078544-140078932	VTRNA1-2|(HVG-2)	VTRNA1-2 (HVG-2)	yes	4.05528	0.88	A	1.39232	A	0.954196	A	1.23071	A
215	chr5:140085777-140086165	VTRNA1-3|(HVG-3)	VTRNA1-3 (HVG-3)	yes	3.87529	0	A	1.26303	A	0.722466	A	0.807355	A
216	chr5:141754022-141754393	chr5_22_tRNAAsp_GTC-	TRNAD3	yes	-0.234465	1.1	B	-0.367732	B	-0.112475	B	-0.230765	B
217	chr5:151228117-151228488	chr5_21_Pseudo_CTG-	TRNAQ53P	yes	-0.0395284	0	B	-0.0395284	B	0.0759489	B	-0.302563	B
218	chr5:151968639-151969114	chr5_1_Pseudo_ACA_I+	TRNAC32P	yes	-0.0874628	0	B	0.0824622	B	-0.133267	B	0.121991	B
219	chr5:159324469-159324846	chr5_20_tRNALeu_CAG-		yes	-0.121991	0	B	0.0759489	B	-0.165059	B	0.112475	B
220	chr5:171663379-171663778	AluSq_SINE_Alu|+|chr5:171663600-171664000|171663579|50	AluSq_SINE_Alu	no	2.1745	0	A	0.0801703	B	0.0801703	B	0.192645	B
221	chr5:172155181-172155632	MIRb_SINE_MIR	MIRb_SINE_MIR	no	1.2824	0	A	-0.165059	B	-0.255257	B	0.182864	B
222	chr5:180456526-180456898	chr5_2_tRNAVal_CAC+		yes	3.82889	100	A	1.03747	A	0.881356	A	1.05976	A
223	chr5:180456930-180457311	chr5_19_tRNALeu_AAG-	TRNAL4	yes	3.27657	100	A	0.465664	B	0.440573	B	0.0506261	B
224	chr5:180461296-180461677	chr5_3_tRNALeu_AAG+	TRNAL24	yes	3.58496	100	A	0.655352	A	0.632268	A	0.121015	B
225	chr5:180461709-180462081	chr5_18_tRNAVal_CAC-		yes	3.66706	100	A	1.05733	A	0.812914	A	1.1253	A
226	chr5:180523610-180523982	chr5_4_tRNAVal_AAC+	TRNAV1	yes	3.54314	44.4	A	0.598637	A	0.625604	A	0.675493	A
227	chr5:180524020-180524401	chr5_17_Pseudo_AAG-	TRNAL43P	yes	2.19794	0.97	A	-0.0430687	B	0.121991	B	-0.180572	B
228	chr5:180529066-180529438	chr5_5_tRNAVal_AAC+	TRNAV3	yes	3.92057	33.53	A	1.02046	A	1.09954	A	1.17267	A
229	chr5:180533106-180533478	chr5_6_tRNAVal_CAC+		yes	3.46975	0.31	A	0.706269	A	0.306661	B	0.328422	B
230	chr5:180533500-180533881	chr5_16_tRNALeu_AAG-	TRNAL32	yes	3.43539	6.61	A	0.540568	A	0.813587	A	0.862496	A
231	chr5:180547157-180547538	chr5_7_tRNALeu_AAG+	TRNAL34	yes	4.0136	2.67	A	0.909802	A	0.510195	B	1.28563	A
232	chr5:180547872-180548244	chr5_15_tRNAVal_AAC-	TRNAV5	yes	3.7879	0.19	A	1.26679	A	1.20945	A	1.07711	A
233	chr5:180548310-180548681	chr5_14_tRNAPro_TGG-	TRNAP3	yes	3.74723	0	A	0.915111	A	0.703607	A	1.2733	A
234	chr5:180551143-180551514	chr5_13_tRNAThr_TGT-	TRNAT1	yes	3.36355	0	A	0.708537	A	0.370368	B	1.24236	A
235	chr5:180566324-180566695	chr5_8_tRNAAla_TGC+	TRNAA26	yes	3.73013	0.03	A	1.19994	A	0.744743	A	1.32193	A
236	chr5:180567211-180567583	chr5_9_tRNALys_CTT+	TRNAK18	yes	4.04696	0	A	1.10236	A	0.819428	A	0.88523	A
237	chr5:180577726-180578098	chr5_12_tRNAVal_AAC-	TRNAV10	yes	3.76155	0.02	A	1.39232	A	0.672425	A	1.16153	A
238	chr5:180581435-180581807	chr5_11_tRNALys_CTT-	TRNAK33	yes	4.1652	0	A	0.934905	A	0.745427	A	0.460974	B
239	chr5:180581851-180582223	chr5_10_tRNAVal_CAC-		yes	3.64807	2.02	A	1.03477	A	0.642448	A	1.14571	A
240	chr5:26234146-26234518	chr5_24_tRNALys_CTT-	TRNAK2	yes	-0.175087	20	B	0	B	-0.0848889	B	-0.2144	B
241	chr5:77354382-77354754	chr5_23_Pseudo_TTG-	TRNAQ33P	yes	-0.121991	0	B	0.216811	B	0.148099	B	-0.121991	B
242	chr6:126142936-126143307	chr6_87_tRNAGlu_CTC-	TRNAE19	yes	3.35181	0	A	0.703018	A	0.274175	B	0.625993	B
243	chr6:142620319-142620689	chr6_82_tRNAGly_GCC+	TRNAG29	yes	-0.165059	0	B	-0.0395284	B	0.112475	B	-0.0395284	B
244	chr6:144579227-144579609	chr6_83_tRNALeu_TAA+	TRNAL29	yes	3.24607	0	A	0.982298	A	0.708537	A	0.832273	A
245	chr6:145545402-145545773	chr6_84_tRNAGln_TTG+	TRNAQ32	yes	0.222392	0.35	B	0	B	0.0780025	B	-0.0792018	B
246	chr6:156910588-156910962	chr6_86_Pseudo_TAC-	TRNAV37P	yes	0.0801703	0	B	0.118644	B	-0.129283	B	-0.129283	B
247	chr6:163129854-163130222	chr6_85_Pseudo_TTC-	TRNAE33P	yes	-0.0848889	0	B	-0.129283	B	0	B	-0.129283	B
248	chr6:18944231-18944602	chr6_1_tRNAGln_CTG+	TRNAQ11	yes	0.459432	43.47	B	0.321928	B	0.209453	B	0.189825	B
249	chr6:26381595-26381994	AluSq_SINE_Alu|+|chr6:26381600-26382000|26381795|33	AluSq_SINE_Alu	no	2.19555	0	A	0.175087	B	0.215729	B	0.600393	B
250	chr6:26394583-26394954	chr6_2_tRNAMet_CAT+		yes	3.62838	1.07	A	1.11548	A	0.765535	A	1.13477	A
251	chr6:26407734-26408106	chr6_3_tRNAArg_TCG+	TRNAR3	yes	3.12199	0	A	0.640458	A	0.197939	B	0.40439	B
252	chr6:26413547-26413930	chr6_175_tRNASer_GCT-	TRNAS5	yes	3.89553	0.25	A	1.35548	A	0.693897	A	0.441317	B
253	chr6:26419253-26419624	chr6_174_tRNAGln_TTG-	TRNAQ5	yes	3.37551	0	A	0.518467	B	0.345135	B	0.216811	B
254	chr6:26419804-26420175	chr6_173_tRNAGln_TTG-	TRNAQ10	yes	3.7746	0	A	1.34645	A	0.801454	A	0.584963	B
255	chr6:26420653-26421034	chr6_172_tRNASer_TGA-	TRNAS1	yes	3.68957	0	A	0.812373	A	0.549339	B	-0.0356239	B
256	chr6:26421181-26421552	chr6_171_tRNAMet_CAT-		yes	3.96511	0.48	A	1.02106	A	1.12199	A	0.79212	A
257	chr6:26427159-26427530	chr6_170_tRNATrp_CCA-	TRNAW2	yes	2.91329	0	A	0.341037	B	0.263034	B	0.232661	B
258	chr6:26430875-26431247	chr6_4_tRNAArg_TCG+	TRNAR7	yes	4.17493	0	A	1.26679	A	0.930737	A	1.04439	A
259	chr6:26435646-26436027	chr6_5_tRNASer_AGA+	TRNAS2	yes	3.77923	2.82	A	1.05733	A	0.518467	B	0.462972	B
260	chr6:26436197-26436569	chr6_6_tRNAArg_ACG+	TRNAR2	yes	3.71425	0	A	1.04439	A	0.906891	A	0.634206	B
261	chr6:26438358-26438729	chr6_169_tRNAMet_CAT-		yes	3.70992	0	A	1	A	0.824913	A	0.798495	A
262	chr6:26439501-26439872	chr6_168_tRNATrp_CCA-	TRNAW9	yes	3.50696	0	A	0.818162	A	0.479993	B	0.616259	B
263	chr6:26629265-26629647	chr6_7_tRNALeu_CAG+	TRNAL26	yes	3.32629	4.06	A	0.838249	A	0.628031	A	0.95793	A
264	chr6:26640974-26641347	chr6_167_tRNAThr_AGT-	TRNAT7	yes	3.80735	0.47	A	1.12399	A	1.25376	A	1.08964	A
265	chr6:26645555-26645927	chr6_8_tRNAArg_ACG+	TRNAR10	yes	3.74979	1.14	A	0.929611	A	0.607683	A	0.780943	A
266	chr6:26646111-26646483	chr6_9_tRNAVal_CAC+	TRNAV14	yes	3.53119	1.65	A	0.664816	A	0.342888	B	0.530321	B
267	chr6:26661560-26661931	chr6_10_tRNAAla_CGC+	TRNAA5	yes	3.45615	0	A	0.906891	A	0.807355	A	0.744161	A
268	chr6:26662179-26662552	chr6_11_tRNAIle_AAT+	TRNAI1	yes	3.59797	0.69	A	0.919382	A	0.584963	A	0.528825	B
269	chr6:26663327-26663698	chr6_12_tRNAPro_AGG+	TRNAP13	yes	3.36786	0.19	A	0.745427	A	0.527247	B	0.42429	B
270	chr6:26664603-26664975	chr6_13_tRNALys_CTT+	TRNAK14	yes	4.12928	0.23	A	0.882643	A	0.70044	A	0.776104	A
271	chr6:26676915-26677305	chr6_14_tRNATyr_GTA_I+	TRNAY7	yes	3.558	0	A	1.38466	A	1.078	A	1.32193	A
272	chr6:26679921-26680293	chr6_166_tRNAAla_AGC-	TRNAA2	yes	3.94044	0	A	1.25239	A	1.02106	A	0.819428	A
273	chr6:26683627-26684016	chr6_15_tRNATyr_GTA_I+	TRNAY8	yes	2.1745	0	A	0.118644	B	0.228269	B	0.192645	B
274	chr6:26685161-26685549	chr6_16_tRNATyr_GTA_I+	TRNAY10	yes	3.92935	0	A	1.04182	A	0.866733	A	0.819428	A
275	chr6:26702931-26703319	chr6_17_tRNATyr_GTA_I+	TRNAY12	yes	3.41093	0	A	0.510195	B	0.540568	B	0.415037	B
276	chr6:26781419-26781791	chr6_18_tRNAAla_AGC+	TRNAA6	yes	0.206451	38.46	B	-0.0374747	B	0	B	0	B
277	chr6:26790544-26790916	chr6_19_tRNAAla_AGC+	TRNAA7	yes	0.662965	48.98	A	0.0780025	B	0.353637	B	0.199309	B
278	chr6:26795314-26795686	chr6_20_tRNAAla_AGC+	TRNAA8	yes	-0.269187	50	B	-0.269187	B	-0.128324	B	-0.287802	B
279	chr6:26809541-26809913	chr6_21_tRNAMet_CAT+		yes	3.18724	3.61	A	0.453718	B	-0.0317089	B	0.563901	B
280	chr6:26813435-26813807	chr6_22_tRNAAla_AGC+	TRNAA9	yes	1.32833	29.41	A	-0.206451	B	-0.0995357	B	-0.0161197	B
281	chr6:26829050-26829423	chr6_165_tRNAIle_AAT-	TRNAI4	yes	1.29956	100	A	-0.197939	B	-0.0374747	B	0.428843	B
282	chr6:26836085-26836457	chr6_23_tRNAAla_AGC+	TRNAA12	yes	2.76755	100	A	0.222392	B	-0.182864	B	0.187627	B
283	chr6:26838566-26838938	chr6_24_tRNAAla_AGC+	TRNAA13	yes	2.24961	100	A	-0.169925	B	-0.169925	B	-0.0324215	B
284	chr6:26843403-26843775	chr6_164_tRNAMet_CAT-		yes	3.39544	100	A	0.584963	A	0.540568	B	0.212994	B
285	chr6:26853084-26853457	chr6_163_tRNAIle_AAT-	TRNAI5	yes	2.89947	0.91	A	0.29956	B	0.206451	B	0.646886	B
286	chr6:26859747-26860119	chr6_25_tRNAAla_AGC+	TRNAA14	yes	1.80735	45.91	A	0.0740006	B	-0.0780025	B	0.0126	B
287	chr6:26860459-26860832	chr6_26_tRNAUndet_???+		yes	0.0331669	41.66	B	-0.296982	B	-0.338802	B	-0.338802	B
288	chr6:26866379-26866751	chr6_162_tRNAMet_CAT-		yes	3.17688	9.09	A	0.334419	B	0	B	0.0614005	B
289	chr6:26874273-26874645	chr6_27_tRNAMet_CAT+		yes	3.34819	100	A	0.429684	B	0.451379	B	0.0435016	B
290	chr6:26879119-26879491	chr6_161_tRNAAla_AGC-	TRNAA18	yes	2.12029	100	A	-0.16601	B	-0.16601	B	0.0155969	B
291	chr6:26881600-26881972	chr6_160_tRNAAla_AGC-	TRNAA20	yes	2.782	100	A	0.342888	B	-0.187627	B	0.266939	B
292	chr6:26888661-26889034	chr6_28_tRNAIle_AAT+	TRNAI8	yes	1.30743	100	A	-0.234465	B	-0.0365259	B	0.392317	B
293	chr6:26903835-26904207	chr6_159_tRNAAla_AGC-	TRNAA21	yes	0.329308	77.83	B	-0.156119	B	0.106915	B	0.157541	B
294	chr6:27095954-27096347	chr6_29_tRNAIle_TAT_I+	TRNAI2	yes	3.49099	0	A	0.462972	B	0.375509	B	0.648528	A
295	chr6:27167350-27167721	chr6_30_tRNAPro_CGG+	TRNAP10	yes	3.74147	0	A	0.70044	A	0.285402	B	0.321928	B
296	chr6:27172914-27173295	chr6_31_tRNASer_GCT+	TRNAS12	yes	3.92057	0.24	A	1.09954	A	0.95818	A	0.732838	A
297	chr6:27225851-27226223	chr6_32_tRNAVal_CAC+	TRNAV15	yes	0.209453	0	B	0.0443941	B	0.0443941	B	0.169925	B
298	chr6:27233735-27234106	chr6_33_tRNAHis_GTG+	TRNAH3	yes	4.12153	0.23	A	0.97728	A	0.72792	A	0.841302	A
299	chr6:27237879-27238252	chr6_34_tRNAThr_AGT+	TRNAT14	yes	3.64725	0	A	0.667425	A	0.270089	B	0.436099	B
300	chr6:27252823-27253196	chr6_158_tRNAIle_AAT-	TRNAI9	yes	3.21261	0.39	A	0.980371	A	0.623437	A	0.356347	B
301	chr6:27281696-27282068	chr6_157_tRNAVal_CAC-	TRNAV20	yes	1.25634	0	A	-0.0824622	B	0.115477	B	-0.169925	B
302	chr6:27285457-27285838	chr6_35_tRNASer_CGA+	TRNAS7	yes	1.41504	0.52	A	-0.0901978	B	0	B	0.203533	B
303	chr6:27289452-27289824	chr6_156_tRNAArg_ACG-	TRNAR17	yes	2.97323	0.25	A	0.4975	B	0.234465	B	0.270089	B
304	chr6:27290781-27291153	chr6_36_tRNAArg_ACG+	TRNAR26	yes	3.28065	0.17	A	0.758992	A	0.442518	B	0.387023	B
305	chr6:27306163-27306545	chr6_155_tRNALeu_TAA-	TRNAL10	yes	3.78958	0	A	1	A	0.703607	A	0.455679	B
306	chr6:27311117-27311489	chr6_37_tRNAVal_AAC+	TRNAV7	yes	3.32992	0	A	0.584963	A	0.384664	B	0.0780025	B
307	chr6:27313179-27313552	chr6_154_tRNAIle_AAT-	TRNAI11	yes	3.73697	1.19	A	0.977974	A	0.788496	A	0.140151	B
308	chr6:27349568-27349941	chr6_38_tRNAIle_AAT+	TRNAI12	yes	-0.121991	0	B	-0.255257	B	-0.209453	B	-0.165059	B
309	chr6:27350819-27351192	chr6_153_tRNAIle_AAT-	TRNAI17	yes	2.40439	0	A	0.121991	B	-0.133267	B	0.0824622	B
310	chr6:27355878-27356250	chr6_152_tRNAVal_CAC-	TRNAV21	yes	3.75803	0	A	1.32193	A	0.4975	B	0.343587	B
311	chr6:27359693-27360066	chr6_39_Pseudo_AAT+	TRNAI28P	yes	0.133267	11.21	B	0.175087	B	0.255257	B	0.21716	B
312	chr6:27366234-27366606	chr6_40_tRNAVal_TAC+	TRNAV31	yes	3.64943	0	A	0.718229	A	0.331206	B	0.438121	B
313	chr6:27369500-27369873	chr6_41_Pseudo_ACT+	TRNAS32P	yes	3.848	0	A	0.793549	A	0.847997	A	0.793549	A
314	chr6:27371041-27371412	chr6_42_tRNAGln_CTG+	TRNAQ16	yes	3.60288	0	A	0.536053	A	0.232661	B	0.632268	B
315	chr6:27373604-27373985	chr6_43_tRNASer_GCT+	TRNAS13	yes	3.65862	0.29	A	1	A	0.728698	A	0.603167	B
316	chr6:27379397-27379768	chr6_151_tRNAThr_CGT-	TRNAT5	yes	3.44668	0	A	0.630766	A	0.438121	B	0.600393	B
317	chr6:27408593-27408964	chr6_150_tRNAMet_CAT-		yes	3.69165	0	A	0.90182	A	0.559427	A	0.363097	B
318	chr6:27410598-27410970	chr6_149_tRNALys_TTT-	TRNAK8	yes	3.12199	0	A	0.436099	B	0	B	0.234465	B
319	chr6:27554420-27554801	chr6_44_tRNASer_AGA+	TRNAS4	yes	4.00729	2.81	A	1.51847	A	0.940294	A	1.04793	A
320	chr6:27555282-27555653	chr6_45_tRNAAsp_GTC+	TRNAD8	yes	3.43539	0	A	0.788496	A	-0.0331669	B	0.722586	A
321	chr6:27571422-27571803	chr6_46_tRNASer_AGA+	TRNAS9	yes	4.03666	2.78	A	1.38827	A	0.745427	A	1.30485	A
322	chr6:27578647-27579028	chr6_47_tRNASer_AGA+	TRNAS10	yes	3.87553	2.88	A	0.878694	A	0.68966	A	0.553598	B
323	chr6:27579352-27579723	chr6_48_tRNAAsp_GTC+	TRNAD9	yes	3.85175	0	A	0.78136	A	0.523562	B	0.378722	B
324	chr6:27581436-27581817	chr6_148_tRNASer_TGA-	TRNAS3	yes	3.57845	0	A	0.812914	A	0.216811	B	0.648528	A
325	chr6:27595137-27595508	chr6_49_tRNAGln_CTG+	TRNAQ17	yes	3.63777	0	A	1.09192	A	1.03747	A	0.839535	A
326	chr6:27607816-27608197	chr6_50_tRNASer_AGA+	TRNAS19	yes	1.06817	0	A	0.215729	B	0.133267	B	0.0458037	B
327	chr6:27617383-27617764	chr6_147_tRNASer_AGA-	TRNAS24	yes	2.67516	0	A	0.472068	B	0.255257	B	0.331206	B
328	chr6:27621297-27621678	chr6_51_tRNASer_TGA+	TRNAS27	yes	3.48278	0	A	0.572579	A	0.29956	B	0.645335	B
329	chr6:27623360-27623731	chr6_146_tRNAGln_CTG-	TRNAQ21	yes	3.22239	0	A	0.762961	A	0.599462	A	0.656046	A
330	chr6:27629021-27629402	chr6_145_tRNASer_AGA-	TRNAS25	yes	3.09433	0	A	0.148099	B	0.314109	B	0.249978	B
331	chr6:27637792-27638178	chr6_52_tRNAArg_TCT_I+	TRNAR5	yes	1.57032	0	A	0	B	-0.137504	B	0.277534	B
332	chr6:27651675-27652047	chr6_53_tRNALys_TTT+	TRNAK19	yes	0.92785	0	A	-0.109624	B	-0.403356	B	-0.148099	B
333	chr6:27659065-27659436	chr6_144_tRNAAsp_GTC-	TRNAD14	yes	3.30378	0	A	0.807355	A	0.426265	B	0.584963	B
334	chr6:27667422-27667794	chr6_143_tRNALys_TTT-	TRNAK22	yes	3.41626	0	A	0.623437	A	0.518467	B	0.6894	A
335	chr6:27668473-27668800	chr6_142_tRNAMet_CAT-		yes	3.68299	1.28	A	1.18982	A	1.20945	A	1.04166	A
336	chr6:27678177-27678583	chr6_141_tRNALeu_CAA_I-	TRNAL8	yes	2.57225	1.96	A	0.109624	B	0.337035	B	0.216298	B
337	chr6:27681246-27681653	chr6_140_tRNALeu_CAA_I-	TRNAL22	yes	3.22668	0	A	0.5025	B	0.444785	B	0.530515	B
338	chr6:27693964-27694337	chr6_54_tRNAThr_CGT+	TRNAT11	yes	2.91359	0	A	-0.140863	B	-0.140863	B	0.217591	B
339	chr6:27707029-27707422	chr6_55_tRNAIle_TAT_I+	TRNAI6	yes	3.22386	0	A	0.296982	B	0.296982	B	0.330149	B
340	chr6:27726536-27726908	chr6_139_tRNAVal_AAC-	TRNAV8	yes	2.79055	0	A	0.0759489	B	0.0759489	B	0.0384741	B
341	chr6:27740374-27740749	chr6_56_tRNAPhe_GAA+	TRNAF3	yes	-0.0848889	0	B	0.040642	B	-0.129283	B	-0.222392	B
342	chr6:27744191-27744564	chr6_57_tRNAIle_AAT+	TRNAI20	yes	3.73013	0	A	0.545434	A	0.216811	B	0.249978	B
343	chr6:27746173-27746545	chr6_138_tRNAArg_ACG-	TRNAR29	yes	3.16993	0.88	A	0.4975	B	0.467126	B	0.197939	B
344	chr6:27748058-27748439	chr6_137_tRNASer_CGA-	TRNAS15	yes	2.65821	0	A	0.523562	A	0.0874628	B	0.491853	B
345	chr6:27756714-27757086	chr6_136_tRNAVal_AAC-	TRNAV12	yes	1.24576	0	A	0.118644	B	-0.0418202	B	-0.0418202	B
346	chr6:27758317-27758690	chr6_58_tRNAVal_CAC+	TRNAV27	yes	0.180572	0.64	B	0.180572	B	0.180572	B	0.00226561	B
347	chr6:27760303-27760676	chr6_135_tRNAThr_AGT-	TRNAT15	yes	3.5518	0.68	A	0.710493	A	0.381871	B	0.540568	B
348	chr6:27763796-27764169	chr6_59_tRNAIle_AAT+	TRNAI22	yes	4.11864	0	A	1.44057	A	0.777608	A	0.828786	A
349	chr6:27796727-27797109	chr6_134_tRNALeu_TAA-	TRNAL16	yes	2.01886	0	A	-0.247928	B	-0.203533	B	0.109624	B
350	chr6:27802302-27802675	chr6_60_tRNAThr_AGT+	TRNAT18	yes	1	0	A	-0.156119	B	0.0365259	B	-0.241008	B
351	chr6:27804156-27804528	chr6_133_tRNAVal_CAC-	TRNAV28	yes	0	0	B	0.0443941	B	-0.0458037	B	0.209453	B
352	chr6:27829008-27829380	chr6_132_tRNAVal_AAC-	TRNAV17	yes	3.61005	0	A	1.17834	A	0.961526	A	0.761061	A
353	chr6:27853493-27853864	chr6_61_tRNAMet_CAT+		yes	1.63077	0	A	0.0458037	B	0.133267	B	0.255257	B
354	chr6:27866964-27867335	chr6_131_tRNAGln_CTG-	TRNAQ22	yes	3.88408	0	A	1.51245	A	0.912537	A	1.30485	A
355	chr6:27871469-27871840	chr6_130_tRNAGln_TTG-	TRNAQ12	yes	3.82597	0	A	0.955606	A	0.656046	A	1.30433	A
356	chr6:27978100-27978471	chr6_129_tRNAMet_CAT-		yes	3.56071	0	A	0.830075	A	0.39079	B	0.715161	A
357	chr6:27978515-27978885	chr6_128_tRNAGly_GCC-	TRNAG12	yes	3.75489	0	A	1.19502	A	0.881356	A	1.23467	A
358	chr6:28288644-28289025	chr6_62_tRNASer_GCT+	TRNAS16	yes	4.07948	0	A	1.52356	A	0.78136	A	1.45943	A
359	chr6:28550158-28550531	chr6_127_tRNAThr_TGT-	TRNAT16	yes	3.67243	0	A	0.744161	A	0.378512	B	0.536053	B
360	chr6:28554229-28554610	chr6_126_tRNALeu_AAG-	TRNAL12	yes	0.449803	0	B	-0.228269	B	-0.270089	B	-0.228269	B
361	chr6:28564599-28564972	chr6_125_tRNAThr_CGT-	TRNAT13	yes	3.56009	0	A	0.645335	A	0	B	0.0721498	B
362	chr6:28613196-28613589	chr6_63_tRNAIle_TAT_I+	TRNAI21	yes	1.17509	0	A	0.0901978	B	0.215729	B	0	B
363	chr6:28618720-28619092	chr6_124_tRNAArg_TCG-	TRNAR28	yes	3.90046	0	A	1	A	0.847997	A	0.616671	B
364	chr6:28664985-28665356	chr6_64_tRNAGln_TTG+	TRNAQ15	yes	4.04564	0	A	1.22827	A	0.571157	A	0.514573	B
365	chr6:28672946-28673327	chr6_123_tRNASer_GCT-	TRNAS17	yes	3.35325	2.51	A	0.750972	A	0.771731	A	0.31958	B
366	chr6:28682762-28683133	chr6_65_tRNAAla_AGC+	TRNAA22	yes	3.60543	0	A	0.678072	A	0.485427	B	0.455679	B
367	chr6:28709688-28710059	chr6_122_Pseudo_TGC-	TRNAA46P	yes	0.209453	0	B	0.0443941	B	-0.0931094	B	0.0443941	B
368	chr6:28719051-28719422	chr6_66_tRNAAla_TGC+	TRNAA1	yes	3.34873	0	A	0.491853	B	0.129283	B	0.357552	B
369	chr6:28723813-28724186	chr6_121_tRNAThr_CGT-	TRNAT17	yes	3.48403	0	A	0.812914	A	0.375509	B	0.545434	B
370	chr6:28733843-28734214	chr6_120_tRNAAla_AGC-	TRNAA24	yes	3.43463	0	A	0.930737	A	0.857981	A	0.247928	B
371	chr6:28749442-28749813	chr6_119_tRNAAla_CGC-	TRNAA29	yes	3.8314	0	A	1.19794	A	0.79518	A	1.55639	A
372	chr6:28768816-28769189	chr6_118_Pseudo_TTT-	TRNAK43P	yes	1.6909	0	A	-0.0848889	B	0.0801703	B	0.040642	B
373	chr6:28771538-28771909	chr6_117_tRNAAla_CGC-	TRNAA38	yes	1.90689	0	A	0.129283	B	-0.0458037	B	0.0443941	B
374	chr6:28786195-28786566	chr6_67_tRNAAla_AGC+	TRNAA27	yes	2.80735	0	A	0.426265	B	0.209453	B	0.129283	B
375	chr6:28795310-28795681	chr6_68_tRNAAla_AGC+	TRNAA28	yes	2.25442	0	A	0.192645	B	0	B	0.308122	B
376	chr6:28801624-28801997	chr6_69_tRNAThr_AGT+	TRNAT21	yes	2.59128	0	A	0	B	-0.203533	B	-0.203533	B
377	chr6:28802684-28803056	chr6_116_Pseudo_GAA-	TRNAF13P	yes	-0.118644	0	B	-0.0780025	B	-0.0780025	B	-0.341037	B
378	chr6:28804921-28805292	chr6_70_tRNAAla_CGC+	TRNAA40	yes	3.67671	0	A	0.886343	A	0.788496	A	0.540568	B
379	chr6:28811035-28811406	chr6_115_tRNAVal_AAC-	TRNAV18	yes	3.10992	0	A	0.552541	A	0.302563	B	0.736966	A
380	chr6:28818558-28818930	chr6_114_tRNAArg_CCG-	TRNAR9	yes	3.44294	0	A	0.584963	A	0.426265	B	0.554589	B
381	chr6:28823350-28823722	chr6_71_tRNALys_TTT+	TRNAK29	yes	3.54057	0	A	0.510195	B	0.241008	B	0.277534	B
382	chr6:28833970-28834341	chr6_113_tRNAAla_TGC-	TRNAA10	yes	2.8594	0	A	0.296982	B	0	B	0.425306	B
383	chr6:28839203-28839576	chr6_112_tRNAPhe_GAA-	TRNAF4	yes	0.0443941	0	B	-0.0458037	B	0.0874628	B	-0.0931094	B
384	chr6:28839993-28840365	chr6_72_tRNAPhe_GAA+	TRNAF5	yes	0.889817	0	A	0.160465	B	0	B	0.160465	B
385	chr6:28854373-28854744	chr6_111_Pseudo_AGC-	TRNAA44P	yes	0.874469	8.61	A	0.263034	B	0.485427	B	0.112195	B
386	chr6:28865376-28865747	chr6_110_tRNAAla_TGC-	TRNAA11	yes	3.40157	0	A	0.597902	A	0.375509	B	0.518467	B
387	chr6:28866328-28866700	chr6_109_tRNAPhe_GAA-	TRNAF7	yes	3.06547	0.66	A	0.485427	B	0.425306	B	-0.0285936	B
388	chr6:28871570-28871941	chr6_108_tRNAAla_AGC-	TRNAA30	yes	3.63346	3.1	A	0.962525	A	0.645335	A	0.597745	B
389	chr6:28878406-28878776	chr6_107_tRNAAla_TGC-	TRNAA15	yes	3.21945	2.07	A	0.228269	B	0.330149	B	-0.0207586	B
390	chr6:28883439-28883811	chr6_106_tRNAPhe_GAA-	TRNAF8	yes	3.44931	0	A	0.691878	A	0.358454	B	0.884523	A
391	chr6:28887678-28888049	chr6_105_tRNAAla_AGC-	TRNAA31	yes	3.29278	4.5	A	0.543142	A	0.485427	B	0.514573	B
392	chr6:28892841-28893212	chr6_104_tRNAAla_TGC-	TRNAA19	yes	3.50371	1.66	A	0.514573	B	0.543142	B	0.34645	B
393	chr6:28898922-28899295	chr6_103_tRNAPhe_GAA-	TRNAF9	yes	0.560715	0	B	-0.277534	B	-0.367732	B	-0.277534	B
394	chr6:28914050-28914421	chr6_102_tRNAAla_AGC-	TRNAA33	yes	3.75974	0	A	1.24101	A	0.736966	A	0.594645	B
395	chr6:28939291-28939662	chr6_101_tRNAAla_AGC-	TRNAA34	yes	3.69165	0	A	1.01886	A	0.634716	A	0.857108	A
396	chr6:28956994-28957366	chr6_73_tRNAArg_CCG+	TRNAR24	yes	3.68576	0	A	0.68281	A	0.658963	A	0.980891	A
397	chr6:28971829-28972234	chr6_100_tRNALeu_CAA_I-	TRNAL25	yes	3.71497	2.28	A	1.27563	A	0.941897	A	1.29811	A
398	chr6:29016659-29017063	chr6_74_tRNALeu_CAA_I+	TRNAL28	yes	3.95693	0	A	1.654	A	1.21632	A	1.21632	A
399	chr6:29017207-29017578	chr6_99_tRNAGln_CTG-	TRNAQ27	yes	3.51281	1.39	A	0.946229	A	0.370368	B	0.537266	B
400	chr6:29019228-29019609	chr6_98_tRNALeu_AAG-	TRNAL17	yes	3.85798	2.82	A	1.18982	A	0.857981	A	1.59171	A
401	chr6:29020181-29020553	chr6_75_tRNAMet_CAT+		yes	3.9098	0	A	1.31316	A	1.18442	A	1.31316	A
402	chr6:29026635-29027007	chr6_76_tRNALys_TTT+	TRNAK31	yes	3.6746	1.04	A	0.843881	A	0.668794	A	0.89782	A
403	chr6:29028871-29029243	chr6_97_tRNAMet_CAT-		yes	3.57845	0	A	0.980371	A	0.434403	B	0.490986	B
404	chr6:29057278-29057650	chr6_96_tRNAPhe_GAA-	TRNAF12	yes	3.71049	0	A	0.955606	A	0.683526	A	0.604263	B
405	chr6:29057805-29058176	chr6_77_tRNAGlu_CTC+	TRNAE6	yes	3.8609	0.85	A	1.10236	A	0.912537	A	1.25525	A
406	chr6:29064608-29064989	chr6_78_tRNALeu_AAG+	TRNAL20	yes	3.34577	0	A	0.616671	A	0.552541	B	0.385891	B
407	chr6:37395823-37396195	chr6_79_tRNAGln_TTG+	TRNAQ25	yes	0.209453	0	B	0.0874628	B	-0.0458037	B	0.321928	B
408	chr6:52968226-52968858	7SK_RNA	RN7SK_(7SK_RNA)	yes	4.02342	30.06	A	1.14684	A	0.85561	A	0.53842	B
409	chr6:58249686-58250058	chr6_95_tRNAAla_AGC-	TRNAA35	yes	1.94753	7.24	A	0.296982	B	-0.222392	B	0.040642	B
410	chr6:58250398-58250770	chr6_94_tRNAAla_AGC-	TRNAA36	yes	3.03342	18.25	A	0.491853	B	0.643856	A	0.142958	B
411	chr6:58257063-58257436	chr6_80_tRNAIle_AAT+	TRNAI25	yes	1.365	5.83	A	0.0848889	B	0.203533	B	0.710493	A
412	chr6:58272437-58272809	chr6_93_tRNAAla_AGC-	TRNAA37	yes	0.736966	69.23	A	-0.115477	B	-0.156119	B	0.0896372	B
413	chr6:58276301-58276673	chr6_92_tRNAMet_CAT-		yes	0.321928	73.13	B	-0.0740006	B	-0.0740006	B	-0.0365259	B
414	chr6:58290488-58290860	chr6_91_tRNAAla_AGC-	TRNAA41	yes	0.0356239	36	B	-0.0740006	B	-0.192645	B	-0.132104	B
415	chr6:58295253-58295625	chr6_90_tRNAAla_AGC-	TRNAA42	yes	0.160465	42.16	B	0.0418202	B	0.121991	B	0	B
416	chr6:58304432-58304804	chr6_89_tRNAAla_AGC-	TRNAA43	yes	0.182864	8.86	B	-0.0801703	B	-0.0801703	B	-0.165059	B
417	chr6:69970949-69971331	chr6_81_tRNALeu_TAA+	TRNAL18	yes	-0.175087	0	B	-0.0418202	B	0	B	0.040642	B
418	chr6:79724579-79724951	chr6_88_Pseudo_GAA-	TRNAF15P	yes	0.215729	0	B	0.0901978	B	0.133267	B	0.0458037	B
419	chr7:128210590-128210961	chr7_2_tRNAPro_AGG+	TRNAP15	yes	3.65344	0.21	A	1.01495	A	0.437405	B	1.28077	A
420	chr7:138675836-138676208	chr7_3_tRNAArg_CCT+	TRNAR27	yes	3.61935	0	A	1	A	0.729352	A	1.19502	A
421	chr7:141149676-141150047	chr7_4_Pseudo_TTG+	TRNAQ52P	yes	-0.121991	0	B	-0.121991	B	-0.121991	B	-0.302563	B
422	chr7:148269362-148269746	hY5_RNA	RNY5_MIR1975_(hsa-mir-1975)	yes	3.40839	0	A	0.667425	A	0.160465	B	0.612977	B
423	chr7:148291189-148291582	hY4_RNA	RNY4	yes	3.64725	0.77	A	0.956931	A	0.866733	A	0.467126	B
424	chr7:148311629-148312030	hY3_RNA	RNY3	yes	3.54844	5.14	A	1.01792	A	0.632268	A	0.604862	B
425	chr7:148315011-148315423	hY1_RNA	RNY1	yes	3.67624	0	A	1.03847	A	0.545434	B	0.434403	B
426	chr7:148638064-148638435	chr7_5_tRNACys_GCA+	TRNAC2	yes	2.67948	2.62	A	0.392317	B	0.523562	B	0.303781	B
427	chr7:148659003-148659374	chr7_6_tRNACys_GCA+	TRNAC3	yes	0.878009	1.61	A	-0.0395284	B	-0.255257	B	-0.165059	B
428	chr7:148683549-148683920	chr7_25_tRNACys_GCA-	TRNAC4	yes	0.878694	0	A	0	B	0	B	0.293731	B
429	chr7:148684528-148684903	chr7_24_Pseudo_GTA-	TRNAY17P	yes	-0.169925	0	B	-0.263034	B	-0.0824622	B	-0.125531	B
430	chr7:148703633-148704004	chr7_23_tRNACys_GCA-	TRNAC6	yes	0.211504	0	B	-0.160465	B	-0.247928	B	0.14439	B
431	chr7:148705384-148705755	chr7_22_tRNACys_GCA-	TRNAC8	yes	0.331206	6.25	B	0	B	0.133267	B	0.0901978	B
432	chr7:148743012-148743383	chr7_21_tRNACys_GCA-	TRNAC10	yes	2.6865	0	A	0.247928	B	0.129283	B	0.643856	B
433	chr7:148874414-148874785	chr7_7_tRNACys_GCA+	TRNAC11	yes	0.0901978	0	B	0.175087	B	0.255257	B	0.0458037	B
434	chr7:148884585-148884956	chr7_8_tRNACys_GCA+	TRNAC13	yes	0.197939	20	B	-0.0874628	B	0.160465	B	0.197939	B
435	chr7:148885916-148886288	chr7_9_tRNATyr_GTA+	TRNAY11	yes	0.192645	3.03	B	-0.129283	B	-0.0418202	B	0.040642	B
436	chr7:148912599-148912970	chr7_10_tRNACys_GCA+	TRNAC15	yes	0.304855	0	B	0.0824622	B	0	B	-0.0430687	B
437	chr7:148916947-148917318	chr7_20_tRNACys_GCA-	TRNAC19	yes	0.215729	0	B	0.215729	B	-0.0473057	B	0.0901978	B
438	chr7:148923088-148923459	chr7_19_tRNACys_GCA-	TRNAC20	yes	0.0848889	22.22	B	0.203533	B	0.203533	B	0.165059	B
439	chr7:148925829-148926200	chr7_11_tRNACys_GCA+	TRNAC21	yes	-0.0721498	18.75	B	-0.228269	B	-0.148099	B	-0.228269	B
440	chr7:148936250-148936621	chr7_12_tRNASer_AGA+	TRNAS28	yes	0.270089	0	B	0.121991	B	0.0418202	B	-0.0430687	B
441	chr7:148940939-148941310	chr7_18_tRNACys_GCA-	TRNAC22	yes	-0.0418202	0	B	0.228269	B	-0.0848889	B	-0.0418202	B
442	chr7:148963561-148963932	chr7_13_tRNACys_GCA+	TRNAC23	yes	0.415037	5.88	B	0.222392	B	0	B	0.180572	B
443	chr7:148974829-148975200	chr7_17_tRNACys_GCA-	TRNAC25	yes	0.956931	0.1	A	-0.0874628	B	0	B	0.198058	B
444	chr7:148992698-148993069	chr7_14_tRNACys_GCA+	TRNAC26	yes	0.277534	11.76	B	0	B	0.0430687	B	0.0848889	B
445	chr7:149019055-149019426	chr7_16_tRNACys_GCA-	TRNAC27	yes	2.81323	1.69	A	0.156119	B	0.0801703	B	0.485427	B
446	chr7:149035543-149035914	chr7_15_tRNACys_GCA+	TRNAC28	yes	2.84918	0	A	0.270089	B	-0.0430687	B	0.371969	B
447	chr7:57257772-57258143	chr7_26_Pseudo_TTG-	TRNAQ48P	yes	0.160465	0	B	-0.180572	B	0	B	-0.0430687	B
448	chr7:98905093-98905464	chr7_1_tRNATrp_CCA+	TRNAW6	yes	0.623437	0	A	-0.0801703	B	-0.165059	B	-0.0395284	B
449	chr8:11830639-11831010	chr8_1_Pseudo_CTC+	TRNAE28P	yes	0.137504	6.25	B	0.0473057	B	0	B	0	B
450	chr8:124238501-124238873	chr8_10_tRNAMet_CAT-	TRNAM11	yes	3.83072	0	A	1.47063	A	0.824913	A	1.06054	A
451	chr8:124339756-124340128	chr8_9_Pseudo_GAA-	TRNAF14P	yes	0	0	B	-0.129283	B	-0.175087	B	0.0801703	B
452	chr8:17396915-17397314	OTHER_10|+|chr8:17396800-17397200|17397115|42	OTHER_10	no	1.66742	0	A	0.0824622	B	0	B	-0.0430687	B
453	chr8:18164333-18164702	chr8_2_Pseudo_TTT+	TRNAE17	yes	0.612977	0	A	0	B	0	B	0.304855	B
454	chr8:32992038-32992409	chr8_14_Pseudo_TTG-	TRNAQ43P	yes	-0.0848889	0	B	-0.175087	B	0.0801703	B	0.296982	B
455	chr8:47859053-47859427	chr8_13_Pseudo_TAA-	TRNAL41P	yes	-0.0418202	0	B	-0.175087	B	-0.0418202	B	-0.222392	B
456	chr8:59667202-59667572	chr8_3_tRNAGlu_CTC+	TRNAE35P	yes	-0.0458037	0	B	0.0443941	B	0.169925	B	0.285402	B
457	chr8:66771936-66772323	chr8_12_tRNATyr_GTA_I-	TRNAY5	yes	0.156119	0	B	-0.0848889	B	0.0801703	B	-0.0418202	B
458	chr8:67188006-67188398	chr8_4_tRNATyr_GTA_I+	TRNAY6	yes	3.98584	0	A	1.70044	A	1	A	1.50779	A
459	chr8:67188627-67188921	chr8_5_tRNATyr_GTA_I+	TRNAY15	yes	3.70736	0	A	1.18982	A	1	A	0.807355	A
460	chr8:67188922-67189200	chr8_6_tRNAAla_AGC+	TRNAA39	yes	3.7037	0	A	1.32193	A	0.912537	A	0.467126	B
461	chr8:70234744-70235118	chr8_7_Pseudo_CTC+		yes	0.0430687	0	B	0.0848889	B	0.0848889	B	0.0848889	B
462	chr8:90485249-90485944	HUERS-P1_LTR_ERV1	HUERS-P1_LTR_ERV1	yes	2.08092	0	A	-0.0374747	B	0.0721498	B	0.415037	B
463	chr8:96350911-96351292	chr8_11_tRNASer_AGA-	TRNAS20	yes	3.47883	2.72	A	0.98457	A	0.802963	A	0.820451	A
464	chr8:99222488-99222856	chr8_8_tRNAUndet_???+		yes	0.0430687	0	B	0.165059	B	0.0848889	B	0.125531	B
465	chr9:111507645-111508149	MIR_SINE_MIR	MIR_SINE_MIR	no	3.01381	0	A	0.174029	B	0.174029	B	0.358454	B
466	chr9:112000474-112000846	chr9_2_tRNAArg_TCG+	TRNAR6	yes	0.321928	2.91	B	0.169925	B	0.0874628	B	0.0078028	B
467	chr9:114656660-114657058	chr9_3_tRNATrp_CCA_I+	TRNAW8	yes	-0.133267	0	B	-0.133267	B	-0.0874628	B	0.121991	B
468	chr9:125695193-125695565	chr9_5_tRNAGln_CTG-	TRNAQ6	yes	0.277534	0	B	-0.137504	B	0.0430687	B	-0.0443941	B
469	chr9:130142026-130142416	chr9_4_tRNAArg_TCT_I-	TRNAR12	yes	1.82597	0	A	0.0430687	B	0.241008	B	0.415037	B
470	chr9:136019232-136019657	RNU6ATAC	RNU6ATAC	yes	3.56204	0.6	A	0.980371	A	0.67319	A	1.05733	A
471	chr9:14423788-14424159	chr9_7_tRNAHis_GTG-	TRNAH5	yes	3.58496	0.35	A	0.630766	A	0.600393	A	0.755462	A
472	chr9:19393846-19394220	chr9_1_tRNAMet_CAT+	TRNAM10	yes	-0.203533	0	B	-0.293731	B	-0.247928	B	-0.0780025	B
473	chr9:35647599-35648164	RNaseMRP_RNA	RMRP_(RNaseMRP_RNA)	yes	4.08166	0	A	1.38606	A	0.966833	A	0.769387	A
474	chr9:5084935-5085306	chr9_8_tRNAGln_TTG-	TRNAQ9	yes	-0.0430687	0	B	-0.0430687	B	0	B	-0.0430687	B
475	chr9:66197811-66198232	5S_rRNA-related	5S_rRNA-related	yes	2.04836	4.2	A	0.0324215	B	-0.0331669	B	-0.10188	B
476	chr9:76707660-76708031	chr9_6_tRNAAsp_GTC-	TRNAD2	yes	0	29.13	B	-0.0430687	B	-0.0874628	B	-0.00169923	B
477	chr10:103796334-103796733	AluSp_SINE_Alu|+|chr10:103796400-103796800|103796534|39	AluSp_SINE_Alu	no	1.58496	0	A	0.0395284	B	0.222392	B	0.415037	B
478	chr10:114657630-114658029	AluSp_SINE_Alu|+|chr10:114657600-114658000|114657830|40	AluSp_SINE_Alu	no	2.22827	0	A	0.118644	B	-0.0418202	B	0.228269	B
479	chr10:20076464-20076838	chr10_5_Pseudo_CTG-	TRNAQ38P	yes	0.0874628	0	B	0.169925	B	0.247928	B	0.247928	B
480	chr10:22558294-22558667	chr10_4_tRNAAsn_GTT-	TRNAN11	yes	3.66197	0.81	A	0.881356	A	0.706269	A	0.642843	B
481	chr10:22892435-22892807	chr10_1_Pseudo_GGG+	TRNAP22P	yes	0.129283	0	B	-0.0458037	B	-0.0458037	B	0.0874628	B
482	chr10:23326044-23326436	5S_rRNA-related	5S_rRNA-related	no	1.81816	0	A	-0.203533	B	0	B	-0.0780025	B
483	chr10:25223524-25223941	MIR_SINE_MIR	MIR_SINE_MIR	yes	1.02046	0	A	0	B	-0.0418202	B	0	B
484	chr10:27429279-27429678	NM_014915|ANKRD26(-)|+|chr10:27429200-27429600|27429479|51	NM_014915	no	1.73306	0	A	0.0384741	B	0.2824	B	0.148099	B
485	chr10:34631272-34631639	chr10_3_Pseudo_CAA-	TRNAL44P	yes	0.118644	0	B	0.040642	B	0.118644	B	0	B
486	chr10:50265290-50265700	AluSx_SINE_Alu	AluSx_SINE_Alu	yes	1.66742	0.25	A	0.0824622	B	0.197939	B	0.0418202	B
487	chr10:5935530-5935902	chr10_6_tRNAVal_TAC-	TRNAV26	yes	1.73697	0	A	0.341037	B	0.222392	B	0.0931094	B
488	chr10:69194117-69194498	chr10_2_tRNASer_TGA+	TRNAS21	yes	3.62449	0	A	1.14543	A	0.788496	A	1.33065	A
489	chr11:108541099-108541480	chr11_10_tRNASer_AGA+	TRNAS26	yes	0.255257	0	B	0.505235	B	0	B	0.215729	B
490	chr11:121935715-121936087	chr11_11_tRNALys_TTT+	TRNAK27	yes	2.17991	3.44	A	0.209453	B	0.169925	B	0.169925	B
491	chr11:35504595-35504987	OTHER1|(RP3TR1)	OTHER1	yes	3.6095	0	A	0.843274	A	0.371969	B	0.436099	B
492	chr11:45246626-45246999	chr11_19_tRNATrp_CCA-	TRNAW1	yes	0.0374747	0	B	-0.0780025	B	-0.293731	B	-0.160465	B
493	chr11:50190305-50190676	chr11_18_tRNAAla_TGC-	TRNAA25	yes	0.255257	0	B	0.255257	B	0.0901978	B	0.175087	B
494	chr11:51216326-51216698	chr11_2_tRNALys_CTT+	TRNAK5	yes	-0.0473057	0	B	0	B	-0.0473057	B	-0.0473057	B
495	chr11:59074528-59074893	chr11_17_tRNAVal_TAC-	TRNAV11	yes	4.11473	0	A	1.3604	A	1.07595	A	0.899071	A
496	chr11:59074893-59075225	chr11_16_tRNAVal_TAC-	TRNAV23	yes	4.13262	0	A	1.46297	A	0.834941	A	1.75633	A
497	chr11:59075226-59075578	chr11_3_tRNAArg_TCT_I+	TRNAR14	yes	4.22159	0	A	1.40939	A	0.857981	A	1.64386	A
498	chr11:59075654-59076036	chr11_4_tRNALeu_TAA+	TRNAL23	yes	3.59724	0	A	0.758992	A	0.547488	B	0.29956	B
499	chr11:59080328-59080700	chr11_5_tRNALys_TTT+	TRNAK3	yes	3.71926	0	A	0.771731	A	0.342888	B	0.792195	A
500	chr11:59081396-59081768	chr11_15_tRNAPhe_GAA-	TRNAF1	yes	3.6389	0.35	A	0.915111	A	0.571157	A	0.302691	B
501	chr11:59084234-59084606	chr11_14_tRNALys_TTT-	TRNAK23	yes	3.79256	0.53	A	0.870717	A	0.824913	A	1.22239	A
502	chr11:59090279-59090651	chr11_13_tRNAPhe_GAA-	TRNAF11	yes	3.90689	0	A	1.40439	A	1.04182	A	0.234465	B
503	chr11:60519934-60520303	chr11_6_Pseudo_TGC+	TRNAA45P	yes	0.169925	0	B	0.0874628	B	0.285402	B	0.0874628	B
504	chr11:63418193-63418561	chr11_7_Pseudo_CCT+	TRNAR34P	yes	0.255257	14.34	B	0.293731	B	0.175087	B	0.0458037	B
505	chr11:65872017-65872398	chr11_8_tRNASer_GCT+	TRNAS22	yes	3.86842	0	A	1.36678	A	0.68281	A	1.17834	A
506	chr11:67984015-67984407	tRNA-derived	tRNA-derived	yes	3.77479	0	A	1.16993	A	0.672425	A	1	A
507	chr11:75624055-75624396	chr11_9_tRNAPro_AGG+	TRNAP6	yes	3.71799	0.22	A	0.89812	A	0.540568	B	0.682675	A
508	chr11:75624397-75624738	chr11_12_tRNAPro_TGG-	TRNAP14	yes	3.57023	0	A	0.792195	A	0.342888	B	1	A
509	chr11:9253216-9253589	chr11_1_tRNALeu_CAA+	TRNAL36	yes	0.0443941	0	B	-0.0931094	B	0.0874628	B	0.0443941	B
510	chr12:103042993-103043383	5S_rRNA-related	5S_rRNA-related	yes	0.688056	68.13	A	0.152003	B	0.0395284	B	0.165898	B
511	chr12:112870778-112871150	chr12_14_Pseudo_CTC-	TRNAE42P	yes	-0.203533	0	B	-0.293731	B	0.178337	B	0.14439	B
512	chr12:121426727-121427097	chr12_7_tRNAAsp_GTC+	TRNAD15	yes	0.0848889	5.88	B	-0.0901978	B	-0.0443941	B	0.347923	B
513	chr12:123972104-123972475	chr12_13_tRNAAla_TGC-	TRNAA23	yes	3.87254	0	A	1.46713	A	0.843274	A	0.706953	A
514	chr12:123977694-123978065	chr12_12_tRNAAsp_GTC-	TRNAD16	yes	3.98075	0.49	A	0.813587	A	0.415037	B	0.995807	A
515	chr12:123978192-123978564	chr12_11_tRNAPhe_GAA-	TRNAF2	yes	4.019	0	A	1	A	0.762961	A	1.41777	A
516	chr12:123989996-123990341	chr12_10_tRNAAsp_GTC-	TRNAD19	yes	4.31992	0.35	A	1.36923	A	1.05889	A	2.10442	A
517	chr12:123990341-123990686	chr12_8_tRNAAla_TGC+	TRNAA32	yes	4.20716	0	A	1.28758	A	1.19794	A	1.86673	A
518	chr12:128282001-128282375	chr12_9_Pseudo_AAT+	TRNAI29P	yes	-0.215729	0	B	0.115477	B	-0.0824622	B	-0.125531	B
519	chr12:27734423-27734795	chr12_1_tRNALys_TTT+	TRNAK12	yes	0.133267	0	B	0.0901978	B	0.133267	B	0.175087	B
520	chr12:48497307-48497681	chr12_16_Pseudo_TTG-	TRNAQ46P	yes	-0.0901978	0	B	0.0430687	B	0.203533	B	0.0430687	B
521	chr12:54870265-54870646	chr12_2_tRNASer_CGA+	TRNAS11	yes	3.58812	0	A	0.860597	A	0.90182	A	1.05585	A
522	chr12:73137299-73137671	chr12_3_tRNAGln_CTG+	TRNAQ30	yes	-0.0458037	0	B	-0.0458037	B	0.0874628	B	0	B
523	chr12:94953780-94954151	chr12_4_tRNAAsp_GTC+	TRNAD10	yes	3.48308	0.13	A	1.06413	A	0.494765	B	1.23901	A
524	chr12:96014672-96015045	chr12_15_Pseudo_TTG-	TRNAQ47P	yes	-0.0901978	0	B	-0.0901978	B	-0.137504	B	-0.0443941	B
525	chr12:97421262-97421633	chr12_5_tRNAAsp_GTC+	TRNAD12	yes	3.8413	0	A	0.886343	A	0.862496	A	0.955606	B
526	chr12:97422011-97422382	chr12_6_tRNATrp_CCA+	TRNAW5	yes	3.70627	0	A	0.980891	A	0.90182	A	1.05585	A
527	chr13:108345795-108346317	MIR_SINE_MIR	MIR_SINE_MIR	no	2.42321	0	A	0.415037	B	0.165059	B	0.125531	B
528	chr13:30145951-30146324	chr13_7_tRNAAsn_GTT-	TRNAN7	yes	3.89401	0.58	A	1.22239	A	0.552541	B	1.2697	A
529	chr13:32128590-32129262	PDS5B_Intronic|AluSx	AluSx_SINE_Alu	no	1.7855	1.4	A	0.0740006	B	0.0740006	B	0	B
530	chr13:35537597-35537968	chr13_6_Pseudo_TTG-	TRNAQ50P	yes	0	0	B	0	B	0.0458037	B	-0.0473057	B
531	chr13:40532724-40533095	chr13_5_tRNAGlu_TTC-	TRNAE7	yes	3.1304	0	A	0.462972	B	0.345135	B	0.532014	B
532	chr13:40927911-40928282	chr13_4_tRNAGlu_CTC-	TRNAE4	yes	0.648528	0	A	-0.209453	B	0.0759489	B	0	B
533	chr13:44389912-44390283	chr13_3_tRNAGlu_TTC-	TRNAE20	yes	3.88594	0	A	1.26628	A	1.24998	A	1.51165	A
534	chr13:57356401-57356772	chr13_2_Pseudo_CTC-	TRNAE39P	yes	-0.133267	68.64	B	0	B	0	B	0.209635	B
535	chr13:93999755-94000127	chr13_1_tRNAPhe_GAA-	TRNAF6	yes	3.90087	0	A	1.59991	A	0.97728	A	1.82231	A
536	chr14:101853032-101853405	chr14_10_tRNAIle_AAT+	TRNAI15	yes	3.65063	0.61	A	0.978626	A	0.79518	A	1.27653	A
537	chr14:19880920-19881560	RNaseP_RNA	RPPH1_(RNaseP_RNA)	yes	3.80735	0	A	0.392317	B	0.426265	B	0.882643	A
538	chr14:20147185-20147556	chr14_23_tRNAPro_AGG-	TRNAP1	yes	3.65294	0.81	A	1.074	A	0.424498	B	0.831557	A
539	chr14:20147981-20148362	chr14_1_tRNALeu_AAG+	TRNAL1	yes	3.8413	2.54	A	1.05445	A	0.714598	A	0.724706	A
540	chr14:20151250-20151621	chr14_22_tRNAPro_AGG-	TRNAP2	yes	4.2716	0.28	A	1.1745	A	0.870717	A	0.744161	A
541	chr14:20151639-20152011	chr14_21_tRNAThr_TGT-	TRNAT2	yes	3.82018	0	A	1	A	0.70044	A	0.857981	A
542	chr14:20163219-20163600	chr14_2_tRNALeu_TAG+	TRNAL15	yes	4.35869	0	A	1.31259	A	1.31259	A	1.23563	A
543	chr14:20168280-20168658	tRNA-Tyr-TAC_tRNA_tRNA	tRNA-Tyr-TAC_tRNA_tRNA	yes	2.80735	0	A	0.040642	B	-0.0418202	B	-0.0418202	B
544	chr14:20169009-20169381	chr14_20_tRNAThr_TGT-	TRNAT12	yes	3.19377	0.72	A	0.560715	A	0.137504	B	0.0703893	B
545	chr14:20170855-20171226	chr14_3_tRNAPro_TGG+	TRNAP7	yes	3.86598	0	A	0.827163	A	0.878694	A	0.403356	B
546	chr14:20190948-20191341	chr14_19_tRNATyr_GTA_I-	TRNAY1	yes	3.04836	0	A	0.241008	B	-0.0331669	B	-0.10188	B
547	chr14:20195313-20195706	chr14_18_tRNATyr_GTA_I-	TRNAY2	yes	1.81816	0	A	-0.247928	B	-0.0780025	B	0.0740006	B
548	chr14:20197807-20198200	chr14_17_tRNATyr_GTA_I-	TRNAY3	yes	0.612977	0	A	-0.0874628	B	0.0418202	B	-0.0874628	B
549	chr14:20201041-20201434	chr14_16_tRNATyr_GTA_I-	TRNAY13	yes	3.21632	0	A	0.436099	B	0.467126	B	0.527247	B
550	chr14:20214868-20215249	chr14_15_Pseudo_TAG-	TRNAL40P	yes	-0.0848889	0	B	-0.0848889	B	-0.0848889	B	0	B
551	chr14:20219539-20219911	chr14_4_tRNAThr_TGT+	TRNAT20	yes	3.92871	0.48	A	1.06054	A	0.678072	A	0.36257	B
552	chr14:20221122-20221510	chr14_5_tRNATyr_GTA_I+	TRNAY14	yes	4.34272	0	A	1.17509	A	1.17509	A	1.42084	A
553	chr14:20221865-20222236	chr14_6_tRNAPro_TGG+	TRNAP17	yes	3.94218	0	A	1.04064	A	0.263034	B	1.25615	A
554	chr14:22468600-22468972	chr14_7_tRNAArg_ACG+	TRNAR21	yes	4.15171	1.17	A	1.06817	A	1.15433	A	1.63327	A
555	chr14:31306417-31306787	chr14_14_tRNAGlu_TTC-	TRNAE15	yes	-0.293731	0	B	-0.203533	B	0	B	0.0423646	B
556	chr14:31740851-31741257	U6-7	RNU6_(U6-7)	yes	1.95174	38.22	A	-0.0780025	B	0.0740006	B	0.0992902	B
557	chr14:31741970-31742376	U6-8	RNU6_(U6-8)	yes	4.07094	9.11	A	0.853159	A	0.660514	A	1.28817	A
558	chr14:49122897-49123496	RN7SL1|(SRP_RNA)	RN7SL1 (SRP_RNA)	yes	4.16189	30.07	A	1.51096	A	1.36457	A	1.20372	A
559	chr14:49389927-49390627	RN7SL3|(SRP_RNA)	RN7SL3 (SRP_RNA)	yes	1.8893	41.67	A	-0.174029	B	0.0951572	B	0.137007	B
560	chr14:49398868-49399467	RN7SL2|(SRP_RNA)	RN7SL2 (SRP_RNA)	yes	3.99799	32.4	A	1.09311	A	1.04731	A	0.969763	A
561	chr14:57776216-57776588	chr14_13_tRNALys_CTT-	TRNAK13	yes	3.86598	0	A	1.43812	A	0.928447	A	0.600393	B
562	chr14:72499282-72499653	chr14_8_tRNACys_GCA+	TRNAC24	yes	3.73013	3.16	A	0.518467	B	0.518467	B	0.606464	B
563	chr14:73125132-73125504	chr14_12_Pseudo_TTT-	TRNAK40P	yes	0.192645	0	B	0	B	-0.175087	B	-0.129283	B
564	chr14:77770441-77770813	chr14_11_Pseudo_CTA-		yes	-0.0874628	0	B	0.160465	B	-0.0874628	B	0.121991	B
565	chr14:88515045-88515417	chr14_9_tRNAAla_AGC+	TRNAA17	yes	2.9098	0	A	0.165059	B	0.241008	B	0.381871	B
566	chr15:23878324-23878695	chr15_11_tRNAGlu_TTC-	TRNAE11	yes	3.09245	0	A	0.719892	A	0.612977	A	0.807355	A
567	chr15:38673165-38673546	chr15_10_tRNASer_GCT-	TRNAS18	yes	3.97062	2.28	A	1.52154	A	1.17509	A	1.50797	A
568	chr15:43277946-43278317	chr15_9_tRNAHis_GTG-	TRNAH1	yes	4.00282	3.8	A	1.53916	A	1.12928	A	1.49719	A
569	chr15:43279753-43280124	chr15_8_tRNAHis_GTG-	TRNAH2	yes	3.90168	2.34	A	1.58496	A	1.3604	A	1.67726	A
570	chr15:43280491-43280862	chr15_1_tRNAHis_GTG+	TRNAH6	yes	3.80999	3.55	A	1.34395	A	0.943416	A	1.24338	A
571	chr15:63948304-63948675	chr15_7_tRNAGln_CTG-	TRNAQ24	yes	3.52203	0	A	1.2123	A	0.449803	B	0.525091	B
572	chr15:65919180-65919587	U6-1	RNU6_(U6-1)	yes	3.72311	9.82	A	0.889817	A	0.4975	B	0.788007	A
573	chr15:74461670-74462043	chr15_6_Pseudo_CTT-	TRNAK42P	yes	-0.129283	0	B	-0.129283	B	-0.0418202	B	-0.222392	B
574	chr15:76939809-76940181	chr15_2_tRNALys_CTT+	TRNAK6	yes	3.40336	0	A	0.976541	A	0.952694	A	0.600393	B
575	chr15:77823902-77824274	chr15_3_tRNACys_GCA+	TRNAC12	yes	2.63227	1.9	A	0.156119	B	0.118644	B	0.0136749	B
576	chr15:87679158-87679530	chr15_4_tRNAArg_TCG+	TRNAR22	yes	3.87254	0	A	1.10236	A	0.866733	A	1.3388	A
577	chr15:90055156-90055528	chr15_5_Pseudo_GTA-	TRNAY16P	yes	0.0874628	0	B	-0.0931094	B	0.129283	B	0.169925	B
578	chr16:14287101-14287472	chr16_15_tRNAThr_CGT+	TRNAT6	yes	4.07682	0	A	1.59991	A	1.33985	A	1.37504	A
579	chr16:22114383-22114764	chr16_27_tRNALeu_TAG-	TRNAL7	yes	3.53374	0	A	1.01668	A	0.913585	A	1.14359	A
580	chr16:22215812-22216193	chr16_16_tRNALeu_AAG+	TRNAL27	yes	3.64992	2.73	A	1.17834	A	0.796467	A	1.08209	A
581	chr16:22217034-22217734	POLR3E_Intronic|MIR_repeat	MIR_SINE_MIR	yes	4.06793	0	A	1.04064	A	1.02046	A	0.455679	B
582	chr16:29258669-29259410	RUNDC2C_Intronic|AluSg	AluSg_SINE_Alu	no	1.30875	30.73	A	-0.249978	B	-0.211504	B	0.136447	B
583	chr16:3140526-3140898	chr16_1_tRNAArg_CCG+	TRNAR19	yes	3.98185	0	A	1.1745	A	1.09954	A	1.40988	A
584	chr16:3142460-3142791	chr16_33_Pseudo_AGG-	TRNAP24P	yes	2.63472	0	A	0.559427	A	0.211504	B	0.961526	A
585	chr16:3142792-3143124	chr16_2_tRNAArg_CCT+	TRNAR18	yes	3.83825	0	A	1.27753	A	0.683526	A	1.27753	A
586	chr16:3147257-3147629	chr16_32_tRNALys_CTT-	TRNAK9	yes	3.60433	0	A	0.697437	A	0.767827	A	0.67319	A
587	chr16:3148774-3149145	chr16_3_tRNAPro_TGG+	TRNAP16	yes	2.89907	0	A	0.375509	B	0.434403	B	0.133954	B
588	chr16:3150237-3150631	chr16_4_tRNAPro_AGG_I+	TRNAP5	yes	0.241008	4.73	B	0.0848889	B	0.125531	B	0.125531	B
589	chr16:3154790-3155162	chr16_5_tRNALys_CTT+	TRNAK15	yes	0.165059	0	B	0.0430687	B	0.0430687	B	0.241008	B
590	chr16:3160812-3161182	chr16_31_Pseudo_TGG-	TRNAP26P	yes	0.247928	0	B	0.0443941	B	0	B	-0.0458037	B
591	chr16:3161900-3162271	chr16_6_tRNAPro_CGG+	TRNAP12	yes	3.46352	0	A	0.491853	B	0.491853	B	0.539159	B
592	chr16:3165543-3165915	chr16_7_tRNALys_CTT+	TRNAK21	yes	3.53766	0	A	0.746243	A	0.630766	A	0.71256	A
593	chr16:3170406-3170778	chr16_30_tRNALys_CTT-	TRNAK24	yes	2.88264	0	A	0	B	-0.234465	B	0.584963	B
594	chr16:3172486-3172857	chr16_29_tRNAPro_AGG-	TRNAP9	yes	3.34529	1.43	A	0.633218	A	0.192645	B	0.645033	B
595	chr16:3173984-3174355	chr16_28_tRNAPro_TGG-	TRNAP19	yes	3.35755	21.15	A	0.688056	A	0.712718	A	0.600904	B
596	chr16:3177945-3178316	chr16_8_tRNAPro_TGG+	TRNAP21	yes	3.04439	30.54	A	0.61471	A	0.584963	A	0.446256	B
597	chr16:3179485-3179856	chr16_9_tRNAPro_AGG+	TRNAP18	yes	3.86673	1.44	A	1.02106	A	0.584963	A	0.992022	A
598	chr16:3181352-3181724	chr16_10_tRNALys_CTT+	TRNAK26	yes	3.70677	0	A	0.936806	A	0.678072	A	0.847997	A
599	chr16:3181840-3182211	chr16_11_tRNAPro_AGG+	TRNAP20	yes	3.75192	0.46	A	0.712718	A	0.530515	B	0.737896	A
600	chr16:3183769-3184141	chr16_12_tRNAArg_CCT+	TRNAR23	yes	1.40336	0	A	0.293731	B	0.215729	B	0.367732	B
601	chr16:3186004-3186376	chr16_13_Pseudo_CTT+	TRNAK37P	yes	2.03449	0	A	0.331206	B	0.255257	B	0.0901978	B
602	chr16:3359664-3360035	chr16_14_tRNAGln_TTG+	TRNAQ31	yes	0	0	B	-0.0430687	B	-0.0430687	B	-0.133267	B
603	chr16:55891214-55891596	chr16_17_tRNALeu_CAG+	TRNAL11	yes	3.64263	2.19	A	1.06012	A	0.785261	A	1.17861	A
604	chr16:55891743-55892125	chr16_26_tRNALeu_CAG-	TRNAL13	yes	3.99484	2.32	A	1.37851	A	1.06054	A	1.60392	A
605	chr16:626587-626957	chr16_34_tRNAGly_CCC-	TRNAG4	yes	3.7605	0.06	A	1.10962	A	0.424498	B	1.20328	A
606	chr16:69369465-69369835	chr16_25_tRNAGly_GCC-	TRNAG5	yes	2.77083	0	A	-0.0740006	B	0.378512	B	-0.0551416	B
607	chr16:69370293-69370663	chr16_24_tRNAGly_GCC-	TRNAG6	yes	3.56264	0.8	A	0.818162	A	0.634716	A	0.816529	B
608	chr16:69379948-69380318	chr16_18_tRNAGly_GCC+	TRNAG16	yes	1.21573	0	A	0.215729	B	0.0901978	B	0.438121	B
609	chr16:69380761-69381131	chr16_19_tRNAGly_GCC+	TRNAG20	yes	2.42951	2.46	A	0.255257	B	0.215729	B	0.58261	B
610	chr16:70017747-70018119	chr16_20_tRNAMet_CAT+	TRNAM9	yes	3.49791	0	A	0.434403	B	0.405256	B	0.597902	B
611	chr16:70282241-70282614	chr16_21_tRNAGln_CTG+	TRNAQ28	yes	-0.341037	0	B	-0.0780025	B	-0.341037	B	-0.339772	B
612	chr16:72069567-72069939	chr16_23_tRNALys_TTT-	TRNAK17	yes	1.99159	3.45	A	-0.25634	B	-0.140863	B	-0.211252	B
613	chr16:85974979-85975351	chr16_22_tRNAMet_CAT-	TRNAM13	yes	3.4975	0	A	0.584963	A	0.640458	A	1.10236	A
614	chr16:9044013-9044713	MIRb_SINE_MIR	MIRb_SINE_MIR	yes	1.87801	0	A	0.182864	B	0.375509	B	0.345135	B
615	chr17:15349260-15349633	chr17_11_tRNASup_CTA+	TRNASUP3	yes	0	4.39	B	-0.0395284	B	-0.255257	B	0.354402	B
616	chr17:17804028-17804615	TOM1L2_Intronic	MIRb_SINE_MIR	no	2.2854	0	A	0.584963	A	0.137504	B	-0.112475	B
617	chr17:17804084-17804826	AluJb_SINE_Alu	AluJb_SINE_Alu	yes	2.18107	0	A	0.551015	A	0.158698	B	0	B
618	chr17:19351936-19352307	chr17_12_tRNATrp_CCA+	TRNAW7	yes	3.47721	0	A	0.949959	A	0.649093	A	1.34792	A
619	chr17:19447029-19447400	chr17_33_Pseudo_TTG-	TRNAQ41P	yes	0.0848889	2.41	B	-0.0443941	B	0.0848889	B	0.20637	B
620	chr17:19704617-19704987	chr17_13_tRNAGly_CCC+	TRNAG26	yes	0.0848889	0	B	0.203533	B	-0.0443941	B	0	B
621	chr17:21952156-21952524	chr17_32_Pseudo_TGA-	TRNAS30P	yes	-0.165059	0	B	-0.255257	B	-0.165059	B	-0.121991	B
622	chr17:24302625-24303024	HTR015644.17.711(-)|+|chr17:24302800-24303200|24302825|34	HTR015644.17.711	no	2.17509	0	A	0.438121	B	0.175087	B	0.630766	B
623	chr17:26901063-26901434	chr17_14_tRNAThr_CGT+	TRNAT10	yes	3.75174	0	A	1.14136	A	0.4975	B	0.866733	A
624	chr17:32511009-32511456	SRP_RNA-related	AluJo_SINE_Alu	no	1.84549	0	A	0.169925	B	0.285402	B	0.129283	B
625	chr17:34161410-34161783	chr17_31_tRNAAsn_GTT-	TRNAN17	yes	3.47249	0.59	A	0.744161	A	0.584963	A	1.09311	A
626	chr17:34243351-34243722	chr17_30_tRNACys_GCA-	TRNAC1	yes	0.827163	44.57	A	0.175087	B	0.133267	B	0.255257	B
627	chr17:34271313-34271684	chr17_29_tRNACys_GCA-	TRNAC5	yes	1.67557	0	A	-0.0824622	B	-0.263034	B	-0.040642	B
628	chr17:34277274-34277645	chr17_15_tRNACys_GCA+	TRNAC7	yes	3.83221	0.73	A	1.19994	A	0.790547	A	1.03752	A
629	chr17:34278921-34279292	chr17_28_tRNACys_GCA-	TRNAC9	yes	3.67596	0	A	1.10852	A	0.807355	A	1.26679	A
630	chr17:34563363-34563734	chr17_27_tRNACys_GCA-	TRNAC29	yes	3.64829	0.8	A	1.03653	A	0.714598	A	1.29881	A
631	chr17:34564120-34564491	chr17_26_tRNACys_GCA-	TRNAC30	yes	3.70044	1.75	A	1.12102	A	0.510962	B	1.05257	A
632	chr17:35526929-35527302	chr17_25_tRNASeC_TCA-	TRNAU3	yes	0	1.53	B	0.285402	B	0.209453	B	-0.0270202	B
633	chr17:44624739-44625110	chr17_16_tRNAGln_TTG+	TRNAQ2	yes	3.9349	0	A	1.52725	A	0.934905	A	1.59904	A
634	chr17:56218225-56218595	chr17_17_tRNASup_TTA+	TRNASUP1	yes	0.293731	0	B	0	B	0.0458037	B	0.133267	B
635	chr17:59957230-59957603	chr17_24_tRNAThr_AGT-	TRNAT22	yes	-0.192645	20.42	B	-0.112475	B	-0.0365259	B	-0.117235	B
636	chr17:63446325-63446697	chr17_23_tRNAArg_CCG-		yes	3.59887	0	A	0.74366	A	0.504473	B	0.802554	A
637	chr17:63902402-63902776	chr17_22_tRNAUndet_???-		yes	0.121991	0	B	-0.0874628	B	0.160465	B	0.197939	B
638	chr17:70541446-70541818	chr17_18_tRNAArg_CCT+	TRNAR8	yes	3.7252	0	A	1.1375	A	0.887525	A	1.3147	A
639	chr17:70541971-70542343	chr17_21_tRNAArg_CCT-	TRNAR20	yes	3.50533	0	A	0.530515	A	0.552541	B	0.891851	A
640	chr17:70542653-70543025	chr17_19_tRNAArg_TCG+	TRNAR25	yes	3.9432	0	A	1.4517	A	1.25239	A	1.3388	A
641	chr17:7465032-7465400	chr17_1_Pseudo_???+		yes	0	6.25	B	-0.255257	B	-0.0801703	B	-0.112592	B
642	chr17:78045736-78046107	chr17_20_tRNAMet_CAT-	TRNAM14	yes	3.54344	0.23	A	1.03037	A	0.785261	A	0.98263	A
643	chr17:7963048-7963420	chr17_2_tRNALys_TTT+	TRNAK1	yes	4.06465	0.51	A	1.18057	A	0.975752	A	1.37233	A
644	chr17:7963645-7964016	chr17_3_tRNAGln_CTG+	TRNAQ1	yes	3.55923	0	A	1.08489	A	0.241008	B	0.977974	A
645	chr17:7964207-7964588	chr17_42_tRNALeu_TAG-	TRNAL2	yes	3.69727	0	A	1	A	0.824913	A	0.652077	A
646	chr17:7964818-7965205	chr17_4_tRNAArg_TCT_I+	TRNAR1	yes	3.31133	0	A	0.397335	B	0.342888	B	0.871267	A
647	chr17:7969639-7970009	chr17_5_tRNAGly_GCC+	TRNAG2	yes	3.82597	0	A	0.838249	A	0.788496	A	1.26711	A
648	chr17:7982774-7983155	chr17_41_tRNASer_CGA-	TRNAS6	yes	3.70559	0.05	A	0.74366	A	0.783189	A	0.68226	A
649	chr17:7983345-7983718	chr17_40_tRNAThr_AGT-	TRNAT3	yes	3.85244	0	A	0.736966	A	0.662965	A	1.38466	A
650	chr17:8030251-8030622	chr17_6_tRNATrp_CCA+	TRNAW3	yes	3.49506	0	A	0.632268	A	0.405992	B	1.31107	A
651	chr17:8030759-8031096	chr17_7_tRNASer_GCT+	TRNAS23	yes	3.88613	1.65	A	1.60768	A	1.44057	A	1.9667	A
652	chr17:8031097-8031426	chr17_8_tRNAThr_AGT+	TRNAT8	yes	4.19039	0.4	A	1.67807	A	1	A	1.81323	A
653	chr17:8031486-8031859	chr17_9_tRNAIle_AAT+	TRNAI23	yes	4.32673	0.64	A	1.45066	A	1.34104	A	1.40357	A
654	chr17:8064762-8065133	chr17_39_tRNATrp_CCA-	TRNAW4	yes	3.72022	0	A	1.05445	A	0.645335	A	0.967263	A
655	chr17:8065441-8065812	chr17_10_tRNAGly_TCC+	TRNAG18	yes	3.62902	0	A	0.966053	A	0.703018	A	0.74366	A
656	chr17:8066131-8066502	chr17_38_tRNAAsp_GTC-	TRNAD17	yes	3.79181	0	A	1.10434	A	0.827819	A	1.3114	A
657	chr17:8066726-8067097	chr17_37_tRNAPro_CGG-	TRNAP8	yes	3.97358	0	A	1.0902	A	0.928447	A	1.94667	A
658	chr17:8070128-8070501	chr17_36_tRNAThr_AGT-	TRNAT9	yes	3.93707	0.2	A	1.10188	A	0.573185	A	1.15024	A
659	chr17:8070503-8070884	chr17_35_tRNASer_AGA-	TRNAS14	yes	3.91126	1.55	A	1.03242	A	0.690316	A	1.04836	A
660	chr17:8070884-8071257	chr17_34_tRNAIle_AAT-	TRNAI24	yes	3.5518	0	A	0.862496	A	0.628031	A	0.983512	A
661	chr18:41355783-41356300	MIRb_SINE_MIR	MIRb_SINE_MIR	no	2.52725	0	A	0.467126	B	0.234465	B	0.338802	B
662	chr18:41553599-41553970	chr18_1_tRNAGlu_CTC+	TRNAE25	yes	-0.0848889	0	B	-0.0848889	B	0.0801703	B	-0.21939	B
663	chr18:41923119-41923491	chr18_4_tRNALys_CTT-	TRNAK4	yes	0	0	B	-0.0458037	B	0.247928	B	0.321928	B
664	chr18:53496702-53497049	chr18_2_Pseudo_TCC+	TRNAG33P	yes	0	100	B	0.222392	B	0.0473057	B	0.180572	B
665	chr18:53497049-53497396	chr18_3_Pseudo_TCC+	TRNAG35P	yes	0.0473057	63.21	B	0.0931094	B	0.0473057	B	0.0931094	B
666	chr19:1334211-1334497	chr19_14_tRNAPhe_GAA-	TRNAF10	yes	3.99537	0.82	A	1.54749	A	1.4011	A	1.82834	A
667	chr19:1334498-1334785	chr19_1_tRNAAsn_GTT+	TRNAN20	yes	3.56533	0.59	A	1.19994	A	0.91983	A	1.58929	A
668	chr19:19713057-19713427	chr19_3_tRNALys_TTT+	TRNAK7	yes	0.392317	0	B	-0.0458037	B	-0.0931094	B	-0.0931094	B
669	chr19:38359653-38360026	chr19_4_tRNAThr_AGT+	TRNAT4	yes	3.69061	0.29	A	1.23447	A	0.889817	A	0.693897	A
670	chr19:40758440-40758812	chr19_5_tRNALys_CTT+	TRNAK28	yes	0.175087	0	B	0.133267	B	0.331206	B	0.0901978	B
671	chr19:40803150-40803520	chr19_11_Pseudo_???-		yes	-0.0901978	0	B	0	B	0	B	0.203533	B
672	chr19:44594498-44594890	chr19_10_tRNAIle_TAT_I-	TRNAI18	yes	3.49643	0	A	0.514573	B	0.455679	B	1.1375	A
673	chr19:44715175-44715574	AluJb_SINE_Alu|+|chr19:44715200-44715600|44715375|41	AluJb_SINE_Alu	no	1.32971	0	A	0.0759489	B	0.0759489	B	-0.0395284	B
674	chr19:46439832-46440204	chr19_9_Pseudo_TTT-	TRNAK38P	yes	0.169925	0	B	0	B	0.392317	B	0.247928	B
675	chr19:4674932-4675303	chr19_2_tRNAGly_TCC+	TRNAG3	yes	3.82288	0	A	1.08489	A	0.977974	A	0.813587	A
676	chr19:4675497-4675869	chr19_13_tRNAVal_CAC-	TRNAV32	yes	3.53294	0	A	1.12102	A	0.632268	A	0.536053	B
677	chr19:50673550-50673935	chr19_8_tRNASeC(e)_TCA-	TRNAU1	yes	3.79941	0	A	0.943416	A	0.547488	B	0.780687	A
678	chr19:53102476-53103176	SNAR-A12|SNAR-A13	SNAR-A12|SNAR-A13	yes	0.172181	100	B	-0.421827	B	-0.195551	B	-0.0330066	B
679	chr19:53113222-53113922	SNAR-A1|SNAR-A2	SNAR-A1|SNAR-A2	yes	0.253757	100	B	-0.530515	B	-0.331206	B	-0.145352	B
680	chr19:53118534-53119234	SNAR-A3-A11|SNAR-A14	SNAR-A3-A11|SNAR-A14	yes	0.109229	95.4	B	-0.720846	B	-0.26628	B	-0.0232453	B
681	chr19:53128979-53129679	SNAR-A1|SNAR-A2	SNAR-A1|SNAR-A2	yes	0.199309	100	B	-0.532495	B	-0.317482	B	-0.181543	B
682	chr19:53139720-53140420	SNAR-A12|SNAR-A13	SNAR-A12|SNAR-A13	yes	0.0919225	100	B	-0.440573	B	-0.247928	B	-0.0870897	B
683	chr19:54729595-54729967	chr19_7_tRNALys_TTT-	TRNAK32	yes	0.447459	0	B	0.241008	B	0	B	-0.137504	B
684	chr19:55287276-55287976	SNAR-A3-A11|SNAR-A14	SNAR-A3-A11|SNAR-A14	yes	0.236606	100	B	-0.825321	B	-0.354431	B	-0.158571	B
685	chr19:55292614-55293314	SNAR-A3-A11|SNAR-A14	SNAR-A3-A11|SNAR-A14	yes	0.179821	100	B	-0.937536	B	-0.498251	B	-0.217237	B
686	chr19:55295678-55296378	SNAR-A3-A11|SNAR-A14	SNAR-A3-A11|SNAR-A14	yes	0.179821	100	B	-0.937536	B	-0.498251	B	-0.217237	B
687	chr19:55298774-55299474	SNAR-A3-A11|SNAR-A14	SNAR-A3-A11|SNAR-A14	yes	0.18133	100	B	-0.949374	B	-0.503574	B	-0.253219	B
688	chr19:55301834-55302534	SNAR-A3-A11|SNAR-A14	SNAR-A3-A11|SNAR-A14	yes	0.297681	100	B	-0.752072	B	-0.375509	B	-0.119499	B
689	chr19:55307194-55307894	SNAR-A3-A11|SNAR-A14	SNAR-A3-A11|SNAR-A14	yes	0.312787	100	B	-0.736966	B	-0.380031	B	-0.119986	B
690	chr19:55312535-55313235	SNAR-A3-A11|SNAR-A14	SNAR-A3-A11|SNAR-A14	yes	0.309855	99.31	B	-0.777608	B	-0.375509	B	-0.151208	B
691	chr19:55317894-55318594	SNAR-A3-A11|SNAR-A14	SNAR-A3-A11|SNAR-A14	yes	0.331206	100	B	-0.731804	B	-0.31034	B	-0.149073	B
692	chr19:55323214-55323914	SNAR-A3-A11|SNAR-A14	SNAR-A3-A11|SNAR-A14	yes	0.315776	100	B	-0.747234	B	-0.32577	B	-0.138439	B
693	chr19:55332054-55332453	Alu_SINE_Alu|+|chr19:55332000-55332400|55332254|32	Alu_SINE_Alu	no	0.745817	51.33	A	-0.437405	B	-0.349942	B	0.00559525	B
694	chr19:57117058-57117430	chr19_6_tRNALys_CTT-	TRNAK30	yes	0.0901978	0	B	0.215729	B	0.133267	B	0.31259	B
695	chr19:844333-844740	U6-9	RNU6_(U6-9)	yes	3.57225	10.93	A	0.941897	A	0.211504	B	0.675872	A
696	chr19:9011206-9011578	chr19_12_Pseudo_TTG-	TRNAQ45P	yes	0.0443941	0	B	0.285402	B	0	B	0.0874628	B
697	chr19:972370-972777	U6-2	RNU6_(U6-2)	yes	4.13443	7.95	A	1.24793	A	1.08746	A	1.05977	A
698	chr20:13918320-13918691	chr20_7_Pseudo_CTC-	TRNAE43P	yes	0	0	B	-0.0443941	B	0	B	-0.0443941	B
699	chr20:17802992-17803369	chr20_1_tRNAGln_CTG+	TRNAQ23	yes	1.05889	0	A	0.0780025	B	0.0780025	B	0	B
700	chr20:29552214-29552585	chr20_2_Pseudo_AGA+	TRNAS29P	yes	0.125531	0.34	B	0	B	0.0430687	B	0.0848889	B
701	chr20:35385921-35386320	AluJo_SINE_Alu|+|chr20:35386000-35386400|35386121|50	AluJo_SINE_Alu	no	2.27753	0	A	0.313158	B	0.0848889	B	0.165059	B
702	chr20:43384265-43384637	chr20_3_Pseudo_CAC+	TRNAV33P	yes	0.115477	0.82	B	-0.125531	B	-0.263034	B	0.00568603	B
703	chr20:48385599-48385980	chr20_6_tRNALeu_AAG-	TRNAL39	yes	-0.289507	0	B	-0.289507	B	-0.289507	B	-0.249978	B
704	chr20:50651595-50651972	chr20_5_Pseudo_AAT-	TRNAI30P	yes	-0.175087	0	B	0.228269	B	-0.0418202	B	-0.0848889	B
705	chr20:55366685-55367059	chr20_4_Pseudo_TAA-	TRNAL42P	yes	-0.115477	0	B	-0.0759489	B	-0.115477	B	-0.378512	B
706	chr20:6675357-6675922	MIR_SINE_MIR	MIR_SINE_MIR	no	1.98185	0	A	-0.0365259	B	0	B	-0.192645	B
707	chr21:14848237-14848607	chr21_1_tRNASup_TTA+	TRNASUP2	yes	0.209453	0	B	0.0443941	B	0.0874628	B	-0.0931094	B
708	chr21:17748828-17749198	chr21_2_tRNAGly_GCC-	TRNAG27	yes	3.4132	1.99	A	0.594744	A	0.267933	B	0.631145	B
709	chr22:35915316-35921603	MER41B-int_LTR_ERV1	MER41B-int_LTR_ERV1	yes	1.30666	0.29	A	-0.194816	B	0.22456	B	-0.247928	B
710	chr22:42877720-42878105	chr22_1_tRNASeC(e)_TCA+	TRNAU2	yes	0.169925	18.47	B	0.0443941	B	0.169925	B	0.0583263	B
711	chrX:18602800-18603172	chrX_4_tRNAVal_TAC-	TRNAV19	yes	3.33744	0	A	0.721284	A	0.182864	B	0.597902	B
712	chrX:3766268-3766641	chrX_7_tRNAIle_GAT-		yes	-0.0931094	100	B	-0.0458037	B	0	B	-0.0151069	B
713	chrX:3804692-3805065	chrX_6_tRNAIle_GAT-		yes	-0.133267	100	B	-0.133267	B	-0.0874628	B	-0.0142139	B
714	chrX:3843121-3843494	chrX_5_tRNAIle_GAT-		yes	-0.133267	100	B	-0.133267	B	-0.0874628	B	-0.0142139	B
715	chrX:47546865-47547264	LOR1-int_LTR_ERV1|+|chrX:47546800-47547200|47547065|40	tRNA-Gly-GGG_tRNA_tRNA	no	1.72128	0	A	0.0384741	B	0.0759489	B	0	B
716	chrX:51322702-51323073	chrX_3_Pseudo_CTC-	TRNAE37P	yes	-0.0430687	0	B	0.0824622	B	0	B	-0.180572	B
717	chrX:55223241-55223612	chrX_1_Pseudo_TTG+	TRNAQ40P	yes	-0.0901978	0	B	0	B	0.0430687	B	0.125531	B
718	chrX:55224330-55224704	chrX_2_tRNALeu_TAA-	TRNAL37	yes	-0.160465	0	B	-0.160465	B	-0.0780025	B	-0.293731	B
719	chrY:8299990-8300364	chrY_1_Pseudo_TTG-	TRNAQ35P	yes	0	0	B	0	B	0	B	0	B
Table S2. Loci occupied by pol III in IMR90 cells. All TRNA loci, whether or not significantly occupied by POLR3D, as well as all other loci significantly occupied by POLR3D, are listed. Column A attributes a number to each entry which is constant in all the sheets of the table. Column B indicates chromosomal locations with links to the UCSC genome browser. Column C lists genome annotations and c…

## Sheet: TRNA
					Scores: log2((IP tag counts +30)/(Input tag counts+30))
Number	Locus position with link (NCBI36/hg18)	Locus annotation	HUGO nomenclature	In Canella et al. 2010?	POLR3D (cut off = 0.585)	POLR3D % score from tags with multiple matches	POLR3D score Below (B) or Above (A) cutoff (0.585)	POLR3G (cut off = 0.519)	POLR3G score Below (B) or Above (A) cutoff (0.519)	POLR3GL (cut off = 0.553)	POLR3GL score Below (B) or Above (A) cutoff (0.553)	BDP1	BDP1 score Below (B) or Above (A) cutoff (0.647)
115	chr1:16924498-16924870	chr1_1_Pseudo_CAC+	TRNAV35P	yes	0.301656	71.79	B	0.0655883	B	-0.140863	B	0.188445	B
3	chr1:142481401-142481774	chr1_10_tRNAAsn_GTT+		yes	-0.0430687	100	B	-0.0874628	B	0.121991	B	-0.0085115	B
47	chr1:147553833-147554204	chr1_100_Pseudo_GAA-	TRNAF16P	yes	1.92246	38.85	A	0.217591	B	0	B	0.0655883	B
46	chr1:147550977-147551350	chr1_101_tRNAAsn_GTT-		yes	0.449803	45.88	B	0.197037	B	-0.0721498	B	0.328949	B
45	chr1:147545259-147545631	chr1_102_Pseudo_TTC-	TRNAE34P	yes	0.394279	38.18	B	0.330149	B	0.192645	B	0.174498	B
44	chr1:147497044-147497417	chr1_103_tRNAAsn_GTT-		yes	1.80735	0	A	-0.277534	B	-0.0365259	B	-0.234465	B
43	chr1:147478422-147478795	chr1_104_Pseudo_GTT-	TRNAN36P	yes	-0.0848889	0	B	-0.0848889	B	-0.0418202	B	-0.129283	B
41	chr1:147428102-147428473	chr1_105_Pseudo_TTC-	TRNAE32P	yes	0.0901978	0	B	0.0901978	B	0.175087	B	0.175087	B
40	chr1:147422302-147422673	chr1_106_tRNAHis_GTG-	TRNAH11	yes	0.0901978	0	B	0.293731	B	0.133267	B	-0.0473057	B
38	chr1:147026830-147027203	chr1_107_tRNAAsn_GTT-		yes	3.20387	97.94	A	0.36257	B	0.490326	B	0.554102	B
37	chr1:146864788-146865161	chr1_108_tRNAAsn_GTT-		yes	3.42626	68.22	A	0.540568	A	0.517848	B	0.977974	A
33	chr1:146317534-146317907	chr1_109_Pseudo_GTT-	TRNAN35P	yes	0.0458037	42.85	B	-0.0473057	B	0	B	0.154328	B
4	chr1:143012818-143013191	chr1_11_tRNAAsn_GTT+		yes	0.571157	100	B	-0.175087	B	-0.0418202	B	-0.0995357	B
30	chr1:146247504-146247875	chr1_110_Pseudo_TTC-	TRNAE30P	yes	2.15528	0	A	0.203533	B	0.277534	B	0.0430687	B
28	chr1:146241319-146241690	chr1_111_tRNAHis_GTG-	TRNAH10	yes	3.66025	100	A	1.08342	A	0.85561	A	0.63743	B
25	chr1:146203856-146204227	chr1_112_tRNAGln_CTG-		yes	2.84435	2.06	A	0.381871	B	0.0430687	B	0.381871	B
23	chr1:145987241-145987614	chr1_113_tRNAAsn_GTT-		yes	3.17991	100	A	0.61471	A	0.285402	B	0.785725	A
18	chr1:144943234-144943605	chr1_114_tRNAGln_CTG-		yes	0.703607	84.58	A	0.156119	B	0.156119	B	0.165338	B
17	chr1:144690241-144690614	chr1_115_tRNAAsn_GTT-		yes	3.17991	100	A	0.61471	A	0.285402	B	0.785725	A
14	chr1:144110440-144110811	chr1_116_tRNAGlu_CTC-	TRNAE5	yes	3.53051	0.81	A	0.95109	A	0.508147	B	1.31757	A
13	chr1:144109071-144109442	chr1_117_tRNAGly_TCC-	TRNAG7	yes	3.46975	0	A	0.658963	A	0.533432	B	0.347019	B
12	chr1:144108088-144108459	chr1_118_tRNAHis_GTG-	TRNAH4	yes	3.73306	1.59	A	1.09433	A	0.721284	A	1.39541	A
11	chr1:144106729-144107101	chr1_119_tRNALys_CTT-	TRNAK20	yes	3.81378	1.17	A	1.20945	A	1.08746	A	1.52826	A
6	chr1:143193047-143193420	chr1_12_tRNAAsn_GTT+		yes	0.263034	100	B	-0.175087	B	0	B	-0.0995357	B
9	chr1:144090527-144090898	chr1_120_tRNAGln_CTG-		yes	1.17688	81.05	A	-0.275634	B	0	B	-0.122683	B
8	chr1:143550643-143551014	chr1_121_tRNAGln_CTG-		yes	1.08964	90.82	A	-0.0374747	B	0.387023	B	0.00921853	B
7	chr1:143200050-143200423	chr1_122_tRNAAsn_GTT-		yes	-0.040642	100	B	-0.125531	B	0.115477	B	-0.0489096	B
5	chr1:143019821-143020194	chr1_123_tRNAAsn_GTT-		yes	-0.040642	100	B	-0.125531	B	0.152003	B	0.0511787	B
2	chr1:142454931-142455304	chr1_124_Pseudo_GTT-	TRNAN34P	yes	0.222392	17.64	B	0	B	0.0473057	B	0.201634	B
1	chr1:108297648-108298018	chr1_125_Pseudo_???-		yes	0.209453	0	B	-0.0458037	B	0.0443941	B	0	B
157	chr1:93754272-93754644	chr1_126_tRNACys_GCA-	TRNAC17	yes	1.02308	0	A	0.293731	B	0.255257	B	0.0547925	B
155	chr1:55195980-55196352	chr1_127_tRNALys_CTT-	TRNAK10	yes	0.203533	0	B	0.241008	B	0.0848889	B	0	B
118	chr1:17053337-17053708	chr1_128_Pseudo_CTG-		yes	0.203533	92.35	B	0.165059	B	0.381871	B	-0.113657	B
114	chr1:16878938-16879310	chr1_129_tRNAVal_CAC-	TRNAV13	yes	0.889817	92.56	A	-0.0430687	B	0.121991	B	0.0622843	B
10	chr1:144096936-144097311	chr1_13_tRNAAsn_GTT+		yes	0.247928	0	B	0.0874628	B	0.0874628	B	0.209453	B
113	chr1:16877203-16877573	chr1_130_tRNAGly_CCC-	TRNAG10	yes	3.52166	0.35	A	0.736966	A	0.277534	B	0.628031	B
112	chr1:16746597-16746969	chr1_131_Pseudo_CAC-	TRNAV34P	yes	2.70941	59.57	A	0.112475	B	0.112475	B	0.448758	B
111	chr1:16744871-16745241	chr1_132_tRNAGly_CCC-	TRNAG1	yes	3.40939	50.1	A	0.405992	B	0.292782	B	0.485427	B
110	chr1:16734211-16734582	chr1_133_tRNAGlu_TTC-	TRNAE1	yes	3.80145	41.08	A	0.824913	A	0.728698	A	1.33832	A
109	chr1:16731330-16731703	chr1_134_tRNAAsn_GTT-		yes	-0.160465	50	B	0.0374747	B	-0.160465	B	0.0919225	B
108	chr1:16719517-16719890	chr1_135_tRNAAsn_GTT-		yes	2.77083	1.76	A	0.201634	B	-0.0365259	B	0.432959	B
156	chr1:7912776-7913145	chr1_136_Pseudo_???-		yes	0	10.93	B	0.0384741	B	-0.121991	B	-0.253468	B
15	chr1:144652786-144653156	chr1_14_Pseudo_CCT+	TRNAR30P	yes	0	100	B	0	B	0	B	-0.0443941	B
16	chr1:144674511-144674882	chr1_15_tRNAGln_CTG+		yes	3.5325	100	A	0.836501	A	0.561879	A	0.584963	B
19	chr1:145011247-145011618	chr1_16_tRNAHis_GTG+	TRNAH7	yes	1.70044	0	A	0.247928	B	0.247928	B	0.369234	B
20	chr1:145016652-145017023	chr1_17_Pseudo_TTC+	TRNAE29P	yes	0	0	B	0.215729	B	0.175087	B	0.331206	B
21	chr1:145949765-145950135	chr1_18_Pseudo_CCT+	TRNAR31P	yes	0	100	B	0	B	0	B	-0.0443941	B
22	chr1:145971512-145971883	chr1_19_tRNAGln_CTG+		yes	3.5325	100	A	0.836501	A	0.561879	A	0.584963	B
116	chr1:16926217-16926587	chr1_2_tRNAGly_CCC+	TRNAG14	yes	2.49476	0	A	0.540568	A	0.510195	B	0.125531	B
24	chr1:146185503-146185876	chr1_20_tRNAAsn_ATT+	TRNAN26	yes	0.156119	0	B	0.0801703	B	0.296982	B	0.156119	B
27	chr1:146219945-146220316	chr1_21_tRNAHis_GTG+	TRNAH9	yes	3.71973	100	A	1.15381	A	0.906891	A	0.707819	A
31	chr1:146267411-146267782	chr1_22_tRNAGln_CTG+		yes	-0.165059	0	B	-0.0801703	B	0	B	-0.302563	B
32	chr1:146292163-146292534	chr1_23_Pseudo_CTG+		yes	2.40088	0	A	0.247928	B	0.285402	B	0.129283	B
34	chr1:146344011-146344384	chr1_24_tRNAAsn_GTT+		yes	-0.0430687	100	B	-0.0874628	B	0.121991	B	-0.0085115	B
35	chr1:146467279-146467652	chr1_25_tRNAAsn_GTT+		yes	3.77166	20.88	A	0.559427	A	0.452512	B	1.01886	A
36	chr1:146614589-146614962	chr1_26_tRNAAsn_GTT+		yes	3.82732	23.25	A	0.982298	A	0.642448	A	1.38391	A
39	chr1:147345838-147346209	chr1_27_Pseudo_CTG+		yes	0.040642	9.09	B	0.263034	B	0.0801703	B	-0.222392	B
42	chr1:147452599-147452970	chr1_28_tRNAGln_CTG+		yes	2.22497	3.36	A	-0.0365259	B	-0.234465	B	-0.0365259	B
51	chr1:147600746-147601114	chr1_29_tRNAGlu_CTC+	TRNAE13	yes	0	36	B	0.112475	B	0.0759489	B	-0.302563	B
119	chr1:17059130-17059502	chr1_3_Pseudo_CAC+	TRNAV36P	yes	2.90935	48.83	A	0.329308	B	0.174029	B	0.304561	B
53	chr1:147875083-147875456	chr1_30_tRNAAsn_GTT+		yes	-0.165059	100	B	-0.165059	B	0.112475	B	0.0498191	B
61	chr1:147986276-147986644	chr1_31_tRNAGlu_TTC+	TRNAE8	yes	0.040642	42.85	B	0.0801703	B	0.156119	B	0.040642	B
64	chr1:151910200-151910571	chr1_32_tRNAMet_CAT+	TRNAM3	yes	3.77259	0	A	0.943416	A	0.736966	A	1.01609	A
68	chr1:159657135-159657507	chr1_33_Pseudo_???+		yes	0.118644	4.1	B	-0.0418202	B	0	B	-0.222392	B
73	chr1:159677797-159678179	chr1_34_tRNALeu_CAG+	TRNAL5	yes	2.26894	99.3	A	-0.149378	B	0.0692627	B	0.52738	B
74	chr1:159679568-159679938	chr1_35_tRNAGly_GCC+	TRNAG15	yes	2.22551	100	A	-0.419903	B	0.0985638	B	0.230376	B
78	chr1:159685215-159685597	chr1_36_tRNALeu_CAG+	TRNAL6	yes	2.56986	100	A	-0.0931094	B	0.129283	B	0.757155	A
79	chr1:159686941-159687311	chr1_37_tRNAGly_GCC+	TRNAG21	yes	2.02594	100	A	-0.614346	B	-0.172837	B	0.0246961	B
83	chr1:159692596-159692978	chr1_38_tRNALeu_CAG+	TRNAL14	yes	2.65743	93.05	A	0.0515303	B	0.263034	B	0.81736	A
84	chr1:159694372-159694742	chr1_39_tRNAGly_GCC+	TRNAG23	yes	2.22551	100	A	-0.419903	B	0.0985638	B	0.230376	B
120	chr1:17060853-17061223	chr1_4_tRNAGly_CCC+	TRNAG28	yes	3.45615	59.12	A	0.432959	B	0.201634	B	0.57289	B
88	chr1:159700006-159700388	chr1_40_tRNALeu_CAG+	TRNAL30	yes	2.56986	100	A	-0.0931094	B	0.129283	B	0.757155	A
89	chr1:159701732-159702102	chr1_41_tRNAGly_GCC+	TRNAG25	yes	2.02594	100	A	-0.614346	B	-0.172837	B	0.0246961	B
93	chr1:159707387-159707769	chr1_42_tRNALeu_CAG+	TRNAL35	yes	2.56986	100	A	-0.0931094	B	0.129283	B	0.757155	A
94	chr1:159716830-159717200	chr1_43_tRNAGly_GCC+	TRNAG30	yes	0.0801703	0	B	0.228269	B	-0.222392	B	-0.0848889	B
95	chr1:159759409-159759780	chr1_44_Pseudo_GTC+	TRNAD20P	yes	0.255257	4.34	B	0.215729	B	0.0901978	B	0.255257	B
98	chr1:159767377-159767748	chr1_45_tRNAGly_TCC+	TRNAG24	yes	3.86224	5.04	A	1.08017	A	0.728698	A	0.986194	A
99	chr1:159768389-159768760	chr1_46_tRNAAsp_GTC+	TRNAD13	yes	2.1836	0	A	0.118644	B	-0.0418202	B	0	B
100	chr1:159776505-159776878	chr1_47_tRNAAsn_GTT+		yes	4.09011	3.03	A	1.30378	A	1.06609	A	1.21917	A
101	chr1:159841062-159841433	chr1_48_tRNAAsp_GTC+	TRNAD18	yes	-0.0473057	100	B	-0.0473057	B	0	B	-0.0473057	B
103	chr1:159848982-159849353	chr1_49_tRNAGlu_TTC+	TRNAE16	yes	0.928447	100	A	0.0458037	B	0.0458037	B	-0.0473057	B
121	chr1:17071515-17071886	chr1_5_tRNAGlu_TTC+	TRNAE2	yes	3.63941	41.12	A	0.597241	A	0.521953	B	1.1822	A
104	chr1:159857939-159858312	chr1_50_tRNAAsn_GTT+		yes	0.584963	100	B	0	B	0.0473057	B	0.0238467	B
105	chr1:163832624-163832996	chr1_51_Pseudo_CTT+	TRNAK36P	yes	-0.0395284	0	B	-0.121991	B	-0.209453	B	0.148099	B
106	chr1:165950436-165950807	chr1_52_tRNAPro_CGG+	TRNAP11	yes	4.11042	0	A	1.43134	A	0.862496	A	1.73697	A
125	chr1:176944511-176944883	chr1_53_Pseudo_???+		yes	0.040642	0	B	-0.222392	B	-0.222392	B	-0.0848889	B
127	chr1:202742128-202742500	chr1_54_tRNALys_TTT+	TRNAK11	yes	3.67587	0.24	A	1.01749	A	0.619728	A	0.33361	B
129	chr1:203709744-203710116	chr1_55_tRNALys_TTT+	TRNAK34	yes	0.209453	0	B	0.0443941	B	-0.0458037	B	0	B
131	chr1:220704820-220705192	chr1_56_tRNAThr_TGT+	TRNAT19	yes	3.70917	0	A	1.03747	A	0.610053	A	1.14439	A
150	chr1:236172335-236172706	chr1_57_Pseudo_TGG+	TRNAP27P	yes	-0.0430687	0	B	0	B	-0.0874628	B	-0.133267	B
152	chr1:247134527-247134926	chr1_58_tRNALeu_CAA_I+	TRNAL19	yes	4.06995	0	A	1.31451	A	0.904422	A	1.97199	A
153	chr1:247134926-247135291	chr1_59_tRNAGlu_CTC+	TRNAE24	yes	3.99202	0	A	0.843274	A	0.79518	A	1.2854	A
123	chr1:17074395-17074768	chr1_6_tRNAAsn_GTT+		yes	0.0347654	25	B	0.16601	B	-0.0356239	B	0.423808	B
151	chr1:236173429-236173803	chr1_60_Pseudo_TAA-	TRNAL45P	yes	0	0	B	0.0901978	B	-0.0473057	B	0.255257	B
130	chr1:205244627-205245003	chr1_61_Pseudo_TGG-	TRNAP23P	yes	0.426265	0	B	0.0874628	B	0.285402	B	0.0874628	B
128	chr1:202742631-202743003	chr1_62_tRNALys_TTT-	TRNAK16	yes	3.87992	0.73	A	1.20511	A	0.896164	A	1.30039	A
126	chr1:178450749-178451121	chr1_63_tRNAVal_AAC-	TRNAV30	yes	-0.25634	1.85	B	-0.296982	B	-0.472068	B	-0.407235	B
117	chr1:170424012-170424380	chr1_64_tRNAGlu_TTC-	TRNAE23	yes	0.0801703	0	B	-0.222392	B	0	B	-0.0418202	B
107	chr1:165951199-165951570	chr1_65_tRNAPro_AGG-	TRNAP4	yes	3.50027	0.61	A	0.90182	A	0.610053	A	1.26974	A
102	chr1:159848210-159848593	chr1_66_tRNALeu_CAA-	TRNAL3	yes	1.95561	77.57	A	-0.0901978	B	0.0848889	B	0.656046	B
97	chr1:159766606-159766988	chr1_67_tRNALeu_CAG-	TRNAL38	yes	3.63777	19.97	A	0.980891	A	1.03747	A	0.791427	A
96	chr1:159760111-159760481	chr1_68_tRNAGly_GCC-	TRNAG31	yes	3.73132	0.38	A	0.97728	A	0.78136	A	1.34739	A
92	chr1:159706679-159707050	chr1_69_tRNAAsp_GTC-	TRNAD11	yes	2.70589	100	A	0	B	0.278716	B	0.667813	A
124	chr1:17088609-17088982	chr1_7_tRNAAsn_GTT+		yes	3.27171	1.27	A	0.584963	A	0.395929	B	0.479993	B
91	chr1:159706028-159706392	chr1_70_tRNAGly_TCC-	TRNAG17	yes	2.62963	100	A	0.154723	B	0.481533	B	1.21029	A
90	chr1:159705663-159706027	chr1_71_tRNAGlu_CTC-	TRNAE22	yes	2.78222	100	A	0.325095	B	0.446402	B	1.11507	A
87	chr1:159699298-159699669	chr1_72_tRNAAsp_GTC-	TRNAD6	yes	2.74723	100	A	0	B	0.270648	B	0.732265	A
86	chr1:159698647-159699011	chr1_73_tRNAGly_TCC-	TRNAG13	yes	2.73853	100	A	0.334419	B	0.542527	B	1.08574	A
85	chr1:159698283-159698647	chr1_74_tRNAGlu_CTC-	TRNAE21	yes	3.06269	100	A	0.546488	A	0.68281	A	1.11936	A
82	chr1:159691888-159692259	chr1_75_tRNAAsp_GTC-	TRNAD5	yes	2.74723	100	A	0	B	0.270648	B	0.732265	A
81	chr1:159691237-159691601	chr1_76_tRNAGly_TCC-	TRNAG11	yes	2.62963	100	A	0.154723	B	0.481533	B	1.21029	A
80	chr1:159690872-159691236	chr1_77_tRNAGlu_CTC-	TRNAE18	yes	2.78222	100	A	0.325095	B	0.446402	B	1.11507	A
77	chr1:159684507-159684878	chr1_78_tRNAAsp_GTC-	TRNAD4	yes	2.74723	100	A	0	B	0.270648	B	0.732265	A
76	chr1:159683856-159684220	chr1_79_tRNAGly_TCC-	TRNAG9	yes	2.73853	100	A	0.334419	B	0.542527	B	1.08574	A
154	chr1:39742632-39743004	chr1_8_Pseudo_CTT+	TRNAK35P	yes	0.270089	22.53	B	0.160465	B	0.0824622	B	0.265054	B
75	chr1:159683492-159683856	chr1_80_tRNAGlu_CTC-	TRNAE14	yes	3.06269	100	A	0.546488	A	0.68281	A	1.11936	A
72	chr1:159677089-159677460	chr1_81_tRNAAsp_GTC-	TRNAD1	yes	2.87447	66.31	A	0.222392	B	0.481127	B	0.909428	A
71	chr1:159676435-159676806	chr1_82_tRNAGly_TCC-	TRNAG8	yes	3.00514	1.6	A	0.263034	B	0.296982	B	0.449656	B
70	chr1:159664341-159664714	chr1_83_tRNAAsn_GTT-		yes	3.45085	0.51	A	0.885829	A	0.204358	B	0.5281	B
69	chr1:159658357-159658728	chr1_84_tRNAGlu_TTC-	TRNAE12	yes	3.78773	3.18	A	0.744743	A	0.648528	A	1.22236	A
67	chr1:159635964-159636336	chr1_85_tRNAVal_CAC-	TRNAV29	yes	3.56635	0.56	A	1.07215	A	0.645335	A	0.957091	A
65	chr1:157377875-157378248	chr1_86_tRNAArg_TCT-	TRNAR16	yes	2.75489	0	A	-0.174029	B	-0.174029	B	0.471306	B
63	chr1:148283856-148284226	chr1_87_tRNAAla_AGC-	TRNAA16	yes	-0.0848889	0	B	-0.129283	B	-0.222392	B	0.156119	B
62	chr1:147994745-147995115	chr1_88_Pseudo_CCT-	TRNAR33P	yes	-0.0703893	14.28	B	-0.392317	B	-0.14439	B	-0.0703893	B
60	chr1:147978272-147978645	chr1_89_tRNAAsn_GTT-		yes	3.19265	23.97	A	0.598637	A	0.394279	B	0.652077	A
158	chr1:94085567-94085951	chr1_9_tRNAArg_TCT_I+	TRNAR15	yes	3.24607	0	A	0.964376	A	0.982298	A	1.15024	A
59	chr1:147950562-147950935	chr1_90_tRNAVal_CAC-	TRNAV25	yes	3.17812	29.85	A	0.802061	A	0.29956	B	1.07215	A
58	chr1:147946684-147947054	chr1_91_Pseudo_CCC-	TRNAG34P	yes	3.61798	47	A	1.27302	A	1.03953	A	1.1247	A
57	chr1:147939379-147939750	chr1_92_Pseudo_GAA-	TRNAF17P	yes	2.08989	43.44	A	0.296982	B	0.394279	B	0.36257	B
56	chr1:147936531-147936904	chr1_93_tRNAAsn_GTT-		yes	0.556393	58.2	B	-0.0430687	B	0	B	0.0622843	B
55	chr1:147930829-147931201	chr1_94_tRNAGlu_TTC-	TRNAE3	yes	0.148099	56.75	B	0.345135	B	0.0759489	B	0.0943274	B
54	chr1:147882091-147882464	chr1_95_tRNAAsn_GTT-		yes	0.543142	100	B	-0.175087	B	-0.0418202	B	-0.0418202	B
52	chr1:147609555-147609925	chr1_96_Pseudo_CCT-	TRNAR32P	yes	-0.0430687	38.46	B	0.0824622	B	0.0824622	B	0	B
50	chr1:147592746-147593119	chr1_97_tRNAAsn_GTT-		yes	2.34981	38.67	A	0.397335	B	-0.0721498	B	0.134301	B
49	chr1:147565029-147565401	chr1_98_tRNAVal_CAC-	TRNAV22	yes	3.51758	20.89	A	0.965235	A	0.652077	A	0.856965	A
48	chr1:147561140-147561510	chr1_99_tRNAVal_CAC-	TRNAV16	yes	3.6466	39.06	A	0.874469	A	0.797507	A	0.705715	A
481	chr10:22892435-22892807	chr10_1_Pseudo_GGG+	TRNAP22P	yes	0.129283	0	B	-0.0458037	B	-0.0458037	B	0.0874628	B
488	chr10:69194117-69194498	chr10_2_tRNASer_TGA+	TRNAS21	yes	3.62449	0	A	1.14543	A	0.788496	A	1.33065	A
485	chr10:34631272-34631639	chr10_3_Pseudo_CAA-	TRNAL44P	yes	0.118644	0	B	0.040642	B	0.118644	B	0	B
480	chr10:22558294-22558667	chr10_4_tRNAAsn_GTT-	TRNAN11	yes	3.66197	0.81	A	0.881356	A	0.706269	A	0.642843	B
479	chr10:20076464-20076838	chr10_5_Pseudo_CTG-	TRNAQ38P	yes	0.0874628	0	B	0.169925	B	0.247928	B	0.247928	B
487	chr10:5935530-5935902	chr10_6_tRNAVal_TAC-	TRNAV26	yes	1.73697	0	A	0.341037	B	0.222392	B	0.0931094	B
509	chr11:9253216-9253589	chr11_1_tRNALeu_CAA+	TRNAL36	yes	0.0443941	0	B	-0.0931094	B	0.0874628	B	0.0443941	B
489	chr11:108541099-108541480	chr11_10_tRNASer_AGA+	TRNAS26	yes	0.255257	0	B	0.505235	B	0	B	0.215729	B
490	chr11:121935715-121936087	chr11_11_tRNALys_TTT+	TRNAK27	yes	2.17991	3.44	A	0.209453	B	0.169925	B	0.169925	B
508	chr11:75624397-75624738	chr11_12_tRNAPro_TGG-	TRNAP14	yes	3.57023	0	A	0.792195	A	0.342888	B	1	A
502	chr11:59090279-59090651	chr11_13_tRNAPhe_GAA-	TRNAF11	yes	3.90689	0	A	1.40439	A	1.04182	A	0.234465	B
501	chr11:59084234-59084606	chr11_14_tRNALys_TTT-	TRNAK23	yes	3.79256	0.53	A	0.870717	A	0.824913	A	1.22239	A
500	chr11:59081396-59081768	chr11_15_tRNAPhe_GAA-	TRNAF1	yes	3.6389	0.35	A	0.915111	A	0.571157	A	0.302691	B
496	chr11:59074893-59075225	chr11_16_tRNAVal_TAC-	TRNAV23	yes	4.13262	0	A	1.46297	A	0.834941	A	1.75633	A
495	chr11:59074528-59074893	chr11_17_tRNAVal_TAC-	TRNAV11	yes	4.11473	0	A	1.3604	A	1.07595	A	0.899071	A
493	chr11:50190305-50190676	chr11_18_tRNAAla_TGC-	TRNAA25	yes	0.255257	0	B	0.255257	B	0.0901978	B	0.175087	B
492	chr11:45246626-45246999	chr11_19_tRNATrp_CCA-	TRNAW1	yes	0.0374747	0	B	-0.0780025	B	-0.293731	B	-0.160465	B
494	chr11:51216326-51216698	chr11_2_tRNALys_CTT+	TRNAK5	yes	-0.0473057	0	B	0	B	-0.0473057	B	-0.0473057	B
497	chr11:59075226-59075578	chr11_3_tRNAArg_TCT_I+	TRNAR14	yes	4.22159	0	A	1.40939	A	0.857981	A	1.64386	A
498	chr11:59075654-59076036	chr11_4_tRNALeu_TAA+	TRNAL23	yes	3.59724	0	A	0.758992	A	0.547488	B	0.29956	B
499	chr11:59080328-59080700	chr11_5_tRNALys_TTT+	TRNAK3	yes	3.71926	0	A	0.771731	A	0.342888	B	0.792195	A
503	chr11:60519934-60520303	chr11_6_Pseudo_TGC+	TRNAA45P	yes	0.169925	0	B	0.0874628	B	0.285402	B	0.0874628	B
504	chr11:63418193-63418561	chr11_7_Pseudo_CCT+	TRNAR34P	yes	0.255257	14.34	B	0.293731	B	0.175087	B	0.0458037	B
505	chr11:65872017-65872398	chr11_8_tRNASer_GCT+	TRNAS22	yes	3.86842	0	A	1.36678	A	0.68281	A	1.17834	A
507	chr11:75624055-75624396	chr11_9_tRNAPro_AGG+	TRNAP6	yes	3.71799	0.22	A	0.89812	A	0.540568	B	0.682675	A
519	chr12:27734423-27734795	chr12_1_tRNALys_TTT+	TRNAK12	yes	0.133267	0	B	0.0901978	B	0.133267	B	0.175087	B
516	chr12:123989996-123990341	chr12_10_tRNAAsp_GTC-	TRNAD19	yes	4.31992	0.35	A	1.36923	A	1.05889	A	2.10442	A
515	chr12:123978192-123978564	chr12_11_tRNAPhe_GAA-	TRNAF2	yes	4.019	0	A	1	A	0.762961	A	1.41777	A
514	chr12:123977694-123978065	chr12_12_tRNAAsp_GTC-	TRNAD16	yes	3.98075	0.49	A	0.813587	A	0.415037	B	0.995807	A
513	chr12:123972104-123972475	chr12_13_tRNAAla_TGC-	TRNAA23	yes	3.87254	0	A	1.46713	A	0.843274	A	0.706953	A
511	chr12:112870778-112871150	chr12_14_Pseudo_CTC-	TRNAE42P	yes	-0.203533	0	B	-0.293731	B	0.178337	B	0.14439	B
524	chr12:96014672-96015045	chr12_15_Pseudo_TTG-	TRNAQ47P	yes	-0.0901978	0	B	-0.0901978	B	-0.137504	B	-0.0443941	B
520	chr12:48497307-48497681	chr12_16_Pseudo_TTG-	TRNAQ46P	yes	-0.0901978	0	B	0.0430687	B	0.203533	B	0.0430687	B
521	chr12:54870265-54870646	chr12_2_tRNASer_CGA+	TRNAS11	yes	3.58812	0	A	0.860597	A	0.90182	A	1.05585	A
522	chr12:73137299-73137671	chr12_3_tRNAGln_CTG+	TRNAQ30	yes	-0.0458037	0	B	-0.0458037	B	0.0874628	B	0	B
523	chr12:94953780-94954151	chr12_4_tRNAAsp_GTC+	TRNAD10	yes	3.48308	0.13	A	1.06413	A	0.494765	B	1.23901	A
525	chr12:97421262-97421633	chr12_5_tRNAAsp_GTC+	TRNAD12	yes	3.8413	0	A	0.886343	A	0.862496	A	0.955606	B
526	chr12:97422011-97422382	chr12_6_tRNATrp_CCA+	TRNAW5	yes	3.70627	0	A	0.980891	A	0.90182	A	1.05585	A
512	chr12:121426727-121427097	chr12_7_tRNAAsp_GTC+	TRNAD15	yes	0.0848889	5.88	B	-0.0901978	B	-0.0443941	B	0.347923	B
517	chr12:123990341-123990686	chr12_8_tRNAAla_TGC+	TRNAA32	yes	4.20716	0	A	1.28758	A	1.19794	A	1.86673	A
518	chr12:128282001-128282375	chr12_9_Pseudo_AAT+	TRNAI29P	yes	-0.215729	0	B	0.115477	B	-0.0824622	B	-0.125531	B
535	chr13:93999755-94000127	chr13_1_tRNAPhe_GAA-	TRNAF6	yes	3.90087	0	A	1.59991	A	0.97728	A	1.82231	A
534	chr13:57356401-57356772	chr13_2_Pseudo_CTC-	TRNAE39P	yes	-0.133267	68.64	B	0	B	0	B	0.209635	B
533	chr13:44389912-44390283	chr13_3_tRNAGlu_TTC-	TRNAE20	yes	3.88594	0	A	1.26628	A	1.24998	A	1.51165	A
532	chr13:40927911-40928282	chr13_4_tRNAGlu_CTC-	TRNAE4	yes	0.648528	0	A	-0.209453	B	0.0759489	B	0	B
531	chr13:40532724-40533095	chr13_5_tRNAGlu_TTC-	TRNAE7	yes	3.1304	0	A	0.462972	B	0.345135	B	0.532014	B
530	chr13:35537597-35537968	chr13_6_Pseudo_TTG-	TRNAQ50P	yes	0	0	B	0	B	0.0458037	B	-0.0473057	B
528	chr13:30145951-30146324	chr13_7_tRNAAsn_GTT-	TRNAN7	yes	3.89401	0.58	A	1.22239	A	0.552541	B	1.2697	A
539	chr14:20147981-20148362	chr14_1_tRNALeu_AAG+	TRNAL1	yes	3.8413	2.54	A	1.05445	A	0.714598	A	0.724706	A
536	chr14:101853032-101853405	chr14_10_tRNAIle_AAT+	TRNAI15	yes	3.65063	0.61	A	0.978626	A	0.79518	A	1.27653	A
564	chr14:77770441-77770813	chr14_11_Pseudo_CTA-		yes	-0.0874628	0	B	0.160465	B	-0.0874628	B	0.121991	B
563	chr14:73125132-73125504	chr14_12_Pseudo_TTT-	TRNAK40P	yes	0.192645	0	B	0	B	-0.175087	B	-0.129283	B
561	chr14:57776216-57776588	chr14_13_tRNALys_CTT-	TRNAK13	yes	3.86598	0	A	1.43812	A	0.928447	A	0.600393	B
555	chr14:31306417-31306787	chr14_14_tRNAGlu_TTC-	TRNAE15	yes	-0.293731	0	B	-0.203533	B	0	B	0.0423646	B
550	chr14:20214868-20215249	chr14_15_Pseudo_TAG-	TRNAL40P	yes	-0.0848889	0	B	-0.0848889	B	-0.0848889	B	0	B
549	chr14:20201041-20201434	chr14_16_tRNATyr_GTA_I-	TRNAY13	yes	3.21632	0	A	0.436099	B	0.467126	B	0.527247	B
548	chr14:20197807-20198200	chr14_17_tRNATyr_GTA_I-	TRNAY3	yes	0.612977	0	A	-0.0874628	B	0.0418202	B	-0.0874628	B
547	chr14:20195313-20195706	chr14_18_tRNATyr_GTA_I-	TRNAY2	yes	1.81816	0	A	-0.247928	B	-0.0780025	B	0.0740006	B
546	chr14:20190948-20191341	chr14_19_tRNATyr_GTA_I-	TRNAY1	yes	3.04836	0	A	0.241008	B	-0.0331669	B	-0.10188	B
542	chr14:20163219-20163600	chr14_2_tRNALeu_TAG+	TRNAL15	yes	4.35869	0	A	1.31259	A	1.31259	A	1.23563	A
544	chr14:20169009-20169381	chr14_20_tRNAThr_TGT-	TRNAT12	yes	3.19377	0.72	A	0.560715	A	0.137504	B	0.0703893	B
541	chr14:20151639-20152011	chr14_21_tRNAThr_TGT-	TRNAT2	yes	3.82018	0	A	1	A	0.70044	A	0.857981	A
540	chr14:20151250-20151621	chr14_22_tRNAPro_AGG-	TRNAP2	yes	4.2716	0.28	A	1.1745	A	0.870717	A	0.744161	A
538	chr14:20147185-20147556	chr14_23_tRNAPro_AGG-	TRNAP1	yes	3.65294	0.81	A	1.074	A	0.424498	B	0.831557	A
545	chr14:20170855-20171226	chr14_3_tRNAPro_TGG+	TRNAP7	yes	3.86598	0	A	0.827163	A	0.878694	A	0.403356	B
551	chr14:20219539-20219911	chr14_4_tRNAThr_TGT+	TRNAT20	yes	3.92871	0.48	A	1.06054	A	0.678072	A	0.36257	B
552	chr14:20221122-20221510	chr14_5_tRNATyr_GTA_I+	TRNAY14	yes	4.34272	0	A	1.17509	A	1.17509	A	1.42084	A
553	chr14:20221865-20222236	chr14_6_tRNAPro_TGG+	TRNAP17	yes	3.94218	0	A	1.04064	A	0.263034	B	1.25615	A
554	chr14:22468600-22468972	chr14_7_tRNAArg_ACG+	TRNAR21	yes	4.15171	1.17	A	1.06817	A	1.15433	A	1.63327	A
562	chr14:72499282-72499653	chr14_8_tRNACys_GCA+	TRNAC24	yes	3.73013	3.16	A	0.518467	B	0.518467	B	0.606464	B
565	chr14:88515045-88515417	chr14_9_tRNAAla_AGC+	TRNAA17	yes	2.9098	0	A	0.165059	B	0.241008	B	0.381871	B
570	chr15:43280491-43280862	chr15_1_tRNAHis_GTG+	TRNAH6	yes	3.80999	3.55	A	1.34395	A	0.943416	A	1.24338	A
567	chr15:38673165-38673546	chr15_10_tRNASer_GCT-	TRNAS18	yes	3.97062	2.28	A	1.52154	A	1.17509	A	1.50797	A
566	chr15:23878324-23878695	chr15_11_tRNAGlu_TTC-	TRNAE11	yes	3.09245	0	A	0.719892	A	0.612977	A	0.807355	A
574	chr15:76939809-76940181	chr15_2_tRNALys_CTT+	TRNAK6	yes	3.40336	0	A	0.976541	A	0.952694	A	0.600393	B
575	chr15:77823902-77824274	chr15_3_tRNACys_GCA+	TRNAC12	yes	2.63227	1.9	A	0.156119	B	0.118644	B	0.0136749	B
576	chr15:87679158-87679530	chr15_4_tRNAArg_TCG+	TRNAR22	yes	3.87254	0	A	1.10236	A	0.866733	A	1.3388	A
577	chr15:90055156-90055528	chr15_5_Pseudo_GTA-	TRNAY16P	yes	0.0874628	0	B	-0.0931094	B	0.129283	B	0.169925	B
573	chr15:74461670-74462043	chr15_6_Pseudo_CTT-	TRNAK42P	yes	-0.129283	0	B	-0.129283	B	-0.0418202	B	-0.222392	B
571	chr15:63948304-63948675	chr15_7_tRNAGln_CTG-	TRNAQ24	yes	3.52203	0	A	1.2123	A	0.449803	B	0.525091	B
569	chr15:43279753-43280124	chr15_8_tRNAHis_GTG-	TRNAH2	yes	3.90168	2.34	A	1.58496	A	1.3604	A	1.67726	A
568	chr15:43277946-43278317	chr15_9_tRNAHis_GTG-	TRNAH1	yes	4.00282	3.8	A	1.53916	A	1.12928	A	1.49719	A
583	chr16:3140526-3140898	chr16_1_tRNAArg_CCG+	TRNAR19	yes	3.98185	0	A	1.1745	A	1.09954	A	1.40988	A
598	chr16:3181352-3181724	chr16_10_tRNALys_CTT+	TRNAK26	yes	3.70677	0	A	0.936806	A	0.678072	A	0.847997	A
599	chr16:3181840-3182211	chr16_11_tRNAPro_AGG+	TRNAP20	yes	3.75192	0.46	A	0.712718	A	0.530515	B	0.737896	A
600	chr16:3183769-3184141	chr16_12_tRNAArg_CCT+	TRNAR23	yes	1.40336	0	A	0.293731	B	0.215729	B	0.367732	B
601	chr16:3186004-3186376	chr16_13_Pseudo_CTT+	TRNAK37P	yes	2.03449	0	A	0.331206	B	0.255257	B	0.0901978	B
602	chr16:3359664-3360035	chr16_14_tRNAGln_TTG+	TRNAQ31	yes	0	0	B	-0.0430687	B	-0.0430687	B	-0.133267	B
578	chr16:14287101-14287472	chr16_15_tRNAThr_CGT+	TRNAT6	yes	4.07682	0	A	1.59991	A	1.33985	A	1.37504	A
580	chr16:22215812-22216193	chr16_16_tRNALeu_AAG+	TRNAL27	yes	3.64992	2.73	A	1.17834	A	0.796467	A	1.08209	A
603	chr16:55891214-55891596	chr16_17_tRNALeu_CAG+	TRNAL11	yes	3.64263	2.19	A	1.06012	A	0.785261	A	1.17861	A
608	chr16:69379948-69380318	chr16_18_tRNAGly_GCC+	TRNAG16	yes	1.21573	0	A	0.215729	B	0.0901978	B	0.438121	B
609	chr16:69380761-69381131	chr16_19_tRNAGly_GCC+	TRNAG20	yes	2.42951	2.46	A	0.255257	B	0.215729	B	0.58261	B
585	chr16:3142792-3143124	chr16_2_tRNAArg_CCT+	TRNAR18	yes	3.83825	0	A	1.27753	A	0.683526	A	1.27753	A
610	chr16:70017747-70018119	chr16_20_tRNAMet_CAT+	TRNAM9	yes	3.49791	0	A	0.434403	B	0.405256	B	0.597902	B
611	chr16:70282241-70282614	chr16_21_tRNAGln_CTG+	TRNAQ28	yes	-0.341037	0	B	-0.0780025	B	-0.341037	B	-0.339772	B
613	chr16:85974979-85975351	chr16_22_tRNAMet_CAT-	TRNAM13	yes	3.4975	0	A	0.584963	A	0.640458	A	1.10236	A
612	chr16:72069567-72069939	chr16_23_tRNALys_TTT-	TRNAK17	yes	1.99159	3.45	A	-0.25634	B	-0.140863	B	-0.211252	B
607	chr16:69370293-69370663	chr16_24_tRNAGly_GCC-	TRNAG6	yes	3.56264	0.8	A	0.818162	A	0.634716	A	0.816529	B
606	chr16:69369465-69369835	chr16_25_tRNAGly_GCC-	TRNAG5	yes	2.77083	0	A	-0.0740006	B	0.378512	B	-0.0551416	B
604	chr16:55891743-55892125	chr16_26_tRNALeu_CAG-	TRNAL13	yes	3.99484	2.32	A	1.37851	A	1.06054	A	1.60392	A
579	chr16:22114383-22114764	chr16_27_tRNALeu_TAG-	TRNAL7	yes	3.53374	0	A	1.01668	A	0.913585	A	1.14359	A
595	chr16:3173984-3174355	chr16_28_tRNAPro_TGG-	TRNAP19	yes	3.35755	21.15	A	0.688056	A	0.712718	A	0.600904	B
594	chr16:3172486-3172857	chr16_29_tRNAPro_AGG-	TRNAP9	yes	3.34529	1.43	A	0.633218	A	0.192645	B	0.645033	B
587	chr16:3148774-3149145	chr16_3_tRNAPro_TGG+	TRNAP16	yes	2.89907	0	A	0.375509	B	0.434403	B	0.133954	B
593	chr16:3170406-3170778	chr16_30_tRNALys_CTT-	TRNAK24	yes	2.88264	0	A	0	B	-0.234465	B	0.584963	B
590	chr16:3160812-3161182	chr16_31_Pseudo_TGG-	TRNAP26P	yes	0.247928	0	B	0.0443941	B	0	B	-0.0458037	B
586	chr16:3147257-3147629	chr16_32_tRNALys_CTT-	TRNAK9	yes	3.60433	0	A	0.697437	A	0.767827	A	0.67319	A
584	chr16:3142460-3142791	chr16_33_Pseudo_AGG-	TRNAP24P	yes	2.63472	0	A	0.559427	A	0.211504	B	0.961526	A
605	chr16:626587-626957	chr16_34_tRNAGly_CCC-	TRNAG4	yes	3.7605	0.06	A	1.10962	A	0.424498	B	1.20328	A
588	chr16:3150237-3150631	chr16_4_tRNAPro_AGG_I+	TRNAP5	yes	0.241008	4.73	B	0.0848889	B	0.125531	B	0.125531	B
589	chr16:3154790-3155162	chr16_5_tRNALys_CTT+	TRNAK15	yes	0.165059	0	B	0.0430687	B	0.0430687	B	0.241008	B
591	chr16:3161900-3162271	chr16_6_tRNAPro_CGG+	TRNAP12	yes	3.46352	0	A	0.491853	B	0.491853	B	0.539159	B
592	chr16:3165543-3165915	chr16_7_tRNALys_CTT+	TRNAK21	yes	3.53766	0	A	0.746243	A	0.630766	A	0.71256	A
596	chr16:3177945-3178316	chr16_8_tRNAPro_TGG+	TRNAP21	yes	3.04439	30.54	A	0.61471	A	0.584963	A	0.446256	B
597	chr16:3179485-3179856	chr16_9_tRNAPro_AGG+	TRNAP18	yes	3.86673	1.44	A	1.02106	A	0.584963	A	0.992022	A
641	chr17:7465032-7465400	chr17_1_Pseudo_???+		yes	0	6.25	B	-0.255257	B	-0.0801703	B	-0.112592	B
655	chr17:8065441-8065812	chr17_10_tRNAGly_TCC+	TRNAG18	yes	3.62902	0	A	0.966053	A	0.703018	A	0.74366	A
615	chr17:15349260-15349633	chr17_11_tRNASup_CTA+	TRNASUP3	yes	0	4.39	B	-0.0395284	B	-0.255257	B	0.354402	B
618	chr17:19351936-19352307	chr17_12_tRNATrp_CCA+	TRNAW7	yes	3.47721	0	A	0.949959	A	0.649093	A	1.34792	A
620	chr17:19704617-19704987	chr17_13_tRNAGly_CCC+	TRNAG26	yes	0.0848889	0	B	0.203533	B	-0.0443941	B	0	B
623	chr17:26901063-26901434	chr17_14_tRNAThr_CGT+	TRNAT10	yes	3.75174	0	A	1.14136	A	0.4975	B	0.866733	A
628	chr17:34277274-34277645	chr17_15_tRNACys_GCA+	TRNAC7	yes	3.83221	0.73	A	1.19994	A	0.790547	A	1.03752	A
633	chr17:44624739-44625110	chr17_16_tRNAGln_TTG+	TRNAQ2	yes	3.9349	0	A	1.52725	A	0.934905	A	1.59904	A
634	chr17:56218225-56218595	chr17_17_tRNASup_TTA+	TRNASUP1	yes	0.293731	0	B	0	B	0.0458037	B	0.133267	B
638	chr17:70541446-70541818	chr17_18_tRNAArg_CCT+	TRNAR8	yes	3.7252	0	A	1.1375	A	0.887525	A	1.3147	A
640	chr17:70542653-70543025	chr17_19_tRNAArg_TCG+	TRNAR25	yes	3.9432	0	A	1.4517	A	1.25239	A	1.3388	A
643	chr17:7963048-7963420	chr17_2_tRNALys_TTT+	TRNAK1	yes	4.06465	0.51	A	1.18057	A	0.975752	A	1.37233	A
642	chr17:78045736-78046107	chr17_20_tRNAMet_CAT-	TRNAM14	yes	3.54344	0.23	A	1.03037	A	0.785261	A	0.98263	A
639	chr17:70541971-70542343	chr17_21_tRNAArg_CCT-	TRNAR20	yes	3.50533	0	A	0.530515	A	0.552541	B	0.891851	A
637	chr17:63902402-63902776	chr17_22_tRNAUndet_???-		yes	0.121991	0	B	-0.0874628	B	0.160465	B	0.197939	B
636	chr17:63446325-63446697	chr17_23_tRNAArg_CCG-		yes	3.59887	0	A	0.74366	A	0.504473	B	0.802554	A
635	chr17:59957230-59957603	chr17_24_tRNAThr_AGT-	TRNAT22	yes	-0.192645	20.42	B	-0.112475	B	-0.0365259	B	-0.117235	B
632	chr17:35526929-35527302	chr17_25_tRNASeC_TCA-	TRNAU3	yes	0	1.53	B	0.285402	B	0.209453	B	-0.0270202	B
631	chr17:34564120-34564491	chr17_26_tRNACys_GCA-	TRNAC30	yes	3.70044	1.75	A	1.12102	A	0.510962	B	1.05257	A
630	chr17:34563363-34563734	chr17_27_tRNACys_GCA-	TRNAC29	yes	3.64829	0.8	A	1.03653	A	0.714598	A	1.29881	A
629	chr17:34278921-34279292	chr17_28_tRNACys_GCA-	TRNAC9	yes	3.67596	0	A	1.10852	A	0.807355	A	1.26679	A
627	chr17:34271313-34271684	chr17_29_tRNACys_GCA-	TRNAC5	yes	1.67557	0	A	-0.0824622	B	-0.263034	B	-0.040642	B
644	chr17:7963645-7964016	chr17_3_tRNAGln_CTG+	TRNAQ1	yes	3.55923	0	A	1.08489	A	0.241008	B	0.977974	A
626	chr17:34243351-34243722	chr17_30_tRNACys_GCA-	TRNAC1	yes	0.827163	44.57	A	0.175087	B	0.133267	B	0.255257	B
625	chr17:34161410-34161783	chr17_31_tRNAAsn_GTT-	TRNAN17	yes	3.47249	0.59	A	0.744161	A	0.584963	A	1.09311	A
621	chr17:21952156-21952524	chr17_32_Pseudo_TGA-	TRNAS30P	yes	-0.165059	0	B	-0.255257	B	-0.165059	B	-0.121991	B
619	chr17:19447029-19447400	chr17_33_Pseudo_TTG-	TRNAQ41P	yes	0.0848889	2.41	B	-0.0443941	B	0.0848889	B	0.20637	B
660	chr17:8070884-8071257	chr17_34_tRNAIle_AAT-	TRNAI24	yes	3.5518	0	A	0.862496	A	0.628031	A	0.983512	A
659	chr17:8070503-8070884	chr17_35_tRNASer_AGA-	TRNAS14	yes	3.91126	1.55	A	1.03242	A	0.690316	A	1.04836	A
658	chr17:8070128-8070501	chr17_36_tRNAThr_AGT-	TRNAT9	yes	3.93707	0.2	A	1.10188	A	0.573185	A	1.15024	A
657	chr17:8066726-8067097	chr17_37_tRNAPro_CGG-	TRNAP8	yes	3.97358	0	A	1.0902	A	0.928447	A	1.94667	A
656	chr17:8066131-8066502	chr17_38_tRNAAsp_GTC-	TRNAD17	yes	3.79181	0	A	1.10434	A	0.827819	A	1.3114	A
654	chr17:8064762-8065133	chr17_39_tRNATrp_CCA-	TRNAW4	yes	3.72022	0	A	1.05445	A	0.645335	A	0.967263	A
646	chr17:7964818-7965205	chr17_4_tRNAArg_TCT_I+	TRNAR1	yes	3.31133	0	A	0.397335	B	0.342888	B	0.871267	A
649	chr17:7983345-7983718	chr17_40_tRNAThr_AGT-	TRNAT3	yes	3.85244	0	A	0.736966	A	0.662965	A	1.38466	A
648	chr17:7982774-7983155	chr17_41_tRNASer_CGA-	TRNAS6	yes	3.70559	0.05	A	0.74366	A	0.783189	A	0.68226	A
645	chr17:7964207-7964588	chr17_42_tRNALeu_TAG-	TRNAL2	yes	3.69727	0	A	1	A	0.824913	A	0.652077	A
647	chr17:7969639-7970009	chr17_5_tRNAGly_GCC+	TRNAG2	yes	3.82597	0	A	0.838249	A	0.788496	A	1.26711	A
650	chr17:8030251-8030622	chr17_6_tRNATrp_CCA+	TRNAW3	yes	3.49506	0	A	0.632268	A	0.405992	B	1.31107	A
651	chr17:8030759-8031096	chr17_7_tRNASer_GCT+	TRNAS23	yes	3.88613	1.65	A	1.60768	A	1.44057	A	1.9667	A
652	chr17:8031097-8031426	chr17_8_tRNAThr_AGT+	TRNAT8	yes	4.19039	0.4	A	1.67807	A	1	A	1.81323	A
653	chr17:8031486-8031859	chr17_9_tRNAIle_AAT+	TRNAI23	yes	4.32673	0.64	A	1.45066	A	1.34104	A	1.40357	A
662	chr18:41553599-41553970	chr18_1_tRNAGlu_CTC+	TRNAE25	yes	-0.0848889	0	B	-0.0848889	B	0.0801703	B	-0.21939	B
664	chr18:53496702-53497049	chr18_2_Pseudo_TCC+	TRNAG33P	yes	0	100	B	0.222392	B	0.0473057	B	0.180572	B
665	chr18:53497049-53497396	chr18_3_Pseudo_TCC+	TRNAG35P	yes	0.0473057	63.21	B	0.0931094	B	0.0473057	B	0.0931094	B
663	chr18:41923119-41923491	chr18_4_tRNALys_CTT-	TRNAK4	yes	0	0	B	-0.0458037	B	0.247928	B	0.321928	B
667	chr19:1334498-1334785	chr19_1_tRNAAsn_GTT+	TRNAN20	yes	3.56533	0.59	A	1.19994	A	0.91983	A	1.58929	A
672	chr19:44594498-44594890	chr19_10_tRNAIle_TAT_I-	TRNAI18	yes	3.49643	0	A	0.514573	B	0.455679	B	1.1375	A
671	chr19:40803150-40803520	chr19_11_Pseudo_???-		yes	-0.0901978	0	B	0	B	0	B	0.203533	B
696	chr19:9011206-9011578	chr19_12_Pseudo_TTG-	TRNAQ45P	yes	0.0443941	0	B	0.285402	B	0	B	0.0874628	B
676	chr19:4675497-4675869	chr19_13_tRNAVal_CAC-	TRNAV32	yes	3.53294	0	A	1.12102	A	0.632268	A	0.536053	B
666	chr19:1334211-1334497	chr19_14_tRNAPhe_GAA-	TRNAF10	yes	3.99537	0.82	A	1.54749	A	1.4011	A	1.82834	A
675	chr19:4674932-4675303	chr19_2_tRNAGly_TCC+	TRNAG3	yes	3.82288	0	A	1.08489	A	0.977974	A	0.813587	A
668	chr19:19713057-19713427	chr19_3_tRNALys_TTT+	TRNAK7	yes	0.392317	0	B	-0.0458037	B	-0.0931094	B	-0.0931094	B
669	chr19:38359653-38360026	chr19_4_tRNAThr_AGT+	TRNAT4	yes	3.69061	0.29	A	1.23447	A	0.889817	A	0.693897	A
670	chr19:40758440-40758812	chr19_5_tRNALys_CTT+	TRNAK28	yes	0.175087	0	B	0.133267	B	0.331206	B	0.0901978	B
694	chr19:57117058-57117430	chr19_6_tRNALys_CTT-	TRNAK30	yes	0.0901978	0	B	0.215729	B	0.133267	B	0.31259	B
683	chr19:54729595-54729967	chr19_7_tRNALys_TTT-	TRNAK32	yes	0.447459	0	B	0.241008	B	0	B	-0.137504	B
677	chr19:50673550-50673935	chr19_8_tRNASeC(e)_TCA-	TRNAU1	yes	3.79941	0	A	0.943416	A	0.547488	B	0.780687	A
674	chr19:46439832-46440204	chr19_9_Pseudo_TTT-	TRNAK38P	yes	0.169925	0	B	0	B	0.392317	B	0.247928	B
159	chr2:11609128-11609499	chr2_1_Pseudo_CCC+	TRNAG32P	yes	0.247928	0	B	0.285402	B	0.169925	B	0	B
165	chr2:131856462-131856831	chr2_10_Pseudo_TGA+	TRNAS31P	yes	0.0443941	0	B	0.129283	B	0.129283	B	0	B
166	chr2:131859453-131859824	chr2_11_Pseudo_TTG+	TRNAQ39P	yes	-0.0418202	0	B	-0.0848889	B	0.0801703	B	-0.175087	B
167	chr2:150927373-150927745	chr2_12_Pseudo_CTC+	TRNAE38P	yes	0.0443941	39.66	B	0	B	0.0443941	B	0.170791	B
168	chr2:156965377-156965748	chr2_13_tRNAAla_CGC+	TRNAA4	yes	3.85086	0	A	0.979241	A	0.703607	A	0.824913	A
172	chr2:218818644-218819036	chr2_14_tRNATyr_ATA_I+	TRNAY9	yes	0.313158	0	B	-0.0901978	B	0.0430687	B	0.0430687	B
173	chr2:219199226-219199601	chr2_15_Pseudo_CTG+	TRNAQ44P	yes	0.215729	0	B	0.0901978	B	0.331206	B	0.0458037	B
174	chr2:223894409-223894781	chr2_16_Pseudo_TTT-	TRNAK39P	yes	-0.165059	0	B	-0.121991	B	-0.121991	B	-0.0395284	B
171	chr2:203937226-203937596	chr2_17_Pseudo_TTC-	TRNAE40P	yes	0.165059	4.26	B	0.165059	B	-0.0443941	B	-0.0443941	B
170	chr2:159446267-159446638	chr2_18_Pseudo_CTC-	TRNAE41P	yes	-0.0418202	4.54	B	-0.0418202	B	-0.222392	B	-0.0418202	B
169	chr2:156965755-156966125	chr2_19_tRNAGly_GCC-	TRNAG19	yes	3.60638	0	A	1.03653	A	0.823122	A	0.746351	A
175	chr2:27127004-27127392	chr2_2_tRNATyr_GTA_I+	TRNAY4	yes	4.0613	0	A	1.67557	A	1.23947	A	1.58496	A
164	chr2:130811021-130811392	chr2_20_tRNAGlu_TTC-	TRNAE26	yes	3.70695	0	A	1.38827	A	0.843274	A	1.44392	A
163	chr2:130749344-130749713	chr2_21_tRNASer_TGA-	TRNAS8	yes	-0.129283	0	B	-0.0418202	B	-0.0848889	B	-0.0418202	B
162	chr2:130746231-130746602	chr2_22_Pseudo_TTG-	TRNAQ36P	yes	-0.125531	0	B	0	B	-0.0824622	B	-0.169925	B
161	chr2:117498829-117499200	chr2_23_tRNAGln_TTG-	TRNAQ18	yes	0.0874628	0	B	-0.0458037	B	0.0443941	B	0.169925	B
188	chr2:95580771-95581142	chr2_24_Pseudo_CTC-	TRNAE36P	yes	-0.148099	10.2	B	0.0347654	B	-0.228269	B	0.22741	B
184	chr2:71126846-71127218	chr2_25_Pseudo_CTC-	TRNAE31P	yes	0.165059	4.34	B	0.125531	B	0.125531	B	0.125531	B
183	chr2:70517315-70517685	chr2_26_Pseudo_???-		yes	0.156119	0	B	0.156119	B	-0.0418202	B	-0.0418202	B
182	chr2:70329477-70329847	chr2_27_tRNAGly_CCC-	TRNAG22	yes	3.6329	0.07	A	1.1304	A	0.571906	A	0.801774	A
180	chr2:45790795-45791167	chr2_28_Pseudo_TTG-	TRNAQ34P	yes	-0.125531	0	B	-0.0824622	B	-0.263034	B	-0.040642	B
176	chr2:27127436-27127808	chr2_3_tRNAAla_AGC+	TRNAA3	yes	3.70548	0	A	1.43539	A	0.606658	A	1.15528	A
177	chr2:30130922-30131294	chr2_4_tRNALeu_AAG+	TRNAL9	yes	-0.129283	0	B	0.040642	B	-0.129283	B	0.36257	B
179	chr2:42891030-42891422	chr2_5_tRNAIle_TAT_I+	TRNAI13	yes	4.05528	0	A	1.72792	A	1.39232	A	1.84549	A
185	chr2:74977404-74977772	chr2_6_tRNAGlu_TTC+	TRNAE10	yes	-0.0759489	0	B	-0.378512	B	-0.0759489	B	-0.378512	B
186	chr2:77748951-77749321	chr2_7_Pseudo_AGG+	TRNAP25P	yes	0	68.42	B	0.040642	B	0.156119	B	-0.0207586	B
187	chr2:87192934-87193305	chr2_8_Pseudo_AGG+	TRNAP28P	yes	-0.203533	84.52	B	0	B	-0.160465	B	-0.0823161	B
160	chr2:117497737-117498111	chr2_9_Pseudo_TAA+	TRNAL46P	yes	0.0901978	0	B	0.255257	B	0.255257	B	0.215729	B
699	chr20:17802992-17803369	chr20_1_tRNAGln_CTG+	TRNAQ23	yes	1.05889	0	A	0.0780025	B	0.0780025	B	0	B
700	chr20:29552214-29552585	chr20_2_Pseudo_AGA+	TRNAS29P	yes	0.125531	0.34	B	0	B	0.0430687	B	0.0848889	B
702	chr20:43384265-43384637	chr20_3_Pseudo_CAC+	TRNAV33P	yes	0.115477	0.82	B	-0.125531	B	-0.263034	B	0.00568603	B
705	chr20:55366685-55367059	chr20_4_Pseudo_TAA-	TRNAL42P	yes	-0.115477	0	B	-0.0759489	B	-0.115477	B	-0.378512	B
704	chr20:50651595-50651972	chr20_5_Pseudo_AAT-	TRNAI30P	yes	-0.175087	0	B	0.228269	B	-0.0418202	B	-0.0848889	B
703	chr20:48385599-48385980	chr20_6_tRNALeu_AAG-	TRNAL39	yes	-0.289507	0	B	-0.289507	B	-0.289507	B	-0.249978	B
698	chr20:13918320-13918691	chr20_7_Pseudo_CTC-	TRNAE43P	yes	0	0	B	-0.0443941	B	0	B	-0.0443941	B
707	chr21:14848237-14848607	chr21_1_tRNASup_TTA+	TRNASUP2	yes	0.209453	0	B	0.0443941	B	0.0874628	B	-0.0931094	B
708	chr21:17748828-17749198	chr21_2_tRNAGly_GCC-	TRNAG27	yes	3.4132	1.99	A	0.594744	A	0.267933	B	0.631145	B
710	chr22:42877720-42878105	chr22_1_tRNASeC(e)_TCA+	TRNAU2	yes	0.169925	18.47	B	0.0443941	B	0.169925	B	0.0583263	B
194	chr3:13808737-13809104	chr3_1_Pseudo_CTA+	TRNASUP4P	yes	-0.0824622	0	B	0.0780025	B	-0.263034	B	-0.215729	B
189	chr3:105362064-105362435	chr3_10_Pseudo_CTC-	TRNAE27P	yes	0	0	B	-0.0874628	B	-0.180572	B	0.121991	B
202	chr3:45705345-45705717	chr3_11_tRNAArg_ACG-	TRNAR11	yes	3.8404	0.49	A	1.49099	A	0.91983	A	1.2824	B
198	chr3:17716246-17716618	chr3_12_Pseudo_GCA-	TRNAC31P	yes	0.169925	31.78	B	0.0443941	B	0.0443941	B	-0.0289791	B
197	chr3:170972562-170972934	chr3_2_tRNAVal_AAC+	TRNAV24	yes	3.56605	0	A	0.930737	A	0.906891	A	0.626439	B
199	chr3:185848639-185849009	chr3_3_tRNAAsp_GTC-	TRNAD7	yes	0.215729	0	B	0.133267	B	-0.0473057	B	0.133267	B
196	chr3:149799103-149799474	chr3_4_tRNAHis_GTG-	TRNAH8	yes	-0.293731	0	B	-0.160465	B	-0.203533	B	-0.293731	B
195	chr3:149703768-149704149	chr3_5_tRNALeu_AAG-	TRNAL33	yes	0.0395284	0	B	0	B	-0.215729	B	-0.125531	B
193	chr3:133433182-133433553	chr3_6_tRNACys_GCA-	TRNAC18	yes	3.65535	0.14	A	0.703607	A	0.847997	A	1.06054	A
192	chr3:133430484-133430855	chr3_7_tRNACys_GCA-	TRNAC14	yes	2.68353	2.51	A	0.241008	B	0.0430687	B	0.259387	B
191	chr3:126895717-126896088	chr3_8_tRNAGlu_CTC-	TRNAE9	yes	0	3.22	B	0.115477	B	-0.040642	B	-0.040642	B
190	chr3:108103418-108103789	chr3_9_Pseudo_TTG-	TRNAQ42P	yes	-0.0824622	0	B	-0.263034	B	-0.215729	B	-0.263034	B
205	chr4:156603188-156603559	chr4_1_Pseudo_TTG+	TRNAQ54P	yes	-0.0848889	0	B	-0.0848889	B	-0.0418202	B	-0.222392	B
206	chr4:156604278-156604652	chr4_2_tRNALeu_TAA-	TRNAL31	yes	-0.0430687	0	B	-0.0430687	B	0	B	0	B
204	chr4:124649305-124649676	chr4_3_tRNACys_GCA-	TRNAC16	yes	0.745427	28.97	A	0.160465	B	0.436099	B	0.0433549	B
208	chr4:40603350-40603722	chr4_4_tRNAGln_TTG-	TRNAQ7	yes	0.241008	0	B	0.125531	B	0.165059	B	-0.0901978	B
211	chr4:7376589-7376960	chr4_5_Pseudo_TTA-	TRNASUP5P	yes	0.491853	0	B	0.169925	B	0.209453	B	0	B
218	chr5:151968639-151969114	chr5_1_Pseudo_ACA_I+	TRNAC32P	yes	-0.0874628	0	B	0.0824622	B	-0.133267	B	0.121991	B
239	chr5:180581851-180582223	chr5_10_tRNAVal_CAC-		yes	3.64807	2.02	A	1.03477	A	0.642448	A	1.14571	A
238	chr5:180581435-180581807	chr5_11_tRNALys_CTT-	TRNAK33	yes	4.1652	0	A	0.934905	A	0.745427	A	0.460974	B
237	chr5:180577726-180578098	chr5_12_tRNAVal_AAC-	TRNAV10	yes	3.76155	0.02	A	1.39232	A	0.672425	A	1.16153	A
234	chr5:180551143-180551514	chr5_13_tRNAThr_TGT-	TRNAT1	yes	3.36355	0	A	0.708537	A	0.370368	B	1.24236	A
233	chr5:180548310-180548681	chr5_14_tRNAPro_TGG-	TRNAP3	yes	3.74723	0	A	0.915111	A	0.703607	A	1.2733	A
232	chr5:180547872-180548244	chr5_15_tRNAVal_AAC-	TRNAV5	yes	3.7879	0.19	A	1.26679	A	1.20945	A	1.07711	A
230	chr5:180533500-180533881	chr5_16_tRNALeu_AAG-	TRNAL32	yes	3.43539	6.61	A	0.540568	A	0.813587	A	0.862496	A
227	chr5:180524020-180524401	chr5_17_Pseudo_AAG-	TRNAL43P	yes	2.19794	0.97	A	-0.0430687	B	0.121991	B	-0.180572	B
225	chr5:180461709-180462081	chr5_18_tRNAVal_CAC-		yes	3.66706	100	A	1.05733	A	0.812914	A	1.1253	A
223	chr5:180456930-180457311	chr5_19_tRNALeu_AAG-	TRNAL4	yes	3.27657	100	A	0.465664	B	0.440573	B	0.0506261	B
222	chr5:180456526-180456898	chr5_2_tRNAVal_CAC+		yes	3.82889	100	A	1.03747	A	0.881356	A	1.05976	A
219	chr5:159324469-159324846	chr5_20_tRNALeu_CAG-		yes	-0.121991	0	B	0.0759489	B	-0.165059	B	0.112475	B
217	chr5:151228117-151228488	chr5_21_Pseudo_CTG-	TRNAQ53P	yes	-0.0395284	0	B	-0.0395284	B	0.0759489	B	-0.302563	B
216	chr5:141754022-141754393	chr5_22_tRNAAsp_GTC-	TRNAD3	yes	-0.234465	1.1	B	-0.367732	B	-0.112475	B	-0.230765	B
241	chr5:77354382-77354754	chr5_23_Pseudo_TTG-	TRNAQ33P	yes	-0.121991	0	B	0.216811	B	0.148099	B	-0.121991	B
240	chr5:26234146-26234518	chr5_24_tRNALys_CTT-	TRNAK2	yes	-0.175087	20	B	0	B	-0.0848889	B	-0.2144	B
224	chr5:180461296-180461677	chr5_3_tRNALeu_AAG+	TRNAL24	yes	3.58496	100	A	0.655352	A	0.632268	A	0.121015	B
226	chr5:180523610-180523982	chr5_4_tRNAVal_AAC+	TRNAV1	yes	3.54314	44.4	A	0.598637	A	0.625604	A	0.675493	A
228	chr5:180529066-180529438	chr5_5_tRNAVal_AAC+	TRNAV3	yes	3.92057	33.53	A	1.02046	A	1.09954	A	1.17267	A
229	chr5:180533106-180533478	chr5_6_tRNAVal_CAC+		yes	3.46975	0.31	A	0.706269	A	0.306661	B	0.328422	B
231	chr5:180547157-180547538	chr5_7_tRNALeu_AAG+	TRNAL34	yes	4.0136	2.67	A	0.909802	A	0.510195	B	1.28563	A
235	chr5:180566324-180566695	chr5_8_tRNAAla_TGC+	TRNAA26	yes	3.73013	0.03	A	1.19994	A	0.744743	A	1.32193	A
236	chr5:180567211-180567583	chr5_9_tRNALys_CTT+	TRNAK18	yes	4.04696	0	A	1.10236	A	0.819428	A	0.88523	A
248	chr6:18944231-18944602	chr6_1_tRNAGln_CTG+	TRNAQ11	yes	0.459432	43.47	B	0.321928	B	0.209453	B	0.189825	B
267	chr6:26661560-26661931	chr6_10_tRNAAla_CGC+	TRNAA5	yes	3.45615	0	A	0.906891	A	0.807355	A	0.744161	A
397	chr6:28971829-28972234	chr6_100_tRNALeu_CAA_I-	TRNAL25	yes	3.71497	2.28	A	1.27563	A	0.941897	A	1.29811	A
395	chr6:28939291-28939662	chr6_101_tRNAAla_AGC-	TRNAA34	yes	3.69165	0	A	1.01886	A	0.634716	A	0.857108	A
394	chr6:28914050-28914421	chr6_102_tRNAAla_AGC-	TRNAA33	yes	3.75974	0	A	1.24101	A	0.736966	A	0.594645	B
393	chr6:28898922-28899295	chr6_103_tRNAPhe_GAA-	TRNAF9	yes	0.560715	0	B	-0.277534	B	-0.367732	B	-0.277534	B
392	chr6:28892841-28893212	chr6_104_tRNAAla_TGC-	TRNAA19	yes	3.50371	1.66	A	0.514573	B	0.543142	B	0.34645	B
391	chr6:28887678-28888049	chr6_105_tRNAAla_AGC-	TRNAA31	yes	3.29278	4.5	A	0.543142	A	0.485427	B	0.514573	B
390	chr6:28883439-28883811	chr6_106_tRNAPhe_GAA-	TRNAF8	yes	3.44931	0	A	0.691878	A	0.358454	B	0.884523	A
389	chr6:28878406-28878776	chr6_107_tRNAAla_TGC-	TRNAA15	yes	3.21945	2.07	A	0.228269	B	0.330149	B	-0.0207586	B
388	chr6:28871570-28871941	chr6_108_tRNAAla_AGC-	TRNAA30	yes	3.63346	3.1	A	0.962525	A	0.645335	A	0.597745	B
387	chr6:28866328-28866700	chr6_109_tRNAPhe_GAA-	TRNAF7	yes	3.06547	0.66	A	0.485427	B	0.425306	B	-0.0285936	B
268	chr6:26662179-26662552	chr6_11_tRNAIle_AAT+	TRNAI1	yes	3.59797	0.69	A	0.919382	A	0.584963	A	0.528825	B
386	chr6:28865376-28865747	chr6_110_tRNAAla_TGC-	TRNAA11	yes	3.40157	0	A	0.597902	A	0.375509	B	0.518467	B
385	chr6:28854373-28854744	chr6_111_Pseudo_AGC-	TRNAA44P	yes	0.874469	8.61	A	0.263034	B	0.485427	B	0.112195	B
383	chr6:28839203-28839576	chr6_112_tRNAPhe_GAA-	TRNAF4	yes	0.0443941	0	B	-0.0458037	B	0.0874628	B	-0.0931094	B
382	chr6:28833970-28834341	chr6_113_tRNAAla_TGC-	TRNAA10	yes	2.8594	0	A	0.296982	B	0	B	0.425306	B
380	chr6:28818558-28818930	chr6_114_tRNAArg_CCG-	TRNAR9	yes	3.44294	0	A	0.584963	A	0.426265	B	0.554589	B
379	chr6:28811035-28811406	chr6_115_tRNAVal_AAC-	TRNAV18	yes	3.10992	0	A	0.552541	A	0.302563	B	0.736966	A
377	chr6:28802684-28803056	chr6_116_Pseudo_GAA-	TRNAF13P	yes	-0.118644	0	B	-0.0780025	B	-0.0780025	B	-0.341037	B
373	chr6:28771538-28771909	chr6_117_tRNAAla_CGC-	TRNAA38	yes	1.90689	0	A	0.129283	B	-0.0458037	B	0.0443941	B
372	chr6:28768816-28769189	chr6_118_Pseudo_TTT-	TRNAK43P	yes	1.6909	0	A	-0.0848889	B	0.0801703	B	0.040642	B
371	chr6:28749442-28749813	chr6_119_tRNAAla_CGC-	TRNAA29	yes	3.8314	0	A	1.19794	A	0.79518	A	1.55639	A
269	chr6:26663327-26663698	chr6_12_tRNAPro_AGG+	TRNAP13	yes	3.36786	0.19	A	0.745427	A	0.527247	B	0.42429	B
370	chr6:28733843-28734214	chr6_120_tRNAAla_AGC-	TRNAA24	yes	3.43463	0	A	0.930737	A	0.857981	A	0.247928	B
369	chr6:28723813-28724186	chr6_121_tRNAThr_CGT-	TRNAT17	yes	3.48403	0	A	0.812914	A	0.375509	B	0.545434	B
367	chr6:28709688-28710059	chr6_122_Pseudo_TGC-	TRNAA46P	yes	0.209453	0	B	0.0443941	B	-0.0931094	B	0.0443941	B
365	chr6:28672946-28673327	chr6_123_tRNASer_GCT-	TRNAS17	yes	3.35325	2.51	A	0.750972	A	0.771731	A	0.31958	B
363	chr6:28618720-28619092	chr6_124_tRNAArg_TCG-	TRNAR28	yes	3.90046	0	A	1	A	0.847997	A	0.616671	B
361	chr6:28564599-28564972	chr6_125_tRNAThr_CGT-	TRNAT13	yes	3.56009	0	A	0.645335	A	0	B	0.0721498	B
360	chr6:28554229-28554610	chr6_126_tRNALeu_AAG-	TRNAL12	yes	0.449803	0	B	-0.228269	B	-0.270089	B	-0.228269	B
359	chr6:28550158-28550531	chr6_127_tRNAThr_TGT-	TRNAT16	yes	3.67243	0	A	0.744161	A	0.378512	B	0.536053	B
357	chr6:27978515-27978885	chr6_128_tRNAGly_GCC-	TRNAG12	yes	3.75489	0	A	1.19502	A	0.881356	A	1.23467	A
356	chr6:27978100-27978471	chr6_129_tRNAMet_CAT-		yes	3.56071	0	A	0.830075	A	0.39079	B	0.715161	A
270	chr6:26664603-26664975	chr6_13_tRNALys_CTT+	TRNAK14	yes	4.12928	0.23	A	0.882643	A	0.70044	A	0.776104	A
355	chr6:27871469-27871840	chr6_130_tRNAGln_TTG-	TRNAQ12	yes	3.82597	0	A	0.955606	A	0.656046	A	1.30433	A
354	chr6:27866964-27867335	chr6_131_tRNAGln_CTG-	TRNAQ22	yes	3.88408	0	A	1.51245	A	0.912537	A	1.30485	A
352	chr6:27829008-27829380	chr6_132_tRNAVal_AAC-	TRNAV17	yes	3.61005	0	A	1.17834	A	0.961526	A	0.761061	A
351	chr6:27804156-27804528	chr6_133_tRNAVal_CAC-	TRNAV28	yes	0	0	B	0.0443941	B	-0.0458037	B	0.209453	B
349	chr6:27796727-27797109	chr6_134_tRNALeu_TAA-	TRNAL16	yes	2.01886	0	A	-0.247928	B	-0.203533	B	0.109624	B
347	chr6:27760303-27760676	chr6_135_tRNAThr_AGT-	TRNAT15	yes	3.5518	0.68	A	0.710493	A	0.381871	B	0.540568	B
345	chr6:27756714-27757086	chr6_136_tRNAVal_AAC-	TRNAV12	yes	1.24576	0	A	0.118644	B	-0.0418202	B	-0.0418202	B
344	chr6:27748058-27748439	chr6_137_tRNASer_CGA-	TRNAS15	yes	2.65821	0	A	0.523562	A	0.0874628	B	0.491853	B
343	chr6:27746173-27746545	chr6_138_tRNAArg_ACG-	TRNAR29	yes	3.16993	0.88	A	0.4975	B	0.467126	B	0.197939	B
340	chr6:27726536-27726908	chr6_139_tRNAVal_AAC-	TRNAV8	yes	2.79055	0	A	0.0759489	B	0.0759489	B	0.0384741	B
271	chr6:26676915-26677305	chr6_14_tRNATyr_GTA_I+	TRNAY7	yes	3.558	0	A	1.38466	A	1.078	A	1.32193	A
337	chr6:27681246-27681653	chr6_140_tRNALeu_CAA_I-	TRNAL22	yes	3.22668	0	A	0.5025	B	0.444785	B	0.530515	B
336	chr6:27678177-27678583	chr6_141_tRNALeu_CAA_I-	TRNAL8	yes	2.57225	1.96	A	0.109624	B	0.337035	B	0.216298	B
335	chr6:27668473-27668800	chr6_142_tRNAMet_CAT-		yes	3.68299	1.28	A	1.18982	A	1.20945	A	1.04166	A
334	chr6:27667422-27667794	chr6_143_tRNALys_TTT-	TRNAK22	yes	3.41626	0	A	0.623437	A	0.518467	B	0.6894	A
333	chr6:27659065-27659436	chr6_144_tRNAAsp_GTC-	TRNAD14	yes	3.30378	0	A	0.807355	A	0.426265	B	0.584963	B
330	chr6:27629021-27629402	chr6_145_tRNASer_AGA-	TRNAS25	yes	3.09433	0	A	0.148099	B	0.314109	B	0.249978	B
329	chr6:27623360-27623731	chr6_146_tRNAGln_CTG-	TRNAQ21	yes	3.22239	0	A	0.762961	A	0.599462	A	0.656046	A
327	chr6:27617383-27617764	chr6_147_tRNASer_AGA-	TRNAS24	yes	2.67516	0	A	0.472068	B	0.255257	B	0.331206	B
324	chr6:27581436-27581817	chr6_148_tRNASer_TGA-	TRNAS3	yes	3.57845	0	A	0.812914	A	0.216811	B	0.648528	A
318	chr6:27410598-27410970	chr6_149_tRNALys_TTT-	TRNAK8	yes	3.12199	0	A	0.436099	B	0	B	0.234465	B
273	chr6:26683627-26684016	chr6_15_tRNATyr_GTA_I+	TRNAY8	yes	2.1745	0	A	0.118644	B	0.228269	B	0.192645	B
317	chr6:27408593-27408964	chr6_150_tRNAMet_CAT-		yes	3.69165	0	A	0.90182	A	0.559427	A	0.363097	B
316	chr6:27379397-27379768	chr6_151_tRNAThr_CGT-	TRNAT5	yes	3.44668	0	A	0.630766	A	0.438121	B	0.600393	B
310	chr6:27355878-27356250	chr6_152_tRNAVal_CAC-	TRNAV21	yes	3.75803	0	A	1.32193	A	0.4975	B	0.343587	B
309	chr6:27350819-27351192	chr6_153_tRNAIle_AAT-	TRNAI17	yes	2.40439	0	A	0.121991	B	-0.133267	B	0.0824622	B
307	chr6:27313179-27313552	chr6_154_tRNAIle_AAT-	TRNAI11	yes	3.73697	1.19	A	0.977974	A	0.788496	A	0.140151	B
305	chr6:27306163-27306545	chr6_155_tRNALeu_TAA-	TRNAL10	yes	3.78958	0	A	1	A	0.703607	A	0.455679	B
303	chr6:27289452-27289824	chr6_156_tRNAArg_ACG-	TRNAR17	yes	2.97323	0.25	A	0.4975	B	0.234465	B	0.270089	B
301	chr6:27281696-27282068	chr6_157_tRNAVal_CAC-	TRNAV20	yes	1.25634	0	A	-0.0824622	B	0.115477	B	-0.169925	B
300	chr6:27252823-27253196	chr6_158_tRNAIle_AAT-	TRNAI9	yes	3.21261	0.39	A	0.980371	A	0.623437	A	0.356347	B
293	chr6:26903835-26904207	chr6_159_tRNAAla_AGC-	TRNAA21	yes	0.329308	77.83	B	-0.156119	B	0.106915	B	0.157541	B
274	chr6:26685161-26685549	chr6_16_tRNATyr_GTA_I+	TRNAY10	yes	3.92935	0	A	1.04182	A	0.866733	A	0.819428	A
291	chr6:26881600-26881972	chr6_160_tRNAAla_AGC-	TRNAA20	yes	2.782	100	A	0.342888	B	-0.187627	B	0.266939	B
290	chr6:26879119-26879491	chr6_161_tRNAAla_AGC-	TRNAA18	yes	2.12029	100	A	-0.16601	B	-0.16601	B	0.0155969	B
288	chr6:26866379-26866751	chr6_162_tRNAMet_CAT-		yes	3.17688	9.09	A	0.334419	B	0	B	0.0614005	B
285	chr6:26853084-26853457	chr6_163_tRNAIle_AAT-	TRNAI5	yes	2.89947	0.91	A	0.29956	B	0.206451	B	0.646886	B
284	chr6:26843403-26843775	chr6_164_tRNAMet_CAT-		yes	3.39544	100	A	0.584963	A	0.540568	B	0.212994	B
281	chr6:26829050-26829423	chr6_165_tRNAIle_AAT-	TRNAI4	yes	1.29956	100	A	-0.197939	B	-0.0374747	B	0.428843	B
272	chr6:26679921-26680293	chr6_166_tRNAAla_AGC-	TRNAA2	yes	3.94044	0	A	1.25239	A	1.02106	A	0.819428	A
264	chr6:26640974-26641347	chr6_167_tRNAThr_AGT-	TRNAT7	yes	3.80735	0.47	A	1.12399	A	1.25376	A	1.08964	A
262	chr6:26439501-26439872	chr6_168_tRNATrp_CCA-	TRNAW9	yes	3.50696	0	A	0.818162	A	0.479993	B	0.616259	B
261	chr6:26438358-26438729	chr6_169_tRNAMet_CAT-		yes	3.70992	0	A	1	A	0.824913	A	0.798495	A
275	chr6:26702931-26703319	chr6_17_tRNATyr_GTA_I+	TRNAY12	yes	3.41093	0	A	0.510195	B	0.540568	B	0.415037	B
257	chr6:26427159-26427530	chr6_170_tRNATrp_CCA-	TRNAW2	yes	2.91329	0	A	0.341037	B	0.263034	B	0.232661	B
256	chr6:26421181-26421552	chr6_171_tRNAMet_CAT-		yes	3.96511	0.48	A	1.02106	A	1.12199	A	0.79212	A
255	chr6:26420653-26421034	chr6_172_tRNASer_TGA-	TRNAS1	yes	3.68957	0	A	0.812373	A	0.549339	B	-0.0356239	B
254	chr6:26419804-26420175	chr6_173_tRNAGln_TTG-	TRNAQ10	yes	3.7746	0	A	1.34645	A	0.801454	A	0.584963	B
253	chr6:26419253-26419624	chr6_174_tRNAGln_TTG-	TRNAQ5	yes	3.37551	0	A	0.518467	B	0.345135	B	0.216811	B
252	chr6:26413547-26413930	chr6_175_tRNASer_GCT-	TRNAS5	yes	3.89553	0.25	A	1.35548	A	0.693897	A	0.441317	B
276	chr6:26781419-26781791	chr6_18_tRNAAla_AGC+	TRNAA6	yes	0.206451	38.46	B	-0.0374747	B	0	B	0	B
277	chr6:26790544-26790916	chr6_19_tRNAAla_AGC+	TRNAA7	yes	0.662965	48.98	A	0.0780025	B	0.353637	B	0.199309	B
250	chr6:26394583-26394954	chr6_2_tRNAMet_CAT+		yes	3.62838	1.07	A	1.11548	A	0.765535	A	1.13477	A
278	chr6:26795314-26795686	chr6_20_tRNAAla_AGC+	TRNAA8	yes	-0.269187	50	B	-0.269187	B	-0.128324	B	-0.287802	B
279	chr6:26809541-26809913	chr6_21_tRNAMet_CAT+		yes	3.18724	3.61	A	0.453718	B	-0.0317089	B	0.563901	B
280	chr6:26813435-26813807	chr6_22_tRNAAla_AGC+	TRNAA9	yes	1.32833	29.41	A	-0.206451	B	-0.0995357	B	-0.0161197	B
282	chr6:26836085-26836457	chr6_23_tRNAAla_AGC+	TRNAA12	yes	2.76755	100	A	0.222392	B	-0.182864	B	0.187627	B
283	chr6:26838566-26838938	chr6_24_tRNAAla_AGC+	TRNAA13	yes	2.24961	100	A	-0.169925	B	-0.169925	B	-0.0324215	B
286	chr6:26859747-26860119	chr6_25_tRNAAla_AGC+	TRNAA14	yes	1.80735	45.91	A	0.0740006	B	-0.0780025	B	0.0126	B
287	chr6:26860459-26860832	chr6_26_tRNAUndet_???+		yes	0.0331669	41.66	B	-0.296982	B	-0.338802	B	-0.338802	B
289	chr6:26874273-26874645	chr6_27_tRNAMet_CAT+		yes	3.34819	100	A	0.429684	B	0.451379	B	0.0435016	B
292	chr6:26888661-26889034	chr6_28_tRNAIle_AAT+	TRNAI8	yes	1.30743	100	A	-0.234465	B	-0.0365259	B	0.392317	B
294	chr6:27095954-27096347	chr6_29_tRNAIle_TAT_I+	TRNAI2	yes	3.49099	0	A	0.462972	B	0.375509	B	0.648528	A
251	chr6:26407734-26408106	chr6_3_tRNAArg_TCG+	TRNAR3	yes	3.12199	0	A	0.640458	A	0.197939	B	0.40439	B
295	chr6:27167350-27167721	chr6_30_tRNAPro_CGG+	TRNAP10	yes	3.74147	0	A	0.70044	A	0.285402	B	0.321928	B
296	chr6:27172914-27173295	chr6_31_tRNASer_GCT+	TRNAS12	yes	3.92057	0.24	A	1.09954	A	0.95818	A	0.732838	A
297	chr6:27225851-27226223	chr6_32_tRNAVal_CAC+	TRNAV15	yes	0.209453	0	B	0.0443941	B	0.0443941	B	0.169925	B
298	chr6:27233735-27234106	chr6_33_tRNAHis_GTG+	TRNAH3	yes	4.12153	0.23	A	0.97728	A	0.72792	A	0.841302	A
299	chr6:27237879-27238252	chr6_34_tRNAThr_AGT+	TRNAT14	yes	3.64725	0	A	0.667425	A	0.270089	B	0.436099	B
302	chr6:27285457-27285838	chr6_35_tRNASer_CGA+	TRNAS7	yes	1.41504	0.52	A	-0.0901978	B	0	B	0.203533	B
304	chr6:27290781-27291153	chr6_36_tRNAArg_ACG+	TRNAR26	yes	3.28065	0.17	A	0.758992	A	0.442518	B	0.387023	B
306	chr6:27311117-27311489	chr6_37_tRNAVal_AAC+	TRNAV7	yes	3.32992	0	A	0.584963	A	0.384664	B	0.0780025	B
308	chr6:27349568-27349941	chr6_38_tRNAIle_AAT+	TRNAI12	yes	-0.121991	0	B	-0.255257	B	-0.209453	B	-0.165059	B
311	chr6:27359693-27360066	chr6_39_Pseudo_AAT+	TRNAI28P	yes	0.133267	11.21	B	0.175087	B	0.255257	B	0.21716	B
258	chr6:26430875-26431247	chr6_4_tRNAArg_TCG+	TRNAR7	yes	4.17493	0	A	1.26679	A	0.930737	A	1.04439	A
312	chr6:27366234-27366606	chr6_40_tRNAVal_TAC+	TRNAV31	yes	3.64943	0	A	0.718229	A	0.331206	B	0.438121	B
313	chr6:27369500-27369873	chr6_41_Pseudo_ACT+	TRNAS32P	yes	3.848	0	A	0.793549	A	0.847997	A	0.793549	A
314	chr6:27371041-27371412	chr6_42_tRNAGln_CTG+	TRNAQ16	yes	3.60288	0	A	0.536053	A	0.232661	B	0.632268	B
315	chr6:27373604-27373985	chr6_43_tRNASer_GCT+	TRNAS13	yes	3.65862	0.29	A	1	A	0.728698	A	0.603167	B
319	chr6:27554420-27554801	chr6_44_tRNASer_AGA+	TRNAS4	yes	4.00729	2.81	A	1.51847	A	0.940294	A	1.04793	A
320	chr6:27555282-27555653	chr6_45_tRNAAsp_GTC+	TRNAD8	yes	3.43539	0	A	0.788496	A	-0.0331669	B	0.722586	A
321	chr6:27571422-27571803	chr6_46_tRNASer_AGA+	TRNAS9	yes	4.03666	2.78	A	1.38827	A	0.745427	A	1.30485	A
322	chr6:27578647-27579028	chr6_47_tRNASer_AGA+	TRNAS10	yes	3.87553	2.88	A	0.878694	A	0.68966	A	0.553598	B
323	chr6:27579352-27579723	chr6_48_tRNAAsp_GTC+	TRNAD9	yes	3.85175	0	A	0.78136	A	0.523562	B	0.378722	B
325	chr6:27595137-27595508	chr6_49_tRNAGln_CTG+	TRNAQ17	yes	3.63777	0	A	1.09192	A	1.03747	A	0.839535	A
259	chr6:26435646-26436027	chr6_5_tRNASer_AGA+	TRNAS2	yes	3.77923	2.82	A	1.05733	A	0.518467	B	0.462972	B
326	chr6:27607816-27608197	chr6_50_tRNASer_AGA+	TRNAS19	yes	1.06817	0	A	0.215729	B	0.133267	B	0.0458037	B
328	chr6:27621297-27621678	chr6_51_tRNASer_TGA+	TRNAS27	yes	3.48278	0	A	0.572579	A	0.29956	B	0.645335	B
331	chr6:27637792-27638178	chr6_52_tRNAArg_TCT_I+	TRNAR5	yes	1.57032	0	A	0	B	-0.137504	B	0.277534	B
332	chr6:27651675-27652047	chr6_53_tRNALys_TTT+	TRNAK19	yes	0.92785	0	A	-0.109624	B	-0.403356	B	-0.148099	B
338	chr6:27693964-27694337	chr6_54_tRNAThr_CGT+	TRNAT11	yes	2.91359	0	A	-0.140863	B	-0.140863	B	0.217591	B
339	chr6:27707029-27707422	chr6_55_tRNAIle_TAT_I+	TRNAI6	yes	3.22386	0	A	0.296982	B	0.296982	B	0.330149	B
341	chr6:27740374-27740749	chr6_56_tRNAPhe_GAA+	TRNAF3	yes	-0.0848889	0	B	0.040642	B	-0.129283	B	-0.222392	B
342	chr6:27744191-27744564	chr6_57_tRNAIle_AAT+	TRNAI20	yes	3.73013	0	A	0.545434	A	0.216811	B	0.249978	B
346	chr6:27758317-27758690	chr6_58_tRNAVal_CAC+	TRNAV27	yes	0.180572	0.64	B	0.180572	B	0.180572	B	0.00226561	B
348	chr6:27763796-27764169	chr6_59_tRNAIle_AAT+	TRNAI22	yes	4.11864	0	A	1.44057	A	0.777608	A	0.828786	A
260	chr6:26436197-26436569	chr6_6_tRNAArg_ACG+	TRNAR2	yes	3.71425	0	A	1.04439	A	0.906891	A	0.634206	B
350	chr6:27802302-27802675	chr6_60_tRNAThr_AGT+	TRNAT18	yes	1	0	A	-0.156119	B	0.0365259	B	-0.241008	B
353	chr6:27853493-27853864	chr6_61_tRNAMet_CAT+		yes	1.63077	0	A	0.0458037	B	0.133267	B	0.255257	B
358	chr6:28288644-28289025	chr6_62_tRNASer_GCT+	TRNAS16	yes	4.07948	0	A	1.52356	A	0.78136	A	1.45943	A
362	chr6:28613196-28613589	chr6_63_tRNAIle_TAT_I+	TRNAI21	yes	1.17509	0	A	0.0901978	B	0.215729	B	0	B
364	chr6:28664985-28665356	chr6_64_tRNAGln_TTG+	TRNAQ15	yes	4.04564	0	A	1.22827	A	0.571157	A	0.514573	B
366	chr6:28682762-28683133	chr6_65_tRNAAla_AGC+	TRNAA22	yes	3.60543	0	A	0.678072	A	0.485427	B	0.455679	B
368	chr6:28719051-28719422	chr6_66_tRNAAla_TGC+	TRNAA1	yes	3.34873	0	A	0.491853	B	0.129283	B	0.357552	B
374	chr6:28786195-28786566	chr6_67_tRNAAla_AGC+	TRNAA27	yes	2.80735	0	A	0.426265	B	0.209453	B	0.129283	B
375	chr6:28795310-28795681	chr6_68_tRNAAla_AGC+	TRNAA28	yes	2.25442	0	A	0.192645	B	0	B	0.308122	B
376	chr6:28801624-28801997	chr6_69_tRNAThr_AGT+	TRNAT21	yes	2.59128	0	A	0	B	-0.203533	B	-0.203533	B
263	chr6:26629265-26629647	chr6_7_tRNALeu_CAG+	TRNAL26	yes	3.32629	4.06	A	0.838249	A	0.628031	A	0.95793	A
378	chr6:28804921-28805292	chr6_70_tRNAAla_CGC+	TRNAA40	yes	3.67671	0	A	0.886343	A	0.788496	A	0.540568	B
381	chr6:28823350-28823722	chr6_71_tRNALys_TTT+	TRNAK29	yes	3.54057	0	A	0.510195	B	0.241008	B	0.277534	B
384	chr6:28839993-28840365	chr6_72_tRNAPhe_GAA+	TRNAF5	yes	0.889817	0	A	0.160465	B	0	B	0.160465	B
396	chr6:28956994-28957366	chr6_73_tRNAArg_CCG+	TRNAR24	yes	3.68576	0	A	0.68281	A	0.658963	A	0.980891	A
398	chr6:29016659-29017063	chr6_74_tRNALeu_CAA_I+	TRNAL28	yes	3.95693	0	A	1.654	A	1.21632	A	1.21632	A
401	chr6:29020181-29020553	chr6_75_tRNAMet_CAT+		yes	3.9098	0	A	1.31316	A	1.18442	A	1.31316	A
402	chr6:29026635-29027007	chr6_76_tRNALys_TTT+	TRNAK31	yes	3.6746	1.04	A	0.843881	A	0.668794	A	0.89782	A
405	chr6:29057805-29058176	chr6_77_tRNAGlu_CTC+	TRNAE6	yes	3.8609	0.85	A	1.10236	A	0.912537	A	1.25525	A
406	chr6:29064608-29064989	chr6_78_tRNALeu_AAG+	TRNAL20	yes	3.34577	0	A	0.616671	A	0.552541	B	0.385891	B
407	chr6:37395823-37396195	chr6_79_tRNAGln_TTG+	TRNAQ25	yes	0.209453	0	B	0.0874628	B	-0.0458037	B	0.321928	B
265	chr6:26645555-26645927	chr6_8_tRNAArg_ACG+	TRNAR10	yes	3.74979	1.14	A	0.929611	A	0.607683	A	0.780943	A
411	chr6:58257063-58257436	chr6_80_tRNAIle_AAT+	TRNAI25	yes	1.365	5.83	A	0.0848889	B	0.203533	B	0.710493	A
417	chr6:69970949-69971331	chr6_81_tRNALeu_TAA+	TRNAL18	yes	-0.175087	0	B	-0.0418202	B	0	B	0.040642	B
243	chr6:142620319-142620689	chr6_82_tRNAGly_GCC+	TRNAG29	yes	-0.165059	0	B	-0.0395284	B	0.112475	B	-0.0395284	B
244	chr6:144579227-144579609	chr6_83_tRNALeu_TAA+	TRNAL29	yes	3.24607	0	A	0.982298	A	0.708537	A	0.832273	A
245	chr6:145545402-145545773	chr6_84_tRNAGln_TTG+	TRNAQ32	yes	0.222392	0.35	B	0	B	0.0780025	B	-0.0792018	B
247	chr6:163129854-163130222	chr6_85_Pseudo_TTC-	TRNAE33P	yes	-0.0848889	0	B	-0.129283	B	0	B	-0.129283	B
246	chr6:156910588-156910962	chr6_86_Pseudo_TAC-	TRNAV37P	yes	0.0801703	0	B	0.118644	B	-0.129283	B	-0.129283	B
242	chr6:126142936-126143307	chr6_87_tRNAGlu_CTC-	TRNAE19	yes	3.35181	0	A	0.703018	A	0.274175	B	0.625993	B
418	chr6:79724579-79724951	chr6_88_Pseudo_GAA-	TRNAF15P	yes	0.215729	0	B	0.0901978	B	0.133267	B	0.0458037	B
416	chr6:58304432-58304804	chr6_89_tRNAAla_AGC-	TRNAA43	yes	0.182864	8.86	B	-0.0801703	B	-0.0801703	B	-0.165059	B
266	chr6:26646111-26646483	chr6_9_tRNAVal_CAC+	TRNAV14	yes	3.53119	1.65	A	0.664816	A	0.342888	B	0.530321	B
415	chr6:58295253-58295625	chr6_90_tRNAAla_AGC-	TRNAA42	yes	0.160465	42.16	B	0.0418202	B	0.121991	B	0	B
414	chr6:58290488-58290860	chr6_91_tRNAAla_AGC-	TRNAA41	yes	0.0356239	36	B	-0.0740006	B	-0.192645	B	-0.132104	B
413	chr6:58276301-58276673	chr6_92_tRNAMet_CAT-		yes	0.321928	73.13	B	-0.0740006	B	-0.0740006	B	-0.0365259	B
412	chr6:58272437-58272809	chr6_93_tRNAAla_AGC-	TRNAA37	yes	0.736966	69.23	A	-0.115477	B	-0.156119	B	0.0896372	B
410	chr6:58250398-58250770	chr6_94_tRNAAla_AGC-	TRNAA36	yes	3.03342	18.25	A	0.491853	B	0.643856	A	0.142958	B
409	chr6:58249686-58250058	chr6_95_tRNAAla_AGC-	TRNAA35	yes	1.94753	7.24	A	0.296982	B	-0.222392	B	0.040642	B
404	chr6:29057278-29057650	chr6_96_tRNAPhe_GAA-	TRNAF12	yes	3.71049	0	A	0.955606	A	0.683526	A	0.604263	B
403	chr6:29028871-29029243	chr6_97_tRNAMet_CAT-		yes	3.57845	0	A	0.980371	A	0.434403	B	0.490986	B
400	chr6:29019228-29019609	chr6_98_tRNALeu_AAG-	TRNAL17	yes	3.85798	2.82	A	1.18982	A	0.857981	A	1.59171	A
399	chr6:29017207-29017578	chr6_99_tRNAGln_CTG-	TRNAQ27	yes	3.51281	1.39	A	0.946229	A	0.370368	B	0.537266	B
448	chr7:98905093-98905464	chr7_1_tRNATrp_CCA+	TRNAW6	yes	0.623437	0	A	-0.0801703	B	-0.165059	B	-0.0395284	B
436	chr7:148912599-148912970	chr7_10_tRNACys_GCA+	TRNAC15	yes	0.304855	0	B	0.0824622	B	0	B	-0.0430687	B
439	chr7:148925829-148926200	chr7_11_tRNACys_GCA+	TRNAC21	yes	-0.0721498	18.75	B	-0.228269	B	-0.148099	B	-0.228269	B
440	chr7:148936250-148936621	chr7_12_tRNASer_AGA+	TRNAS28	yes	0.270089	0	B	0.121991	B	0.0418202	B	-0.0430687	B
442	chr7:148963561-148963932	chr7_13_tRNACys_GCA+	TRNAC23	yes	0.415037	5.88	B	0.222392	B	0	B	0.180572	B
444	chr7:148992698-148993069	chr7_14_tRNACys_GCA+	TRNAC26	yes	0.277534	11.76	B	0	B	0.0430687	B	0.0848889	B
446	chr7:149035543-149035914	chr7_15_tRNACys_GCA+	TRNAC28	yes	2.84918	0	A	0.270089	B	-0.0430687	B	0.371969	B
445	chr7:149019055-149019426	chr7_16_tRNACys_GCA-	TRNAC27	yes	2.81323	1.69	A	0.156119	B	0.0801703	B	0.485427	B
443	chr7:148974829-148975200	chr7_17_tRNACys_GCA-	TRNAC25	yes	0.956931	0.1	A	-0.0874628	B	0	B	0.198058	B
441	chr7:148940939-148941310	chr7_18_tRNACys_GCA-	TRNAC22	yes	-0.0418202	0	B	0.228269	B	-0.0848889	B	-0.0418202	B
438	chr7:148923088-148923459	chr7_19_tRNACys_GCA-	TRNAC20	yes	0.0848889	22.22	B	0.203533	B	0.203533	B	0.165059	B
419	chr7:128210590-128210961	chr7_2_tRNAPro_AGG+	TRNAP15	yes	3.65344	0.21	A	1.01495	A	0.437405	B	1.28077	A
437	chr7:148916947-148917318	chr7_20_tRNACys_GCA-	TRNAC19	yes	0.215729	0	B	0.215729	B	-0.0473057	B	0.0901978	B
432	chr7:148743012-148743383	chr7_21_tRNACys_GCA-	TRNAC10	yes	2.6865	0	A	0.247928	B	0.129283	B	0.643856	B
431	chr7:148705384-148705755	chr7_22_tRNACys_GCA-	TRNAC8	yes	0.331206	6.25	B	0	B	0.133267	B	0.0901978	B
430	chr7:148703633-148704004	chr7_23_tRNACys_GCA-	TRNAC6	yes	0.211504	0	B	-0.160465	B	-0.247928	B	0.14439	B
429	chr7:148684528-148684903	chr7_24_Pseudo_GTA-	TRNAY17P	yes	-0.169925	0	B	-0.263034	B	-0.0824622	B	-0.125531	B
428	chr7:148683549-148683920	chr7_25_tRNACys_GCA-	TRNAC4	yes	0.878694	0	A	0	B	0	B	0.293731	B
447	chr7:57257772-57258143	chr7_26_Pseudo_TTG-	TRNAQ48P	yes	0.160465	0	B	-0.180572	B	0	B	-0.0430687	B
420	chr7:138675836-138676208	chr7_3_tRNAArg_CCT+	TRNAR27	yes	3.61935	0	A	1	A	0.729352	A	1.19502	A
421	chr7:141149676-141150047	chr7_4_Pseudo_TTG+	TRNAQ52P	yes	-0.121991	0	B	-0.121991	B	-0.121991	B	-0.302563	B
426	chr7:148638064-148638435	chr7_5_tRNACys_GCA+	TRNAC2	yes	2.67948	2.62	A	0.392317	B	0.523562	B	0.303781	B
427	chr7:148659003-148659374	chr7_6_tRNACys_GCA+	TRNAC3	yes	0.878009	1.61	A	-0.0395284	B	-0.255257	B	-0.165059	B
433	chr7:148874414-148874785	chr7_7_tRNACys_GCA+	TRNAC11	yes	0.0901978	0	B	0.175087	B	0.255257	B	0.0458037	B
434	chr7:148884585-148884956	chr7_8_tRNACys_GCA+	TRNAC13	yes	0.197939	20	B	-0.0874628	B	0.160465	B	0.197939	B
435	chr7:148885916-148886288	chr7_9_tRNATyr_GTA+	TRNAY11	yes	0.192645	3.03	B	-0.129283	B	-0.0418202	B	0.040642	B
449	chr8:11830639-11831010	chr8_1_Pseudo_CTC+	TRNAE28P	yes	0.137504	6.25	B	0.0473057	B	0	B	0	B
450	chr8:124238501-124238873	chr8_10_tRNAMet_CAT-	TRNAM11	yes	3.83072	0	A	1.47063	A	0.824913	A	1.06054	A
463	chr8:96350911-96351292	chr8_11_tRNASer_AGA-	TRNAS20	yes	3.47883	2.72	A	0.98457	A	0.802963	A	0.820451	A
457	chr8:66771936-66772323	chr8_12_tRNATyr_GTA_I-	TRNAY5	yes	0.156119	0	B	-0.0848889	B	0.0801703	B	-0.0418202	B
455	chr8:47859053-47859427	chr8_13_Pseudo_TAA-	TRNAL41P	yes	-0.0418202	0	B	-0.175087	B	-0.0418202	B	-0.222392	B
454	chr8:32992038-32992409	chr8_14_Pseudo_TTG-	TRNAQ43P	yes	-0.0848889	0	B	-0.175087	B	0.0801703	B	0.296982	B
453	chr8:18164333-18164702	chr8_2_Pseudo_TTT+	TRNAE17	yes	0.612977	0	A	0	B	0	B	0.304855	B
456	chr8:59667202-59667572	chr8_3_tRNAGlu_CTC+	TRNAE35P	yes	-0.0458037	0	B	0.0443941	B	0.169925	B	0.285402	B
458	chr8:67188006-67188398	chr8_4_tRNATyr_GTA_I+	TRNAY6	yes	3.98584	0	A	1.70044	A	1	A	1.50779	A
459	chr8:67188627-67188921	chr8_5_tRNATyr_GTA_I+	TRNAY15	yes	3.70736	0	A	1.18982	A	1	A	0.807355	A
460	chr8:67188922-67189200	chr8_6_tRNAAla_AGC+	TRNAA39	yes	3.7037	0	A	1.32193	A	0.912537	A	0.467126	B
461	chr8:70234744-70235118	chr8_7_Pseudo_CTC+		yes	0.0430687	0	B	0.0848889	B	0.0848889	B	0.0848889	B
464	chr8:99222488-99222856	chr8_8_tRNAUndet_???+		yes	0.0430687	0	B	0.165059	B	0.0848889	B	0.125531	B
451	chr8:124339756-124340128	chr8_9_Pseudo_GAA-	TRNAF14P	yes	0	0	B	-0.129283	B	-0.175087	B	0.0801703	B
472	chr9:19393846-19394220	chr9_1_tRNAMet_CAT+	TRNAM10	yes	-0.203533	0	B	-0.293731	B	-0.247928	B	-0.0780025	B
466	chr9:112000474-112000846	chr9_2_tRNAArg_TCG+	TRNAR6	yes	0.321928	2.91	B	0.169925	B	0.0874628	B	0.0078028	B
467	chr9:114656660-114657058	chr9_3_tRNATrp_CCA_I+	TRNAW8	yes	-0.133267	0	B	-0.133267	B	-0.0874628	B	0.121991	B
469	chr9:130142026-130142416	chr9_4_tRNAArg_TCT_I-	TRNAR12	yes	1.82597	0	A	0.0430687	B	0.241008	B	0.415037	B
468	chr9:125695193-125695565	chr9_5_tRNAGln_CTG-	TRNAQ6	yes	0.277534	0	B	-0.137504	B	0.0430687	B	-0.0443941	B
476	chr9:76707660-76708031	chr9_6_tRNAAsp_GTC-	TRNAD2	yes	0	29.13	B	-0.0430687	B	-0.0874628	B	-0.00169923	B
471	chr9:14423788-14424159	chr9_7_tRNAHis_GTG-	TRNAH5	yes	3.58496	0.35	A	0.630766	A	0.600393	A	0.755462	A
474	chr9:5084935-5085306	chr9_8_tRNAGln_TTG-	TRNAQ9	yes	-0.0430687	0	B	-0.0430687	B	0	B	-0.0430687	B
717	chrX:55223241-55223612	chrX_1_Pseudo_TTG+	TRNAQ40P	yes	-0.0901978	0	B	0	B	0.0430687	B	0.125531	B
718	chrX:55224330-55224704	chrX_2_tRNALeu_TAA-	TRNAL37	yes	-0.160465	0	B	-0.160465	B	-0.0780025	B	-0.293731	B
716	chrX:51322702-51323073	chrX_3_Pseudo_CTC-	TRNAE37P	yes	-0.0430687	0	B	0.0824622	B	0	B	-0.180572	B
711	chrX:18602800-18603172	chrX_4_tRNAVal_TAC-	TRNAV19	yes	3.33744	0	A	0.721284	A	0.182864	B	0.597902	B
714	chrX:3843121-3843494	chrX_5_tRNAIle_GAT-		yes	-0.133267	100	B	-0.133267	B	-0.0874628	B	-0.0142139	B
713	chrX:3804692-3805065	chrX_6_tRNAIle_GAT-		yes	-0.133267	100	B	-0.133267	B	-0.0874628	B	-0.0142139	B
712	chrX:3766268-3766641	chrX_7_tRNAIle_GAT-		yes	-0.0931094	100	B	-0.0458037	B	0	B	-0.0151069	B
719	chrY:8299990-8300364	chrY_1_Pseudo_TTG-	TRNAQ35P	yes	0	0	B	0	B	0	B	0	B
543	chr14:20168280-20168658	tRNA-Tyr-TAC_tRNA_tRNA	tRNA-Tyr-TAC_tRNA_tRNA	yes	2.80735	0	A	0.040642	B	-0.0418202	B	-0.0418202	B
66	chr1:159161961-159162535	MER50_LTR_ERV1	tRNA-Glu-GAA_tRNA_tRNA	yes	1.37197	0	A	0.160465	B	0.371969	B	0.270089	B
715	chrX:47546865-47547264	LOR1-int_LTR_ERV1|+|chrX:47546800-47547200|47547065|40	tRNA-Gly-GGG_tRNA_tRNA	no	1.72128	0	A	0.0384741	B	0.0759489	B	0	B

## Sheet: RN5S
					Scores: log2((IP tag counts +30)/(Input tag counts+30))
Number	Locus position with link (NCBI36/hg18)	Locus annotation	HUGO nomenclature	In Canella et al. 2010?	POLR3D (cut off = 0.585)	POLR3D % score from tags with multiple matches	POLR3D score Below (B) or Above (A) cutoff (0.585)	POLR3G (cut off = 0.519)	POLR3G score Below (B) or Above (A) cutoff (0.519)	POLR3GL (cut off = 0.553)	POLR3GL score Below (B) or Above (A) cutoff (0.553)	BDP1	BDP1 score Below (B) or Above (A) cutoff (0.647)
132	chr1:226812484-226812906	blat|5S_rRNA-related	blat|5S_rRNA-related	yes	2.358	100	A	0.10561	B	0.219781	B	0.381698	B
133	chr1:226814725-226815147	blat|5S_rRNA-related	blat|5S_rRNA-related	yes	2.358	100	A	0.10561	B	0.219781	B	0.381698	B
134	chr1:226816966-226817388	blat|5S_rRNA-related	blat|5S_rRNA-related	yes	2.358	100	A	0.10561	B	0.219781	B	0.381698	B
135	chr1:226819207-226819629	blat|5S_rRNA-related	blat|5S_rRNA-related	yes	2.38785	100	A	0.142604	B	0.256775	B	0.367743	B
136	chr1:226821448-226821870	blat|5S_rRNA-related	blat|5S_rRNA-related	yes	2.358	100	A	0.10561	B	0.219781	B	0.381698	B
137	chr1:226823663-226824085	blat|5S_rRNA-related	blat|5S_rRNA-related	yes	2.38785	100	A	0.142604	B	0.256775	B	0.367743	B
138	chr1:226825884-226826305	RN5S|(5S_rRNA)	RN5S (5S_rRNA)	yes	2.38785	100	A	0.142604	B	0.256775	B	0.366034	B
139	chr1:226828126-226828547	RN5S|(5S_rRNA)	RN5S (5S_rRNA)	yes	2.35443	100	A	0.10561	B	0.219781	B	0.380048	B
140	chr1:226830365-226830786	RN5S|(5S_rRNA)	RN5S (5S_rRNA)	yes	2.45095	91.47	A	0.0901978	B	0.349584	B	0.538054	B
141	chr1:226832607-226833028	RN5S|(5S_rRNA)	RN5S (5S_rRNA)	yes	2.35443	100	A	0.10561	B	0.219781	B	0.380048	B
142	chr1:226834848-226835269	RN5S|(5S_rRNA)	RN5S (5S_rRNA)	yes	2.358	99.67	A	0.122484	B	0.219781	B	0.380048	B
143	chr1:226837088-226837509	RN5S|(5S_rRNA)	RN5S (5S_rRNA)	yes	2.35443	100	A	0.10561	B	0.219781	B	0.380048	B
144	chr1:226839313-226839734	RN5S|(5S_rRNA)	RN5S (5S_rRNA)	yes	2.35443	100	A	0.10561	B	0.219781	B	0.380048	B
145	chr1:226841554-226841975	RN5S|(5S_rRNA)	RN5S (5S_rRNA)	yes	2.37281	100	A	0.123989	B	0.23816	B	0.398426	B
146	chr1:226843785-226844206	RN5S|(5S_rRNA)	RN5S (5S_rRNA)	yes	2.31741	100	A	0.247928	B	0.285402	B	0.369565	B
147	chr1:226846026-226846447	RN5S|(5S_rRNA)	RN5S (5S_rRNA)	yes	2.31741	100	A	0.247928	B	0.285402	B	0.369565	B
148	chr1:226848257-226848678	RN5S|(5S_rRNA)	RN5S (5S_rRNA)	yes	2.35443	100	A	0.10561	B	0.219781	B	0.380048	B
475	chr9:66197811-66198232	5S_rRNA-related	5S_rRNA-related	yes	2.04836	4.2	A	0.0324215	B	-0.0331669	B	-0.10188	B
482	chr10:23326044-23326436	5S_rRNA-related	5S_rRNA-related	no	1.81816	0	A	-0.203533	B	0	B	-0.0780025	B
510	chr12:103042993-103043383	5S_rRNA-related	5S_rRNA-related	yes	0.688056	68.13	A	0.152003	B	0.0395284	B	0.165898	B

## Sheet: Other pol III genes
					Scores: log2((IP tag counts +30)/(Input tag counts+30))
Number	Locus position with link (NCBI36/hg18)	Locus annotation	HUGO nomenclature	In Canella et al. 2010?	POLR3D (cut off = 0.585)	POLR3D % score from tags with multiple matches	POLR3D score Below (B) or Above (A) cutoff (0.585)	POLR3G (cut off = 0.519)	POLR3G score Below (B) or Above (A) cutoff (0.519)	POLR3GL (cut off = 0.553)	POLR3GL score Below (B) or Above (A) cutoff (0.553)	BDP1	BDP1 score Below (B) or Above (A) cutoff (0.647)
181	chr2:47415397-47416516	BC200|chr2:47415697-47416216	BCYRN1	no	1.9386	15.27	A	-0.192645	B	-0.192645	B	-0.0634975	B
212	chr5:135443926-135444346	HVG2|(hsa-mir-886)	VTRNA2-1_MIR886_(hsa-mir-886)	yes	3.61203	0	A	1.06413	A	0.750022	A	1	A
213	chr5:140070894-140071292	VTRNA1-1|(HVG-1)	VTRNA1-1 (HVG-1)	yes	3.80464	0	A	1	A	0.452512	B	0.839535	A
214	chr5:140078544-140078932	VTRNA1-2|(HVG-2)	VTRNA1-2 (HVG-2)	yes	4.05528	0.88	A	1.39232	A	0.954196	A	1.23071	A
215	chr5:140085777-140086165	VTRNA1-3|(HVG-3)	VTRNA1-3 (HVG-3)	yes	3.87529	0	A	1.26303	A	0.722466	A	0.807355	A
408	chr6:52968226-52968858	7SK_RNA	RN7SK_(7SK_RNA)	yes	4.02342	30.06	A	1.14684	A	0.85561	A	0.53842	B
422	chr7:148269362-148269746	hY5_RNA	RNY5_MIR1975_(hsa-mir-1975)	yes	3.40839	0	A	0.667425	A	0.160465	B	0.612977	B
423	chr7:148291189-148291582	hY4_RNA	RNY4	yes	3.64725	0.77	A	0.956931	A	0.866733	A	0.467126	B
424	chr7:148311629-148312030	hY3_RNA	RNY3	yes	3.54844	5.14	A	1.01792	A	0.632268	A	0.604862	B
425	chr7:148315011-148315423	hY1_RNA	RNY1	yes	3.67624	0	A	1.03847	A	0.545434	B	0.434403	B
470	chr9:136019232-136019657	RNU6ATAC	RNU6ATAC	yes	3.56204	0.6	A	0.980371	A	0.67319	A	1.05733	A
473	chr9:35647599-35648164	RNaseMRP_RNA	RMRP_(RNaseMRP_RNA)	yes	4.08166	0	A	1.38606	A	0.966833	A	0.769387	A
537	chr14:19880920-19881560	RNaseP_RNA	RPPH1_(RNaseP_RNA)	yes	3.80735	0	A	0.392317	B	0.426265	B	0.882643	A
556	chr14:31740851-31741257	U6-7	RNU6_(U6-7)	yes	1.95174	38.22	A	-0.0780025	B	0.0740006	B	0.0992902	B
557	chr14:31741970-31742376	U6-8	RNU6_(U6-8)	yes	4.07094	9.11	A	0.853159	A	0.660514	A	1.28817	A
558	chr14:49122897-49123496	RN7SL1|(SRP_RNA)	RN7SL1 (SRP_RNA)	yes	4.16189	30.07	A	1.51096	A	1.36457	A	1.20372	A
559	chr14:49389927-49390627	RN7SL3|(SRP_RNA)	RN7SL3 (SRP_RNA)	yes	1.8893	41.67	A	-0.174029	B	0.0951572	B	0.137007	B
560	chr14:49398868-49399467	RN7SL2|(SRP_RNA)	RN7SL2 (SRP_RNA)	yes	3.99799	32.4	A	1.09311	A	1.04731	A	0.969763	A
572	chr15:65919180-65919587	U6-1	RNU6_(U6-1)	yes	3.72311	9.82	A	0.889817	A	0.4975	B	0.788007	A
695	chr19:844333-844740	U6-9	RNU6_(U6-9)	yes	3.57225	10.93	A	0.941897	A	0.211504	B	0.675872	A
697	chr19:972370-972777	U6-2	RNU6_(U6-2)	yes	4.13443	7.95	A	1.24793	A	1.08746	A	1.05977	A

## Sheet: SNAR
					Scores: log2((IP tag counts +30)/(Input tag counts+30))
Number	Locus position with link (NCBI36/hg18)	Locus annotation	HUGO nomenclature	In Canella et al. 2010?	POLR3D (cut off = 0.585)	POLR3D % score from tags with multiple matches	POLR3D score Below (B) or Above (A) cutoff (0.585)	POLR3G (cut off = 0.519)	POLR3G score Below (B) or Above (A) cutoff (0.519)	POLR3GL (cut off = 0.553)	POLR3GL score Below (B) or Above (A) cutoff (0.553)	BDP1	BDP1 score Below (B) or Above (A) cutoff (0.647)
679	chr19:53113222-53113922	SNAR-A1|SNAR-A2	SNAR-A1|SNAR-A2	yes	0.253757	100	B	-0.530515	B	-0.331206	B	-0.145352	B
681	chr19:53128979-53129679	SNAR-A1|SNAR-A2	SNAR-A1|SNAR-A2	yes	0.199309	100	B	-0.532495	B	-0.317482	B	-0.181543	B
678	chr19:53102476-53103176	SNAR-A12|SNAR-A13	SNAR-A12|SNAR-A13	yes	0.172181	100	B	-0.421827	B	-0.195551	B	-0.0330066	B
682	chr19:53139720-53140420	SNAR-A12|SNAR-A13	SNAR-A12|SNAR-A13	yes	0.0919225	100	B	-0.440573	B	-0.247928	B	-0.0870897	B
680	chr19:53118534-53119234	SNAR-A3-A11|SNAR-A14	SNAR-A3-A11|SNAR-A14	yes	0.109229	95.4	B	-0.720846	B	-0.26628	B	-0.0232453	B
684	chr19:55287276-55287976	SNAR-A3-A11|SNAR-A14	SNAR-A3-A11|SNAR-A14	yes	0.236606	100	B	-0.825321	B	-0.354431	B	-0.158571	B
685	chr19:55292614-55293314	SNAR-A3-A11|SNAR-A14	SNAR-A3-A11|SNAR-A14	yes	0.179821	100	B	-0.937536	B	-0.498251	B	-0.217237	B
686	chr19:55295678-55296378	SNAR-A3-A11|SNAR-A14	SNAR-A3-A11|SNAR-A14	yes	0.179821	100	B	-0.937536	B	-0.498251	B	-0.217237	B
687	chr19:55298774-55299474	SNAR-A3-A11|SNAR-A14	SNAR-A3-A11|SNAR-A14	yes	0.18133	100	B	-0.949374	B	-0.503574	B	-0.253219	B
688	chr19:55301834-55302534	SNAR-A3-A11|SNAR-A14	SNAR-A3-A11|SNAR-A14	yes	0.297681	100	B	-0.752072	B	-0.375509	B	-0.119499	B
689	chr19:55307194-55307894	SNAR-A3-A11|SNAR-A14	SNAR-A3-A11|SNAR-A14	yes	0.312787	100	B	-0.736966	B	-0.380031	B	-0.119986	B
690	chr19:55312535-55313235	SNAR-A3-A11|SNAR-A14	SNAR-A3-A11|SNAR-A14	yes	0.309855	99.31	B	-0.777608	B	-0.375509	B	-0.151208	B
691	chr19:55317894-55318594	SNAR-A3-A11|SNAR-A14	SNAR-A3-A11|SNAR-A14	yes	0.331206	100	B	-0.731804	B	-0.31034	B	-0.149073	B
692	chr19:55323214-55323914	SNAR-A3-A11|SNAR-A14	SNAR-A3-A11|SNAR-A14	yes	0.315776	100	B	-0.747234	B	-0.32577	B	-0.138439	B

## Sheet: SINEs
					Scores: log2((IP tag counts +30)/(Input tag counts+30))
Number	Locus position with link (NCBI36/hg18)	Locus annotation	HUGO nomenclature	In Canella et al. 2010?	POLR3D (cut off = 0.585)	POLR3D % score from tags with multiple matches	POLR3D score Below (B) or Above (A) cutoff (0.585)	POLR3G (cut off = 0.519)	POLR3G score Below (B) or Above (A) cutoff (0.519)	POLR3GL (cut off = 0.553)	POLR3GL score Below (B) or Above (A) cutoff (0.553)	BDP1	BDP1 score Below (B) or Above (A) cutoff (0.647)
200	chr3:191624995-191625394	AluSx_SINE_Alu|+|chr3:191625200-191625600|191625195|35	AluSx_SINE_Alu	no	2.32193	0.14	A	0.285402	B	0.357552	B	0.285402	B
201	chr3:197355750-197356450	FLAM_C_SINE_Alu	FLAM_C_SINE_Alu	yes	1.98868	0	A	0.426265	B	0.584963	A	0.321928	B
207	chr4:186270429-186270828	AluSx_SINE_Alu|+|chr4:186270400-186270800|186270629|29	AluSx_SINE_Alu	no	1.92376	0	A	0.270089	B	0.338802	B	-0.0430687	B
209	chr4:46816001-46816726	GABRB1_Intronic(AluSp)	AluSp_SINE_ALu	yes	2.44057	3.06	A	0	B	0	B	0.192645	B
210	chr4:54039861-54040311	LNX1_Intronic(Alu_FLAM_C)	FLAM_C_SINE_Alu	no	2.56359	0	A	0.270089	B	0.556393	A	0.121991	B
220	chr5:171663379-171663778	AluSq_SINE_Alu|+|chr5:171663600-171664000|171663579|50	AluSq_SINE_Alu	no	2.1745	0	A	0.0801703	B	0.0801703	B	0.192645	B
221	chr5:172155181-172155632	MIRb_SINE_MIR	MIRb_SINE_MIR	no	1.2824	0	A	-0.165059	B	-0.255257	B	0.182864	B
249	chr6:26381595-26381994	AluSq_SINE_Alu|+|chr6:26381600-26382000|26381795|33	AluSq_SINE_Alu	no	2.19555	0	A	0.175087	B	0.215729	B	0.600393	B
465	chr9:111507645-111508149	MIR_SINE_MIR	MIR_SINE_MIR	no	3.01381	0	A	0.174029	B	0.174029	B	0.358454	B
477	chr10:103796334-103796733	AluSp_SINE_Alu|+|chr10:103796400-103796800|103796534|39	AluSp_SINE_Alu	no	1.58496	0	A	0.0395284	B	0.222392	B	0.415037	B
478	chr10:114657630-114658029	AluSp_SINE_Alu|+|chr10:114657600-114658000|114657830|40	AluSp_SINE_Alu	no	2.22827	0	A	0.118644	B	-0.0418202	B	0.228269	B
483	chr10:25223524-25223941	MIR_SINE_MIR	MIR_SINE_MIR	yes	1.02046	0	A	0	B	-0.0418202	B	0	B
486	chr10:50265290-50265700	AluSx_SINE_Alu	AluSx_SINE_Alu	yes	1.66742	0.25	A	0.0824622	B	0.197939	B	0.0418202	B
527	chr13:108345795-108346317	MIR_SINE_MIR	MIR_SINE_MIR	no	2.42321	0	A	0.415037	B	0.165059	B	0.125531	B
529	chr13:32128590-32129262	PDS5B_Intronic|AluSx	AluSx_SINE_Alu	no	1.7855	1.4	A	0.0740006	B	0.0740006	B	0	B
581	chr16:22217034-22217734	POLR3E_Intronic|MIR_repeat	MIR_SINE_MIR	yes	4.06793	0	A	1.04064	A	1.02046	A	0.455679	B
582	chr16:29258669-29259410	RUNDC2C_Intronic|AluSg	AluSg_SINE_Alu	no	1.30875	30.73	A	-0.249978	B	-0.211504	B	0.136447	B
614	chr16:9044013-9044713	MIRb_SINE_MIR	MIRb_SINE_MIR	yes	1.87801	0	A	0.182864	B	0.375509	B	0.345135	B
617	chr17:17804084-17804826	AluJb_SINE_Alu	AluJb_SINE_Alu	yes	2.18107	0	A	0.551015	A	0.158698	B	0	B
661	chr18:41355783-41356300	MIRb_SINE_MIR	MIRb_SINE_MIR	no	2.52725	0	A	0.467126	B	0.234465	B	0.338802	B
673	chr19:44715175-44715574	AluJb_SINE_Alu|+|chr19:44715200-44715600|44715375|41	AluJb_SINE_Alu	no	1.32971	0	A	0.0759489	B	0.0759489	B	-0.0395284	B
693	chr19:55332054-55332453	Alu_SINE_Alu|+|chr19:55332000-55332400|55332254|32	Alu_SINE_Alu	no	0.745817	51.33	A	-0.437405	B	-0.349942	B	0.00559525	B
701	chr20:35385921-35386320	AluJo_SINE_Alu|+|chr20:35386000-35386400|35386121|50	AluJo_SINE_Alu	no	2.27753	0	A	0.313158	B	0.0848889	B	0.165059	B
706	chr20:6675357-6675922	MIR_SINE_MIR	MIR_SINE_MIR	no	1.98185	0	A	-0.0365259	B	0	B	-0.192645	B
624	chr17:32511009-32511456	SRP_RNA-related	AluJo_SINE_Alu	no	1.84549	0	A	0.169925	B	0.285402	B	0.129283	B
616	chr17:17804028-17804615	TOM1L2_Intronic	MIRb_SINE_MIR	no	2.2854	0	A	0.584963	A	0.137504	B	-0.112475	B

## Sheet: Other
					Scores: log2((IP tag counts +30)/(Input tag counts+30))
Number	Locus position with link (NCBI36/hg18)	Locus annotation	HUGO nomenclature	In Canella et al. 2010?	POLR3D (cut off = 0.585)	POLR3D % score from tags with multiple matches	POLR3D score Below (B) or Above (A) cutoff (0.585)	POLR3G (cut off = 0.519)	POLR3G score Below (B) or Above (A) cutoff (0.519)	POLR3GL (cut off = 0.553)	POLR3GL score Below (B) or Above (A) cutoff (0.553)	BDP1	BDP1 score Below (B) or Above (A) cutoff (0.647)
26	chr1:146219155-146219547	OTHER	OTHER	yes	2.79481	0.92	A	0.381871	B	0.125531	B	0.525461	B
29	chr1:146242075-146242467	OTHER2|(RP3TR2)	OTHER2	yes	3.60543	0.23	A	1.08017	A	0.598637	A	0.716207	A
122	chr1:17072151-17072550	HTR044912.1.482(+)|+|chr1:17072000-17072400|17072351|106	HTR044912.1.482	no	2.30066	46.61	A	0.0687128	B	0.573185	A	0.257158	B
149	chr1:229540087-229540486	NM_175876|EXOC8(-)|+|chr1:229540000-229540400|229540287|41	NM_175876	no	1.69744	0	A	0	B	0.148099	B	-0.121991	B
178	chr2:3501532-3501931	NM_018269|ADI1(-)|+|chr2:3501600-3502000|3501732|41	NM_018269	no	2.35755	0	A	0.0874628	B	0.209453	B	0.209453	B
203	chr3:46992817-46993216	NM_144716|CCDC12(-)|+|chr3:46992800-46993200|46993017|50	NM_144716	no	1.58496	0	A	-0.0443941	B	0.381871	B	0.125531	B
452	chr8:17396915-17397314	OTHER_10|+|chr8:17396800-17397200|17397115|42	OTHER_10	no	1.66742	0	A	0.0824622	B	0	B	-0.0430687	B
462	chr8:90485249-90485944	HUERS-P1_LTR_ERV1	HUERS-P1_LTR_ERV1	yes	2.08092	0	A	-0.0374747	B	0.0721498	B	0.415037	B
484	chr10:27429279-27429678	NM_014915|ANKRD26(-)|+|chr10:27429200-27429600|27429479|51	NM_014915	no	1.73306	0	A	0.0384741	B	0.2824	B	0.148099	B
491	chr11:35504595-35504987	OTHER1|(RP3TR1)	OTHER1	yes	3.6095	0	A	0.843274	A	0.371969	B	0.436099	B
506	chr11:67984015-67984407	tRNA-derived	tRNA-derived	yes	3.77479	0	A	1.16993	A	0.672425	A	1	A
622	chr17:24302625-24303024	HTR015644.17.711(-)|+|chr17:24302800-24303200|24302825|34	HTR015644.17.711	no	2.17509	0	A	0.438121	B	0.175087	B	0.630766	B
709	chr22:35915316-35921603	MER41B-int_LTR_ERV1	MER41B-int_LTR_ERV1	yes	1.30666	0.29	A	-0.194816	B	0.22456	B	-0.247928	B

## Sheet: Only in Canella 2010
Locus position with link (UCSC HG18)	Locus annotation
chr3:156669545-156675571	L1PA2_LINE_L1
chr13:98857606-98857913	AluSq_SINE_Alu
chr20:41713686-41713999	AluSx_SINE_Alu
chr22:39206693-39206862	AluSc_SINE_Alu
chr19:308075-308378	AluSg_SINE_Alu
chr13:59794387-59794681	AluSx_SINE_Alu
chrX:28134829-28140827	L1PA2_LINE_L1
chr18:8016571-8016971	AluSz_SINE_Alu
chr2:44316756-44317070	AluSx_SINE_Alu
chr5:17582025-17582117	OTHER
chr1:149116080-149116376	AluSq_SINE_Alu
chr4:147027827-147027908	MIRb_SINE_MIR
chr2:91063672-91063887	AluSg/x_SINE_Alu
chr2:62672622-62672934	AluY_SINE_Alu
chr3:89092838-89093137	AluSq_SINE_Alu
chr3:184657673-184657960	AluY_SINE_Alu
chr19:61692261-61692570	AluSx_SINE_Alu
chr3:25588811-25589211	RARB
chr1:174166096-174166396	AluSp_SINE_Alu
chr2:62672622-62672934	AluY_SINE_Alu
chr2:86677885-86678181	AluSx_SINE_Alu
chr3:89092838-89093137	AluSq_SINE_Alu
chr3:150878051-150878305	AluSx_SINE_Alu
chr3:171543568-171543860	AluSc_SINE_Alu
chr3:184657673-184657960	AluY_SINE_Alu
chr4:189459671-189459974	AluY_SINE_Alu
chr6:54553434-54553735	AluYa5_SINE_Alu
chr6:111670152-111670454	AluJo_SINE_Alu
chr7:80410298-80410444	AluY_SINE_Alu
chrX:16200840-16201136	AluSq_SINE_Alu
chrX:118041959-118042264	AluY_SINE_Alu
chr12:37448586-37448878	AluY_SINE_Alu
chr12:86075962-86076268	AluSp_SINE_Alu
chr13:97582718-97582929	AluSg/x_SINE_Alu
chr16:3141121-3141447	AluSp_SINE_Alu
chr17:19845240-19845419	AluY_SINE_Alu
chr18:7169578-7169865	AluSc_SINE_Alu
chr18:35895841-35896139	AluY_SINE_Alu
chr19:61692261-61692570	AluSx_SINE_Alu
chr22:40773335-40773541	AluSg/x_SINE_Alu
chr3:17874770-17877887	AluSq_SINE_Alu
chr4:93339580-93343600	AluSz6_SINE_Alu
chr9:74193541-74193738	MIRb_SINE_MIR
chr10:103796436-103796510	MIR_SINE_MIR
chr1:142731555-142731647	OTHER
chr16:33864005-33864097	OTHER
chr5:34225985-34226077	non-coding RNA
chr5:34227345-34227437	OTHER
chr6:27668275-27668367	Alujr4_SINE_alu
chr12:122737851-122738251	AluSg_SINE_Alu
chr3:29366371-29366771	L1MC4a_LINE_L1
chr7:6117791-6118191	AluY_SINE_Alu
chr9:15700491-15700891	FLAM_A_SINE_Alu
chr3:59026492-59026806	AluYb8_SINE_Alu
chr14:49341216-49341522	AluSx_SINE_Alu
chr1:16775265-16775357	MIRb_SINE_MIR
chr10:135339265-135339965	DUX4 (LOC653545)
