# Supplementary material for: Gene duplication and neofunctionalization: POLR3G and POLR3GL
Source: HighWire-hosted journal article supplement (doi:10.1101/gr.161570.113), 2013-10-09
Supplement: TableS3.xlsx [file TableS3.xlsx]

## Sheet: All
	Locus description			Scores: log2((IP tag counts +30)/(Input tag counts+30))																Mean of scores in biological replicates									LIMMA analysis on POLR3D scores, liver vs hepa			LIMMA analysis on POLR3G/POLR3GL score ratios in liver versus hepa
				POLR3D								POLR3G				POLR3GL				POLR3D			POLR3G			POLR3GL			POLR3D			POLR3G/POLR3GL
Number	Locus position with link (NCBI37/mm9)	Locus annotation	Discussed in Canella et al. 2012 ?	Liver Rep 1 score (cut off = 1.1806)	Liver Rep 1 % score from tags with multiple matches	Liver Rep2 score (cut off = 0.9758)	Liver Rep 2 % score from tags with multiple matches	Hepa 1-6 Rep 1 score (cut off = 1.6897)	Hepa 1-6 Rep 1 % score from tags with multiple matches	Hepa 1-6 Rep2 score (cut off = 1.7737)	Hepa 1-6 Rep 2 % score from tags with multiple matches	Liver Rep 1 score (cut off = 1.2630)	Liver Rep 2 score (cut off = 1.1375)	Hepa 1-6 Rep 1 score (cut off = 1.7737)	Hepa 1-6 Rep 2 score (cut off = 1.6605	Liver Rep 1 score (cut off = 1.0931)	Liver Rep 2 score (cut off = 1.0238)	Hepa 1-6 Rep 1 score (cut off = 1.6457)	Hepa 1-6 Rep 2 score (cut off = 1.6308)	Liver mean score (cut off = 1.0782)	Hepa 1-6 mean score (cut off = 1.7317)	Below cut off in both POLR3D liver and POLR3D Hepa 1-6 scores?	Liver mean score (cut off = 1.2003)	Hepa 1-6 mean score cut off = 1.7171)	Below cut off in both POLR3G liver and POLR3G Hepa 1-6 scores?	Liver mean score (cut off = 1.0585)	Hepa 1-6 mean score (cut off = 1.6382)	Below cut off in both POLR3GL liver and POLR3GL Hepa 1-6 scores?	LogFC POLR3D Hepa 1-6 versus liver	adj.P.Val POLR3D Hepa 1-6 versus liver	POLR3D Up/Down in Hepa 1-6 versus liver	LogFC POLR3G/POLR3GL ratio in Hepa 1-6 versus liver	adj.P.Val POLR3G/POLR3GL ratio	POLR3G/POLR3GL ratio Up/Down in Hepa 1-6 versus liver
1	chr1:3129253-3129352	L1_Mm_L1_LINE+	no	2.18401	97	2.07831	97.18	-0.222318	91.29	-0.184021	96.1	2.12751	0.38066	0.108861	0.181799	0.418517	0.0694265	0.174058	0.0878735	2.13116	-0.20317	NO	1.25408	0.14533		0.243972	0.130966		-2.33433	2.34363304311171e-08	Down	-0.995748	0.000480455	Down
2	chr1:34491657-34491728	n-Te21|chr1_1547_tRNAGlu_TTC-	yes	4.5145	0	4.37848	0	5.7383	0	6.23046	0	2.22882	1.47038	3.73881	3.82479	2.54953	2.40373	2.50502	2.79746	4.44649	5.98438	NO	1.8496	3.7818	NO	2.47663	2.65124	NO	1.53789	2.22858718501428e-05	Up	1.75759	2.7053283949042e-10	Up
3	chr1:51376031-51376130	NA_1	no	1.25475	0	1.67946	0	1.34572	0	0.920819	0	-0.201745	0.0907973	0.764014	0.629718	0.0363414	0.134715	0.337233	0.632002	1.4671	1.13327	NO	-0.0554737	0.696866	YES	0.0855282	0.484618	YES	-0.33383	0.315892	Null	0.35325	0.299876	Null
4	chr1:74863321-74863391	n-Tg11|chr1_1392_tRNAGly_GCC-	yes	2.56038	0	2.30881	0	3.58684	0	4.24901	0	0.361388	0.147082	2.08678	2.08389	0.767638	0.899552	1.18416	1.42323	2.4346	3.91792	NO	0.254235	2.08533	YES	0.833595	1.30369	YES	1.48333	5.34815032993031e-05	Up	1.361	1.00193256916601e-06	Up
5	chr1:78294370-78294441	n-Tp1|chr1_284_tRNAPro_AGG+	yes	-0.287126	0	-0.0992368	0	0.324743	0	0.114568	0	0.491061	0.172828	-0.124864	0.323945	-0.115999	-0.312669	0.157695	0.174883	-0.193181	0.219655	YES	0.331945	0.0995406	YES	-0.214334	0.166289	YES	0.412837	0.190623	Null	-0.613027	0.0459963	Null
6	chr1:112801324-112801396	n-Tk7|chr1_1268_tRNALys_CTT-	yes	-0.450086	0	-0.0880061	0	0.282616	0	-0.0690528	0	-0.727159	0.090996	0.272947	0.0228113	-0.489073	-0.0311259	0.407306	0.311799	-0.269046	0.106782	YES	-0.318082	0.147879	YES	-0.260099	0.359553	YES	0.375827	0.246607	Null	-0.153691	0.695093	Null
7	chr1:120246867-120247052	B2_Mm2_SINE_B2+	yes	1.77771	0	2.15773	0	-0.166345	0	-0.275851	0	0.497304	0.414465	-0.668803	-0.322438	0.980206	0.970688	-0.684058	-0.681326	1.96772	-0.221098	NO	0.455885	-0.495621	YES	0.975447	-0.682692	YES	-2.18882	9.45654732061458e-08	Down	0.706634	0.0180411	Null
8	chr1:130008960-130009059	B2_Mm2_B2_SINE+	no	1.98177	0	1.87267	0	3.3919	0	4.09294	0	0.815492	0.932727	2.36084	1.96634	0.915182	0.879956	1.54765	1.49211	1.92722	3.74242	NO	0.874109	2.16359	NO	0.897569	1.51988	YES	1.8152	3.45311800683187e-06	Up	0.66717	0.0270237	Null
9	chr1:134930539-134930611	n-Tk26|chr1_485_tRNALys_TTT+	yes	3.86955	0	4.3536	0	5.53519	0	6.3387	0	1.59243	1.91997	3.75224	3.80298	2.02856	2.57354	2.63885	2.90869	4.11158	5.93695	NO	1.7562	3.77761	NO	2.30105	2.77377	NO	1.82537	5.94742989595476e-06	Up	1.54869	2.15745724749372e-08	Up
10	chr1:134930904-134930976	n-Tk25|chr1_1184_tRNALys_TTT-	yes	2.57759	0	2.88801	0	5.58332	0	6.25234	0	0.65282	0.929074	3.80786	3.93981	1.07619	1.41384	2.82332	3.01368	2.7328	5.91783	NO	0.790947	3.87384	YES	1.24502	2.9185	NO	3.18502	4.20055997941708e-10	Up	1.40941	3.85343641424543e-07	Up
11	chr1:155305794-155305866	n-Ti13|chr1_583_tRNAIle_TAT+	yes	0.178288	0	-0.0116857	0	0.456366	0	0.882025	0	0.853824	-0.215355	0.804755	0.534073	0.313548	0.0816316	0.680129	0.432002	0.0833012	0.669196	YES	0.319235	0.669414	YES	0.19759	0.556065	YES	0.585894	0.0676451	Null	-0.00829622	0.990271	Null
12	chr1:167571765-167571836	n-Tp2|chr1_672_tRNAPro_AGG+	yes	4.3144	0	4.47851	0	5.63085	0	5.90136	0	1.83188	1.82343	4.13469	3.98226	2.57388	2.44762	2.65519	2.76743	4.39646	5.76611	NO	1.82765	4.05848	NO	2.51075	2.71131	NO	1.36965	7.46603793972756e-05	Up	2.03027	9.01463082956122e-13	Up
13	chr1:167572402-167572473	n-Tp8|chr1_1022_tRNAPro_CGG-	yes	4.18633	0	4.66853	0	4.71083	0	5.03082	0	1.87492	1.82166	3.49262	3.40835	2.40079	2.48188	2.12428	2.48213	4.42743	4.87082	NO	1.84829	3.45048	NO	2.44134	2.30321	NO	0.44339	0.173555	Null	1.74032	3.88699457967984e-10	Up
14	chr1:172930087-172930186	B2_Mm2_SINE-	no	0.309962	0	0.395925	0	2.27222	0	2.60262	0	-0.407124	0.0921812	1.10289	1.16018	-0.14387	-0.0269618	0.234859	0.562449	0.352944	2.43742	NO	-0.157471	1.13153	YES	-0.0854158	0.398654	YES	2.08447	1.81023132924129e-07	Up	0.804934	0.00597357	Null
15	chr1:172964073-172964146	n-Tn6|chr1_1006_tRNAAsn_GTT-	yes	5.00446	0	5.17973	0	6.42855	0	6.65095	0	2.64349	2.29598	4.61113	4.67474	2.93674	3.29444	3.5097	3.79032	5.09209	6.53975	NO	2.46973	4.64293	NO	3.11559	3.65001	NO	1.44766	3.59058256935781e-05	Up	1.63878	3.24021938058743e-09	Up
16	chr1:172967160-172967231	n-Td4|chr1_1005_tRNAAsp_GTC-	yes	4.43274	0	4.53474	0	6.30309	0	6.89242	0	2.22103	2.16996	4.63008	4.47521	3.06589	2.95233	3.2661	3.21065	4.48374	6.59775	NO	2.19549	4.55265	NO	3.00911	3.23837	NO	2.11401	2.3872130382356e-07	Up	2.12789	1.25655709185952e-13	Up
17	chr1:172968128-172968199	n-Tg21|chr1_1004_tRNAGly_TCC-	yes	4.46849	0	4.91627	0	5.69767	0	6.31278	0	2.27299	2.2865	3.92368	3.76477	2.69958	2.97604	2.338	2.58845	4.69238	6.00523	NO	2.27974	3.84423	NO	2.83781	2.46323	NO	1.31284	0.000256528	Up	1.93906	5.07527702790515e-12	Up
18	chr1:172968745-172968827	n-Tl15|chr1_698_tRNALeu_CAG+	yes	4.97625	0	5.56284	0	6.511	0	6.99107	0	2.45427	2.47588	4.64283	4.63224	3.11523	3.38281	3.35079	3.6525	5.26955	6.75103	NO	2.46507	4.63754	NO	3.24902	3.50165	NO	1.48148	6.11259859106079e-05	Up	1.91984	7.60244681178187e-12	Up
19	chr1:172975116-172975186	n-Tg12|chr1_699_tRNAGly_GCC+	yes	5.00977	0	5.09649	0	0.646608	0	0.702903	0	2.48191	2.19735	0.093385	0.322979	3.23286	3.27944	0.374135	0.180019	5.05313	0.674756	NO	2.33963	0.208182	NO	3.25615	0.277077	NO	-4.37837	9.06858747460922e-13	Down	0.847619	0.00359043	Up
20	chr1:172994295-172994366	n-Te5|chr1_1002_tRNAGlu_CTC-	yes	2.23688	77.58	1.68888	70.66	2.34276	62.08	2.77681	63.78	0.610192	-0.213703	0.434334	0.678448	0.529898	0.228774	0.140678	0.472143	1.96288	2.55978	NO	0.198245	0.556391	YES	0.379336	0.30641	YES	0.596905	0.0718752	Null	0.431072	0.187698	Null
21	chr1:172994830-172994901	n-Tg20|chr1_1001_tRNAGly_TCC-	yes	2.11651	57.16	1.75281	53.22	1.4911	33.17	1.91783	34.18	0.264337	-0.203978	-0.220907	0.00355192	0.24143	0.0717979	-0.0972499	-0.0674436	1.93466	1.70446	NO	0.0301793	-0.108677	YES	0.156614	-0.0823467	YES	-0.230197	0.497876	Null	0.100104	0.809819	Null
22	chr1:172995489-172995560	n-Td3|chr1_1000_tRNAAsp_GTC-	yes	1.74011	33.03	1.62175	34.07	1.96824	98.19	2.31364	99.32	0.0480266	0.165534	0.311462	0.584053	0.257885	0.385993	0.0868936	0.158367	1.68093	2.14094	NO	0.10678	0.447757	YES	0.321939	0.122631	YES	0.460012	0.145896	Null	0.540285	0.0856732	Null
23	chr1:172996115-172996197	n-Tl18|chr1_701_tRNALeu_CAG+	yes	0.495827	48.78	0.0333621	45.02	2.82234	54.14	3.18282	58.98	-0.102482	-0.793593	0.978538	1.26212	-0.328144	-0.591936	0.393682	0.890804	0.264594	3.00258	NO	-0.448038	1.12033	YES	-0.46004	0.642243	YES	2.73798	3.47522690919968e-09	Up	0.466082	0.148045	Null
24	chr1:172996762-172996832	n-Tg17|chr1_702_tRNAGly_GCC+	yes	2.26516	63.01	1.86331	57.14	4.43491	99.68	5.00405	99.48	0.674794	-0.0993037	2.17504	2.75068	0.766312	0.508819	1.45347	1.942	2.06424	4.71948	NO	0.287745	2.46286	YES	0.637565	1.69773	NO	2.65525	7.90808898903982e-09	Up	1.11495	8.1246482241712e-05	Up
25	chr1:173001923-173001994	n-Te8|chr1_999_tRNAGlu_CTC-	yes	2.37282	95.56	1.67062	95.56	2.57485	98.25	3.02005	99.75	0.45155	-0.28023	0.427154	0.735863	0.542447	0.128936	0.04197	0.583092	2.02172	2.79745	NO	0.0856604	0.581508	YES	0.335691	0.312531	YES	0.775727	0.0228434	Null	0.519008	0.100586	Null
26	chr1:173002465-173002536	n-Tg24|chr1_998_tRNAGly_TCC-	yes	2.20368	100	1.80645	100	1.31468	100	1.67032	100	0.329269	-0.243133	-0.0355409	0.171725	0.394418	0.243653	0.164805	0.162099	2.00507	1.4925	NO	0.0430681	0.0680919	YES	0.319036	0.163452	YES	-0.512566	0.112302	Null	0.180608	0.6339	Null
27	chr1:173003124-173003195	n-Td7|chr1_997_tRNAAsp_GTC-	yes	1.16647	100	0.92985	100	2.23707	100	2.69347	100	-0.224999	-0.158842	0.439582	0.728123	-0.14243	0.134003	0.226012	0.264652	1.04816	2.46527	NO	-0.19192	0.583852	YES	-0.00421324	0.245332	YES	1.41711	6.44260674592753e-05	Up	0.526228	0.0951606	Null
28	chr1:173003750-173003832	n-Tl19|chr1_703_tRNALeu_CAG+	yes	0.59272	88.4	-0.0374818	76.07	2.54841	99.87	3.04457	100	-0.0350394	-0.810178	0.664821	1.09668	-0.224991	-0.536322	0.220511	0.76946	0.277619	2.79649	NO	-0.422609	0.880751	YES	-0.380656	0.494985	YES	2.51887	2.61316591491652e-08	Up	0.427718	0.19138	Null
29	chr1:173004433-173004503	n-Tg18|chr1_704_tRNAGly_GCC+	yes	2.04182	60.57	1.42347	57.66	4.17984	82.12	4.72737	83.55	0.472891	-0.155386	1.97115	2.52771	0.572591	0.188088	1.35075	1.71723	1.73265	4.45361	NO	0.158753	2.24943	YES	0.380339	1.53399	YES		7.90808898903982e-09	Up	0.937019	0.00110813	Up
30	chr1:173009537-173009608	n-Te7|chr1_996_tRNAGlu_CTC-	yes	2.32842	84.82	1.72582	83.14	2.45494	100	2.89777	99.91	0.435935	-0.343431	0.389074	0.646317	0.436917	0.180822	0.0303962	0.529756	2.02712	2.67635	NO	0.0462516	0.517695	YES	0.30887	0.280076	YES	0.649233	0.0523025	Null	0.500237	0.115874	Null
31	chr1:173010079-173010150	n-Tg23|chr1_995_tRNAGly_TCC-	yes	2.20368	100	1.80645	100	1.31468	100	1.67032	100	0.329269	-0.243133	-0.0355409	0.171725	0.394418	0.243653	0.164805	0.162099	2.00507	1.4925	NO	0.0430681	0.0680919	YES	0.319036	0.163452	YES	-0.512566	0.112302	Null	0.180608	0.6339	Null
32	chr1:173010738-173010809	n-Td6|chr1_994_tRNAAsp_GTC-	yes	1.16647	100	0.92985	100	2.23707	100	2.69347	100	-0.224999	-0.158842	0.439582	0.728123	-0.14243	0.134003	0.226012	0.264652	1.04816	2.46527	NO	-0.19192	0.583852	YES	-0.00421324	0.245332	YES	1.41711	6.44260674592753e-05	Up	0.526228	0.0951606	Null
33	chr1:173011364-173011446	n-Tl20|chr1_705_tRNALeu_CAG+	yes	0.59969	83.61	0.0750608	78.9	2.46722	96.72	2.93474	97.3	-0.0323752	-0.839844	0.577342	1.05663	-0.413872	-0.399861	0.299987	0.692359	0.337375	2.70098	NO	-0.43611	0.816987	YES	-0.406867	0.496173	YES	2.3636	5.64173988314235e-08	Up	0.350057	0.305125	Null
34	chr1:173012007-173012077	n-Tg19|chr1_706_tRNAGly_GCC+	yes	1.98124	61.13	1.36334	59.55	4.19279	97.53	4.8252	97.02	0.55992	-0.409301	2.0702	2.49948	0.715772	0.239315	1.35568	1.78724	1.67229	4.50899	NO	0.0753092	2.28484	YES	0.477544	1.57146	YES	2.8367	4.81663655878547e-09	Up	1.11562	8.06133254366679e-05	Up
35	chr1:173031969-173032051	n-Tl21|chr1_993_tRNALeu_CAG-	yes	4.88339	0	4.7533	0	4.4763	0	4.80541	0	2.62937	2.15667	3.31296	3.55306	3.19094	3.02228	2.3805	2.15663	4.81834	4.64086	NO	2.39302	3.43301	NO	3.10661	2.26857	NO	-0.177487	0.60387	Null	1.87803	2.05105348261001e-11	Up
36	chr1:173032502-173032573	n-Td5|chr1_707_tRNAAsp_GTC+	yes	3.38058	0	3.84672	0	5.19746	0	5.493	0	1.37188	1.43364	3.20404	3.43602	1.7737	2.10105	2.11144	2.46729	3.61365	5.34523	NO	1.40276	3.32003	NO	1.93737	2.28937	NO	1.73158	4.74847708669167e-06	Up	1.56528	1.5478083542778e-08	Up
37	chr1:173032887-173032958	n-Tg22|chr1_708_tRNAGly_TCC+	yes	4.81343	0	4.98573	0	5.97494	0	6.4022	0	2.64583	2.37815	4.01195	4.0308	2.9171	2.96902	2.63097	2.93374	4.89958	6.18857	NO	2.51199	4.02137	NO	2.94306	2.78236	NO	1.28899	0.000184958	Up	1.67009	1.66885789125233e-09	Up
38	chr1:173033174-173033245	n-Te6|chr1_709_tRNAGlu_CTC+	yes	4.86993	0	4.87045	0	5.98838	0	6.4434	0	2.70218	2.04938	4.09248	4.00577	3.04602	2.8164	2.62036	2.87076	4.87019	6.21589	NO	2.37578	4.04912	NO	2.93121	2.74556	NO	1.3457	0.000110729	Up	1.85899	3.07871578924606e-11	Up
39	chr1:173041574-173041646	n-Tv14|chr1_710_tRNAVal_CAC+	yes	3.944	0	4.04317	0	3.77482	0	4.52351	0	1.89608	1.62589	2.6864	2.67894	2.24931	2.30783	1.61269	1.47807	3.99358	4.14916	NO	1.76099	2.68267	NO	2.27857	1.54538	NO	0.155582	0.671963	Null	1.65487	2.3511034707151e-09	Up
40	chr1:173073622-173073789	NA_2	no	1.96981	4.14	2.60674	4.64	1.0865	2.38	1.5784	2.21	0.668934	0.213182	0.370514	-0.0768777	0.926357	1.27936	-0.388714	-0.0715029	2.28828	1.33245	NO	0.441058	0.146818	YES	1.10286	-0.230109	NO	-0.955827	0.00551881	Null	1.03873	0.000256358	Up
41	chr1:173599570-173599642	n-Th1|chr1_717_tRNAHis_ATG+	yes	-0.267609	10.58	0.0450456	7.55	-0.156771	9.72	-0.248278	8.91	-0.492337	0.157661	0.156004	0.202107	-0.214437	0.30939	-0.41161	0.0934343	-0.111281	-0.202524	YES	-0.167338	0.179055	YES	0.0474765	-0.159088	YES	-0.091243	0.801736	Null	0.552958	0.0773514	Null
42	chr1:175320460-175320533	n-Tr20|chr1_730_tRNAArg_TCT+	yes	-0.429032	0	-0.417818	0	4.17829	0	4.72301	0	-0.464026	-0.178568	2.19108	2.35846	-0.477998	-0.251298	1.22592	1.61261	-0.423425	4.45065	NO	-0.321297	2.27477	NO	-0.364648	1.41926	YES	4.87408	4.70307837872257e-13	Up	0.81216	0.00548825	Null
43	chr1:180241842-180241941	B2_Mm2_B2_SINE-	no	2.09681	0	1.45556	0	0.0343008	0	-0.0481446	0	0.544415	0.0205335	0.66421	0.0614869	1.03584	0.775408	0.029981	0.204934	1.77618	-0.00692189	NO	0.282474	0.362848	YES	0.905625	0.117457	YES	-1.7831	3.82718804232444e-06	Down	0.868542	0.00273803	Up
44	chr1:183986139-183986220	n-Ts15|chr1_791_tRNASer_GCT+	yes	-0.144226	0	-0.23488	0	-0.73092	0	-0.365746	0	-0.588946	-0.00525802	-0.173404	-0.831557	-0.109855	-0.182224	-0.0186249	-0.804836	-0.189553	-0.548333	YES	-0.297102	-0.502481	YES	-0.146039	-0.411731	YES	-0.35878	0.263062	Null	0.0603129	0.88831	Null
45	chr1:190765285-190765358	n-Tn3|chr1_814_tRNAAsn_GTT+	yes	-0.315238	2.6	0.165617	0.5	-0.234329	4.48	-0.618337	9.51	-0.339909	0.518329	0.286498	0.0498586	-0.379693	0.0609621	-0.0840426	-0.163038	-0.0748109	-0.426333	YES	0.0892102	0.168178	YES	-0.159365	-0.12354	YES	-0.351522	0.290776	Null	0.0431429	0.925492	Null
46	chr2:6997286-6997385	NA_3	no	2.97755	97.18	2.95112	93.1	4.42775	99.58	4.86936	99.3	1.19324	1.03221	2.10565	2.39686	1.28165	1.50101	1.5489	1.94081	2.96434	4.64856	NO	1.11273	2.25126		1.39133	1.74486		1.68422	5.63465211446677e-06	Up	0.785004	0.00754601	Null
47	chr2:18508671-18508744	n-Tn9|chr2_1947_tRNAAsn_GTT-	yes	4.70286	0	4.75192	0	6.24791	0	6.83298	0	2.41034	1.79515	4.27461	4.21982	2.73598	2.85258	3.13305	3.1555	4.72739	6.54044	NO	2.10275	4.24721	NO	2.79428	3.14428	NO	1.81305	2.5586863880029e-06	Up	1.79447	1.23709249952033e-10	Up
48	chr2:20821504-20821603	LSU-rRNA_Hsa_rRNA_rRNA+	no	1.21629	87	1.41093	89.89	0.519831	93.55	0.832453	91.66	0.178838	-0.288987	0.0367422	0.325205	-0.00842055	-0.0923249	0.732934	0.899783	1.31361	0.676142	NO	-0.0550745	0.180974		-0.0503727	0.816359		-0.637467	0.0442229	Null	-0.630683	0.0390156	Null
49	chr2:27395325-27395450	Rnu6atac|U6atac-	yes	4.72478	0	4.47614	0	6.65192	0	7.13525	0	2.56461	2.19784	4.88232	4.90067	2.99637	2.74261	3.5442	3.79404	4.60046	6.89359	NO	2.38123	4.89149	NO	2.86949	3.66912	NO	2.29313	6.01891077796863e-08	Up	1.71063	7.2796535543816e-10	Up
50	chr2:57034489-57034560	n-Ta27|chr2_263_tRNAAla_CGC+	yes	4.51317	0	5.24963	0	6.22527	0	6.89819	0	2.34798	2.48274	4.27302	4.29855	2.89047	3.45119	3.06821	3.27831	4.8814	6.56173	NO	2.41536	4.28578	NO	3.17083	3.17326	NO	1.68033	2.23696387791012e-05	Up	1.86799	2.54662176682056e-11	Up
51	chr2:57034805-57034875	n-Tg29|chr2_1747_tRNAGly_GCC-	yes	4.26302	0	4.68102	0	6.61929	0	7.42663	0	1.70401	1.76142	4.79195	4.87598	2.3791	2.62623	3.63284	3.60234	4.47202	7.02296	NO	1.73272	4.83397	NO	2.50267	3.61759	NO	2.55094	3.02483445594246e-08	Up	1.98632	2.01293639718532e-12	Up
52	chr2:78964614-78964713	B2_Mm1t_B2_SINE+	no	0.679332	9.25	0.433097	9.27	4.75792	15.05	5.57441	14.35	0.449545	0.139058	3.03935	3.09516	0.136622	-0.00524632	1.86778	2.12378	0.556214	5.16617	NO	0.294302	3.06725	YES	0.0656878	1.99578	NO	4.60995	1.70861245081537e-12	Up	0.84286	0.00380435	Up
53	chr2:80479746-80479845	B1_Mus1_Alu_SINE+	no	0.439947	0	0.368795	0	2.89959	0	3.36867	0	-0.235588	-0.127958	1.60145	1.54032	-0.0494896	0.361192	1.05978	0.805834	0.404371	3.13413	NO	-0.181773	1.57089	YES	0.155851	0.932805	YES	2.72976	2.73884115063968e-09	Up	0.975706	0.000641826	Up
54	chr2:91078023-91078122	B2_Mm1a_B2_SINE+	no	1.61058	0	1.48297	0	2.66541	0	3.43957	0	-0.166635	0.393966	1.73152	1.71052	0.433521	0.60769	1.44255	1.66244	1.54678	3.05249	NO	0.113665	1.72102	NO	0.520606	1.5525	YES	1.50571	5.30622605391684e-05	Up	0.575464	0.0641995	Null
55	chr2:113929103-113929174	n-Td2|chr2_510_tRNAAsp_GTC+	yes	-0.289498	0	-0.303306	0	-0.588751	0	-0.781453	0	-0.240701	-0.302591	-0.393228	-0.56859	-0.614263	-0.162028	-0.299929	-0.710013	-0.296402	-0.685102	YES	-0.271646	-0.480909	YES	-0.388146	-0.504971	YES	-0.3887	0.21694	Null	-0.0924382	0.824031	Null
56	chr2:118819929-118820028	B3A_B2_SINE-	no	0.194452	0	-0.129347	0	3.63772	0	4.22517	0	-0.282365	-0.249919	1.91871	2.15768	-0.34514	-0.0381869	1.37771	1.32542	0.0325527	3.93145	NO	-0.266142	2.0382	NO	-0.191663	1.35156	YES	3.8989	2.0884166029509e-11	Up	0.761111	0.00980687	Null
57	chr2:118872486-118872567	n-Ts21|chr2_1509_tRNASer_GCT-	yes	5.16131	0	5.58791	0	6.23104	0	6.55998	0	2.93733	2.45906	4.38933	4.4972	3.41979	3.65908	3.26846	3.4322	5.37461	6.39551	NO	2.6982	4.44327	NO	3.53943	3.35033	NO	1.0209	0.0022198	Up	1.93417	5.67286549614185e-12	Up
58	chr2:118881889-118881962	n-Ti12|chr2_1506_tRNAIle_GAT-	yes	0.191846	0	-0.339722	0	-0.476087	0	-0.499332	0	-0.0755614	-0.139849	-0.870867	-0.351772	-0.0898673	-0.00768593	-0.930695	-0.500451	-0.073938	-0.48771	YES	-0.107705	-0.611319	YES	-0.0487766	-0.715573	YES	-0.413772	0.202663	Null	0.163183	0.675151	Null
59	chr2:122059558-122059657	B1_Mus2_Alu_SINE-	no	1.01025	0	1.40026	0	3.63675	0	3.97463	0	0.0470212	0.175089	1.9119	1.94662	0.240475	0.348142	1.21566	1.00287	1.20525	3.80569	NO	0.111055	1.92926	YES	0.294309	1.10927	YES	2.60044	7.11536068396287e-09	Up	1.00325	0.000429377	Up
60	chr2:122201230-122201301	n-Th4|chr2_1432_tRNAHis_GTG-	yes	4.30835	6.21	5.08104	6.1	5.26885	4.37	5.65094	3.42	2.35523	2.54877	3.55839	3.51019	2.69774	3.51265	2.44124	2.84845	4.69469	5.45989	NO	2.452	3.53429	NO	3.1052	2.64484	NO	0.765199	0.0257126	Null	1.54264	2.45069834587661e-08	Up
61	chr2:122203099-122203170	n-Th3|chr2_1431_tRNAHis_GTG-	yes	4.82394	5.14	5.32222	4.77	6.00729	2.88	6.42413	2.2	2.99768	2.67	4.07619	4.20443	3.3893	3.79287	2.89822	3.31746	5.07308	6.21571	NO	2.83384	4.14031	NO	3.59109	3.10784	NO	1.14263	0.000900486	Up	1.78972	1.36612805895216e-10	Up
62	chr2:122203704-122203775	n-Th5|chr2_586_tRNAHis_GTG+	yes	4.93538	0	5.80838	0	6.166	0	6.39892	0	2.81512	3.0067	4.31608	4.44571	3.13126	4.06108	3.27926	3.71969	5.37188	6.28246	NO	2.91091	4.3809	NO	3.59617	3.49947	NO	0.910583	0.00916078	Null	1.56668	1.5153950670589e-08	Up
63	chr2:154878649-154878748	B1F2_Alu_SINE-	no	1.23442	0	1.31762	0	0.0694893	0	-0.289879	0	0.944201	0.585257	-0.13548	-0.0706745	0.456832	0.634356	0.0765781	0.0838421	1.27602	-0.110195	NO	0.764729	-0.103077	YES	0.545594	0.0802101	YES	-1.38621	6.83031175276738e-05	Down	-0.402423	0.223021	Null
64	chr2:164681329-164681428	B2_Mm2_B2_SINE+	no	2.65003	0	2.52762	0	-0.0569726	0	0.319599	0	0.657211	0.953435	0.0346297	0.217574	1.47472	1.28057	0.0439177	-0.0383425	2.58883	0.131313	NO	0.805323	0.126102	YES	1.37765	0.0027876	NO	-2.45751	1.39240189968425e-08	Down	0.695639	0.0202999	Null
65	chr2:173043603-173043702	B1_Mus2_Alu_SINE+	no	1.66219	0	1.81575	0	-0.0737941	0	-0.0382267	0	0.492697	0.440154	-0.47877	-0.0420839	0.409272	0.890175	-0.4347	-0.179361	1.73897	-0.0560104	NO	0.466426	-0.260427	YES	0.649724	-0.30703	YES	-1.79498	1.53320519092731e-06	Down	0.229902	0.525967	Null
66	chr2:180926179-180926278	B2_Mm1t_B2_SINE-	no	1.39262	1.55	1.26339	1.88	1.23047	2.47	1.40337	2.66	0.239057	0.112337	0.255541	0.39669	0.450272	0.276947	0.644709	0.327588	1.32801	1.31692	NO	0.175697	0.326115	YES	0.36361	0.486149	YES	-0.0110886	0.980574	Null	0.0278794	0.964158	Null
67	chr3:3123740-3123812	n-Tk1|chr3_1_tRNALys_CTT+	yes	-0.387314	0	-0.0232551	0	0.0115557	0	-0.0476669	0	-0.549153	-0.110779	-0.184696	-0.0443102	-0.0906812	0.290395	-0.416977	-0.0276769	-0.205284	-0.0180556	YES	-0.329966	-0.114503	YES	0.0998569	-0.222327	YES	0.187229	0.583113	Null	0.537647	0.0873496	Null
68	chr3:3149493-3149565	n-Tk9|chr3_2_tRNALys_CTT+	yes	-0.382481	0	-0.166084	0	0.0502109	0	0.0515036	0	-0.616274	0.00640617	-0.0105227	-0.0805951	-0.79383	0.100225	-0.232342	0.242274	-0.274282	0.0508573	YES	-0.304934	-0.0455589	YES	-0.346803	0.00496604	YES	0.32514	0.308163	Null	-0.0923936	0.824031	Null
69	chr3:18281478-18281577	L1Md_A_L1_LINE+	no	2.51021	42.05	2.30756	49.01	0.0701559	48.4	0.169416	50.53	2.23003	0.469362	0.407782	0.322592	0.590299	0.365573	0.368404	0.203985	2.40889	0.119786	NO	1.3497	0.365187		0.477936	0.286194		-2.2891	3.59641304732736e-08	Down	-0.792766	0.00688078	Null
70	chr3:19527959-19528031	n-Tr3|chr3_1040_tRNAArg_ACG-	yes	4.10328	0	4.46348	0	5.13592	0	5.68594	0	1.76241	1.70034	3.18513	3.36717	2.2476	2.69177	1.98308	2.50235	4.28338	5.41093	NO	1.73138	3.27615	NO	2.46968	2.24272	NO	1.12755	0.00103605	Up	1.77174	1.9984581351666e-10	Up
71	chr3:19528355-19528447	n-Ty1|chr3_27_tRNATyr_GTA_I+	yes	4.29909	0	4.61798	0	5.35779	0	5.81361	0	2.03477	1.84616	3.36584	3.55303	2.31794	2.84578	2.50036	2.61936	4.45853	5.5857	NO	1.94046	3.45944	NO	2.58186	2.55986	NO	1.12717	0.000895784	Up	1.54097	2.51908836168099e-08	Up
72	chr3:19528782-19528870	n-Ty2|chr3_28_tRNATyr_GTA_I+	yes	5.26743	0	5.11092	0	6.32326	0	6.7257	0	2.90144	2.12947	4.33712	4.38895	3.22779	3.11392	3.1803	3.46786	5.18917	6.52448	NO	2.51545	4.36304	NO	3.17085	3.32408	NO	1.3353	0.000117757	Up	1.69435	1.0215733170718e-09	Up
73	chr3:19528995-19529067	n-Ta14|chr3_29_tRNAAla_AGC+	yes	5.32714	0	5.28243	0	6.41126	0	6.80529	0	3.00539	2.36156	4.42832	4.46591	3.41039	3.25096	3.24737	3.51994	5.30478	6.60828	NO	2.68347	4.44711	NO	3.33068	3.38365	NO	1.3035	0.000149497	Up	1.71067	7.2796535543816e-10	Up
74	chr3:24061947-24062029	n-Tl13|chr3_1026_tRNALeu_CAG-	yes	-0.149502	0	-0.171919	0	-0.19708	0	0.351856	0	-0.343909	0.0699297	-0.105302	-0.496507	-0.237646	-0.0030238	0.0715863	-0.273317	-0.160711	0.0773885	YES	-0.13699	-0.300904	YES	-0.120335	-0.100865	YES	0.238099	0.480111	Null	-0.183384	0.628714	Null
75	chr3:27052969-27053068	NA_4	no	2.77168	0	2.03908	0	-0.154885	0	0.185928	0	0.087419	-0.583731	-1.01262	-0.689758	0.680762	-0.322778	-0.540814	0.15555	2.40538	0.0155213	NO	-0.248156	-0.851187	YES	0.178992	-0.192632	YES	-2.38986	6.38547319397799e-08	Down	-0.231407	0.52434	Null
76	chr3:30500192-30500264	n-Tv8|chr3_48_tRNAVal_AAC+	yes	5.10162	0	5.44774	0	6.38877	0	6.86649	0	3.02648	2.91748	4.54986	4.51372	3.3465	3.72199	3.23249	3.45769	5.27468	6.62763	NO	2.97198	4.53179	NO	3.53424	3.34509	NO	1.35295	0.000129601	Up	1.74897	3.20450754996254e-10	Up
77	chr3:51162276-51162347	n-Tp17|chr3_92_tRNAPro_TGG+	yes	2.62721	0	2.51676	0	4.78278	0	5.20915	0	0.523471	0.572837	3.01825	3.27547	1.11704	0.917255	2.07169	2.22827	2.57199	4.99597	NO	0.548154	3.14686	YES	1.01715	2.14998	NO	2.42398	1.92284961570193e-08	Up	1.46588	1.2043917004964e-07	Up
78	chr3:51163329-51163400	n-Tp5|chr3_93_tRNAPro_AGG+	yes	3.24452	0	2.69666	0	5.09074	0	5.59605	0	0.741918	1.00219	2.983	3.04779	1.65317	1.01826	1.81673	2.002	2.97059	5.3434	NO	0.872055	3.0154	YES	1.33571	1.90936	NO	2.37281	6.01891077796863e-08	Up	1.56969	1.42942454004871e-08	Up
79	chr3:58506340-58506439	B2_Mm2-B2_SINE-	no	0.159715	0	0.236733	0	3.44045	0	3.96135	0	-0.117376	0.170691	2.08819	2.35138	0.0371443	0.29882	1.54254	1.71236	0.198224	3.7009	NO	0.0266574	2.21979	NO	0.167982	1.62745	YES	3.50267	6.18363185653383e-11	Up	0.733659	0.0133595	Null
80	chr3:59278848-59278919	n-Tv9|chr3_928_tRNAVal_CAC-	yes	0.0392374	0	0.32684	0	0.606538	0	0.589592	0	-0.267289	0.115796	0.654937	0.547456	0.0496913	0.184425	0.613958	0.590556	0.183039	0.598065	YES	-0.0757467	0.601196		0.117058	0.602257	YES	0.415026	0.188586	Null	0.191744	0.611128	Null
81	chr3:84032933-84033003	n-Tg14|chr3_878_tRNAGly_GCC-	yes	1.58736	0	0.968417	0	3.71566	0	4.46706	0	0.339454	-0.00263628	2.06666	2.30952	0.458281	-0.19756	1.07397	1.35406	1.27789	4.09136	NO	0.168409	2.18809		0.13036	1.21401	YES	2.81347	7.68202531354254e-09	Up	0.936026	0.00112096	Up
82	chr3:90279782-90279853	n-Tm11|chr3_792_tRNAMetInit_CAT-	yes	4.73073	0	5.101	0	5.56799	0	5.96704	0	2.58013	2.45246	3.85759	3.93732	3.02836	3.23814	2.63924	3.00963	4.91586	5.76752	NO	2.51629	3.89745	NO	3.13325	2.82443	NO	0.851655	0.00930743	Null	1.68998	1.12045596964911e-09	Up
83	chr3:94499511-94499610	B1_Mus2_Alu_SINE-	no	2.15422	1.04	1.33656	3.34	-0.252505	11.36	-0.370132	0	0.247977	0.227774	-0.209466	-0.318696	0.70799	0.167083	-0.723279	-0.285152	1.74539	-0.311318	NO	0.237875	-0.264081	YES	0.437536	-0.504215	YES	-2.05671	6.98411945398729e-07	Down	0.439795	0.178564	Null
84	chr3:94739234-94739333	B2_Mm2_B2_SINE-_and_ID_ID_SINE-	no	1.89703	9.93	1.15387	12.89	-0.425096	9.9	-0.417127	9.91	0.843682	-0.0377586	-0.424765	-0.532194	0.526604	0.454283	-0.258463	-0.726943	1.52545	-0.421111	NO	0.402962	-0.478479	YES	0.490443	-0.492703	YES	-1.94656	1.27995734464586e-06	Down	0.101705	0.80545	Null
85	chr3:96115177-96115247	n-Tg2|chr3_282_tRNAGly_CCC+	yes	0.0374523	0	0.0501135	0	-0.284499	0	-0.44522	0	-0.25086	0.225604	-0.41869	-0.505179	-0.0903465	-0.198749	-0.896956	-1.0083	0.0437829	-0.36486	YES	-0.012628	-0.461935		-0.144548	-0.952626	YES	-0.408642	0.191551	Null	0.358772	0.292239	Null
86	chr3:96125997-96126070	n-Tn4|chr3_283_tRNAAsn_GTT+	yes	1.46528	0	0.571001	0	0.817591	0	1.45144	0	0.243691	0.261726	0.193086	0.459288	0.677454	0.209272	0.170767	0.259541	1.01814	1.13451	YES	0.252709	0.326187	YES	0.443363	0.215154	YES	0.116372	0.773445	Null	0.301688	0.383234	Null
87	chr3:96136663-96136735	n-Tv18|chr3_284_tRNAVal_CAC+	yes	2.04501	0	1.18011	0	1.40885	0	2.19791	0	0.497378	-0.141715	0.559433	0.805846	0.902088	0.0226464	0.0181744	0.263407	1.61256	1.80338	NO	0.177831	0.68264		0.462367	0.140791	YES	0.190819	0.634114	Null	0.826385	0.00467486	Up
88	chr3:96138538-96138611	n-Tn5|chr3_757_tRNAAsn_GTT-	yes	0.182438	4.85	0.216018	3.27	-0.367003	0.93	-0.133196	1.38	0.346758	-0.197999	-0.811718	-0.742537	0.0680925	-0.260063	-0.503927	-0.186617	0.199228	-0.250099	YES	0.0743796	-0.777127	YES	-0.0959854	-0.345272	YES	-0.449328	0.150736	Null	-0.60222	0.0509888	Null
89	chr3:96138894-96138967	n-Tn1|chr3_285_tRNAAsn_GTT+	yes	0.324325	6.66	0.591303	4.34	-1.10239	3.7	-0.883298	4.54	0.754406	0.26814	-0.735984	-0.453057	0.246592	0.320722	-0.513528	-0.630901	0.457814	-0.992846	YES	0.511273	-0.59452	YES	0.283657	-0.572214	YES	-1.45066	3.74183847892694e-05	Down	-0.249922	0.481484	Null
90	chr3:96145079-96145150	n-Tq5|chr3_756_tRNAGln_CTG-	yes	1.57568	3.01	0.725666	4.12	1.41805	3.12	1.60308	2.85	0.122823	-0.423611	0.404925	0.541801	0.505106	0.0394882	0.448919	0.363584	1.15067	1.51057	NO	-0.150394	0.473363	YES	0.272297	0.406251	YES	0.359895	0.302585	Null	0.489803	0.124963	Null
91	chr3:96150598-96150669	n-Te19|chr3_286_tRNAGlu_TTC+	yes	0.38506	100	0.0750748	100	-0.568896	100	-0.486157	100	0.0112365	-0.21909	-0.605818	-0.726387	0.116305	-0.180698	-0.662284	-0.666978	0.230067	-0.527526	YES	-0.103927	-0.666102	YES	-0.0321968	-0.664631	YES	-0.757594	0.017003	Null	0.0702588	0.870684	Null
92	chr3:96155090-96155160	n-Tg5|chr3_755_tRNAGly_CCC-	yes	1.48798	100	0.837901	100	0.394261	100	0.97205	100	0.351293	0.134158	-0.000683373	0.146857	0.620528	-0.181085	-0.14098	0.125179	1.16294	0.683155	NO	0.242725	0.073087	YES	0.219722	-0.00790009	YES	-0.479786	0.16143	Null	0.0579833	0.893873	Null
93	chr3:96186834-96186904	n-Tg4|chr3_287_tRNAGly_CCC+	yes	1.27405	100	0.756624	100	0.189766	100	0.829487	100	0.208347	-0.0422742	-0.0626187	-0.0167756	0.360244	-0.242538	-0.428567	0.0103508	1.01534	0.509626	YES	0.0830366	-0.0396972	YES	0.058853	-0.209108	YES	-0.505711	0.135792	Null	0.145227	0.714212	Null
94	chr3:96191328-96191399	n-Te20|chr3_754_tRNAGlu_TTC-	yes	0.339895	100	0.0356336	100	-0.666953	100	-0.62829	100	-0.0235046	-0.459027	-0.75998	-0.791784	0.0736864	-0.25144	-0.696466	-0.755604	0.187765	-0.647622	YES	-0.241266	-0.775882	YES	-0.0888767	-0.726035	YES	-0.835386	0.00885409	Null	0.102542	0.803577	Null
95	chr3:96202982-96203053	n-Tq4|chr3_753_tRNAGln_CTG-	yes	2.97337	0	2.6536	0	2.74642	0	3.46738	0	0.98794	0.873591	1.64403	1.4828	1.56221	1.22756	0.637525	0.864272	2.81348	3.1069	NO	0.930765	1.56342	YES	1.39489	0.750898	NO	0.293416	0.401236	Null	1.27664	5.0183699348865e-06	Up
96	chr3:96206141-96206214	n-Tn10|chr3_289_tRNAAsn_GTT+	yes	1.9879	0	1.7533	0	0.168424	0	0.000886355	0	0.594823	-0.125753	-0.244631	-0.0692729	0.506541	0.520032	-0.598799	-0.424344	1.8706	0.0846554	NO	0.234535	-0.156952	YES	0.513286	-0.511572	YES	-1.78594	1.8676094384374e-06	Down	0.633371	0.0381051	Null
97	chr3:96213992-96214063	n-Th6|chr3_291_tRNAHis_GTG+	yes	2.60444	0	2.43954	0	-0.307036	0	0.47986	0	0.834842	0.518426	-0.794677	-0.603235	1.02103	1.15133	-0.0922375	-0.21787	2.52199	0.0864122	NO	0.676634	-0.698956	YES	1.08618	-0.155054	NO	-2.43558	4.69780414593917e-08	Down	-0.134359	0.734303	Null
98	chr3:96227956-96228026	n-Tg6|chr3_752_tRNAGly_CCC-	yes	1.61058	0	1.13027	0	4.45391	0	4.99141	0	0.560392	0.0300353	2.8019	2.8893	0.433521	0.019638	2.12389	1.9295	1.37043	4.72266	NO	0.295214	2.8456	NO	0.226579	2.0267	NO	3.35223	2.01675907927954e-10	Up	0.750268	0.0110728	Null
99	chr3:96232158-96232230	n-Tk15|chr3_292_tRNALys_CTT+	yes	2.08374	0	1.24037	0	5.93288	0	6.4943	0	0.0649209	0.149052	4.0342	4.10707	0.617891	0.289087	2.79005	2.8129	1.66205	6.21359	NO	0.106987	4.07063	YES	0.453489	2.80148	NO	4.55154	4.38687491395602e-12	Up	1.61566	5.31739746503807e-09	Up
100	chr3:96239895-96239966	n-Th2|chr3_293_tRNAHis_GTG+	yes	0.555447	0	0.560962	0	-0.751107	0	-0.124065	0	-0.194568	0.232863	-0.844399	-0.758914	0.00812751	0.277185	-0.625403	-0.260275	0.558204	-0.437586	YES	0.0191476	-0.801656	YES	0.142656	-0.442839	YES	-0.99579	0.0030347	Down	-0.235309	0.514536	Null
101	chr3:96255348-96255421	n-Tn11|chr3_294_tRNAAsn_GTT+	yes	3.0091	100	2.19081	100	-0.288637	100	-0.312084	100	1.37031	0.452525	-0.8659	-0.562053	1.32905	0.84985	-0.522362	-0.50475	2.59996	-0.30036	NO	0.911415	-0.713976	YES	1.08945	-0.513556	NO	-2.90032	2.558919608918e-09	Down	-0.0223864	0.968255	Null
102	chr3:96256418-96256489	n-Th7|chr3_295_tRNAHis_GTG+	yes	2.71254	100	1.62959	100	-0.295989	100	-0.312972	100	0.836611	0.0661599	-0.626266	-0.578837	1.3528	0.568232	-0.405696	-0.491045	2.17107	-0.30448	NO	0.451386	-0.602551	YES	0.960517	-0.448371	YES	-2.47555	9.39462543428763e-08	Down	0.354951	0.296826	Null
103	chr3:96261993-96262064	n-Th9|chr3_751_tRNAHis_GTG-	yes	2.49622	100	1.53151	100	-0.271805	100	-0.266921	100	0.633172	-0.0485954	-0.624774	-0.581618	1.1516	0.47108	-0.517515	-0.273862	2.01386	-0.269363	NO	0.292288	-0.603196	YES	0.811342	-0.395689	YES	-2.28322	2.11920767510616e-07	Down	0.311546	0.365147	Null
104	chr3:96263061-96263134	n-Tn13|chr3_750_tRNAAsn_GTT-	yes	2.9471	100	2.08464	100	-0.206439	100	-0.306524	100	1.3019	0.397089	-0.857281	-0.605395	1.31736	0.736664	-0.484244	-0.478017	2.51587	-0.256481	NO	0.849495	-0.731338	YES	1.02701	-0.48113	YES	-2.77235	6.83194273660001e-09	Down	-0.0726891	0.865123	Null
105	chr3:96267895-96267966	n-Th11|chr3_749_tRNAHis_GTG-	yes	-0.0224902	0	-0.11449	0	-0.36539	0	-0.0854025	0	-0.106206	0.142715	-0.956342	-0.608765	-0.031219	-0.351943	-0.700959	-0.327734	-0.0684904	-0.225396	YES	0.0182547	-0.782554	YES	-0.191581	-0.514347	YES	-0.156906	0.647776	Null	-0.478043	0.137102	Null
106	chr3:96283314-96283385	n-Tq3|chr3_297_tRNAGln_CTG+	yes	1.80346	0	1.45559	0	1.40791	0	1.92196	0	0.71445	-0.0404326	0.40628	0.613541	0.611626	0.915694	0.0928657	0.354219	1.62952	1.66493	NO	0.337009	0.509911	YES	0.76366	0.223542	YES	0.0354116	0.927791	Null	0.71302	0.0168447	Null
107	chr3:96301704-96301777	n-Tn12|chr3_298_tRNAAsn_GTT+	yes	4.26861	0	4.6187	0	6.64614	0	7.17609	0	2.14643	2.33766	4.77581	4.84167	2.61037	2.79878	3.65163	3.79006	4.44366	6.91112	NO	2.24204	4.80874	NO	2.70458	3.72084	NO	2.46746	2.23365651819921e-08	Up	1.55043	2.08430224194582e-08	Up
108	chr3:96303435-96303507	n-Tk16|chr3_748_tRNALys_CTT-	yes	4.58787	0	4.48989	0	5.68846	0	6.22214	0	2.43658	1.5543	3.94447	3.89005	2.78869	2.38335	2.77257	2.88013	4.53888	5.9553	NO	1.99544	3.91726	NO	2.58602	2.82635	NO	1.41642	6.82262097710681e-05	Up	1.68148	1.30898734162145e-09	Up
109	chr3:96304289-96304360	n-Th8|chr3_747_tRNAHis_GTG-	yes	3.83404	0	3.74255	0	5.57182	0	6.07438	0	1.90391	1.46543	3.54655	3.58645	1.95091	1.82455	2.55973	2.75044	3.78829	5.8231	NO	1.68467	3.5665	NO	1.88773	2.65509	NO	2.0348	3.61296720034354e-07	Up	1.11447	8.16099346072711e-05	Up
110	chr3:96304932-96305003	n-Tg26|chr3_746_tRNAGly_TCC-	yes	5.31651	0	5.62663	0	6.86278	0	7.26893	0	2.68695	2.8172	4.99298	4.98158	3.3155	3.5505	3.71151	3.98421	5.47157	7.06586	NO	2.75208	4.98728	NO	3.433	3.84786	NO	1.59429	1.3518386046705e-05	Up	1.82035	7.45759258437055e-11	Up
111	chr3:96305370-96305441	n-Te13|chr3_745_tRNAGlu_CTC-	yes	4.51741	0	5.34458	0	5.77385	0	6.23357	0	2.05545	2.42552	4.00297	4.18623	2.59035	3.26432	2.82014	3.14157	4.93099	6.00371	NO	2.24049	4.0946	NO	2.92733	2.98085	NO	1.07272	0.00272256	Up	1.8006	1.12464620151448e-10	Up
112	chr3:96962008-96962079	n-Te12|chr3_303_tRNAGlu_CTC+	yes	3.83846	0	3.69071	0	6.02802	0	6.62728	0	1.41982	1.19364	4.06812	4.09249	2.20971	1.85929	2.8347	3.17592	3.76459	6.32765	NO	1.30673	4.0803	NO	2.0345	3.00531	NO	2.56306	1.14139358686401e-08	Up	1.80276	1.07693970507842e-10	Up
113	chr3:97485382-97485453	n-Tq2|chr3_309_tRNAGln_CTG+	yes	1.08185	0	0.8375	0	0.342582	0	0.577458	0	0.027409	0.0917975	-0.39756	-0.228493	0.282067	0.180092	-0.283148	-0.541271	0.959673	0.46002	YES	0.0596032	-0.313027	YES	0.23108	-0.41221	YES	-0.499653	0.113086	Null	0.270659	0.440311	Null
114	chr3:121992390-121992489	B2_Mm1t_B2_SINE-	no	0.638856	10.06	0.365809	12.42	2.22524	10.49	2.98073	7.4	0.332932	0.0806174	1.06363	1.03262	0.539007	0.219955	0.341955	0.531077	0.502333	2.60298	NO	0.206775	1.04812	YES	0.379481	0.436516	YES	2.10065	4.66669838505376e-07	Up	0.784313	0.00759195	Null
115	chr3:121995866-121995950	n-Tr22|chr3_628_tRNAArg_TCT_I-	yes	4.34314	0	4.19531	0	4.7251	0	5.16948	0	2.16087	1.65116	2.69587	2.74325	2.91156	2.48131	1.587	1.89003	4.26922	4.94729	NO	1.90601	2.71956	NO	2.69643	1.73852	NO	0.678062	0.0348906	Null	1.77146	1.9984581351666e-10	Up
116	chr3:123602105-123602176	n-Te1|chr3_622_tRNAGlu_CTC-	yes	-0.025871	0	-0.0712827	0	0.0708799	0	-0.0985335	0	0.087714	0.0101494	0.32537	0.463571	0.109389	0.275607	0.070955	0.106337	-0.0485768	-0.0138268	YES	0.0489317	0.394471	YES	0.192498	0.0886458	YES	0.0347501	0.926537	Null	0.449391	0.166767	Null
117	chr3:146184477-146184576	B1_Mus2_alu_SINE+	no	1.83456	0	1.37399	0	1.29545	0	1.62579	0	0.469665	0.0923797	-0.0259406	-0.116264	0.901997	0.486785	-0.215816	-0.0873137	1.60427	1.46062	NO	0.281022	-0.0711023	YES	0.694391	-0.151565	YES	-0.143653	0.68552	Null	0.493832	0.121598	Null
118	chr4:10801211-10801292	n-Ts9|chr4_16_tRNASer_AGA+	yes	4.60635	0	4.2692	0	5.55224	0	5.94168	0	2.50888	1.83215	3.70648	3.57479	3.02598	2.76377	2.47128	2.76305	4.43777	5.74696	NO	2.17052	3.64063	NO	2.89488	2.61716	NO	1.30919	0.000167322	Up	1.74783	3.26587615461832e-10	Up
119	chr4:11181665-11181764	BC1_Mm_scRNA+	no	0.883573	0.18	1.66273	0.28	2.93071	0.16	3.39847	0.06	-0.49606	0.453167	1.4208	1.30246	0.00755768	0.679348	0.461064	0.45073	1.27315	3.16459	NO	-0.0214466	1.36163	YES	0.343453	0.455897	YES	1.89144	3.33047595244827e-06	Up	1.27063	5.60646612588334e-06	Up
120	chr4:12768277-12768376	L1Md_T_L1_LINE-	no	1.5734	98.67	1.47515	97.73	-0.990798	91.1	-0.887114	98.12	1.69773	0.0228423	0.112541	0.293037	0.157843	0.0448694	-0.000814929	-0.139523	1.52428	-0.938956	NO	0.860287	0.202789		0.101356	-0.070169		-2.46323	9.86656836059553e-09	Down	-0.485973	0.128662	Null
121	chr4:12925518-12925617	L1Md_A_L1_LINE-	no	1.5752	99.31	1.53749	98.99	-1.14651	91.01	-0.726903	82.83	1.71982	0.0385056	0.176626	0.310938	0.0678839	0.0861379	0.0317067	-0.0725823	1.55635	-0.936705	NO	0.879164	0.243782		0.0770109	-0.0204378		-2.49305	1.14282998407092e-08	Down	-0.537933	0.0873496	Null
122	chr4:25503600-25503699	L1Md_A_L1_LINE-	no	1.56044	100	1.71492	100	0.0456459	100	-0.0541136	100	1.64026	0.227221	0.896214	0.756566	0.488993	0.00283675	0.809368	0.633875	1.63768	-0.00423381	NO	0.933738	0.82639		0.245915	0.721622		-1.64191	5.8550806623078e-06	Down	-0.583055	0.0600929	Null
123	chr4:27831926-27831999	n-Ti2|chr4_62_tRNAIle_AAT+	yes	-0.124763	0	0.281053	0	-0.652727	0	-0.493805	0	-0.290592	0.169939	-0.663808	-0.474392	-0.110099	0.311953	-0.866615	-0.573274	0.0781447	-0.573266	YES	-0.0603263	-0.5691	YES	0.100927	-0.719945	YES	-0.651411	0.0417577	Null	0.312098	0.364381	Null
124	chr4:32317225-32317295	n-Tg3|chr4_67_tRNAGly_CCC+	yes	-0.236077	0	-0.160669	0	-0.531924	0	-0.381434	0	-0.382262	-0.29668	-0.550431	-0.227578	-0.270881	-0.413008	-0.559219	-0.543361	-0.198373	-0.456679	YES	-0.339471	-0.389004	YES	-0.341944	-0.55129	YES	-0.258306	0.42489	Null	0.159812	0.682715	Null
125	chr4:40161169-40161268	B2_Mm1t_B2_SINE+	no	0.86622	72.88	0.511539	54.66	2.46294	88.7	3.12961	97.41	0.303661	0.498815	1.27502	1.5642	0.32391	0.150513	0.673468	0.683209	0.68888	2.79627	NO	0.401238	1.41961	YES	0.237212	0.678339	YES	2.10739	3.85441613257727e-07	Up	0.577246	0.0632586	Null
126	chr4:43505660-43505930	Rmrp|RNase_MRP-	yes	4.55655	0.18	4.44818	0.12	5.90074	0.12	6.16065	0.19	2.56506	2.06319	3.81721	3.90762	2.69293	2.48061	2.71613	2.97049	4.50236	6.03069	NO	2.31413	3.86241	NO	2.58677	2.84331	NO	1.52833	1.72888949756691e-05	Up	1.29175	3.78162024316763e-06	Up
127	chr4:82265527-82265598	n-Th10|chr4_1697_tRNAHis_GTG-	yes	-0.0950875	0	0.211588	0	1.84739	0	2.42731	0	-0.345172	-0.140946	0.294907	0.522714	-0.316383	-0.335788	0.290277	0.379441	0.05825	2.13735	NO	-0.243059	0.40881	YES	-0.326085	0.334859	YES	2.0791	3.62665738318767e-07	Up	-0.0090747	0.990271	Null
128	chr4:97438963-97439062	NA_5	no	1.8997	0	2.09628	0	-0.409727	0	0.252388	0	0.640453	0.591439	-0.400863	-0.522274	0.527299	0.775179	-0.224994	-0.0675871	1.99799	-0.0786694	NO	0.615946	-0.461568	YES	0.651239	-0.14629	YES	-2.07666	4.03846518362424e-07	Down	-0.279985	0.424263	Null
129	chr4:117949245-117949344	NA_6	no	1.32539	0	1.40282	0	-0.734083	0	-0.59897	0	0.310698	-0.208546	-0.569857	-0.516412	0.446293	0.26302	-0.966037	-0.262821	1.3641	-0.666527	NO	0.0510764	-0.543134	YES	0.354656	-0.614429	YES	-2.03063	2.22692072428224e-07	Down	0.374874	0.266642	Null
130	chr4:128780080-128780179	B2_Mm1t_B2_SINE+	no	1.39225	21.18	1.44757	12.41	0.839461	9.99	0.744361	35.8	0.501858	0.249754	-0.00220028	0.640678	0.755886	0.660191	0.50991	0.307243	1.41991	0.791911	NO	0.375806	0.319239	YES	0.708039	0.408577	YES	-0.627998	0.0439799	Null	0.242895	0.495184	Null
131	chr4:131681174-131681245	n-Ta22|chr4_626_tRNAAla_CGC+	yes	0.155141	0	-0.325465	0.44	-0.409146	0	-0.645591	0	0.464428	-0.428673	-0.469322	-0.246149	0.286367	-0.209111	-0.830259	-0.767102	-0.0851618	-0.527369	YES	0.0178774	-0.357735	YES	0.0386279	-0.79868	YES	-0.442207	0.172049	Null	0.461696	0.152695	Null
132	chr4:131972358-131972457	B2_Mm1t_B2_SINE+	no	1.91284	0	1.33669	0	0.509681	0	-0.0152772	0	1.09016	0.58374	0.00767659	0.165922	0.96781	0.682445	0.150288	-0.229141	1.62476	0.247202	NO	0.836948	0.0867995	YES	0.825128	-0.0394263	YES	-1.37756	0.000153851	Down	0.114405	0.778515	Null
133	chr4:132071923-132071994	n-Ta8|chr4_645_tRNAAla_AGC+	yes	0.039031	1.32	0.162124	5.33	1.42679	3.55	2.22741	1.06	-0.286408	-0.128974	0.598648	0.248914	0.0568079	0.0499197	0.235075	0.493047	0.100578	1.8271	NO	-0.207691	0.423781	YES	0.0533638	0.364061	YES	1.72652	8.90730594185452e-06	Up	0.320774	0.35004	Null
134	chr4:132670411-132670481	n-Tg9|chr4_1314_tRNAGly_GCC-	yes	-0.0815769	0	0.0561376	0	-0.673769	0	-0.679228	0	0.410769	-0.231772	-0.531182	-1.11398	0.254114	0.110488	-0.975518	-0.378862	-0.0127197	-0.676499	YES	0.0894983	-0.822581	YES	0.182301	-0.67719	YES	-0.663779	0.0337776	Null	-0.052588	0.903704	Null
135	chr4:135478326-135478425	B2_Mm2_B2_SINE+	no	1.19379	0	1.43582	0	0.987878	0	1.44062	0	0.00187928	0.693651	0.919401	0.497927	0.426078	0.571556	0.711623	0.720566	1.3148	1.21425	NO	0.347765	0.708664	YES	0.498817	0.716094	YES	-0.100555	0.782416	Null	0.143622	0.718304	Null
136	chr4:135550206-135550305	B1_Mus1_Alu_SINE+	no	1.90355	0	1.62902	0	-0.975327	0	-0.669274	0	0.0870663	0.047488	-0.675671	-0.758057	0.76757	0.464703	-0.935832	-0.565935	1.76628	-0.822301	NO	0.0672771	-0.716864	YES	0.616137	-0.750884	YES	-2.58858	6.26934540996345e-09	Down	0.582879	0.0600929	Null
137	chr4:138986421-138986492	n-Tv1|chr4_1183_tRNAVal_AAC-	yes	0.341507	0	0.149464	0	-0.178094	0	-0.347009	0	0.0138549	0.109823	-0.725251	-0.229689	-0.340545	-0.0343348	-0.260275	-0.472454	0.245485	-0.262552	YES	0.0618391	-0.47747	YES	-0.18744	-0.366365	YES	-0.508037	0.105065	Null	-0.360385	0.289878	Null
138	chr4:141510536-141510635	B4_B4_SINE-	no	1.52704	0	1.13933	0	-0.0992607	0	0.020578	0	0.265352	-0.173731	-0.537046	-0.107068	0.342852	0.618281	-0.0467514	0.0431562	1.33319	-0.0393413	NO	0.0458107	-0.322057	YES	0.480567	-0.0017976	YES	-1.37253	8.12461313103079e-05	Down	0.114497	0.778515	Null
139	chr4:148800836-148800935	NA_7	no	1.55793	0	1.28164	0	-0.275571	0	-0.706518	0	0.430952	0.145687	-1.32013	-0.307802	0.320976	-0.114129	-0.80232	-0.284132	1.41979	-0.491044	NO	0.288319	-0.813965	YES	0.103423	-0.543226	YES	-1.91083	9.57038745642623e-07	Down	-0.455635	0.159635	Null
140	chr5:5627681-5627751	n-Ts1|chr5_13_tRNASeC_TCA+	yes	0.214745	3.13	-0.0766903	8.38	-0.163188	4.06	-0.335897	8.51	0.316831	0.401771	-0.304023	-0.172283	0.32504	-0.152881	-0.761188	-0.466909	0.0690274	-0.249543	YES	0.359301	-0.238153	YES	0.0860796	-0.614049	YES	-0.31857	0.322719	Null	0.102674	0.803577	Null
141	chr5:30439143-30439242	B2_Mm2_B2_SINE-	no	2.63532	0	2.67465	0	-0.0239336	0	-0.272812	0	0.947488	0.455387	-0.318226	-0.0251295	1.40617	1.37103	0.257954	-0.371583	2.65498	-0.148373	NO	0.701438	-0.171678	YES	1.3886	-0.0568145	NO	-2.80336	1.20482466823266e-09	Down	0.5723	0.0660614	Null
142	chr5:31190456-31190544	n-Ty9|chr5_109_tRNATyr_GTA_I+	yes	4.98376	0	5.01237	0	6.41499	0	6.98594	0	2.70412	2.34007	4.52893	4.54337	3.29218	3.318	3.49298	3.59358	4.99807	6.70047	NO	2.52209	4.53615	NO	3.30509	3.54328	NO	1.7024	6.15011897498748e-06	Up	1.77586	1.82414824343474e-10	Up
143	chr5:31190888-31190960	n-Ta15|chr5_110_tRNAAla_AGC+	yes	5.37129	0	5.78982	0	5.73422	0	6.23384	0	2.9147	2.68134	3.82089	3.86842	3.36051	3.61384	2.82045	3.0476	5.58056	5.98403	NO	2.79802	3.84466	NO	3.48718	2.93403	NO	0.403469	0.223942	Null	1.59979	7.41739446518086e-09	Up
144	chr5:33205445-33205544	B1_Mus2_Alu_SINE-	no	1.77356	0	1.15802	0	0.884085	0	1.17212	0	0.562912	0.25809	0.276401	0.662165	0.775329	0.510059	0.471546	0.0300161	1.46579	1.0281	NO	0.410501	0.469283	YES	0.642694	0.250781	YES	-0.43769	0.187496	Null	0.450695	0.165436	Null
145	chr5:54383776-54383875	B2_Mm2_B2_SINE-	no	1.50146	0	1.21944	0	-0.811221	0	-0.567914	0	0.142405	0.127959	-0.883123	-0.778229	0.594462	0.178368	-0.737533	-0.576974	1.36045	-0.689567	NO	0.135182	-0.830676	YES	0.386415	-0.657253	YES	-2.05002	2.4277750596858e-07	Down	0.0778102	0.852018	Null
146	chr5:65926870-65927025	B2_Mm2_SINE_B2+	yes	2.58072	0	2.32321	0	2.79915	0	3.29371	0	0.921568	0.788459	1.18465	1.38101	1.54408	1.26724	0.349536	0.629519	2.45197	3.04643	NO	0.855013	1.28283	YES	1.40566	0.489528	NO	0.594462	0.0672065	Null	1.34395	1.39603661213168e-06	Up
147	chr5:92781746-92781845	B2_Mm1a_B2_SINE-_and_RLTR13D2_ERVK_LTR-	no	0.611209	5.5	0.640802	5.39	3.92834	2.68	4.50583	3.01	0.18067	-0.156687	2.44288	2.92508	0.180375	0.311375	1.50485	1.49482	0.626006	4.21708	NO	0.0119916	2.68398	YES	0.245875	1.49984	YES	3.59108	5.33730136633132e-11	Up	1.41803	3.22868438608736e-07	Up
148	chr5:93139643-93139742	B2_Mm2_B2_SINE-	no	2.47881	0	2.33436	0	-0.352172	0	-0.434012	0	0.906883	0.549451	-0.658329	-0.266551	1.22145	1.09073	-0.193171	-0.337195	2.40659	-0.393092	NO	0.728167	-0.46244	YES	1.15609	-0.265183	NO	-2.79968	1.13765820372711e-09	Down	0.230669	0.525785	Null
149	chr5:98470109-98470181	n-Tk8|chr5_1627_tRNALys_CTT-	yes	-0.175924	0	0.00680291	0	-0.290258	0	-0.405028	0	-0.470741	-0.441728	-0.54389	-0.676778	-0.295315	-0.336138	-0.521017	-0.457613	-0.0845606	-0.347643	YES	-0.456234	-0.610334	YES	-0.315726	-0.489315	YES	-0.263083	0.416466	Null	0.0194884	0.973933	Null
150	chr5:101421893-101421964	n-Td1|chr5_1609_tRNAAsp_GTC-	yes	-0.651847	0	-0.124294	0	-0.325617	0	-0.35523	0	-0.560852	-0.268911	-0.806776	-0.445273	-0.378917	0.0816316	-0.225855	-0.537481	-0.38807	-0.340424	YES	-0.414881	-0.626025	YES	-0.148643	-0.381668	YES	0.0476466	0.900677	Null	0.0218813	0.968255	Null
151	chr5:108724808-108724907	L1Md_T_L1_LINE-	no	2.1932	99.55	2.07824	99.51	-0.239928	95.57	-0.148596	92.72	2.07001	0.116207	0.00790328	0.0910826	0.287454	0.0997272	0.119333	0.048183	2.13572	-0.194262	NO	1.09311	0.0494929		0.19359	0.0837581		-2.32998	2.47325197589638e-08	Down	-0.933782	0.001148	Down
152	chr5:115002158-115002423	B2_Mm2_SINE_B2-	yes	3.39123	0	3.1584	0	1.54783	0	2.02806	0	1.58284	0.973489	0.539974	0.430164	1.69686	1.50435	0.0585456	0.27397	3.27482	1.78794	NO	1.27817	0.485069	NO	1.60061	0.166258	NO	-1.48687	3.63163611453779e-05	Down	0.641251	0.0351485	Null
153	chr5:125884620-125884691	n-Ta39|chr5_1317_tRNAAla_TGC-	yes	4.83766	0	5.61422	0	6.16287	0	6.57602	0	2.5797	2.54935	4.25003	4.32037	2.9547	3.37021	2.8903	3.20453	5.22594	6.36944	NO	2.56452	4.2852	NO	3.16245	3.04742	NO	1.1435	0.00135075	Up	1.83571	5.29360248429699e-11	Up
154	chr5:125885977-125886048	n-Td15|chr5_1316_tRNAAsp_GTC-	yes	2.9485	0	3.78559	0	4.82929	0	5.35974	0	0.579623	1.41892	2.95197	2.90656	1.20993	2.04707	1.66126	1.74777	3.36704	5.09451	NO	0.999271	2.92926	YES	1.6285	1.70451	NO	1.72747	1.50037538054509e-05	Up	1.85398	3.40581423182664e-11	Up
155	chr5:125886425-125886497	n-Tf7|chr5_1315_tRNAPhe_GAA-	yes	4.92938	0	4.80442	0	6.20366	0	6.48465	0	2.70362	2.41534	4.40416	4.25149	3.30483	3.2682	3.02175	3.31438	4.8669	6.34415	NO	2.55948	4.32783	NO	3.28651	3.16807	NO	1.47725	2.80654937484535e-05	Up	1.88679	1.7148466299972e-11	Up
156	chr5:125889386-125889457	n-Td14|chr5_1314_tRNAAsp_GTC-	yes	5.25199	0	5.37645	0	6.86219	0	7.20424	0	3.02341	2.60956	4.91552	4.88571	3.66332	3.76895	3.78778	3.96559	5.31422	7.03321	NO	2.81649	4.90061	NO	3.71613	3.87669	NO	1.71899	3.77122919336922e-06	Up	1.92358	7.23056737842197e-12	Up
157	chr5:125889842-125889913	n-Ta34|chr5_702_tRNAAla_TGC+	yes	5.1707	0	4.74736	0	5.76413	0	6.16957	0	2.94173	2.10623	4.04166	4.1039	3.27786	2.78964	2.75984	3.04578	4.95903	5.96685	NO	2.52398	4.07278	NO	3.03375	2.90281	NO	1.00782	0.00263662	Up	1.67973	1.34620207728595e-09	Up
158	chr5:134651370-134651469	PB1D7_alu_SINE-	no	-0.484649	0	-0.152664	0	2.54828	0	3.03567	0	-0.396059	-0.0911188	1.28683	1.19274	-0.211014	-0.518536	0.511241	0.884615	-0.318656	2.79198	NO	-0.243589	1.23979	YES	-0.364775	0.697928	YES	3.11063	4.17744156606571e-10	Up	0.420672	0.199426	Null
159	chr5:135372305-135372576	B3_SINE_B2-	yes	1.24098	0	1.73472	0	0.15179	0	0.300053	0	-0.123999	0.349994	-1.03178	-0.834613	0.156167	0.556237	-0.638819	-0.0447668	1.48785	0.225921	NO	0.112997	-0.933197	YES	0.356202	-0.341793	YES	-1.26193	0.000256421	Down	-0.3482	0.306371	Null
160	chr5:137775343-137775442	B1_Mus1_Alu_SINE+	no	1.56529	0	1.87651	0	1.75951	0	2.36243	0	0.328862	0.306942	0.474875	0.743201	0.350911	0.720719	0.123029	-0.00271045	1.7209	2.06097	NO	0.317902	0.609038	YES	0.535815	0.0601595	YES	0.340069	0.313527	Null	0.766791	0.00924096	Null
161	chr5:140252062-140252161	B2_Mus1_Alu_SINE+	no	0.895923	0	0.745111	0	2.61704	0	3.16515	0	-0.109265	-0.063721	1.20607	1.42434	0.0154913	-0.0800533	1.09581	0.998083	0.820517	2.89109	NO	-0.0864931	1.3152	YES	-0.032281	1.04694	YES	2.07058	3.12134283078369e-07	Up	0.322472	0.347708	Null
162	chr5:144108745-144108871	n-Ts11|chr5_1135_tRNASer_AGA_I-	yes	-0.144039	2.43	-0.0452811	4.76	-0.22807	1.88	-0.732938	8.16	-0.302818	0.177896	-0.529065	-0.638849	-0.222266	-0.291993	-0.605852	-0.943806	-0.0946601	-0.480504	YES	-0.0624612	-0.583957	YES	-0.257129	-0.774829	YES	-0.385844	0.235375	Null	-0.00379596	0.992093	Null
163	chr5:150040577-150040650	n-Tn14|chr5_1043_tRNAAsn_GTT-	yes	4.58133	0	5.13435	0	5.35483	0	5.44346	0	2.42347	2.45205	3.85345	3.94186	2.73261	3.2541	2.69937	2.83219	4.85784	5.39914	NO	2.43776	3.89766	NO	2.99336	2.76578	NO	0.541302	0.0954856	Null	1.68747	1.17334208742101e-09	Up
164	chr6:5446594-5446693	NA_8	no	1.29404	0	1.80926	0	-0.585023	0	-0.617733	0	0.358239	-0.0336959	-1.07963	-0.280475	0.321352	0.318911	-0.575693	-0.751024	1.55165	-0.601378	NO	0.162272	-0.680051	YES	0.320132	-0.663358	YES	-2.15302	1.52463803414625e-07	Down	0.141167	0.718304	Null
165	chr6:10050371-10050443	n-Tv13|chr6_10_tRNAVal_CAC+	yes	0.380098	0	-0.38809	0	-0.174855	0	0.0809775	0	0.413745	-0.485081	-0.0397459	-0.0396252	0.319579	-0.405044	0.202581	0.126906	-0.00399562	-0.0469389	YES	-0.0356682	-0.0396856	YES	-0.0427327	0.164744	YES	-0.0429433	0.916109	Null	-0.211494	0.567365	Null
166	chr6:29338824-29338895	n-Tp6|chr6_46_tRNAPro_AGG+	yes	2.85961	0	2.92464	0	4.85212	0	5.37482	0	0.690687	0.812028	3.0571	3.06889	1.37416	1.47421	1.94883	2.1186	2.89212	5.11347	NO	0.751357	3.063	YES	1.42419	2.03372	NO	2.22134	9.61963746750796e-08	Up	1.70211	8.70612274822068e-10	Up
167	chr6:30297452-30297551	Rn5S|5S_rRNA-	no	0.437675	0	0.0295482	0	3.06638	0	3.42663	0	0.178523	-0.0238617	1.81553	1.8585	-0.129058	-0.0957624	0.877351	1.2447	0.233611	3.24651	NO	0.0773309	1.83702	NO	-0.11241	1.06103	YES	3.0129	6.59317584961878e-10	Up	0.586248	0.0588872	Null
168	chr6:35127220-35127319	B1_Mm_Alu_SINE-	no	0.347723	0	0.193558	0	2.13901	0	2.70295	0	0.0155089	-0.133175	0.497034	0.883725	-0.0734532	0.132135	0.230582	0.332486	0.27064	2.42098	NO	-0.0588328	0.690379	YES	0.029341	0.281534	YES	2.15034	1.79582917010153e-07	Up	0.497019	0.118724	Null
169	chr6:38287916-38288126	B2_Mm2_SINE_B2-	yes	2.71464	0	3.07733	0	-0.455762	0	0.23202	0	0.850872	1.26716	-0.412543	-0.478409	1.42834	1.66066	-0.268891	-0.222093	2.89598	-0.111871	NO	1.05902	-0.445476	YES	1.5445	-0.245492	NO	-3.00785	1.20482466823266e-09	Down	0.285499	0.414284	Null
170	chr6:38483931-38484003	n-Tr10|chr6_107_tRNAArg_CCT+	yes	4.65159	0	4.94947	0	5.73601	0	6.31535	0	2.05545	2.10709	3.90799	3.97929	2.58175	2.80964	2.85555	3.00018	4.80053	6.02568	NO	2.08127	3.94364	NO	2.69569	2.92786	NO	1.22516	0.000440503	Up	1.6302	3.87925265083242e-09	Up
171	chr6:47600760-47600854	Rn4.5s|4.5SRNA_scRNA-	no	3.55185	0	3.24509	0	4.3278	0	4.70431	0	1.25572	0.410383	2.2695	2.40788	1.01427	0.881705	1.34114	1.59228	3.39847	4.51605	NO	0.83305	2.33869	YES	0.947987	1.46671	YES	1.21521	0.000400508	Up	0.988919	0.000322641	Up
172	chr6:47604999-47605093	Rn4.5s|4.5SRNA_scRNA-	no	5.12199	100	5.14579	100	4.37614	100	4.43488	100	2.49011	2.00322	3.25389	3.60915	3.37649	3.31523	2.33154	2.6884	5.13389	4.40551	NO	2.24666	3.43152	NO	3.34586	2.50997	NO	-0.731293	0.0370835	Null	2.02193	4.82171741284251e-13	Up
173	chr6:47609320-47609414	Rn4.5s|4.5SRNA_scRNA-	no	5.28308	98.84	5.30916	98.75	4.47095	99.59	4.46447	99.26	2.65591	2.18192	3.51815	3.8738	3.57687	3.50607	2.547	2.90054	5.29612	4.46771	NO	2.41892	3.69598	NO	3.54147	2.72377	NO	-0.853538	0.0142321	Null	2.09602	1.29904611102246e-13	Up
174	chr6:47613660-47613754	Rn4.5s|4.5SRNA_scRNA-	no	5.12364	100	5.15086	100	4.38345	100	4.44224	100	2.48852	2.01203	3.26159	3.61646	3.37771	3.31998	2.33883	2.69621	5.13725	4.41285	NO	2.25027	3.43902	NO	3.34884	2.51752	NO	-0.734498	0.0364739	Null	2.02125	4.82171741284251e-13	Up
175	chr6:47617996-47618090	Rn4.5s|4.5SRNA_scRNA-	no	5.11755	100	5.12611	100	4.37614	100	4.43488	100	2.48567	1.98354	3.25389	3.60915	3.37205	3.29555	2.33154	2.6884	5.12183	4.40551	NO	2.2346	3.43152	NO	3.3338	2.50997	NO	-0.731293	0.0370835	Null	2.02193	4.82171741284251e-13	Up
176	chr6:47622304-47622398	Rn4.5s|4.5SRNA_scRNA-	no	5.1192	100	5.13111	100	4.38345	100	4.44224	100	2.48407	1.99228	3.26159	3.61646	3.37327	3.30023	2.33883	2.69621	5.12515	4.41285	NO	2.23817	3.43902	NO	3.33675	2.51752	NO	-0.734498	0.0364739	Null	2.02125	4.82171741284251e-13	Up
177	chr6:47626642-47626736	Rn4.5s|4.5SRNA_scRNA-	no	5.1192	100	5.13111	100	4.38345	100	4.44224	100	2.48407	1.99228	3.26159	3.61646	3.37327	3.30023	2.33883	2.69621	5.12515	4.41285	NO	2.23817	3.43902	NO	3.33675	2.51752	NO	-0.734498	0.0364739	Null	2.02125	4.82171741284251e-13	Up
178	chr6:47630963-47631057	Rn4.5s|4.5SRNA_scRNA-	no	5.12199	100	5.14579	100	4.37614	100	4.43488	100	2.49011	2.00322	3.25389	3.60915	3.37649	3.31523	2.33154	2.6884	5.13389	4.40551	NO	2.24666	3.43152	NO	3.34586	2.50997	NO	-0.731293	0.0370835	Null	2.02193	4.82171741284251e-13	Up
179	chr6:47635281-47635375	Rn4.5s|4.5SRNA_scRNA-	no	5.12199	100	5.14579	100	4.37614	100	4.43488	100	2.49011	2.00322	3.25389	3.60915	3.37649	3.31523	2.33154	2.6884	5.13389	4.40551	NO	2.24666	3.43152	NO	3.34586	2.50997	NO	-0.731293	0.0370835	Null	2.02193	4.82171741284251e-13	Up
180	chr6:47689877-47689970	Rn4.5s|4.5SRNA_scRNA-	no	4.51872	67.78	4.65011	67.91	4.45125	65.71	4.50345	67.33	2.18388	1.81254	3.2689	3.64303	2.66264	2.77469	2.42827	2.84866	4.58442	4.47735	NO	1.99821	3.45597	NO	2.71866	2.63846	NO	-0.0725792	0.853797	Null	1.53888	1.45258639582095e-08	Up
181	chr6:47694136-47694230	Rn4.5s|4.5SRNA_scRNA-	no	4.89534	91.9	4.86667	91.24	4.24002	77.81	4.31489	75.35	2.48376	1.89882	3.46362	3.83311	3.21146	3.21167	2.64393	3.06273	4.881	4.27746	NO	2.19129	3.64836	NO	3.21156	2.85333	NO	-0.601314	0.0901925	Null	1.81622	4.38667874571893e-11	Up
182	chr6:47698496-47698590	Rn4.5s|4.5SRNA_scRNA-	no	4.70348	54.48	4.82396	54.61	4.21381	62.8	4.30789	62.99	2.25031	1.97812	3.44345	3.74455	3.02183	3.20677	2.70549	3.11892	4.76372	4.26085	NO	2.11421	3.594	NO	3.1143	2.91221	NO	-0.475154	0.186137	Null	1.68263	6.97943681727287e-10	Up
183	chr6:47702830-47702924	Rn4.5s|4.5SRNA_scRNA-	no	4.74413	100	4.81176	100	4.13647	100	4.16421	100	2.26557	1.82201	3.28422	3.65793	2.9914	3.10557	2.48523	2.89158	4.77794	4.15034	NO	2.04379	3.47107	NO	3.04848	2.6884	NO	-0.633998	0.0731141	Null	1.78822	7.72401689909448e-11	Up
184	chr6:47707793-47707892	NA_9	no	2.42521	79.9	2.831	80.6	3.3153	84.44	3.50449	75.53	0.944491	0.664222	2.15608	2.54939	1.11115	1.21823	1.19274	1.69811	2.6281	3.40989	NO	0.804357	2.35274		1.16469	1.44543		0.78179	0.0151723	Null	1.26764	5.9117800652807e-06	Up
185	chr6:47713262-47713356	Rn4.5s|4.5SRNA_scRNA-	no	4.74413	100	4.81176	100	4.13647	100	4.16421	100	2.26557	1.82201	3.28422	3.65793	2.9914	3.10557	2.48523	2.89158	4.77794	4.15034	NO	2.04379	3.47107	NO	3.04848	2.6884	NO	-0.633998	0.0731141	Null	1.78822	7.72401689909448e-11	Up
186	chr6:47717702-47717801	NA_10	no	1.98863	99.06	2.1025	97.63	2.6175	97.51	2.72093	96.8	0.700298	0.236911	1.35393	1.61425	0.818383	0.854351	0.594584	1.0386	2.04556	2.66921	NO	0.468605	1.48409		0.836367	0.816593		0.623647	0.0455312	Null	1.03526	0.000270038	Up
187	chr6:47722109-47722208	NA_11	no	1.90405	96.44	2.02495	95.27	2.54406	95.5	2.66471	93.56	0.57547	0.161322	1.28203	1.53019	0.765806	0.733131	0.52122	0.958892	1.9645	2.60438	NO	0.368396	1.40611		0.749469	0.740056		0.639884	0.0409251	Null	1.04713	0.000225587	Up
188	chr6:47731623-47731724	Rny3|Y3_RNA+	yes	3.73648	0	4.28031	0	6.8149	0	7.50042	0	2.11766	2.30909	4.93785	4.90972	2.20417	2.78603	3.66785	3.78073	4.0084	7.15766	NO	2.21337	4.92378	NO	2.4951	3.72429	NO	3.14926	8.25723208953585e-10	Up	1.48122	8.84544554761244e-08	Up
189	chr6:47738068-47738179	Rny1|Y1_RNA-	yes	3.34219	0	2.99457	0	6.02802	0	6.59412	0	1.66649	1.34059	4.37041	4.28819	1.90332	1.45532	2.77952	3.08756	3.16838	6.31107	NO	1.50354	4.3293	NO	1.67932	2.93354	NO	3.14269	4.20055997941708e-10	Up	1.57154	1.37753303214238e-08	Up
190	chr6:47928996-47929067	n-Tc57|chr6_157_tRNACys_GCA+	yes	4.89657	0	5.0073	0	5.65677	0	6.29087	0	2.88379	2.39873	3.80549	3.92728	3.41724	3.32284	2.67798	2.857	4.95194	5.97382	NO	2.64126	3.86638	NO	3.37004	2.76749	NO	1.02188	0.00253807	Up	1.82767	6.35434228506158e-11	Up
191	chr6:48083936-48084007	n-Tc37|chr6_161_tRNACys_GCA+	yes	-0.236654	1.49	-0.125896	0	0.688209	0	1.17133	4	-0.298363	-0.111422	0.227529	0.980316	-0.302823	0.0197584	0.47003	0.549946	-0.181275	0.92977	YES	-0.204892	0.603923	YES	-0.141532	0.509988	YES	1.11104	0.000943839	Up	0.157295	0.686375	Null
192	chr6:48089509-48089580	n-Tc10|chr6_1034_tRNACys_GCA-	yes	0.218017	0	0.232319	0	0.133754	0	0.206651	0	0.214172	0.228627	0.438242	0.501672	0.238891	0.0640856	0.101674	0.0337459	0.225168	0.170202	YES	0.221399	0.469957	YES	0.151488	0.0677101	YES	-0.0549662	0.885249	Null	0.332336	0.33214	Null
193	chr6:48090483-48090554	n-Tc4|chr6_1033_tRNACys_GCA-	yes	-0.377762	0	-0.475035	0	-0.0569726	0	0.351856	0	-0.416312	-0.373192	0.279365	0.217574	-0.367308	-0.326951	0.202488	0.640811	-0.426398	0.147442	YES	-0.394752	0.24847	YES	-0.34713	0.42165	YES	0.57384	0.0715842	Null	-0.125557	0.75566	Null
194	chr6:48093355-48093426	n-Tc13|chr6_162_tRNACys_GCA+	yes	-0.40515	26.08	0.148955	25.77	0.124783	8.33	0.627323	8.63	-0.125857	0.0326849	-0.376143	-0.475143	-0.530874	-0.234215	-0.321544	-0.0942342	-0.128097	0.376053	YES	-0.0465861	-0.425643	YES	-0.382545	-0.207889	YES	0.504151	0.131677	Null	-0.553712	0.0769609	Null
195	chr6:48094927-48094998	n-Tc36|chr6_1032_tRNACys_GCA-	yes	-0.55572	50.81	-0.353993	35.45	-0.00922693	50.54	0.21267	58.7	-0.0279121	-0.17788	-0.434066	-0.384313	-0.211905	-0.632473	-0.229508	-0.393997	-0.454856	0.101721	YES	-0.102896	-0.409189	YES	-0.422189	-0.311752	YES	0.556578	0.077334	Null	-0.41673	0.203856	Null
196	chr6:48104713-48104784	n-Tc38|chr6_163_tRNACys_GCA+	yes	-0.118815	46.69	-0.491849	39.11	1.44329	37.05	1.70371	27.3	-0.378445	-0.527716	0.501115	0.587649	-0.225392	-0.28181	0.400443	0.485426	-0.305332	1.5735	YES	-0.45308	0.544382	YES	-0.253601	0.442935	YES	1.87883	1.12015306828749e-06	Up	0.300926	0.384529	Null
197	chr6:48106274-48106345	n-Tc35|chr6_1031_tRNACys_GCA-	yes	0.182187	31.95	0.182757	31.01	-0.315601	57.82	-0.0330865	63.47	0.390137	0.368188	-0.413588	-0.195524	0.0751637	0.0512433	-0.421486	-0.373117	0.182472	-0.174344	YES	0.379162	-0.304556	YES	0.0632035	-0.397302	YES	-0.356816	0.261981	Null	-0.223213	0.541887	Null
198	chr6:48110178-48110249	n-Tc39|chr6_164_tRNACys_GCA+	yes	-0.164442	48.77	-0.262485	35.46	1.42134	38.2	1.24537	39.25	-0.613603	-0.416411	0.222985	0.0892401	-0.209266	0.111663	0.395903	0.425035	-0.213464	1.33335	YES	-0.515007	0.156112	YES	-0.0488013	0.410469	YES	1.54682	1.3518386046705e-05	Up	0.211849	0.567018	Null
199	chr6:48114100-48114171	n-Tc40|chr6_166_tRNACys_GCA+	yes	-0.0667945	3.33	0.0715173	16.47	1.84776	4.7	2.63046	7.22	0.14559	0.114469	1.04231	0.885504	-0.0263964	0.0735721	1.00226	0.582532	0.00236143	2.23911	NO	0.130029	0.963907	YES	0.0235879	0.792397	YES	2.23675	1.73071890111143e-07	Up	0.0650691	0.878387	Null
200	chr6:48136317-48136388	n-Tc8|chr6_167_tRNACys_GCA+	yes	-0.121436	0	-0.38024	0	0.804885	0	1.13595	0	-0.161845	-0.457964	1.06133	0.489449	-0.0904347	-0.573427	1.07062	0.957041	-0.250838	0.97042	YES	-0.309905	0.775388	YES	-0.331931	1.01383	YES	1.22126	0.000321485	Up	-0.260466	0.461666	Null
201	chr6:48147025-48147096	n-Tc41|chr6_168_tRNACys_GCA+	yes	-0.0826116	0	-0.362803	0	-0.547349	0	-0.474483	0	-0.20606	-0.60028	-0.456104	-0.710204	-0.23805	-0.389055	-0.782422	-0.485505	-0.222707	-0.510916	YES	-0.40317	-0.583154	YES	-0.313552	-0.633963	YES	-0.288209	0.37386	Null	0.140427	0.718304	Null
202	chr6:48155067-48155138	n-Tc1|chr6_170_tRNACys_GCA+	yes	0.454923	0	0.181203	0	-0.320823	0	0.175348	0	0.521291	0.0915387	0.509686	0.557565	0.599961	-0.0214746	0.722788	-0.00498226	0.318063	-0.0727378	YES	0.306415	0.533626	YES	0.289243	0.358903	YES	-0.390801	0.232642	Null	0.157551	0.686375	Null
203	chr6:48157450-48157521	n-Tc34|chr6_1030_tRNACys_GCA-	yes	-0.183511	0	0.161987	0	0.8068	0	0.728851	0	0.189587	0.180029	0.0685557	0.331223	-0.027702	0.252114	0.513834	0.168931	-0.010762	0.767826	YES	0.184808	0.199889	YES	0.112206	0.341382	YES	0.778587	0.0146245	Null	-0.214095	0.561996	Null
204	chr6:48159837-48159908	n-Tc49|chr6_1029_tRNACys_GCA-	yes	0.0166049	0	0.0280373	0	0.0527678	0	0.661228	0	-0.38089	-0.788991	-0.669641	-0.660325	-0.148765	-0.144148	-0.523711	-0.418543	0.0223211	0.356998	YES	-0.58494	-0.664983	YES	-0.146457	-0.471127	YES	0.334677	0.315483	Null	0.244627	0.491514	Null
205	chr6:48173093-48173164	n-Tc33|chr6_1027_tRNACys_GCA-	yes	-0.307397	0	0.123089	0	0.833239	0	0.729716	0	-0.335535	0.0180311	0.199566	0.0318549	-0.146558	0.196529	0.294423	-0.0250166	-0.092154	0.781478	YES	-0.158752	0.115711	YES	0.0249852	0.134703	YES	0.873632	0.00706956	Null	0.164744	0.671767	Null
206	chr6:48174328-48174399	n-Tc48|chr6_1026_tRNACys_GCA-	yes	0.311529	0	-0.462874	0	0.164651	0	0.327526	0	0.274783	-0.502296	-0.458314	-0.208304	0.16176	-0.101225	-0.302445	-0.711421	-0.0756724	0.246088	YES	-0.113756	-0.333309	YES	0.0302672	-0.506933	YES	0.321761	0.352695	Null	0.317648	0.354631	Null
207	chr6:48194315-48194386	n-Tc32|chr6_1025_tRNACys_GCA-	yes	-0.150755	2.12	-0.170426	1.88	1.26416	2.67	1.8336	1.23	-0.240798	-0.0644339	0.68655	0.612005	0.0232226	-0.224444	0.327726	0.40724	-0.16059	1.54888	YES	-0.152616	0.649278	YES	-0.100611	0.367483	YES	1.70947	5.79643599404232e-06	Up	0.3338	0.329902	Null
208	chr6:48202102-48202173	n-Tc31|chr6_1024_tRNACys_GCA-	yes	-0.255792	0	0.426025	0	-0.295989	0	-0.885517	0	0.0316384	0.413362	-0.478828	-0.0926906	-0.163866	-0.0334515	-0.281557	-0.12415	0.0851161	-0.590753	YES	0.2225	-0.28576	YES	-0.0986587	-0.202853	YES	-0.675869	0.0500671	Null	-0.404065	0.221155	Null
209	chr6:48203079-48203150	n-Tc15|chr6_1023_tRNACys_GCA-	yes	0.0130439	12.21	-0.150115	12.35	-0.793702	12.97	-0.798287	6.2	0.11174	0.0103041	-1.15711	-1.04899	-0.0411528	-0.0589065	-1.08096	-1.09809	-0.0685354	-0.795994	YES	0.0610219	-1.10305	YES	-0.0500297	-1.08953	YES	-0.727459	0.0202606	Null	-0.124577	0.757174	Null
210	chr6:48211721-48211792	n-Tc30|chr6_1022_tRNACys_GCA-	yes	0.205966	0	-0.0987064	0	-0.108158	0	0.44805	0	0.559134	-0.221712	0.226157	0.0386922	0.441162	-0.483791	-0.313141	-0.0423984	0.0536296	0.169946	YES	0.168711	0.132424	YES	-0.0213145	-0.17777	YES	0.116316	0.750852	Null	0.120169	0.76733	Null
211	chr6:48218457-48218528	n-Tc29|chr6_1021_tRNACys_GCA-	yes	-0.12162	18.75	0.273602	12.78	0.0332094	35.48	0.708609	13.88	-0.29121	0.478696	-0.124889	-0.0278223	-0.358711	0.157629	0.107721	0.244167	0.0759907	0.370909	YES	0.0937428	-0.0763555	YES	-0.100541	0.175944	YES	0.294919	0.397907	Null	-0.446584	0.169991	Null
212	chr6:48221925-48221996	n-Tc42|chr6_171_tRNACys_GCA+	yes	0.198661	36.32	-0.128721	31.01	-0.248407	51.61	0.27211	33.18	0.305576	-0.100979	-0.152469	-0.0799725	0.343547	-0.0125703	-0.681629	-0.258733	0.0349697	0.0118514	YES	0.102298	-0.116221	YES	0.165488	-0.470181	YES	-0.0231184	0.956315	Null	0.41715	0.203801	Null
213	chr6:48223679-48223750	n-Tc43|chr6_172_tRNACys_GCA+	yes	-0.419205	68.75	-0.270802	40.29	-0.489058	34.11	-0.184849	47.61	0.23741	0.19397	-0.44698	-0.363626	-0.00228708	-0.198591	-0.206787	-0.13076	-0.345004	-0.336953	YES	0.21569	-0.405303	YES	-0.100439	-0.168773	YES	0.00805012	0.984961	Null	-0.552659	0.0774101	Null
214	chr6:48228791-48228862	n-Tc3|chr6_1020_tRNACys_GCA-	yes	-0.179938	0	-0.0749738	0	0.599269	0	0.604152	0	-0.585549	-0.0865115	0.528818	0.436081	-0.166716	-0.15767	0.470823	0.348864	-0.127456	0.601711	YES	-0.33603	0.48245	YES	-0.162193	0.409844	YES	0.729166	0.0197864	Null	0.246443	0.488153	Null
215	chr6:48229770-48229841	n-Tc28|chr6_1019_tRNACys_GCA-	yes	-0.12222	8.73	-0.332393	8.16	-0.117531	18.72	0.14636	16.29	0.0694818	-0.634007	-0.292189	-0.315989	-0.00842966	-0.612388	-0.462683	-0.372623	-0.227306	0.0144148	YES	-0.282263	-0.304089	YES	-0.310409	-0.417653	YES	0.241721	0.461215	Null	0.0854183	0.834306	Null
216	chr6:48238875-48238946	n-Tc12|chr6_1018_tRNACys_GCA-	yes	0.0239413	0	-0.0828636	0	0.149693	0	0.569315	0	0.471403	0.238988	0.678544	0.446615	0.233565	0.125975	0.48525	0.423239	-0.0294612	0.359504	YES	0.355196	0.562579	YES	0.17977	0.454244	YES	0.388965	0.225864	Null	-0.0670908	0.875302	Null
217	chr6:48243006-48243077	n-Tc50|chr6_1017_tRNACys_GCA-	yes	-0.36193	0	-0.314211	0	0.556435	0	0.716099	0	-0.314183	-0.197433	-0.0378304	0.607429	-0.313859	-0.163666	0.100458	0.530579	-0.33807	0.636267	YES	-0.255808	0.284799	YES	-0.238763	0.315518	YES	0.974338	0.0024444	Up	-0.0136742	0.985457	Null
218	chr6:48247432-48247503	n-Tc44|chr6_173_tRNACys_GCA+	yes	-0.182663	8.69	-0.111131	8.6	-0.76712	19.04	-0.149258	18.84	-0.361102	-0.152899	-0.433036	-0.455845	-0.340502	-0.363618	0.118001	-0.138968	-0.146897	-0.458189	YES	-0.257001	-0.444441	YES	-0.35206	-0.0104835	YES	-0.311292	0.354152	Null	-0.529016	0.0935148	Null
219	chr6:48248949-48249020	n-Tc27|chr6_1016_tRNACys_GCA-	yes	-0.176837	32.43	-0.378048	33.64	-0.303599	21.1	-0.0328878	28.94	-0.00627241	-0.749095	-0.798151	-0.676607	-0.0582749	-0.818851	-0.408125	-0.154116	-0.277442	-0.168243	YES	-0.377684	-0.737379	YES	-0.438563	-0.28112	YES	0.109199	0.757499	Null	-0.517138	0.101892	Null
220	chr6:48252458-48252529	n-Tc6|chr6_174_tRNACys_GCA+	yes	0.188608	6.06	-0.275594	4.34	-0.470258	1.66	-0.778293	10.11	0.364273	0.0745952	-1.28927	-0.603235	0.278536	-0.105573	-0.790201	-0.969496	-0.0434928	-0.624275	YES	0.219434	-0.946254	YES	0.0864817	-0.879848	YES	-0.580782	0.0732277	Null	-0.199358	0.590869	Null
221	chr6:48253464-48253535	n-Tc17|chr6_175_tRNACys_GCA+	yes	-0.37229	52.17	0.00860406	28.3	0.133754	38.7	0.0417838	5.26	-0.168532	-0.0868657	0.130632	0.441211	-0.252086	0.154505	0.148324	-0.13153	-0.181843	0.0877687	YES	-0.127699	0.285921	YES	-0.0487906	0.00839689	YES	0.269612	0.412598	Null	0.356433	0.295117	Null
222	chr6:48255463-48255534	n-Tc7|chr6_1015_tRNACys_GCA-	yes	-0.201599	6.89	0.0102976	1.33	-1.28157	7.31	-0.893845	3.89	0.00187928	-0.0462266	-0.536566	-0.685814	0.11212	0.164999	-0.958003	-0.586705	-0.0956506	-1.08771	YES	-0.0221737	-0.61119	YES	0.138559	-0.772354	YES	-0.992057	0.00255364	Down	0.321896	0.347994	Null
223	chr6:48258728-48258799	n-Tc16|chr6_1014_tRNACys_GCA-	yes	-0.379727	14.92	0.133463	17.39	-0.277962	9.39	-0.247869	22.22	-0.158282	-0.242419	-0.731774	-0.529943	-0.111007	0.155655	-0.425683	-0.67447	-0.123132	-0.262915	YES	-0.200351	-0.630858	YES	0.0223239	-0.550077	YES	-0.139783	0.69276	Null	0.141893	0.718304	Null
224	chr6:48259706-48259777	n-Tc26|chr6_1013_tRNACys_GCA-	yes	-0.55082	5.66	-0.0899381	14.71	0.406928	17.99	0.417319	41.69	-0.436517	-0.564537	0.759273	0.299903	-0.543078	-0.0216689	0.503193	-0.0742498	-0.320379	0.412124	YES	-0.500527	0.529588	YES	-0.282373	0.214472	YES	0.732503	0.0224287	Null	0.53327	0.0903038	Null
225	chr6:48261498-48261569	n-Tc9|chr6_176_tRNACys_GCA+	yes	-0.476935	6.25	0.140866	3.22	-0.313948	4.16	-0.466979	11.9	0.0735333	-0.105544	-0.240837	-0.49463	-0.1368	0.0334033	-0.305545	-0.375731	-0.168035	-0.390463	YES	-0.0160055	-0.367734	YES	-0.0516983	-0.340638	YES	-0.222429	0.519992	Null	-0.0627888	0.882992	Null
226	chr6:48263017-48263088	n-Tc25|chr6_1012_tRNACys_GCA-	yes	-1.07582	17.24	-0.297243	17.33	0.379704	12.59	0.287898	11.62	-0.57644	-0.257025	-0.0167015	0.121953	-0.658026	-0.0444681	0.337283	0.231691	-0.686531	0.333801	YES	-0.416733	0.0526257	YES	-0.351247	0.284487	YES	1.02033	0.00311314	Up	-0.166376	0.667379	Null
227	chr6:48266536-48266605	n-Tc2|chr6_177_tRNACys_GCA+	yes	-0.562354	19.04	-0.132497	15.29	-0.578402	7.69	-0.498584	26.31	0.260603	0.00391309	-0.603368	-0.197913	0.148505	-0.0575199	-0.0769784	-0.533196	-0.347425	-0.538493	YES	0.132258	-0.40064	YES	0.0454927	-0.305087	YES	-0.191068	0.577857	Null	-0.182318	0.63048	Null
228	chr6:48267514-48267585	n-Tc45|chr6_178_tRNACys_GCA+	yes	0.0948735	33.33	-0.0592475	25	0.0568681	32.43	-0.054706	1.49	-0.247091	-0.21757	-0.586384	0.257233	0.0413911	-0.0992439	0.139585	-0.123585	0.017813	0.00108105	YES	-0.23233	-0.164575	YES	-0.0289264	0.0080001	YES	-0.016732	0.965093	Null	0.0308288	0.957539	Null
229	chr6:48282839-48282910	n-Tc24|chr6_1011_tRNACys_GCA-	yes	-0.513665	3.03	0.211556	6.38	0.640602	6.79	0.866987	11.59	-0.808628	0.318589	0.424558	0.313809	-0.92944	0.415092	0.393224	-0.0320575	-0.151055	0.753794	YES	-0.245019	0.369184	YES	-0.257174	0.180583	YES	0.904849	0.00779771	Null	0.176446	0.641917	Null
230	chr6:48286107-48286178	n-Tc23|chr6_1010_tRNACys_GCA-	yes	-0.35448	12.9	-0.0612503	26.31	0.474392	19.19	0.770607	23.07	-0.335503	-0.184574	0.314642	0.493475	-0.300323	-0.223959	-0.0112812	0.118671	-0.207865	0.622499	YES	-0.260038	0.404058	YES	-0.262141	0.0536952	YES	0.830364	0.00991133	Null	0.34826	0.306371	Null
231	chr6:48287090-48287161	n-Tc22|chr6_1009_tRNACys_GCA-	yes	-0.166163	24.7	0.135862	23.13	-0.408765	31.85	-0.656051	12.5	-0.502777	-0.370558	-0.723639	-0.52915	-0.0408232	-0.0581068	-0.515144	-0.552045	-0.0151505	-0.532408	YES	-0.436668	-0.626395	YES	-0.049465	-0.533595	YES	-0.517257	0.103146	Null	0.294403	0.395618	Null
232	chr6:48290612-48290683	n-Tc14|chr6_179_tRNACys_GCA+	yes	-0.0431379	16.07	0.208519	10.9	-0.245023	17.37	-0.243708	12.14	-0.248053	0.167289	-0.745379	-0.177436	-0.353054	0.146671	-0.387087	-0.326419	0.0826907	-0.244366	YES	-0.0403823	-0.461407	YES	-0.103191	-0.356753	YES	-0.327056	0.306392	Null	-0.167463	0.665504	Null
233	chr6:48291587-48291658	n-Tc5|chr6_180_tRNACys_GCA+	yes	0.0178466	5.35	0.32757	2.92	0.246451	0.98	0.398515	4.38	0.295587	0.25509	-0.072874	0.153493	-0.0775765	0.513718	0.449969	0.299419	0.172708	0.322483	YES	0.275339	0.0403096	YES	0.218071	0.374694	YES	0.149774	0.664855	Null	-0.391652	0.237879	Null
234	chr6:48299761-48299832	n-Tc21|chr6_1008_tRNACys_GCA-	yes	-0.557397	17.07	0.165718	8.86	-0.262379	14.28	0.187778	15.2	-0.310664	0.123712	0.0301252	0.0282928	-0.324779	0.271137	-0.164016	-0.16871	-0.19584	-0.0373006	YES	-0.0934762	0.029209	YES	-0.0268211	-0.166363	YES	0.158539	0.671963	Null	0.262227	0.457568	Null
235	chr6:48304018-48304089	n-Tc20|chr6_1006_tRNACys_GCA-	yes	-0.126441	10.34	-0.10554	19.87	-0.0156967	25.26	0.0348797	25.23	0.375546	-0.393064	0.0306316	-0.202665	-0.155051	0.0632395	0.268312	0.00452512	-0.115991	0.00959151	YES	-0.00875881	-0.0860169	YES	-0.045906	0.136419	YES	0.125582	0.714458	Null	-0.259583	0.462805	Null
236	chr6:48305854-48305925	n-Tc46|chr6_181_tRNACys_GCA+	yes	0.0599771	19.6	-0.0495171	20.79	-0.0779056	19.31	-0.176106	18.23	0.0922952	-0.144741	-0.303736	0.109561	0.0729109	-0.253957	0.0294242	-0.844917	0.00523	-0.127006	YES	-0.0262229	-0.0970874	YES	-0.0905228	-0.407746	YES	-0.132236	0.699372	Null	0.246359	0.488153	Null
237	chr6:48306850-48306921	n-Tc11|chr6_182_tRNACys_GCA+	yes	0.577129	0	0.285153	0	0.530346	0	0.208151	0	-0.253621	0.286895	1.02543	0.309105	0.268649	-0.00695452	0.528524	1.138	0.431141	0.369248	YES	0.016637	0.667267	YES	0.130847	0.833262	YES	-0.0618929	0.875034	Null	-0.0517845	0.905015	Null
238	chr6:48313531-48313602	n-Tc19|chr6_1005_tRNACys_GCA-	yes	-0.368676	48.78	-0.247519	54.66	-0.465175	72.41	-0.0297222	81.13	-0.675832	0.0578739	-0.123944	-0.52269	-0.548962	-0.366269	-0.314931	-0.207547	-0.308098	-0.247448	YES	-0.308979	-0.323317	YES	-0.457615	-0.261239	YES	0.0606492	0.876591	Null	-0.210713	0.56898	Null
239	chr6:69318898-69318997	L1Md_T_L1_LINE-	no	2.06473	34.62	1.98209	33.05	-1.35331	46.21	-1.16731	51.68	2.21621	-0.0230893	0.112252	0.254752	0.183547	0.0157895	0.0310371	-0.210229	2.02341	-1.26031	NO	1.09656	0.183502		0.0996684	-0.0895958		-3.28372	1.16034285981153e-10	Down	-0.723793	0.0149004	Null
240	chr6:69466417-69466516	NA_12	no	2.8569	93.9	3.27009	94.48	4.78392	97.06	5.25858	97.45	1.17892	0.662571	2.7584	3.03458	1.49012	1.48441	1.9721	2.33312	3.06349	5.02125	NO	0.920747	2.89649		1.48727	2.15261		1.95776	8.59082321495332e-07	Up	1.3104	2.65014964206506e-06	Up
241	chr6:86353887-86353957	n-Tg8|chr6_317_tRNAGly_CCC+	yes	4.55159	0	4.60326	0	5.43501	0	5.96468	0	2.29856	1.87569	3.67781	3.51635	2.76652	2.72068	2.29683	2.48459	4.57743	5.69984	NO	2.08712	3.59708	NO	2.7436	2.39071	NO	1.12242	0.000900486	Up	1.86284	2.82362354471284e-11	Up
242	chr6:120876571-120876670	B2_Mm1a_B2_SINE-_and_B1_Mus1_Alu_SINE-	no	1.92756	0	1.87344	0	0.823164	0	1.37758	0	0.277548	0.132685	0.356453	0.702943	0.979386	0.872155	0.129055	0.539118	1.9005	1.10037	NO	0.205116	0.529698	YES	0.925771	0.334087	YES	-0.800127	0.0144019	Null	0.916266	0.00145168	Up
243	chr6:128710011-128710362	B4A_SINE_B4-	yes	4.03196	14.82	4.36612	14.49	5.49361	12.96	5.87599	11.95	2.20806	1.6459	3.59783	3.738	2.43857	2.47078	2.44296	2.6763	4.19904	5.6848	NO	1.92698	3.66791	NO	2.45468	2.55963	NO	1.48576	3.51052658341786e-05	Up	1.63598	3.42086645497569e-09	Up
244	chr6:128710725-128710819	Rn4.5s|4.5SRNA_scRNA-	yes	3.46581	0.14	3.52476	0.24	2.88152	0	3.58469	0	1.87799	0.871044	1.54442	1.73616	1.89913	1.70309	0.342466	0.58418	3.49529	3.23311	NO	1.37452	1.64029	NO	1.80111	0.463323	NO	-1.44094	2.46124460421337e-05	Down	1.60797	3.4664090429016e-09	Up
245	chr6:128714147-128714241	Rn4.5s|4.5SRNA_scRNA-	yes	4.00966	0	4.31022	0	4.4546	0	4.65617	0	1.94133	1.60073	2.89812	2.87624	2.36195	2.46886	1.77286	1.98918	4.15994	4.55539	NO	1.77103	2.88718	NO	2.41541	1.88102	NO	0.297253	0.424575	Null	1.65271	1.3230580545117e-09	Up
246	chr6:128748852-128749049	B4A_SINE_B4-	yes	4.39239	14.77	4.49302	15.89	4.25207	97.01	4.5604	93.71	2.31549	1.87816	2.27308	2.62571	2.70432	2.75155	1.31788	1.63665	4.44271	4.40623	NO	2.09683	2.4494	NO	2.72794	1.47727	NO	-0.0364736	0.923305	Null	1.60324	6.8786023328247e-09	Up
247	chr6:128749420-128749559	Rn4.5s|4.5SRNA_scRNA-	yes	4.26168	0.06	4.14463	0.15	2.14448	0	2.28333	0	1.93435	1.27238	0.863956	0.670504	2.3938	2.1861	0.499855	0.357723	4.20315	2.21391	NO	1.60337	0.76723	NO	2.28995	0.428789	NO	-2.12717	3.96922227422286e-10	Down	1.03313	0.000166342	Up
248	chr6:128753032-128753126	Rn4.5s|4.5SRNA_scRNA-	yes	4.5628	0	4.55959	0	2.06108	0	2.52436	0	2.27081	1.92949	0.767349	1.00263	2.64334	2.61588	0.465349	0.484083	4.56119	2.29272	NO	2.10015	0.884987	NO	2.62961	0.474716	NO	-2.34035	6.2456899101324e-12	Down	0.953222	0.000544457	Up
249	chr6:128788477-128788563	Rn4.5s|4.5SRNA_scRNA+	yes	4.58593	0	4.51685	0	5.38853	0	5.6865	0	2.49609	1.81175	3.43135	3.53802	2.91845	2.5222	2.38015	2.55737	4.55139	5.53751	NO	2.15392	3.48469	NO	2.72033	2.46876	NO	1.00092	0.00378227	Up	1.58496	5.71324036152082e-09	Up
250	chr6:128788924-128789196	B4A_SINE_B4+	yes	4.41071	1.45	4.42423	1.26	5.15913	1.11	5.55077	1.19	2.1723	1.61638	3.32493	3.37299	2.55795	2.33649	1.98071	2.25698	4.41747	5.35495	NO	1.89434	3.34896	NO	2.44722	2.11884	NO	0.937476	0.00384819	Up	1.783	1.551142678433e-10	Up
251	chr6:128793305-128793400	Rn4.5s|4.5SRNA_scRNA+	yes	3.9639	0	4.11847	0	4.42785	0	4.74133	0	1.82571	1.52391	2.60716	2.58647	2.27886	2.18125	1.53286	1.8001	4.04119	4.58459	NO	1.67481	2.59682	NO	2.23005	1.66648	NO	0.663375	0.0599397	Null	1.48741	4.33055694600111e-08	Up
252	chr6:128796113-128796212	B2_Mm1a_B2_SINE-	no	0.727884	6.23	0.426549	7.89	2.57618	6.75	2.98177	7.88	-0.249805	-0.285942	1.29392	1.3449	0.271264	-0.257937	0.493074	0.824464	0.577216	2.77897	NO	-0.267874	1.31941	YES	0.00666337	0.658769	YES	2.20176	1.04696821884649e-07	Up	0.935178	0.00112825	Up
253	chr6:135217793-135217866	n-Tv20|chr6_651_tRNAVal_GAC-	yes	-0.593048	3.94	0.183393	3.23	0.279851	3.14	0.364884	4.78	-0.0879161	0.222686	0.479791	0.428795	-0.327797	0.223375	0.793941	0.67741	-0.204828	0.322367	YES	0.0673848	0.454293	YES	-0.0522112	0.735675	YES	0.527195	0.116797	Null	-0.400978	0.224359	Null
254	chr6:149096989-149097088	B2_Mm1t_B2_SINE-	no	1.5878	0	1.51008	0	0.92445	0	0.182238	0	1.10145	0.256571	0.385611	0.32614	0.630088	0.623613	0.0981319	0.681024	1.54894	0.553344	NO	0.679012	0.355875	YES	0.62685	0.389578	YES	-0.995595	0.00361136	Down	-0.0858643	0.834306	Null
255	chr7:19886593-19886678	n-Ts2|chr7_86_tRNASeC(e)_TCA+	yes	3.9665	0	4.24578	0	6.65464	0	7.22446	0	2.37285	1.85345	4.80257	4.68753	2.11187	2.00999	3.54661	3.78548	4.10614	6.93955	NO	2.11315	4.74505	NO	2.06093	3.66604	NO	2.83341	2.18202397303704e-09	Up	1.02678	0.00030489	Up
256	chr7:26052529-26052628	NA_13	no	1.32437	0	1.44597	0	-1.46167	0	-1.29661	0	-0.192283	0.158486	-1.4455	-1.56921	0.0935026	0.462034	-1.18964	-1.20779	1.38517	-1.37914	NO	-0.0168987	-1.50736	YES	0.277768	-1.19871	YES	-2.76431	1.47521804253872e-09	Down	-0.0139804	0.985457	Null
257	chr7:28259631-28259730	NA_14	no	1.64178	0	1.69679	0	-0.556042	0	-0.0178669	0	0.234628	0.171982	-0.67387	-0.576333	0.431507	0.208847	-0.355205	0.155439	1.66929	-0.286954	NO	0.203305	-0.625101	YES	0.320177	-0.0998831	YES	-1.95624	7.06767699337513e-07	Down	-0.408346	0.2159	Null
258	chr7:29158018-29158112	n-Ti16|chr7_156_tRNAIle_TAT_I+	yes	4.2173	0	4.7489	0	5.99793	0	6.37603	0	2.05941	2.16466	4.12717	4.16952	2.57604	2.98594	2.92703	3.2088	4.4831	6.18698	NO	2.11203	4.14834	NO	2.78099	3.06791	NO	1.70388	7.20217598385637e-06	Up	1.74939	3.20233649613959e-10	Up
259	chr7:29579007-29579079	n-Tk24|chr7_1276_tRNALys_TTT-	yes	1.76762	0	1.26719	0	4.13934	0	4.53797	0	0.406421	0.51993	2.72419	2.74336	1.01829	0.660493	1.89645	2.08515	1.51741	4.33865	NO	0.463175	2.73377	YES	0.839394	1.9908	NO	2.82125	2.35278637740022e-09	Up	1.11919	7.64028193831014e-05	Up
260	chr7:36019789-36019862	n-Tt9|chr7_1213_tRNAThr_AGT-	yes	4.19124	0	4.12045	0	5.17792	0	5.56619	0	2.08558	1.49572	3.18371	3.47215	2.22411	2.05788	1.91343	2.35109	4.15585	5.37206	NO	1.79065	3.32793	NO	2.14099	2.13226	NO	1.21621	0.000325704	Up	1.54601	2.28138440445592e-08	Up
261	chr7:52740591-52740766	B2_Mm2_SINE_B2+	yes	1.5266	0	1.853	0	-0.322581	0	0.274819	0	-0.309223	0.251467	-0.758272	-0.397407	0.463999	0.486109	-0.609641	-0.707227	1.6898	-0.0238811	NO	-0.0288782	-0.577839	YES	0.475054	-0.658434	YES	-1.71368	7.12042548610999e-06	Down	0.584527	0.0595082	Null
262	chr7:54241133-54241232	B2_Mm2_B2_SINE-	no	1.48939	0.35	1.81165	0.41	0.54132	0.56	0.473893	0.24	0.504346	0.448824	-0.0664393	-0.324581	0.743176	0.767276	-0.205252	0.375834	1.65052	0.507607	NO	0.476585	-0.19551	YES	0.755226	0.0852914	YES	-1.14291	0.000586868	Down	-0.00216089	0.996173	Null
263	chr7:59763599-59763698	B3_B2_SINE+	no	1.95042	0	2.04449	0	0.554663	0	0.855431	0	0.197882	0.489469	0.411555	0.705829	0.663243	0.943522	0.153087	0.173273	1.99745	0.705047	NO	0.343675	0.558692	YES	0.803383	0.16318	YES	-1.2924	0.000150207	Down	0.855219	0.00326981	Up
264	chr7:65654685-65654756	n-Te17|chr7_337_tRNAGlu_TTC+	yes	3.8653	0	4.2894	0	4.05181	0	4.79108	0	1.84222	1.76998	2.3984	2.48831	2.06887	2.40057	1.17097	1.43545	4.07735	4.42144	NO	1.8061	2.44335	NO	2.23472	1.30321	NO	0.344094	0.322719	Null	1.56876	1.45226749560477e-08	Up
265	chr7:86611305-86611377	n-Tr19|chr7_387_tRNAArg_TCG+	yes	4.96567	0	4.65279	0	6.03443	0	6.50684	0	2.52664	1.84488	3.95834	4.05915	3.08316	2.73557	2.94378	3.12301	4.80923	6.27063	NO	2.18576	4.00874	NO	2.90936	3.03339	NO	1.46141	4.86154308330649e-05	Up	1.69895	9.33965903737133e-10	Up
266	chr7:105963925-105963996	n-Tp18|chr7_441_tRNAPro_TGG+	yes	4.53376	0	4.81231	0	5.87084	0	6.47679	0	2.46865	2.10375	3.88175	3.95274	2.84697	2.9947	2.69885	2.92448	4.67304	6.17382	NO	2.2862	3.91725	NO	2.92084	2.81166	NO	1.50078	4.2298696521701e-05	Up	1.74023	3.88699457967984e-10	Up
267	chr7:105964186-105964257	n-Tp7|chr7_977_tRNAPro_AGG-	yes	3.62963	0	4.24561	0	5.44567	0	6.08979	0	1.43978	1.56424	3.36845	3.44962	1.97921	2.45573	2.25866	2.39618	3.93762	5.76773	NO	1.50201	3.40904	NO	2.21747	2.32742	NO	1.83011	5.06418229348313e-06	Up	1.79708	1.20101618905874e-10	Up
268	chr7:106692410-106692481	n-Te3|chr7_967_tRNAGlu_CTC-	yes	-0.330512	0	0.0110734	0	0.278433	0	-0.0716532	0	-0.316176	-0.387108	0.45631	-0.161101	-0.170887	0.0209809	-0.115704	0.265749	-0.159719	0.10339	YES	-0.351642	0.147604	YES	-0.0749532	0.0750223	YES	0.263109	0.428741	Null	0.349271	0.305826	Null
269	chr7:117336693-117336856	B1_Mus1_SINE_Alu-	yes	3.015	0	2.70684	0	-0.0400922	0	0.191305	0	1.26438	0.889791	-0.182086	0.0891828	1.47851	1.27021	-0.193171	0.0247641	2.86092	0.0756062	NO	1.07709	-0.0464518	YES	1.37436	-0.0842036	NO	-2.78531	1.67436922722497e-09	Down	0.335022	0.329119	Null
270	chr7:127978993-127979074	n-Tl27|chr7_861_tRNALeu_TAG-	yes	4.16956	0	4.65009	0	5.83429	0	6.26312	0	1.85462	1.96704	3.9669	3.83351	2.12378	2.75469	2.67797	2.89016	4.40983	6.04871	NO	1.91083	3.90021	NO	2.43923	2.78406	NO	1.63888	1.22373898231264e-05	Up	1.64455	2.85723371457159e-09	Up
271	chr7:127986097-127986293	B1_Mus1_SINE_Alu-	yes	2.44977	0	2.25939	0	3.78256	0	4.40833	0	0.514349	-0.0350392	2.00595	2.09217	0.585248	0.547684	1.10942	1.38746	2.35458	4.09545	NO	0.239655	2.04906	YES	0.566466	1.24844	YES	1.74086	5.44516936697321e-06	Up	1.12743	6.68537710397982e-05	Up
272	chr7:128061031-128061112	n-Tl4|chr7_559_tRNALeu_AAG+	yes	3.9915	0	3.64467	0	5.43175	0	5.91272	0	1.71959	0.8993	3.23827	3.38224	2.35324	1.97016	2.35581	2.55208	3.81809	5.67223	NO	1.30944	3.31025	NO	2.1617	2.45394	NO	1.85415	1.84291945426674e-06	Up	1.70857	7.53505326821385e-10	Up
273	chr7:128062206-128062333	MIR_SINE_MIR-	yes	4.97921	0	5.43905	0	6.48272	0	7.24396	0	2.78926	3.06908	4.64592	4.65725	3.41441	4.0145	3.68275	3.89082	5.20913	6.86334	NO	2.92917	4.65159	NO	3.71445	3.78678	NO	1.65421	2.02283877626388e-05	Up	1.65009	2.54959371084167e-09	Up
274	chr7:128147749-128147848	B2_Mm1t_B2_SINE+	no	1.95606	6.51	1.50243	11.97	0.0180621	12.23	0.0352998	12	0.404585	0.311455	-0.562859	-0.332921	0.52945	0.384406	-0.421912	-0.250955	1.72925	0.026681	NO	0.35802	-0.44789	YES	0.456928	-0.336434	YES	-1.70257	4.99040627679741e-06	Down	-0.0125486	0.9873	Null
275	chr7:133786811-133786910	B2_Mm1a_B2_SINE-	no	1.64314	29.54	2.01266	23.91	3.27637	28.96	3.98651	30.84	0.044206	0.405713	1.87422	1.80921	0.753018	0.622397	1.00391	0.872953	1.8279	3.63144	NO	0.224959	1.84171	YES	0.687708	0.93843	YES	1.80354	4.83257366584372e-06	Up	1.36603	9.16197808337063e-07	Up
276	chr7:133824516-133824806	B1_Mus1_SINE_Alu-	yes	2.6909	0	3.10484	0	0.436022	0	0.919758	0	0.865031	1.08112	-0.230421	-0.118549	1.22468	1.52121	-0.0274249	-0.368658	2.89787	0.67789	NO	0.973077	-0.174485	YES	1.37295	-0.198042	NO	-2.21998	1.2610858511393e-07	Down	0.423426	0.196885	Null
277	chr7:133920329-133920428	NA_15	no	1.51101	0	1.67831	0	-0.621296	0	-0.538975	0	0.67799	0.0547866	-0.825233	-0.855613	-0.00164115	0.476312	-0.694839	-0.268562	1.59466	-0.580135	NO	0.366388	-0.840423	YES	0.237335	-0.481701	YES	-2.1748	7.95850182877678e-08	Down	-0.487775	0.126924	Null
278	chr8:14842649-14843098	B2_Mm2_SINE_B2+	yes	2.68835	0	3.17725	0	0.606182	0	0.788666	0	0.819573	1.32937	-0.0749737	0.304528	1.24128	1.85355	0.179561	0.18228	2.9328	0.697424	NO	1.07447	0.114777	YES	1.54742	0.180921	NO	-2.23538	8.63650347593403e-08	Down	0.406803	0.217347	Null
279	chr8:39276255-39276337	n-Tl14|chr8_168_tRNALeu_CAG+	yes	-0.174612	9.99	-0.316474	17.18	-0.492552	28.47	0.31319	8.02	-0.0953404	-0.344471	-0.532784	-0.226391	-0.248568	-0.449904	-0.345513	-0.56456	-0.245543	-0.089681	YES	-0.219905	-0.379587	YES	-0.349236	-0.455036	YES	0.155862	0.675139	Null	-0.0538814	0.902768	Null
280	chr8:73222611-73222710	NA_16	no	2.35053	0	3.03408	0	0.129003	0	0.397692	0	-0.13582	0.231333	-0.325761	-0.506632	-0.118128	0.670952	-0.0918984	0.387687	2.6923	0.263348	NO	0.0477568	-0.416197	YES	0.276412	0.147894	YES	-2.42895	3.90908932251645e-08	Down	-0.335435	0.32879	Null
281	chr8:82433177-82433249	n-Tk20|chr8_317_tRNALys_TTT+	yes	0.26645	0	-0.238544	0	0.183831	0	-0.335836	0	-0.0670986	0.201504	-0.503687	-0.122973	0.295835	-0.141743	0.0215482	-0.59818	0.0139531	-0.0760026	YES	0.0672028	-0.31333	YES	0.077046	-0.288316	YES	-0.0899557	0.812081	Null	-0.0151713	0.983768	Null
282	chr8:86809783-86809882	B3_B2_SINE+_and_B1_Mm_Alu_SINE+	no	0.922958	4.9	0.321718	3.6	3.04752	1.94	3.41901	2.92	0.48637	0.519652	1.38621	1.39453	0.322824	-0.000564852	1.03401	1.15286	0.622338	3.23327	NO	0.503011	1.39037	YES	0.16113	1.09344	YES	2.61093	1.07364142569113e-08	Up	-0.0449532	0.922419	Null
283	chr8:87404850-87404949	B2_Mm2_B2_SINE-	no	1.38011	0	2.01645	0	3.11452	0	3.67399	0	0.521639	0.37198	1.65295	1.74302	0.591265	0.803789	0.869471	1.00905	1.69828	3.39425	NO	0.446809	1.69798	YES	0.697527	0.939259	YES	1.69598	1.27564994647782e-05	Up	1.00944	0.000391318	Up
284	chr8:97227531-97227613	n-Tl17|chr8_414_tRNALeu_CAG+	yes	4.41478	0	5.05908	0	5.75187	0	6.34164	0	1.86166	2.10827	4.11522	4.07318	2.58209	3.26737	3.00114	2.78804	4.73693	6.04676	NO	1.98496	4.0942	NO	2.92473	2.89459	NO	1.30983	0.000334483	Up	2.13936	1.06037647958552e-13	Up
285	chr8:97227904-97227986	n-Tl16|chr8_1008_tRNALeu_CAG-	yes	5.14035	0	5.74623	0	4.52743	0	5.23199	0	2.96446	2.87518	3.11023	2.90129	3.45132	3.88419	1.85163	1.89707	5.44329	4.87971	NO	2.91982	3.00576	NO	3.66776	1.87435	NO	-0.563579	0.104194	Null	1.87934	2.01874268182371e-11	Up
286	chr8:113154453-113154523	n-Tg16|chr8_887_tRNAGly_GCC-	yes	0.673123	0	0.290571	0	1.6864	0	2.1225	0	-0.156923	-0.503217	0.170484	0.583238	0.2185	-0.215696	-0.148806	-0.0350719	0.481847	1.90445	NO	-0.33007	0.376861	YES	0.00140162	-0.0919387	YES	1.4226	6.89182882182732e-05	Up	0.800271	0.00630614	Null
287	chr8:113155146-113155216	n-Tg15|chr8_886_tRNAGly_GCC-	yes	1.07036	0	0.494692	0	0.937332	0	1.69568	0	0.598722	-0.189304	0.231513	0.158087	0.656061	0.237355	-0.402165	-0.206822	0.782525	1.31651	YES	0.204709	0.1948	YES	0.446708	-0.304494	YES	0.533982	0.12505	Null	0.741293	0.0122988	Null
288	chr8:113522107-113522266	B2_Mm1t_SINE_B2+	yes	2.84401	0	2.34279	0	3.50943	0	3.9609	0	0.577991	0.217472	1.98634	2.0138	0.83558	0.641964	0.887464	0.953393	2.5934	3.73517	NO	0.397732	2.00007	YES	0.738772	0.920429	YES	1.14177	0.000943839	Up	1.42068	3.08069054901274e-07	Up
289	chr8:113586461-113586531	n-Tg10|chr8_560_tRNAGly_GCC+	yes	3.97604	0	3.62503	0	5.16581	0	5.94524	0	1.61014	1.1586	3.35738	3.52814	2.20305	2.02564	2.27448	2.63003	3.80054	5.55553	NO	1.38437	3.44276	NO	2.11434	2.45225	NO	1.75499	8.04472701378242e-06	Up	1.72047	5.99786085933919e-10	Up
290	chr8:124103129-124103201	n-Tm17|chr8_783_tRNAMet_CAT-	yes	4.73155	0	5.17185	0	6.07606	0	6.48176	0	2.57802	2.48752	4.08195	4.15868	3.04119	3.35459	2.90094	3.24201	4.9517	6.27891	NO	2.53277	4.12031	NO	3.19789	3.07147	NO	1.32721	0.00016508	Up	1.71396	6.97954428715103e-10	Up
291	chr8:126062686-126062804	Rn5S|5S_rRNA	yes	1.78578	100	1.83976	100	4.79212	100	5.22793	100	0.193841	0.0140079	2.39414	2.84856	0.354366	0.46679	1.67047	2.01322	1.81277	5.01003	NO	0.103925	2.62135	YES	0.410578	1.84185	NO	3.19726	2.19483442704186e-10	Up	1.08616	0.000123343	Up
292	chr8:126064393-126064511	Rn5S|5S_rRNA	yes	0.394163	87.09	0.570023	85.25	3.38244	100	4.02823	99.94	-0.182596	-0.223891	1.06947	1.53645	-0.151027	-0.0543853	0.543986	0.867959	0.482093	3.70533	NO	-0.203243	1.30296	YES	-0.102706	0.705972	YES	3.22324	3.18043148136378e-10	Up	0.697524	0.0199185	Null
293	chr8:126066078-126066196	Rn5S|5S_rRNA	yes	1.0626	98.88	1.19956	94.67	4.61206	100	5.01039	99.98	0.0152438	-0.157904	2.13448	2.63918	0.0553403	0.162988	1.45055	1.82241	1.13108	4.81123	NO	-0.07133	2.38683	YES	0.109164	1.63648	YES	3.68015	2.4182846696335e-11	Up	0.930844	0.001191	Up
294	chr8:126067773-126067891	Rn5S|5S_rRNA	yes	2.18582	100	2.25374	100	4.93349	100	5.29228	100	0.40234	0.184508	2.55233	3.00677	0.514217	0.665817	1.87456	2.22037	2.21978	5.11288	NO	0.293424	2.77955	YES	0.590017	2.04747	NO	2.89311	8.6143282892665e-10	Up	1.02868	0.00029685	Up
295	chr8:126069478-126069596	Rn5S|5S_rRNA	yes	2.21555	100	2.29924	100	5.29017	99.94	5.65595	100	0.407281	0.125525	2.80722	3.26808	0.573048	0.728834	2.05095	2.43241	2.2574	5.47306	NO	0.266403	3.03765	YES	0.650941	2.24168	NO	3.21566	1.74569792610006e-10	Up	1.18051	2.80361302353523e-05	Up
296	chr8:126071165-126071283	Rn5S|5S_rRNA	yes	2.13131	100	2.24014	100	5.16118	100	5.4736	100	0.394324	0.101656	2.72908	3.20275	0.49564	0.658229	2.01589	2.36831	2.18572	5.31739	NO	0.24799	2.96592	YES	0.576935	2.1921	NO	3.13167	2.51713120267156e-10	Up	1.10276	9.68232010965768e-05	Up
297	chr8:126072856-126072974	Rn5S|5S_rRNA	yes	1.95509	100	2.00737	100	4.46786	100	4.7789	100	0.342143	0.0960102	2.05488	2.57848	0.555433	0.479572	1.37739	1.64482	1.98123	4.62338	NO	0.219076	2.31668	YES	0.517503	1.5111	YES	2.64216	3.64769237342028e-09	Up	1.104	9.60375207246321e-05	Up
298	chr8:126074567-126074685	Rn5S|5S_rRNA	yes	2.08404	100	2.17545	100	5.18084	100	5.55143	100	0.361718	0.0738648	2.71212	3.17818	0.494124	0.649482	1.95394	2.33197	2.12974	5.36613	NO	0.217791	2.94515	YES	0.571803	2.14295	NO	3.23639	1.62040690588672e-10	Up	1.1562	4.12013377138262e-05	Up
299	chr8:126076264-126076382	Rn5S|5S_rRNA	yes	2.08404	100	2.17545	100	5.18084	100	5.55143	100	0.361718	0.0738648	2.71212	3.17818	0.494124	0.649482	1.95394	2.33197	2.12974	5.36613	NO	0.217791	2.94515	YES	0.571803	2.14295	NO	3.23639	1.62040690588672e-10	Up	1.1562	4.12013377138262e-05	Up
300	chr8:126079663-126079781	Rn5S|5S_rRNA	yes	2.14112	100	2.19012	100	5.00935	100	5.42937	100	0.369888	0.158971	2.56967	3.01863	0.513065	0.657214	1.82843	2.2074	2.16562	5.21936	NO	0.264429	2.79415	YES	0.585139	2.01792	NO	3.05375	3.96850730804811e-10	Up	1.09694	0.000103767	Up
301	chr8:126081390-126081508	Rn5S|5S_rRNA	yes	2.1459	100	2.21028	100	5.0291	100	5.45683	100	0.448626	0.187748	2.59417	3.03288	0.572855	0.718213	1.84551	2.22594	2.17809	5.24297	NO	0.318187	2.81352	YES	0.645534	2.03573	NO	3.06488	3.96850730804811e-10	Up	1.10514	9.4541602208325e-05	Up
302	chr8:126083101-126083219	Rn5S|5S_rRNA	yes	1.87121	100	1.97079	99.73	3.69238	100	4.28535	100	0.409478	0.167516	1.43376	1.98951	0.419513	0.483929	1.05059	1.1641	1.921	3.98886	NO	0.288497	1.71163	YES	0.451721	1.10735	YES	2.06786	3.45934786740603e-07	Up	0.767511	0.00918279	Null
303	chr8:126084788-126084906	Rn5S|5S_rRNA	yes	2.08404	100	2.17545	100	5.18084	100	5.55143	100	0.361718	0.0738648	2.71212	3.17818	0.494124	0.649482	1.95394	2.33197	2.12974	5.36613	NO	0.217791	2.94515	YES	0.571803	2.14295	NO	3.23639	1.62040690588672e-10	Up	1.1562	4.12013377138262e-05	Up
304	chr8:126086495-126086613	Rn5S|5S_rRNA	yes	0.504609	100	0.632916	100	2.43728	100	3.01768	100	-0.305733	-0.350511	0.480208	0.928742	-0.303808	-0.17583	0.268167	0.460728	0.568762	2.72748	NO	-0.328122	0.704475	YES	-0.239819	0.364448	YES	2.15872	1.73589135473389e-07	Up	0.42833	0.190793	Null
305	chr8:126088186-126088304	Rn5S|5S_rRNA	yes	0.763444	100	1.05213	96.32	2.63013	97	3.29959	96.37	-0.13639	-0.136312	0.597537	2.10487	-0.128242	-0.0329876	1.08199	0.867078	0.907785	2.96486	NO	-0.136351	1.3512	YES	-0.0806149	0.974536	YES	2.05708	5.20730393814794e-07	Up	0.432405	0.18671	Null
306	chr8:126089866-126089987	Rn5S_like|5S_from_RepeatMasker	yes	1.7257	100	1.67615	99.33	4.33779	99.4	4.63779	99.12	0.249146	0.0531282	2.09744	2.4716	0.253151	0.243255	1.4364	1.78246	1.70092	4.48779	NO	0.151137	2.28452	NO	0.248203	1.60943	YES	2.78687	1.45925615094863e-09	Up	0.772155	0.00871682	Null
307	chr8:126091537-126091655	Rn5S|5S_rRNA	yes	2.18582	100	2.25374	100	4.93349	100	5.29228	100	0.40234	0.184508	2.55233	3.00677	0.514217	0.665817	1.87456	2.22037	2.21978	5.11288	NO	0.293424	2.77955	YES	0.590017	2.04747	NO	2.89311	8.6143282892665e-10	Up	1.02868	0.00029685	Up
308	chr8:126093228-126093346	Rn5S|5S_rRNA	yes	2.03366	100	2.02123	100	4.31931	100	4.62987	100	0.442089	0.0889886	1.91607	2.44069	0.622792	0.503516	1.27282	1.55476	2.02745	4.47459	NO	0.265539	2.17838	YES	0.563154	1.41379	YES	2.44715	1.29531758135142e-08	Up	1.06221	0.000179143	Up
309	chr8:126094901-126095019	Rn5S|5S_rRNA	yes	0.504609	100	0.632916	100	2.43728	100	3.01768	100	-0.305733	-0.350511	0.480208	0.928742	-0.303808	-0.17583	0.268167	0.460728	0.568762	2.72748	NO	-0.328122	0.704475	YES	-0.239819	0.364448	YES	2.15872	1.73589135473389e-07	Up	0.42833	0.190793	Null
310	chr8:126096610-126096728	Rn5S|5S_rRNA	yes	2.21134	100	2.24127	100	3.57608	100	4.16706	100	0.711718	0.285938	1.30893	1.98141	0.735441	0.647186	1.00794	1.15274	2.22631	3.87157	NO	0.498828	1.64517	YES	0.691314	1.08034	YES	1.64526	1.02479972917364e-05	Up	0.757312	0.010245	Null
311	chr8:126098297-126098415	Rn5S|5S_rRNA	yes	2.14112	100	2.19012	100	5.00935	100	5.42937	100	0.369888	0.158971	2.56967	3.01863	0.513065	0.657214	1.82843	2.2074	2.16562	5.21936	NO	0.264429	2.79415	YES	0.585139	2.01792	NO	3.05375	3.96850730804811e-10	Up	1.09694	0.000103767	Up
312	chr8:126099976-126100094	Rn5S|5S_rRNA	yes	2.19757	100	2.28907	100	5.30779	100	5.6735	99.98	0.396848	0.154656	2.82811	3.29466	0.582616	0.738344	2.06963	2.45502	2.24332	5.49064	NO	0.275752	3.06138	YES	0.66048	2.26232	NO	3.24732	1.62040690588672e-10	Up	1.18379	2.65409734132423e-05	Up
313	chr8:126101655-126101773	Rn5S|5S_rRNA	yes	2.1459	100	2.21028	100	5.0291	100	5.45683	100	0.448626	0.187748	2.59417	3.03288	0.572855	0.718213	1.84551	2.22594	2.17809	5.24297	NO	0.318187	2.81352	YES	0.645534	2.03573	NO	3.06488	3.96850730804811e-10	Up	1.10514	9.4541602208325e-05	Up
314	chr8:126103350-126103468	Rn5S|5S_rRNA	yes	1.97276	100	1.94646	100	4.54827	100	4.92661	100	0.355022	0.109357	2.25104	2.66151	0.353656	0.372361	1.60681	1.90698	1.95961	4.73744	NO	0.23219	2.45627	YES	0.363008	1.75689	NO	2.77783	1.72763821488354e-09	Up	0.830201	0.00445927	Up
315	chr8:126105055-126105173	Rn5S|5S_rRNA	yes	2.16745	100	2.17733	100	4.23745	100	4.82807	100	0.690763	0.262932	1.78737	2.3506	0.7384	0.63839	1.20109	1.48947	2.17239	4.53276	NO	0.476847	2.06898	YES	0.688395	1.34528	YES	2.36037	4.23481484130043e-08	Up	0.935249	0.00112825	Up
316	chr8:126106747-126106868	Rn5S_like|5S_from_RepeatMasker	yes	2.21308	65.73	2.38411	67.59	2.82337	99.06	3.39612	99.7	0.688868	0.360612	0.899812	1.2999	0.768527	1.02517	0.57234	0.670929	2.2986	3.10975	NO	0.52474	1.09986	YES	0.896848	0.621634	YES	0.811147	0.0137109	Null	0.850331	0.00347216	Up
317	chr8:126108435-126108553	Rn5S|5S_rRNA	yes	0.614676	100	0.718317	100	2.43728	100	3.01768	100	-0.188584	-0.295006	0.480208	0.928742	-0.20527	-0.100736	0.268167	0.460728	0.666496	2.72748	NO	-0.241795	0.704475	YES	-0.153003	0.364448	YES	2.06098	3.53888994525008e-07	Up	0.428819	0.190723	Null
318	chr8:126110142-126110260	Rn5S|5S_rRNA	yes	2.25485	100	2.2711	100	4.97243	100	5.30253	100	0.438566	0.205998	2.6064	3.04698	0.576313	0.677524	1.9099	2.26197	2.26297	5.13748	NO	0.322282	2.82669	YES	0.626918	2.08593	NO	2.8745	9.07836651657163e-10	Up	1.04539	0.000231209	Up
319	chr8:126111859-126111977	Rn5S|5S_rRNA	yes	0.417357	100	0.565674	100	3.3951	100	4.05661	99.94	-0.130238	-0.203355	1.062	1.55037	-0.189424	-0.0932068	0.547071	0.878471	0.491516	3.72585	NO	-0.166796	1.30619	YES	-0.141315	0.712771	YES	3.23434	3.11016125795115e-10	Up	0.618897	0.0435981	Null
320	chr8:126113554-126113672	Rn5S|5S_rRNA	yes	2.1784	100	2.24106	100	4.66389	100	4.97356	100	0.464386	0.175494	2.2458	2.77369	0.692866	0.677	1.55672	1.81209	2.20973	4.81872	NO	0.31994	2.50974	YES	0.684933	1.68441	NO	2.60899	4.58447235930136e-09	Up	1.19033	2.37835460608307e-05	Up
321	chr8:126115271-126115389	Rn5S|5S_rRNA	yes	0.401172	100	0.5853	100	3.60398	100	4.25255	100	-0.216129	-0.30109	1.26585	1.72437	-0.216231	-0.10483	0.678718	0.983578	0.493236	3.92826	NO	-0.258609	1.49511	YES	-0.160531	0.831148	YES	3.43503	1.30799840825408e-10	Up	0.762045	0.00972004	Null
322	chr8:126116968-126117089	Rn5S_like|5S_from_RepeatMasker	yes	2.13709	100	2.1893	100	5.00475	100	5.42434	100	0.366435	0.158835	2.56514	3.01368	0.511328	0.658836	1.82363	2.20245	2.1632	5.21455	NO	0.262635	2.78941	YES	0.585082	2.01304	NO	3.05135	3.96850730804811e-10	Up	1.09882	0.000101585	Up
323	chr8:126118654-126118772	Rn5S|5S_rRNA	yes	2.14112	100	2.19012	100	5.00935	100	5.42937	100	0.369888	0.158971	2.56967	3.01863	0.513065	0.657214	1.82843	2.2074	2.16562	5.21936	NO	0.264429	2.79415	YES	0.585139	2.01792	NO	3.05375	3.96850730804811e-10	Up	1.09694	0.000103767	Up
324	chr8:126120357-126120475	Rn5S|5S_rRNA	yes	2.08404	100	2.17545	100	5.18084	100	5.55143	100	0.361718	0.0738648	2.71212	3.17818	0.494124	0.649482	1.95394	2.33197	2.12974	5.36613	NO	0.217791	2.94515	YES	0.571803	2.14295	NO	3.23639	1.62040690588672e-10	Up	1.1562	4.12013377138262e-05	Up
325	chr8:126122055-126122176	Rn5S_like|5S_from_RepeatMasker	yes	2.09098	87.53	2.26543	84.75	4.87514	98.73	5.20063	98.27	0.285547	0.28935	2.52856	2.96841	0.529537	0.808431	1.84824	2.20587	2.1782	5.03788	NO	0.287449	2.74849	YES	0.668984	2.02705	NO	2.85968	1.05273404273637e-09	Up	1.10297	9.68232010965768e-05	Up
326	chr8:126123761-126123879	Rn5S|5S_rRNA	yes	2.21295	53.78	2.18923	54.06	4.1078	98.06	4.63277	97.87	0.587135	0.201521	1.86276	2.59638	0.561346	0.594855	1.45138	1.46517	2.20109	4.37028	NO	0.394328	2.22957	YES	0.578101	1.45827	YES	2.1692	1.38157437074485e-07	Up	0.955069	0.000865599	Up
327	chr8:126125469-126125580	Rn5S_like|5S_from_RepeatMasker	yes	1.35964	100	1.35848	100	4.0707	100	4.49043	100	0.143615	-0.28875	1.68568	2.2179	0.169588	0.0099325	1.12013	1.45769	1.35906	4.28057	NO	-0.0725675	1.95179	YES	0.0897602	1.28891	YES	2.92151	8.25723208953585e-10	Up	0.825206	0.00473454	Up
328	chr8:126127147-126127265	Rn5S|5S_rRNA	yes	2.14584	100	2.22787	100	5.22724	100	5.59348	100	0.404848	0.146002	2.75356	3.21916	0.573129	0.712753	1.99626	2.37422	2.18686	5.41036	NO	0.275425	2.98636	YES	0.642941	2.18524	NO	3.2235	1.69792436782978e-10	Up	1.16863	3.42312956705265e-05	Up
329	chr8:126128848-126128966	Rn5S|5S_rRNA	yes	2.08404	100	2.17545	100	5.18084	100	5.55143	100	0.361718	0.0738648	2.71212	3.17818	0.494124	0.649482	1.95394	2.33197	2.12974	5.36613	NO	0.217791	2.94515	YES	0.571803	2.14295	NO	3.23639	1.62040690588672e-10	Up	1.1562	4.12013377138262e-05	Up
330	chr8:126130510-126130631	Rn5S_like|5S_from_RepeatMasker	yes	2.12964	100	2.23376	100	5.14879	100	5.46126	100	0.391553	0.0966948	2.71683	3.19067	0.493703	0.652675	2.00385	2.3564	2.1817	5.30503	NO	0.244124	2.95375	YES	0.573189	2.18012	NO	3.12333	2.59124903456203e-10	Up	1.10269	9.68232010965768e-05	Up
331	chr8:126132220-126132338	Rn5S|5S_rRNA	yes	2.08404	100	2.17545	100	5.18084	100	5.55143	100	0.361718	0.0738648	2.71212	3.17818	0.494124	0.649482	1.95394	2.33197	2.12974	5.36613	NO	0.217791	2.94515	YES	0.571803	2.14295	NO	3.23639	1.62040690588672e-10	Up	1.1562	4.12013377138262e-05	Up
332	chr8:126133917-126134035	Rn5S|5S_rRNA	yes	2.04701	97.94	2.09458	97.44	4.06317	96.72	4.42499	96.18	0.313671	0.0622342	1.6814	2.15885	0.436895	0.59377	1.0857	1.50282	2.0708	4.24408	NO	0.187952	1.92013	YES	0.515333	1.29426	YES	2.17329	9.93269096826655e-08	Up	0.953247	0.00088395	Up
333	chr8:126135615-126135733	Rn5S|5S_rRNA	yes	2.18582	100	2.25374	100	4.93349	100	5.29228	100	0.40234	0.184508	2.55233	3.00677	0.514217	0.665817	1.87456	2.22037	2.21978	5.11288	NO	0.293424	2.77955	YES	0.590017	2.04747	NO	2.89311	8.6143282892665e-10	Up	1.02868	0.00029685	Up
334	chr8:126137314-126137432	Rn5S|5S_rRNA	yes	2.1998	100	2.25746	100	5.2054	100	5.49455	100	0.430138	0.122681	2.78205	3.24639	0.557244	0.669896	2.05321	2.41069	2.22863	5.34998	NO	0.27641	3.01422	YES	0.61357	2.23195	NO	3.12135	2.51713120267156e-10	Up	1.11943	7.63662748450379e-05	Up
335	chr8:126138996-126139117	Rn5S_like|5S_from_RepeatMasker	yes	2.13709	100	2.1893	100	5.00475	100	5.42434	100	0.366435	0.158835	2.56514	3.01368	0.511328	0.658836	1.82363	2.20245	2.1632	5.21455	NO	0.262635	2.78941	YES	0.585082	2.01304	NO	3.05135	3.96850730804811e-10	Up	1.09882	0.000101585	Up
336	chr8:126140710-126140828	Rn5S|5S_rRNA	yes	2.16198	97.96	2.19642	96.79	5.06286	98.34	5.4203	98.43	0.426892	0.133873	2.60264	3.11472	0.580273	0.66826	1.87204	2.20971	2.1792	5.24158	NO	0.280382	2.85868	YES	0.624267	2.04087	NO	3.06238	3.79137423513926e-10	Up	1.16169	3.84015012531411e-05	Up
337	chr8:126142433-126142554	Rn5S_like|5S_from_RepeatMasker	yes	2.13709	100	2.1893	100	5.00475	100	5.42434	100	0.366435	0.158835	2.56514	3.01368	0.511328	0.658836	1.82363	2.20245	2.1632	5.21455	NO	0.262635	2.78941	YES	0.585082	2.01304	NO	3.05135	3.96850730804811e-10	Up	1.09882	0.000101585	Up
338	chr8:126144138-126144259	Rn5S_like|5S_from_RepeatMasker	yes	1.783	100	1.83962	100	4.78736	100	5.22261	100	0.191386	0.0141502	2.38941	2.84332	0.353372	0.468595	1.66539	2.00799	1.81131	5.00499	NO	0.102768	2.61636	YES	0.410984	1.83669	NO	3.19368	2.19611934120325e-10	Up	1.08789	0.000120261	Up
339	chr8:126145828-126145946	Rn5S|5S_rRNA	yes	2.03047	98.96	2.10974	99.12	3.70594	91.59	4.03294	92.75	0.269855	0.0796045	1.39083	1.88868	0.422796	0.646464	0.850067	1.1941	2.0701	3.86944	NO	0.17473	1.63975	YES	0.53463	1.02209	YES	1.79934	1.80102118334824e-06	Up	0.977569	0.000625927	Up
340	chr8:126147537-126147645	Rn5S|5S_rRNA	yes	1.36248	100	1.35761	100	4.07217	100	4.49226	100	0.146669	-0.289585	1.68714	2.21976	0.17027	0.00615015	1.12194	1.45958	1.36005	4.28222	NO	-0.0714581	1.95345	YES	0.0882102	1.29076	YES	2.92217	8.25723208953585e-10	Up	0.822356	0.00488733	Up
341	chr8:126149708-126149807	B2_Mm2_B2_SINE-	no	1.46588	0	1.73376	0	2.67504	0	2.91306	0	-0.310055	0.159294	1.17966	1.10991	0.450702	0.966587	0.676341	0.596187	1.59982	2.79405	NO	-0.0753801	1.14479	YES	0.708645	0.636264	YES	1.19424	0.000379459	Up	1.29255	3.73867187098996e-06	Up
342	chr9:14762877-14762949	n-Tk4|chr9_1514_tRNALys_CTT-	yes	0.131911	0	-0.245661	0	0.115719	0	-0.12485	0	0.419341	-0.146222	-0.286676	0.00919846	0.185724	-0.126487	-0.390995	-0.326729	-0.0568749	-0.00456547	YES	0.13656	-0.138739	YES	0.0296184	-0.358862	YES	0.0523094	0.892996	Null	0.113182	0.780421	Null
343	chr9:46080760-46081111	B2_Mm1a_SINE_B2-	yes	1.75901	0	1.75696	0	0.556749	0	1.005	0	0.698084	0.559067	-0.200451	0.0393758	1.01822	1.15874	-0.12871	-0.122041	1.75798	0.780874	NO	0.628575	-0.0805378	YES	1.08848	-0.125376	NO	-0.977111	0.00288744	Down	0.50474	0.111806	Null
344	chr9:56071625-56071724	LSU-rRNA_Hsa_rRNA_rRNA-	no	1.36977	93.91	1.91128	93.78	0.713578	93.5	1.01164	94.46	-0.022712	-0.0746533	-0.198354	0.263468	-0.0209292	0.0185784	0.77235	1.05858	1.64053	0.86261	NO	-0.0486826	0.0325568		-0.0011754	0.915466		-0.777918	0.0182	Null	-0.835402	0.00417598	Down
345	chr9:62981090-62981196	Rnu6|U6+	yes	2.4443	3.44	2.02396	1.78	6.05997	1.51	6.8148	1.74	1.1033	0.858572	4.16678	4.20329	0.625011	0.49202	2.87236	3.04	2.23413	6.43738	NO	0.980936	4.18504	NO	0.558516	2.95618	NO	4.20325	9.4522833123366e-12	Up	0.806436	0.00587539	Null
346	chr9:64585853-64585924	n-Tq9|chr9_342_tRNAGln_CTG+	yes	5.08302	0	5.38205	0	6.60305	0	7.20441	0	2.99761	2.6978	4.75747	4.69283	3.65082	3.52755	3.54219	3.81516	5.23254	6.90373	NO	2.84771	4.72515	NO	3.58919	3.67868	NO	1.6712	9.86295665448215e-06	Up	1.78795	1.40106871157516e-10	Up
347	chr9:65049244-65049401	B2_Mm1a_SINE_B2+	yes	2.63318	0.51	3.05044	0.35	1.9063	0	2.39332	0.05	0.679866	1.07915	0.607145	0.948686	1.55441	1.85545	1.03014	1.14039	2.84181	2.14981	NO	0.879506	0.777916	YES	1.70493	1.08526	NO	-0.691997	0.035775	Null	0.518076	0.101234	Null
348	chr9:66003087-66003186	B2_Mm2_B2_SINE-	no	1.67191	0	1.87146	0	-0.238806	0	0.0955633	0	0.424302	1.04582	0.269833	-0.0647166	0.566697	0.802581	0.10653	-0.0879298	1.77169	-0.0716212	NO	0.735062	0.102558	YES	0.684639	0.00929986	YES	-1.84331	1.33058332124881e-06	Down	0.0428352	0.925566	Null
349	chr9:66919915-66920014	B2_Mm2_B2_SINE-	no	1.78641	0	2.28413	0	2.11955	0	2.48774	0	0.617203	0.50192	0.948812	0.655101	0.802572	0.839652	0.0205257	0.309568	2.03527	2.30365	NO	0.559562	0.801957	YES	0.821112	0.165047	YES	0.268382	0.428741	Null	0.898461	0.0018516	Up
350	chr9:74956737-74956819	n-Ta4|chr9_1100_tRNAAla_AGC-	yes	-0.244006	0	0.0896617	0	-0.290258	0	-0.0923438	0	0.24666	0.118232	0.202293	-0.301316	0.0434603	0.0688067	-0.215177	-0.232251	-0.0771719	-0.191301	YES	0.182446	-0.0495112	YES	0.0561335	-0.223714	YES	-0.114129	0.747587	Null	0.0478903	0.914809	Null
351	chr9:78023110-78023440	Rn7sk|7SK-	yes	4.62248	24.06	4.53634	21.28	6.13559	34.12	6.59407	34.15	2.84306	2.28758	3.95786	3.95266	2.82555	2.65711	2.89795	3.32535	4.57941	6.36483	NO	2.56532	3.95526	NO	2.74133	3.11165	NO	1.78542	2.50925983150764e-06	Up	1.01962	0.000338031	Up
352	chr9:90021347-90021419	n-Tk18|chr9_1035_tRNALys_CTT-	yes	4.6515	0	4.4737	0	5.56835	0	6.23132	0	2.10583	1.65659	3.80482	3.7948	3.14441	2.80394	2.92252	2.9617	4.5626	5.89983	NO	1.88121	3.79981	NO	2.97418	2.94211	NO	1.33723	0.000178437	Up	1.95067	3.86231585614344e-12	Up
353	chr9:104302450-104302521	n-Tc47|chr9_592_tRNACys_GCA+	yes	-0.0557647	0	-0.0360117	0	1.185	0	1.88708	0	-0.180854	0.238988	0.71515	1.2	-0.337267	-0.148837	0.621551	0.782109	-0.0458882	1.53604	YES	0.0290671	0.957577	YES	-0.243052	0.70183	YES	1.58193	2.26792263289583e-05	Up	-0.0163717	0.981267	Null
354	chr9:104306386-104306457	n-Tc53|chr9_593_tRNACys_GCA+	yes	-0.0018025	0	-0.0534756	0	0.518851	0	1.33919	0	0.230314	-0.338243	0.391502	0.66086	0.446642	0.232005	0.399348	0.590556	-0.0276391	0.929019	YES	-0.0539645	0.526181	YES	0.339323	0.494952	YES	0.956658	0.00561196	Null	0.424517	0.195555	Null
355	chr9:104310997-104311068	n-Te18|chr9_961_tRNAGlu_TTC-	yes	0.641223	0	1.07923	0	-0.0201066	0	-0.218348	0	-0.0131464	0.238988	-0.482196	-0.78194	0.0908189	0.302402	-0.275799	-0.569075	0.860224	-0.119227	YES	0.112921	-0.632068	YES	0.19661	-0.422437	YES	-0.979451	0.00292257	Down	-0.125942	0.755245	Null
356	chr9:107551368-107551823	B2_Mm2_SINE_B2-	yes	1.89011	0	2.43847	0	0.0599648	0	0.318962	0	0.406164	0.839281	-0.283626	-0.179161	0.545844	1.22627	-0.274118	-0.508317	2.16429	0.189463	NO	0.622722	-0.231394	YES	0.886059	-0.391218	YES	-1.97482	7.06767699337513e-07	Down	0.423161	0.196901	Null
357	chr9:109833765-109833864	B1_Mm_Alu_SINE-	no	1.35565	0	1.01555	0	3.42292	0	4.0237	0	0.0875142	0.092241	1.98383	2.25174	0.410298	0.312242	1.06147	1.40844	1.1856	3.72331	NO	0.0898776	2.11779	YES	0.36127	1.23495	YES	2.53771	1.64852493830396e-08	Up	1.15423	4.24983329562286e-05	Up
358	chr9:123438543-123438615	n-Tr2|chr9_783_tRNAArg_ACG-	yes	4.90604	0	4.7616	0	5.9361	0	6.26671	0	2.7071	1.87782	3.96608	4.13867	3.02548	2.92958	2.96366	3.1445	4.83382	6.10141	NO	2.29246	4.05237	NO	2.97753	3.05408	NO	1.26759	0.000197201	Up	1.68336	1.28862449033556e-09	Up
359	chr10:3718724-3718823	L1Md_A_L1_LINE-	no	1.41555	95.42	1.61231	95.07	0.0676481	84.22	0.00934256	77.6	1.45948	0.129437	0.84253	0.738257	0.472661	-0.0309275	0.752122	0.582681	1.51393	0.0384953	NO	0.794458	0.790393		0.220867	0.667401		-1.47543	2.59453121463896e-05	Down	-0.450599	0.165436	Null
360	chr10:8702849-8702948	B2_Mm2_B2_SINE+	no	1.48267	0	1.43837	0	0.856177	0	0.61574	0	0.21108	-0.0226356	0.903945	0.818521	0.573921	0.280392	0.602739	0.401131	1.46052	0.735958	NO	0.0942221	0.861233	YES	0.427156	0.501935	YES	-0.724558	0.0212301	Null	0.692233	0.0210453	Null
361	chr10:12642369-12642451	n-Tl25|chr10_1316_tRNALeu_TAA-	yes	4.24597	0	4.28801	0	5.26845	0	5.68392	0	1.89547	1.45988	3.23805	3.32836	2.13171	2.09848	2.14757	2.57871	4.26699	5.47618	NO	1.67768	3.28321	NO	2.1151	2.36314	NO	1.2092	0.000355676	Up	1.35749	1.07127728979681e-06	Up
362	chr10:19798427-19798526	B2_Mm1t_B2_SINE+	no	1.9681	0.2	1.84363	0.69	0.0333324	0	-0.40249	0	0.355657	0.532397	0.109257	-0.352122	0.678438	0.575951	-0.241289	0.112097	1.90587	-0.184579	NO	0.444027	-0.121432	YES	0.627195	-0.0645962	YES	-2.09044	2.10018590304029e-07	Down	0.126332	0.754813	Null
363	chr10:23496889-23496960	n-Tw1|chr10_1282_tRNATrp_CCA-	yes	0.43419	8.99	0.114611	9.19	-0.0875085	16.85	0.0617035	17.68	0.527026	-0.00533873	-0.0396353	-0.0345945	0.102743	-0.207794	-0.445203	-0.0982492	0.274401	-0.0129025	YES	0.260844	-0.0371149	YES	-0.0525256	-0.271726	YES	-0.287303	0.378201	Null	-0.0787579	0.849819	Null
364	chr10:30530946-30531017	n-Te9|chr10_81_tRNAGlu_CTC+	yes	4.97648	0	4.72032	0	5.51084	0	6.22916	0	2.37437	1.8853	3.68725	3.7299	3.08941	2.70081	2.55377	2.41348	4.8484	5.87	NO	2.12983	3.70858	NO	2.89511	2.48362	NO	1.0216	0.00298583	Up	1.99023	1.87395349258015e-12	Up
365	chr10:61853872-61853944	n-Ta6|chr10_1120_tRNAAla_AGC-	yes	-0.0564105	0	0.120746	0	-0.49376	0	-0.21467	0	0.188115	-0.469804	-0.619639	-0.892396	-0.340545	-0.343203	-0.639113	-0.705118	0.0321676	-0.354215	YES	-0.140845	-0.756018	YES	-0.341874	-0.672116	YES	-0.386383	0.224177	Null	-0.284931	0.414567	Null
366	chr10:62255334-62255433	B1_Mus1_Alu_SINE+	no	0.998979	0	1.23613	0	2.67685	0	3.23874	0	0.0456433	0.298941	1.08479	1.36601	-0.212126	0.2035	0.350965	0.72639	1.11756	2.95779	NO	0.172292	1.2254	YES	-0.00431316	0.538677	YES	1.84024	2.14854571890911e-06	Up	0.510116	0.107436	Null
367	chr10:62656988-62657080	n-Tm18|chr10_1101_tRNAMet_CAT_I-	yes	0.110446	0	0.127923	0	-0.663619	0	-0.492012	0	-0.475481	-0.386772	-0.648554	-0.681403	0.116501	-0.251113	-0.343071	-0.715122	0.119185	-0.577815	YES	-0.431126	-0.664978	YES	-0.0673058	-0.529097	YES	-0.697	0.0258603	Null	0.227939	0.530262	Null
368	chr10:62866100-62866281	B3_SINE_B2+	yes	3.82274	0	3.59745	0	1.75154	0	1.98021	0	1.77344	1.23835	0.674956	0.615485	2.24774	2.06218	0.101674	0.22824	3.7101	1.86587	NO	1.5059	0.645221	NO	2.15496	0.164957	NO	-1.84422	1.18839576239161e-06	Down	1.12933	6.49508103247241e-05	Up
369	chr10:62892224-62892305	n-Ts26|chr10_1095_tRNASer_TGA-	yes	4.4945	0	4.5471	0	4.94369	0	5.20631	0	2.56738	1.66649	3.1072	3.15249	3.01796	2.79434	1.88324	2.33813	4.5208	5.075	NO	2.11693	3.12985	NO	2.90615	2.11068	NO	0.554203	0.0777053	Null	1.80838	9.41768868735971e-11	Up
370	chr10:70786302-70786504	B2_Mm1a_SINE_B2-	yes	2.13739	6.48	2.3444	5.48	-0.687648	9.16	-1.22399	8.78	0.665819	0.387686	-0.963372	-1.16852	0.527557	0.938269	-0.415975	-0.891379	2.2409	-0.95582	NO	0.526753	-1.06595	YES	0.732913	-0.653677	YES	-3.19672	2.86146027524238e-10	Down	-0.206109	0.575669	Null
371	chr10:74967299-74967451	B3_SINE_B2+	yes	2.63603	0	3.06488	0	0.14185	0	0.459613	0	0.930712	0.717666	-0.111122	-0.411958	1.11978	1.27719	-0.400098	-0.317877	2.85045	0.300732	NO	0.824189	-0.26154	YES	1.19849	-0.358988	NO	-2.54972	1.00358397413273e-08	Down	0.471746	0.143025	Null
372	chr10:77846390-77846462	n-Ta5|chr10_979_tRNAAla_AGC-	yes	0.280501	0	0.0481519	0	0.227503	0	-0.344515	0	0.274708	-0.0254692	-0.668	-0.204687	0.281248	0.0017102	-0.397301	-0.10396	0.164326	-0.0585057	YES	0.124619	-0.436343	YES	0.141479	-0.25063	YES	-0.222832	0.517893	Null	-0.168853	0.66189	Null
373	chr10:79355503-79355602	B2_Mm1a_B2_SINE-	no	1.03058	1.06	1.28313	0.59	1.71622	0	2.46171	0.09	0.210385	0.21773	0.707471	0.810259	0.296458	0.240825	0.305855	0.66114	1.15685	2.08897	NO	0.214057	0.758865	YES	0.268641	0.483497	YES	0.932114	0.00652843	Null	0.329952	0.335432	Null
374	chr10:79371940-79372046	Rnu6|U6+	yes	4.2524	1.28	3.05005	1.71	5.63944	1.66	6.07511	1.84	2.38051	1.05678	3.70298	3.6197	2.41559	1.28173	2.21064	2.25287	3.65122	5.85727	NO	1.71865	3.66134	NO	1.84866	2.23176	NO	2.20605	1.152814527938e-06	Up	1.55959	1.73534533504797e-08	Up
375	chr10:79448251-79448357	Rnu6|U6+	yes	1.91008	3.82	1.91567	3.76	5.19631	3.22	5.90574	2.88	0.206079	0.443991	3.28042	3.40571	0.600545	0.571499	2.14633	2.41751	1.91287	5.55102	NO	0.325035	3.34307	YES	0.586022	2.28192	NO	3.63815	5.66301738066613e-11	Up	1.32213	2.12961413135633e-06	Up
376	chr10:79711709-79711781	n-Tf3|chr10_961_tRNAPhe_GAA-	yes	4.77809	0	5.61685	0	6.84042	0	7.15454	0	2.62089	2.86563	4.86283	4.89944	3.05529	3.78891	3.61352	3.87616	5.19747	6.99748	NO	2.74326	4.88114	NO	3.4221	3.74484	NO	1.80001	6.39157177991671e-06	Up	1.81513	8.10429548311498e-11	Up
377	chr10:79711904-79711977	n-Tn7|chr10_381_tRNAAsn_GTT+	yes	4.54866	0	5.19962	0	5.6988	0	5.99047	0	2.46846	2.44423	3.73765	3.79265	2.86152	3.34556	2.54695	2.88863	4.87414	5.84464	NO	2.45635	3.76515	NO	3.10354	2.71779	NO	0.970499	0.00424315	Up	1.69455	1.0215733170718e-09	Up
378	chr10:79786931-79787030	B1F2_Alu_SINE+_and_B2_Mm1a_B2_SINE+	no	2.42121	2.4	2.55632	2.86	2.83987	3.9	3.84265	2.61	0.562542	0.763784	1.76344	1.85052	0.806481	0.815183	1.30668	1.48326	2.48876	3.34126	NO	0.663163	1.80698	NO	0.810832	1.39497	YES	0.852498	0.0165345	Null	0.559679	0.0731803	Null
379	chr10:87292631-87292703	n-Tk21|chr10_885_tRNALys_TTT-	yes	-0.00187609	0	-0.153298	0	0.82874	0	1.03871	0	0.225562	0.313994	0.504581	0.769658	-0.297543	-0.170846	1.18829	0.393404	-0.0775869	0.933725	YES	0.269778	0.63712	YES	-0.234194	0.790845	YES	1.01131	0.00183186	Up	-0.657698	0.0296125	Null
380	chr10:90644157-90644228	n-Tw2|chr10_857_tRNATrp_CCA-	yes	4.28815	0	4.17373	0	4.89471	0	5.34383	0	2.33935	1.69774	3.11106	3.07513	2.48173	2.3822	1.96942	2.31994	4.23094	5.11927	NO	2.01855	3.0931	NO	2.43197	2.14468	NO	0.888332	0.00635854	Null	1.36184	9.89298967742923e-07	Up
381	chr10:90644842-90644913	n-Td16|chr10_856_tRNAAsp_GTC-	yes	4.53666	0	5.50437	0	5.76916	0	6.37728	0	2.23709	2.57785	3.8785	3.99303	2.5924	3.22424	2.44868	2.95022	5.02051	6.07322	NO	2.40747	3.93577	NO	2.90832	2.69945	NO	1.05271	0.00458477	Up	1.73717	4.16040235224488e-10	Up
382	chr10:92915723-92915794	n-Td8|chr10_851_tRNAAsp_GTC-	yes	4.15615	0	4.54598	0	5.17425	0	5.66069	0	2.31545	2.12625	3.21286	3.49458	2.76005	2.96851	2.42629	2.61368	4.35106	5.41747	NO	2.22085	3.35372	NO	2.86428	2.51998	NO	1.0664	0.00167209	Up	1.47716	9.57561090449053e-08	Up
383	chr10:119656419-119656518	B2_Mm1a_B2_SINE+	no	0.0691224	0	0.50037	0	2.63273	0	3.44214	0	0.0303488	0.346699	1.62299	1.38101	-0.668971	-0.0311259	0.957823	0.68291	0.284746	3.03744	NO	0.188524	1.502	YES	-0.350048	0.820366	YES	2.75269	8.8076502302783e-09	Up	0.143062	0.718304	Null
384	chr10:126508214-126508433	B3_SINE_B2-	yes	2.64897	0	2.42934	0	-0.0247262	0	0.0499268	0	1.24586	0.546047	-0.620616	-0.479081	1.2658	1.20896	-0.367066	-0.560955	2.53915	0.0126003	NO	0.895952	-0.549848	YES	1.23738	-0.46401	NO	-2.52655	7.11536068396287e-09	Down	0.255588	0.47048	Null
385	chr10:126597026-126597125	B1_Mus1_Alu_SINE-	no	1.69154	0	1.81226	0	0.205512	0	0.364735	0	0.300955	0.141094	-0.10699	0.0989185	0.694343	0.561186	0.365884	-0.0503947	1.7519	0.285124	NO	0.221024	-0.00403557	YES	0.627765	0.157745	YES	-1.46678	2.79347228450827e-05	Down	0.24496	0.49138	Null
386	chr10:127071228-127071327	B1_Mus2_Alu_SINE-	no	1.51808	0	1.34912	0	-0.2512	0	-0.200526	0	0.645452	0.0514416	-0.661457	-0.394157	0.232751	0.341056	-0.125496	-0.237512	1.4336	-0.225863	NO	0.348447	-0.527807	YES	0.286903	-0.181504	YES	-1.65946	5.06418229348313e-06	Down	-0.407847	0.215993	Null
387	chr10:127895520-127895601	n-Ts13|chr10_688_tRNASer_CGA-	yes	4.59347	0	4.61788	0	5.60662	0	5.88094	0	2.27045	2.18205	3.6417	3.67579	2.86625	2.8201	2.60228	2.78229	4.60567	5.74378	NO	2.22625	3.65874	NO	2.84318	2.69228	NO	1.13811	0.000586813	Up	1.58339	1.06407089847314e-08	Up
388	chr11:7769780-7769851	n-Td10|chr11_69_tRNAAsp_GTC+	yes	0.152296	32.26	0.194237	26.6	-0.609538	20.53	-0.73563	29.3	0.406195	-0.261804	-0.370815	-0.328737	0.0588014	-0.16442	-0.53908	-0.52116	0.173267	-0.672584	YES	0.0721953	-0.349776	YES	-0.0528092	-0.53012	YES	-0.845851	0.00746724	Null	0.0553396	0.898971	Null
389	chr11:48632044-48632116	n-Tv15|chr11_204_tRNAVal_CAC+	yes	4.79671	0	4.42991	0	6.39982	0	6.72298	0	2.36398	1.63649	4.4519	4.48679	2.85907	2.68983	3.14418	3.40939	4.61331	6.5614	NO	2.00024	4.46934	NO	2.77445	3.27678	NO	1.94809	6.81245759184946e-07	Up	1.96678	2.83971677818441e-12	Up
390	chr11:48637230-48637303	n-Tg1|chr11_205_tRNAGly_ACC+	yes	4.06092	0	3.56254	0	5.27634	0	5.91545	0	1.77071	0.949934	3.31594	3.48072	2.46388	1.93318	2.44726	2.51634	3.81173	5.59589	NO	1.36032	3.39833	NO	2.19853	2.4818	NO	1.78416	5.70776130387382e-06	Up	1.75474	2.88029316476509e-10	Up
391	chr11:48647385-48647457	n-Tk10|chr11_2023_tRNALys_CTT-	yes	4.73469	0	5.25747	0	6.29158	0	6.62564	0	2.3985	2.47352	4.49604	4.46976	2.95069	3.41186	3.08752	3.51766	4.99608	6.45861	NO	2.43601	4.4829	NO	3.18128	3.30259	NO	1.46253	5.31365320667201e-05	Up	1.92557	7.03586253523427e-12	Up
392	chr11:48647931-48648002	n-Ta38|chr11_2022_tRNAAla_TGC-	yes	5.59041	0	5.3961	0	6.30055	0	6.62612	0	3.44527	2.7924	4.53655	4.58999	3.97141	3.73203	3.29473	3.79695	5.49325	6.46333	NO	3.11883	4.56327	NO	3.85172	3.54584	NO	0.970081	0.00287873	Up	1.75032	3.15955149873576e-10	Up
393	chr11:48667121-48667193	n-Tt16|chr11_206_tRNAThr_TGT+	yes	5.17617	0	5.28361	0	6.09788	0	6.3919	0	2.75285	2.50663	4.23699	4.19841	3.31444	3.42719	3.0332	3.29429	5.22989	6.24489	NO	2.62974	4.2177	NO	3.37082	3.16374	NO	1.015	0.00184008	Up	1.79503	1.23709249952033e-10	Up
394	chr11:48669782-48669853	n-Tp14|chr11_207_tRNAPro_TGG+	yes	4.15939	0	4.61046	0	6.45158	0	7.10314	0	2.11847	2.10774	4.72584	4.61151	2.59914	2.82178	3.3102	3.38997	4.38492	6.77736	NO	2.1131	4.66868	NO	2.71046	3.35009	NO	2.39244	6.01891077796863e-08	Up	1.91594	8.18014111111313e-12	Up
395	chr11:48670139-48670211	n-Tv7|chr11_208_tRNAVal_AAC+	yes	4.69218	0	4.90984	0	6.67867	0	7.16299	0	2.59908	2.25586	4.80686	4.71945	3.16997	3.18916	3.38971	3.54387	4.80101	6.92083	NO	2.42747	4.76315	NO	3.17957	3.46679	NO	2.11982	1.9808748342065e-07	Up	2.04846	8.22451748607885e-13	Up
396	chr11:48670476-48670557	n-Tl6|chr11_2021_tRNALeu_AAG-	yes	3.59344	0	3.20091	0	5.71249	0	6.23281	0	1.37614	0.471385	3.82573	3.81236	2.17217	1.6028	2.56665	2.78476	3.39717	5.97265	NO	0.923762	3.81905	YES	1.88749	2.67571	NO	2.57547	1.14282998407092e-08	Up	2.10707	2.0313636539954e-13	Up
397	chr11:48676608-48676707	B2_Mm2_B2_SINE+	no	1.14791	0	1.03189	0	3.27737	0	3.83233	0	0.0678768	0.0241203	1.79829	1.93035	0.414648	0.595352	0.804088	1.09446	1.0899	3.55485	NO	0.0459986	1.86432	YES	0.505	0.949273	YES	2.46495	1.92284961570193e-08	Up	1.37405	7.81120528635812e-07	Up
398	chr11:48686457-48686556	B1_Mur1_Alu_SINE-	no	0.508417	0	0.795122	0	2.35877	0	3.05967	0	-0.038217	0.0749558	1.40656	1.17637	0.242491	0.00506766	0.755302	0.694977	0.65177	2.70922	NO	0.0183694	1.29146	YES	0.123779	0.725139	YES	2.05745	5.59501774126005e-07	Up	0.671734	0.0259459	Null
399	chr11:48689042-48689141	B2_Mm2_B2_SINE-_and_Lx7_L1_LINE-	no	0.717375	0	0.848886	0	2.28199	0	2.73958	0	-0.0755614	0.190316	0.283023	0.554734	0.294354	0.298492	0.372389	0.229581	0.78313	2.51078	NO	0.0573772	0.418878	YES	0.296423	0.300985	YES	1.72765	4.22243930372989e-06	Up	0.356939	0.295065	Null
400	chr11:49998672-49998771	B2_Mm2_B2_SINE+	no	1.34421	0	1.2328	0	4.79555	0	5.49542	0	0.0373162	0.163627	3.23032	3.5206	0.513984	0.159356	2.34143	2.39258	1.2885	5.14548	NO	0.100472	3.37546	YES	0.33667	2.367	NO	3.85698	2.31343069008914e-11	Up	1.24465	8.94533583227401e-06	Up
401	chr11:51790041-51790112	n-Ta1|chr11_238_tRNAAla_AGC+	yes	-0.458289	0	-0.0903304	0	-0.520013	0	-0.287395	0	-0.582242	-0.0455467	-0.412543	-0.243667	-0.546403	0.208847	-0.110665	-0.560251	-0.27431	-0.403704	YES	-0.313894	-0.328105	YES	-0.168778	-0.335458	YES	-0.129394	0.713687	Null	0.15247	0.698203	Null
402	chr11:58115679-58115750	n-Te10|chr11_1912_tRNAGlu_CTC-	yes	5.15162	0	5.22824	0	5.53823	0	5.88313	0	2.9507	2.52449	3.60822	3.79179	3.38894	3.2928	2.50912	2.90189	5.18993	5.71068	NO	2.73759	3.7	NO	3.34087	2.7055	NO	0.52075	0.0996159	Null	1.59778	7.73053538201276e-09	Up
403	chr11:58115976-58116082	n-Tl12|chr11_1911_tRNALeu_CAA_I-	yes	4.7183	0	4.83522	0	3.70858	0	3.91328	0	2.70738	2.32889	2.41507	2.69464	3.05017	3.03315	1.16253	1.30774	4.77676	3.81093	NO	2.51813	2.55486	NO	3.04166	1.23513	NO	-0.965834	0.00270589	Down	1.84325	4.3964455549538e-11	Up
404	chr11:61221418-61221489	n-Tw5|chr11_1880_tRNATrp_CCA-	yes	4.99301	0	4.92893	0	5.38178	0	5.54938	0	2.26552	1.59706	3.46531	3.512	2.77216	2.70739	2.22676	2.72892	4.96097	5.46558	NO	1.93129	3.48865	NO	2.73977	2.47784	NO	0.504612	0.105752	Null	1.8193	7.47138454721607e-11	Up
405	chr11:62559517-62559588	n-Tw8|chr11_1849_tRNATrp_CCA-	yes	1.60285	0	0.874641	0	0.0786908	0	0.549013	0	-0.19821	-0.24048	0.00117597	0.0457503	0.699112	-0.125356	-0.335986	-0.247212	1.23874	0.313852	NO	-0.219345	0.0234631	YES	0.286878	-0.291599	YES	-0.924893	0.00775056	Null	0.821284	0.00494224	Up
406	chr11:67104641-67104712	n-Tp12|chr11_372_tRNAPro_TGG+	yes	-0.16611	0	0.488759	0	0.243719	0	0.241154	0	0.139	0.413114	0.147779	-0.126449	0.0808938	0.186923	0.157067	0.249633	0.161324	0.242436	YES	0.276057	0.010665	YES	0.133909	0.20335	YES	0.0811124	0.832183	Null	-0.334833	0.329119	Null
407	chr11:68850505-68850578	n-Ti5|chr11_393_tRNAIle_AAT+	yes	4.40571	0	5.03065	0	5.76364	0	6.30768	0	2.46595	2.55472	4.01737	3.94146	3.03966	3.35832	2.78122	2.80623	4.71818	6.03566	NO	2.51034	3.97941	NO	3.19899	2.79372	NO	1.31748	0.000284177	Up	1.87434	2.22462357839775e-11	Up
408	chr11:68850979-68851060	n-Ts4|chr11_394_tRNASer_AGA+	yes	4.76924	0	4.95194	0	5.51891	0	6.02615	0	2.52832	2.48308	3.72281	3.69234	3.20936	3.265	2.36032	2.57283	4.86059	5.77253	NO	2.5057	3.70757	NO	3.23718	2.46657	NO	0.911937	0.00560424	Null	1.97248	2.77119784543793e-12	Up
409	chr11:68851355-68851428	n-Tt8|chr11_395_tRNAThr_AGT+	yes	4.54754	0	5.02449	0	6.68904	0	7.18391	0	2.11313	2.49156	4.85893	4.87323	2.54724	3.05261	3.52743	3.75466	4.78601	6.93647	NO	2.30234	4.86608	NO	2.79993	3.64105	NO	2.15046	2.31427876416478e-07	Up	1.72262	5.78894045175335e-10	Up
410	chr11:68853887-68853958	n-Tp9|chr11_396_tRNAPro_CGG+	yes	3.69273	0	4.35131	0	2.7997	0	3.36993	0	1.83018	1.7768	1.5113	1.71554	2.2785	2.77191	0.345242	0.38506	4.02202	3.08482	NO	1.80349	1.61342	NO	2.52521	0.365151	NO	-0.937203	0.00708455	Null	1.96999	2.83971677818441e-12	Up
411	chr11:68854486-68854557	n-Td9|chr11_397_tRNAAsp_GTC+	yes	5.71821	0	5.90245	0	6.69474	0	7.07159	0	3.04741	2.97999	4.7782	4.8726	3.87384	3.85375	3.49961	3.66244	5.81033	6.88316	NO	3.0137	4.8254	NO	3.86379	3.58102	NO	1.07284	0.00121311	Up	2.09448	2.31230214283083e-13	Up
412	chr11:68854780-68854851	n-Tg25|chr11_1824_tRNAGly_TCC-	yes	5.02385	0	5.30055	0	6.51191	0	6.8557	0	2.66685	2.51898	4.65528	4.66852	3.3579	3.45318	3.37781	3.49026	5.1622	6.6838	NO	2.59291	4.6619	NO	3.40554	3.43404	NO	1.52161	2.26792263289583e-05	Up	2.04049	8.67006291786834e-13	Up
413	chr11:68855328-68855399	n-Tw7|chr11_398_tRNATrp_CCA+	yes	4.4513	0	4.53806	0	6.29146	0	6.65846	0	2.53254	1.95326	4.49424	4.66387	2.82678	2.69116	3.46899	3.61228	4.49468	6.47496	NO	2.2429	4.57905	NO	2.75897	3.54064	NO	1.98027	4.28278033715216e-07	Up	1.55449	1.92041581559121e-08	Up
414	chr11:68875822-68875895	n-Ti4|chr11_1823_tRNAIle_AAT-	yes	4.69002	0	5.31013	0	6.57021	0	6.95871	0	2.41108	2.582	4.8225	4.70773	2.96641	3.37671	3.49556	3.6389	5.00008	6.76446	NO	2.49654	4.76511	NO	3.17156	3.56723	NO	1.76438	5.44516936697321e-06	Up	1.8729	2.27018448977396e-11	Up
415	chr11:68876246-68876319	n-Tt7|chr11_1822_tRNAThr_AGT-	yes	5.18318	0	5.85936	0	6.63415	0	7.04852	0	2.88363	3.07216	4.9031	4.84115	3.28454	4.09327	3.68691	3.95491	5.52127	6.84133	NO	2.97789	4.87212	NO	3.6889	3.82091	NO	1.32006	0.000257385	Up	1.76223	2.48073478545023e-10	Up
416	chr11:68876544-68876625	n-Ts17|chr11_1821_tRNASer_GCT-	yes	5.73958	0	6.00014	0	6.33577	0	6.58445	0	3.39089	3.22076	4.71088	4.67057	3.79601	4.19518	3.53788	3.85863	5.86986	6.46011	NO	3.30583	4.69072	NO	3.9956	3.69826	NO	0.590254	0.0625529	Null	1.68223	1.30476258022091e-09	Up
417	chr11:68876997-68877068	n-Tw6|chr11_1820_tRNATrp_CCA-	yes	3.25266	0	3.54318	0	4.36916	0	4.93291	0	0.799213	1.30569	2.26365	2.46228	1.26539	1.65819	1.47311	1.62127	3.39792	4.65103	NO	1.05245	2.36297	YES	1.46179	1.54719	NO	1.25311	0.000334483	Up	1.22512	1.26645610844199e-05	Up
418	chr11:68889367-68889466	B2_Mm1t_B2_SINE-_and_B1_Mur3_alu_SINE-	no	1.74993	22.27	0.974074	22.4	3.841	22.5	4.53259	24.91	-0.00180863	0.209411	2.26442	2.47689	0.747315	0.543321	1.36336	1.6644	1.362	4.18679	NO	0.103801	2.37066	YES	0.645318	1.51388	YES	2.8248	8.89799294322099e-09	Up	1.3983	4.81747430272313e-07	Up
419	chr11:68923967-68924040	n-Tt5|chr11_399_tRNAThr_AGT+	yes	3.88414	0	3.90489	0	3.21752	0	3.72533	0	1.84554	1.40625	1.47335	1.60563	2.3308	2.63914	1.28124	1.15555	3.89451	3.47142	NO	1.6259	1.53949	NO	2.48497	1.21839	NO	-0.423089	0.190623	Null	1.18016	2.81000563674084e-05	Up
420	chr11:68924421-68924502	n-Ts14|chr11_400_tRNASer_CGA+	yes	3.84072	0	3.61747	0	2.92655	0	3.63772	0	1.57514	1.1025	1.28886	1.66826	2.07741	1.7406	0.453473	0.807273	3.72909	3.28213	NO	1.33882	1.47856	NO	1.909	0.630373	NO	-0.446959	0.183359	Null	1.41837	3.22023252643805e-07	Up
421	chr11:68932296-68932366	n-Tg13|chr11_1819_tRNAGly_GCC-	yes	4.65193	0	4.94347	0	5.47678	0	5.92217	0	2.29793	2.01364	3.70721	3.76148	2.79734	2.86208	2.38714	2.54796	4.7977	5.69947	NO	2.15578	3.73435	NO	2.82971	2.46755	NO	0.901772	0.00607289	Null	1.94072	4.97421831677839e-12	Up
422	chr11:68936984-68937070	n-Tr25|chr11_1818_tRNAArg_TCT_I-	yes	3.29682	0	3.4791	0	4.92202	0	5.55596	0	1.09762	1.42364	2.93668	2.98997	1.77383	1.99697	1.90867	2.04259	3.38796	5.23899	NO	1.26063	2.96332	NO	1.8854	1.97563	NO	1.85103	2.22033409496788e-06	Up	1.61247	5.66522378252991e-09	Up
423	chr11:68937743-68937824	n-Tl29|chr11_401_tRNALeu_TAG+	yes	5.02718	0	5.56417	0	6.11068	0	6.50443	0	2.70552	2.79076	4.31108	4.30366	3.29448	3.73989	3.04417	3.26296	5.29567	6.30755	NO	2.74814	4.30737	NO	3.51718	3.15356	NO	1.01188	0.00281291	Up	1.92285	7.23056737842197e-12	Up
424	chr11:68938109-68938180	n-Tq6|chr11_1817_tRNAGln_CTG-	yes	3.7926	0	3.87638	0	6.97184	0	7.79331	0	1.419	1.59331	5.42945	5.33971	2.23333	2.36944	3.99254	3.96615	3.83449	7.38258	NO	1.50616	5.38458	NO	2.30139	3.97934	NO	3.54809	1.25135334905853e-10	Up	2.20047	1.974981842553e-14	Up
425	chr11:68938678-68938750	n-Tk27|chr11_1816_tRNALys_TTT-	yes	4.9199	0	5.11771	0	6.45475	0	6.89822	0	2.75027	2.69724	4.71846	4.50313	3.30171	3.22648	3.34	3.4435	5.0188	6.67648	NO	2.72375	4.6108	NO	3.26409	3.39175	NO	1.65768	7.46801512437925e-06	Up	1.75939	2.61121584515413e-10	Up
426	chr11:69355229-69355328	B2_Mm2_B2_SINE+_and_B2_Mm1a_B2_SINE+	no	0.402812	23.83	0.434486	16.67	2.53935	18.96	3.24621	21.05	0.330143	0.0119249	1.30747	1.26224	0.00568984	0.0857794	0.637413	0.627156	0.418649	2.89278	NO	0.171034	1.28485	YES	0.0457346	0.632285	YES	2.47413	2.61788046281034e-08	Up	0.52727	0.0946374	Null
427	chr11:73950817-73950889	n-Tk5|chr11_1752_tRNALys_CTT-	yes	-0.198404	0	-0.0475751	0	-0.247061	0	-0.497646	0	-0.109265	0.183777	-0.259599	-0.388805	-0.0904949	0.0584313	0.237335	0.139085	-0.12299	-0.372354	YES	0.0372556	-0.324202	YES	-0.0160318	0.18821	YES	-0.249364	0.445969	Null	-0.5657	0.0696654	Null
428	chr11:75160470-75160569	B2_Mm1a_B2_SINE+	no	1.53469	9.5	0.765863	8.8	1.92893	10.79	2.551	10.37	0.655215	-0.137843	0.779015	0.78649	0.762276	0.162496	0.396793	0.2194	1.15028	2.23997	NO	0.258686	0.782752	YES	0.462386	0.308096	YES	1.08969	0.00259715	Up	0.678356	0.0242858	Null
429	chr11:75237773-75237872	B1_Mur4_Alu_SINE+	no	1.23007	0	1.2938	0	0.170877	0	-0.127594	0	0.103088	0.361858	0.20233	0.27699	-0.0734532	0.459254	-0.228885	0.0526608	1.26194	0.0216413	NO	0.232473	0.23966	YES	0.1929	-0.0881123	YES	-1.2403	0.000239307	Down	0.2882	0.408626	Null
430	chr11:75257391-75257490	NA_17	no	1.42168	0	1.19935	0	-0.736637	0	-0.581393	0	0.643473	0.0619683	-0.806497	-0.495858	0.479222	0.221962	-0.434583	-0.138718	1.31051	-0.659015	NO	0.352721	-0.651178	YES	0.350592	-0.28665	YES	-1.96953	4.02537994974399e-07	Down	-0.366656	0.279124	Null
431	chr11:79518152-79518223	n-Tt12|chr11_550_tRNAThr_CGT+	yes	3.96711	0	4.51993	0	5.17522	0	5.45641	0	1.54718	1.67172	3.01748	3.30482	2.04313	2.58264	2.14126	2.47137	4.24352	5.31582	NO	1.60945	3.16115	NO	2.31288	2.30631	NO	1.0723	0.00158899	Up	1.55827	1.77926504082394e-08	Up
432	chr11:86075670-86075741	n-Tq12|chr11_630_tRNAGln_TTG+	yes	-0.207876	0	0.0317169	0	-0.484702	0	0.186219	0	-0.644376	0.0217245	-0.347146	-0.00188005	-0.42443	-0.00556123	-0.315458	-0.397719	-0.0880793	-0.149242	YES	-0.311326	-0.174513	YES	-0.214995	-0.356588	YES	-0.0611622	0.88076	Null	0.278406	0.427145	Null
433	chr11:87236521-87236620	NA_18	no	1.34544	12.81	1.71826	16.98	1.54948	5.51	1.80792	5.92	0.959437	1.01237	1.42833	1.6902	1.31664	1.62428	2.30014	2.46305	1.53185	1.6787	NO	0.985904	1.55926	YES	1.47046	2.3816	NO	0.146851	0.675139	Null	-0.337774	0.324652	Null
434	chr11:94023628-94023727	NA_19	no	1.45535	0	1.42821	0	-0.694452	0	-0.692928	0	0.361257	-0.030564	-0.704116	-0.566693	0.914227	0.0968799	-0.792579	-0.510285	1.44178	-0.69369	NO	0.165347	-0.635405	YES	0.505553	-0.651432	YES	-2.13547	9.83162125467736e-08	Down	0.356234	0.295117	Null
435	chr11:95720486-95720557	n-Tq16|chr11_1493_tRNAGln_TTG-	yes	4.44605	0	4.90717	0	5.27145	0	5.63308	0	2.24509	1.99406	3.16851	3.22635	2.69286	2.90452	2.10481	2.31271	4.67661	5.45227	NO	2.11957	3.19743	NO	2.79869	2.20876	NO	0.775657	0.0179826	Null	1.66779	1.75281138300528e-09	Up
436	chr11:97563763-97563836	n-Tn8|chr11_1446_tRNAAsn_GTT-	yes	3.93325	0	3.78913	0	5.04913	0	5.35896	0	1.87038	1.06294	3.06928	3.18605	2.20125	1.94309	2.00483	2.43523	3.86119	5.20404	NO	1.46666	3.12766	NO	2.07217	2.22003	NO	1.34285	9.77795758999119e-05	Up	1.51315	4.49972038960784e-08	Up
437	chr11:97631143-97631214	n-Tc18|chr11_1444_tRNACys_GCA-	yes	1.785	0	1.95217	0	4.57658	0	5.24464	0	0.426777	0.738647	2.84319	2.93407	0.716525	0.71126	1.88963	2.00309	1.86859	4.91061	NO	0.582712	2.88863	YES	0.713892	1.94636	NO	3.04202	8.25723208953585e-10	Up	1.07345	0.000150101	Up
438	chr11:97652293-97652392	B2_Mm1a_B2_SINE+	no	0.850228	0	0.856114	0	3.36943	0	3.89382	0	0.328369	0.520539	2.31815	2.25911	0.498163	0.614358	1.46008	1.54344	0.853171	3.63162	NO	0.424454	2.28863	YES	0.556261	1.50176	YES	2.77845	2.29634323846192e-09	Up	0.918681	0.00140646	Up
439	chr11:97658386-97658457	n-Tc56|chr11_791_tRNACys_GCA+	yes	4.80805	0	4.70952	0	6.1906	0	6.65091	0	2.55216	2.23168	4.21043	4.18642	3.20277	2.9951	3.05122	3.3159	4.75879	6.42075	NO	2.39192	4.19842	NO	3.09894	3.18356	NO	1.66197	7.05787516336809e-06	Up	1.72188	5.84209947448985e-10	Up
440	chr11:97660220-97660291	n-Tc51|chr11_1442_tRNACys_GCA-	yes	3.82125	0	3.03049	0	5.49766	0	6.1444	0	1.85347	0.983113	3.76093	3.71261	2.32173	1.53974	2.43692	2.75711	3.42587	5.82103	NO	1.41829	3.73677	NO	1.93074	2.59701	NO	2.39516	1.25828170226791e-07	Up	1.65221	2.45584348329672e-09	Up
441	chr11:97849560-97849631	n-Tc55|chr11_1433_tRNACys_GCA-	yes	4.49983	0	5.11836	0	5.29803	0	5.72316	0	2.61147	2.58298	3.44862	3.38227	2.76858	3.25687	2.2136	2.44146	4.8091	5.51059	NO	2.59722	3.41545	NO	3.01273	2.32753	NO	0.701498	0.0366207	Null	1.50342	5.54781415445089e-08	Up
442	chr11:97850237-97850308	n-Tc54|chr11_1432_tRNACys_GCA-	yes	4.76912	0	5.1975	0	6.06151	0	6.31937	0	2.45164	2.47597	4.23066	4.31841	2.92482	3.03049	3.0559	3.30952	4.98331	6.19044	NO	2.46381	4.27453	NO	2.97766	3.18271	NO	1.20714	0.000404368	Up	1.60567	6.57339000459677e-09	Up
443	chr11:97855307-97855406	B2_Mm2_B2_SINE+	no	2.9066	0	2.76158	0	3.18795	0	3.75356	0	0.771258	0.980837	1.6109	1.62258	1.67174	1.60441	1.09789	0.984863	2.83409	3.47075	NO	0.876048	1.61674	YES	1.63807	1.04138	NO	0.636663	0.0504078	Null	1.33739	1.58522004996836e-06	Up
444	chr11:100399472-100399544	n-Ts23|chr11_832_tRNASer_GGA+	yes	-0.067503	0	0.132517	0	0.0937956	0	0.342877	0	-0.118108	0.308007	0.0386334	0.0630206	0.0708684	0.161594	-0.0254771	-0.122188	0.032507	0.218336	YES	0.0949496	0.050827	YES	0.116231	-0.0738327	YES	0.185829	0.583903	Null	0.145941	0.712725	Null
445	chr11:101466556-101466655	B2_Mm1t_B2_SINE-_and_B2_Mm2_B2_SINE-	no	0.929416	2.59	0.618725	3.59	2.94659	0.76	3.72959	0.69	0.137663	-0.0892497	1.72329	1.75139	0.311732	-0.0346602	1.45208	1.40986	0.77407	3.33809	NO	0.0242066	1.73734	NO	0.138536	1.43097	YES	2.56402	2.21857073396446e-08	Up	0.420698	0.199426	Null
446	chr11:101488967-101489066	NA_20	no	1.31605	12.12	1.5492	12.33	1.35907	3.76	1.67866	4.97	1.02002	0.833792	1.3046	1.35449	0.945994	0.98644	1.92254	2.00551	1.43263	1.51887	NO	0.926906	1.32955	YES	0.966217	1.96403	NO	0.0862443	0.811394	Null	-0.59517	0.0546051	Null
447	chr11:101519634-101519733	NA_21	no	0.896787	31.82	1.28781	29.07	1.75374	18.25	1.94486	18.63	0.824887	0.89734	1.58204	1.91083	0.776573	0.92771	2.64327	2.59522	1.0923	1.8493	NO	0.861114	1.74644	YES	0.852141	2.61924	NO	0.757002	0.0183914	Null	-0.881778	0.00232213	Down
448	chr11:101859884-101859983	B2_Mm2_B2_SINE+	no	0.863425	0	0.271253	0	3.62746	0	4.23339	0	0.40592	0.00769013	2.14996	2.10136	0.0780301	-0.155198	1.22614	1.34482	0.567339	3.93043	NO	0.206805	2.12566	NO	-0.0385837	1.28548	YES	3.36309	2.75917266264789e-10	Up	0.594795	0.0546901	Null
449	chr11:102995363-102995462	NA_22	no	0.168332	0	-0.404817	0	4.41499	0	5.07098	0	-0.0389776	0.123336	2.50278	2.60447	0.00689466	-0.313657	1.7608	2.10254	-0.118242	4.74298	NO	0.0421793	2.55362	NO	-0.153381	1.93167	NO	4.86122	9.06858747460922e-13	Up	0.426396	0.193037	Null
450	chr11:106874180-106874252	n-Tr7|chr11_945_tRNAArg_CCG+	yes	4.99477	0	5.11138	0	5.11813	0	5.33129	0	2.5191	2.29456	3.33011	3.40941	2.97726	2.91108	2.08856	2.31667	5.05307	5.22471	NO	2.40683	3.36976	NO	2.94417	2.20262	NO	0.171632	0.613864	Null	1.70449	8.27332116162644e-10	Up
451	chr11:115274295-115274367	n-Tr14|chr11_1022_tRNAArg_CCT+	yes	4.67645	0	5.13203	0	6.09488	0	6.47571	0	2.25822	2.26539	4.18792	4.31928	2.82086	3.10386	2.95628	3.37003	4.90424	6.28529	NO	2.26181	4.2536	NO	2.96236	3.16315	NO	1.38105	0.000102031	Up	1.791	1.33777705742404e-10	Up
452	chr11:115274618-115274690	n-Tr12|chr11_1234_tRNAArg_CCT-	yes	4.09116	0	4.13843	0	5.27292	0	5.57182	0	1.63125	1.16775	3.27529	3.47219	1.87569	1.91248	2.0743	2.58984	4.1148	5.42237	NO	1.3995	3.37374	NO	1.89408	2.33207	NO	1.30757	0.000129428	Up	1.53625	2.74747900846299e-08	Up
453	chr11:115275093-115275165	n-Tr18|chr11_1023_tRNAArg_TCG+	yes	4.6139	0	4.93139	0	6.27886	0	6.66414	0	2.18243	2.34818	4.43892	4.39001	2.95572	3.10777	3.16371	3.26437	4.77264	6.4715	NO	2.26531	4.41447	NO	3.03174	3.21404	NO	1.69886	5.52408859352646e-06	Up	1.96686	2.83971677818441e-12	Up
454	chr11:116277293-116277365	n-Ta3|chr11_1203_tRNAAla_AGC-	yes	0.447061	0	0.20919	0	-0.71826	0	-0.746503	0	0.383137	-0.0713274	-0.768099	-0.643425	0.114179	0.253282	-0.790418	-0.798549	0.328125	-0.732381	YES	0.155905	-0.705762	YES	0.18373	-0.794483	YES	-1.06051	0.0011622	Down	0.116547	0.774073	Null
455	chr11:121825376-121825448	n-Tm1|chr11_1132_tRNAMet_CAT-	yes	-0.180728	0	0.477055	0	-0.141225	0	-0.526955	0	-0.0676024	0.667711	-0.20406	-0.531609	0.0496913	0.345778	-0.0224656	-0.0833704	0.148164	-0.33409	YES	0.300054	-0.367835	YES	0.197735	-0.052918	YES	-0.482254	0.150231	Null	-0.417236	0.203801	Null
456	chr12:12817037-12817136	NA_23	no	1.2698	0	1.45525	0	-1.65884	0	-1.08051	0	0.00312277	-0.270899	-1.3683	-1.36782	0.186465	0.101821	-1.21072	-1.48768	1.36252	-1.36968	NO	-0.133888	-1.36806	YES	0.144143	-1.3492	YES	-2.7322	3.76687463039531e-09	Down	0.259164	0.463313	Null
457	chr12:32635403-32635502	NA_24	no	1.43666	0	0.993265	0	-0.816821	0	-0.634095	0	0.654432	0.338258	-0.803567	-0.869816	0.384033	0.449678	-0.195531	-0.306959	1.21496	-0.725458	NO	0.496345	-0.836691	YES	0.416856	-0.251245	YES	-1.94042	7.06767699337513e-07	Down	-0.664936	0.0276273	Null
458	chr12:43516062-43516133	n-Te2|chr12_886_tRNAGlu_CTC-	yes	-0.0535584	0	0.109519	0	0.275123	0	0.104234	0	0.113295	0.063969	0.338578	0.14582	0.0780133	0.212895	0.308628	-0.111499	0.0279802	0.189678	YES	0.0886319	0.242199	YES	0.145454	0.0985644	YES	0.161698	0.636924	Null	0.200457	0.588996	Null
459	chr12:53704775-53704881	Rnu6|U6-	yes	3.86981	1.55	3.70682	1.52	5.70902	1.78	6.3279	1.99	1.78987	1.42577	3.67745	3.68665	1.8381	2.13403	2.38347	2.63375	3.78832	6.01846	NO	1.60782	3.68205	NO	1.98606	2.50861	NO	2.23014	1.18325652073797e-07	Up	1.55169	2.03585731316294e-08	Up
460	chr12:53705477-53705578	Rnu6|U6-	yes	3.35959	2.73	3.12018	2.2	5.74487	2.56	6.48396	2.62	1.504	0.953616	4.00487	3.97943	1.77646	1.57923	2.83975	2.96926	3.23988	6.11441	NO	1.22881	3.99215	NO	1.67784	2.90451	NO	2.87453	2.58095697488664e-09	Up	1.53668	2.73472233847285e-08	Up
461	chr12:64090857-64090956	L1Md_T_L1_LINE+	no	2.07606	94	2.09718	89.44	-0.315553	80.09	-0.225705	90.08	2.01553	0.15905	0.0173638	-0.0994945	0.34286	0.137817	0.0719748	0.0160335	2.08662	-0.270629	NO	1.08729	-0.0410653		0.240338	0.0440042		-2.35725	1.98294273220159e-08	Down	-0.93202	0.00117429	Down
462	chr12:70260298-70260551	Rn7sl|7SLRNA_srpRNA+	yes	5.05356	59.94	5.33008	60.73	5.61349	63.53	6.03052	62.97	2.74736	2.28506	3.54242	3.80934	3.26768	3.32338	2.60278	2.92549	5.19182	5.822	NO	2.51621	3.67588	NO	3.29553	2.76414	NO	0.630183	0.0500671	Null	1.69106	1.0995462630961e-09	Up
463	chr12:70462167-70462478	Rn7sl|7SLRNA_srpRNA-	yes	5.03827	45.9	5.64906	47.28	5.38601	52.76	5.81671	51.8	2.76591	2.58941	3.31908	3.61182	3.12737	3.50883	2.41727	2.71592	5.34367	5.60136	NO	2.67766	3.46545	NO	3.3181	2.56659	NO	0.257694	0.45875	Null	1.5393	2.6032339426144e-08	Up
464	chr12:72070107-72070179	n-Tk17|chr12_790_tRNALys_CTT-	yes	4.59622	0	4.5396	0	6.47584	0	7.06429	0	2.35833	2.01058	4.69457	4.67793	2.86254	2.85686	3.15638	3.65999	4.56791	6.77006	NO	2.18446	4.68625	NO	2.8597	3.40819	NO	2.20215	1.27490991265475e-07	Up	1.95331	3.68675219691131e-12	Up
465	chr12:82631757-82631856	B2_Mm1t_B2_SINE+_and_MTD_MaLR_LTR-	no	-0.047049	25.86	0.116494	19.18	3.55952	8.08	4.05902	8.12	-0.491644	-0.319473	2.04934	2.17579	-0.297799	-0.225938	1.3112	1.72876	0.0347225	3.80927	NO	-0.405558	2.11256	NO	-0.261868	1.51998	YES	3.77455	2.09084597534696e-11	Up	0.736276	0.0129906	Null
466	chr12:86493988-86494179	B3A_SINE_B2-	yes	2.77578	0	2.47385	0	1.10458	0	1.99459	0	1.12336	0.656352	0.0189977	0.400756	1.20338	0.964327	-0.345198	-0.130838	2.62482	1.54959	NO	0.889854	0.209877	YES	1.08385	-0.238018	NO	-1.07523	0.00265165	Down	0.641893	0.0349895	Null
467	chr12:112083548-112083621	n-Ti6|chr12_470_tRNAIle_AAT+	yes	4.51305	0	4.75839	0	5.59869	0	6.02597	0	2.16883	2.37475	3.43035	3.53971	2.69834	2.99618	2.46931	2.89751	4.63572	5.81233	NO	2.27179	3.48503	NO	2.84726	2.68341	NO	1.1766	0.000529081	Up	1.37709	7.37040594340292e-07	Up
468	chr13:4223394-4223466	n-Tk6|chr13_1041_tRNALys_CTT-	yes	-0.0676617	0	-0.236711	1.03	-0.311236	0	-0.876111	0	-0.540452	-0.333049	-0.596939	-0.32567	-0.0748784	0.110691	-0.576065	-0.333028	-0.152186	-0.593673	YES	-0.436751	-0.461304	YES	0.0179061	-0.454546	YES	-0.441487	0.17637	Null	0.447899	0.168494	Null
469	chr13:9833611-9833710	NA_25	no	1.3159	95.38	1.47626	95.22	0.699444	95.22	0.9876	96.12	0.224511	-0.181498	-0.0468427	0.767737	0.147203	-0.120269	1.30614	1.13792	1.39608	0.843522	NO	0.0215064	0.360447		0.0134671	1.22203		-0.552557	0.0799554	Null	-0.869623	0.00270546	Down
470	chr13:21252654-21252725	n-Te11|chr13_1001_tRNAGlu_CTC-	yes	4.58296	0	5.16775	0	5.30504	0	5.71109	0	2.1866	2.33796	3.79448	3.79744	2.51647	3.04167	2.21434	2.3236	4.87536	5.50806	NO	2.26228	3.79596	NO	2.77907	2.26897	NO	0.632708	0.0571175	Null	2.04378	8.58538843068967e-13	Up
471	chr13:21253274-21253346	n-Tf4|chr13_60_tRNAPhe_GAA+	yes	3.95111	0	4.31927	0	4.35818	0	4.94026	0	1.80911	1.74071	3.26004	2.93155	1.98731	2.40657	1.92295	2.16307	4.13519	4.64922	NO	1.77491	3.0958	NO	2.19694	2.04301	NO	0.51403	0.120091	Null	1.47482	1.00317496531853e-07	Up
472	chr13:21259473-21259545	n-Tm14|chr13_61_tRNAMet_CAT+	yes	3.57771	0	3.55343	0	5.99032	0	6.72256	0	1.3262	1.00367	4.14969	4.29684	1.88178	2.0043	3.00448	3.23261	3.56557	6.35644	NO	1.16493	4.22327	YES	1.94304	3.11855	NO	2.79087	3.76687463039531e-09	Up	1.88283	1.87269540521185e-11	Up
473	chr13:21259944-21260016	n-Tk28|chr13_1000_tRNALys_TTT-	yes	4.24257	0	4.57363	0	0	0	0	0	1.88693	1.93744	0	0.0591039	2.54243	2.52364	0.0597632	0	4.4081	0	NO	1.91219	0.0295519	NO	2.53304	0.0298816	NO	-4.4081	9.06858747460922e-13	Down	0.620522	0.0429699	Null
474	chr13:21261556-21261628	n-Tm15|chr13_999_tRNAMet_CAT-	yes	4.96927	0	4.91816	0	2.45757	0	3.01109	0	2.77031	2.12939	1.94678	1.66595	3.15667	2.66279	1.04241	0.558513	4.94371	2.73433	NO	2.44985	1.80637	NO	2.90973	0.80046	NO	-2.20938	1.11197053168368e-07	Down	1.46579	1.2043917004964e-07	Up
475	chr13:21261905-21261986	n-Tl7|chr13_62_tRNALeu_AAG+	yes	4.96593	0	4.7437	0	5.28952	0	5.80702	0	2.88056	2.18307	3.6721	3.81596	3.28515	3.10104	2.63724	2.74665	4.85482	5.54827	NO	2.53182	3.74403	NO	3.1931	2.69195	NO	0.693452	0.0332355	Null	1.71336	6.97954428715103e-10	Up
476	chr13:21262075-21262156	n-Tl5|chr13_63_tRNALeu_AAG+	yes	4.86488	0	4.67242	0	5.3107	0	5.80702	0	2.75027	2.04704	3.50002	3.72772	3.24724	3.08808	2.63115	2.75911	4.76865	5.55886	NO	2.39866	3.61387	NO	3.16766	2.69513	NO	0.790212	0.0151813	Null	1.68775	1.17334208742101e-09	Up
477	chr13:21264220-21264291	n-Tq7|chr13_64_tRNAGln_CTG+	yes	4.38914	0	4.27934	0	4.5691	0	5.08668	0	2.21707	1.67797	2.63768	2.82754	2.89905	2.36713	1.44846	1.79816	4.33424	4.82789	NO	1.94752	2.73261	NO	2.63309	1.62331	NO	0.493654	0.125567	Null	1.79487	1.23709249952033e-10	Up
478	chr13:21264706-21264811	n-Tl9|chr13_998_tRNALeu_CAA_I-	yes	3.69287	0	3.54821	0	5.72555	0	6.32611	0	1.38667	0.907407	3.72269	3.86265	1.99229	1.68699	2.69431	2.85649	3.62054	6.02583	NO	1.14704	3.79267	YES	1.83964	2.7754	NO	2.40529	3.28423770301981e-08	Up	1.70986	7.35712307413747e-10	Up
479	chr13:21292073-21292177	n-Tl10|chr13_65_tRNALeu_CAA_I+	yes	4.95501	0	5.77672	0	4.96003	0	5.33662	0	2.57256	2.57887	3.4002	3.50936	3.19644	3.74462	2.28211	2.49919	5.36587	5.14832	NO	2.57571	3.45478	NO	3.47053	2.39065	NO	-0.217544	0.555345	Null	1.95895	3.33250544525756e-12	Up
480	chr13:21307327-21307399	n-Tr9|chr13_997_tRNAArg_CCG-	yes	4.09551	0	4.24854	0	4.94737	0	5.51957	0	1.39876	1.14823	3.11364	3.35453	2.21819	2.24891	2.04997	2.42304	4.17202	5.23347	NO	1.2735	3.23408	NO	2.23355	2.23651	NO	1.06145	0.00167209	Up	1.95763	3.35739532083293e-12	Up
481	chr13:21314455-21314526	n-Ta16|chr13_66_tRNAAla_AGC+	yes	4.40756	0	4.86484	0	4.50472	0	4.85484	0	2.1902	2.17856	2.93999	3.20101	2.53208	3.12164	1.88992	2.31016	4.6362	4.67978	NO	2.18438	3.0705	NO	2.82686	2.10004	NO	0.0435755	0.910138	Null	1.61294	5.63742340483829e-09	Up
482	chr13:21325914-21325985	n-Ta17|chr13_67_tRNAAla_AGC+	yes	4.8756	0	4.89003	0	3.35561	0	3.63801	0	2.68242	2.45956	2.16262	2.62889	3.08848	3.11589	1.31052	2.05147	4.88281	3.49681	NO	2.57099	2.39575	NO	3.10219	1.68099	NO	-1.386	6.23259075147639e-05	Down	1.24595	8.76445387966552e-06	Up
483	chr13:21332814-21332885	n-Ta40|chr13_68_tRNAAla_TGC+	yes	3.10294	0	2.45386	0	5.45178	0	6.29863	0	1.07784	0.83805	3.68812	3.85927	1.3528	1.03798	2.68974	2.56142	2.7784	5.87521	NO	0.957945	3.77369	YES	1.19539	2.62558	NO	3.09681	2.10841146436399e-09	Up	1.38556	6.24646786818281e-07	Up
484	chr13:21334439-21334510	n-Ta18|chr13_69_tRNAAla_AGC+	yes	1.83026	0	0.669122	0	1.57648	0	1.80119	0	0.421877	-0.144457	0.440377	0.294723	0.4756	-0.127277	0.271488	0.13243	1.24969	1.68884	NO	0.13871	0.36755	YES	0.174162	0.201959	YES	0.439144	0.235675	Null	0.201042	0.587952	Null
485	chr13:21341063-21341136	n-Tt3|chr13_996_tRNAThr_AGT-	yes	1.50286	0	1.37944	0	2.24248	0	2.65575	0	0.363734	0.78337	0.837005	1.233	0.269027	0.922965	0.656374	0.355452	1.44115	2.44911	NO	0.573552	1.035	YES	0.595996	0.505913	YES	1.00796	0.0022001	Up	0.551533	0.078075	Null
486	chr13:21346089-21346160	n-Ta28|chr13_70_tRNAAla_CGC+	yes	2.20433	0	1.72266	0	-0.145307	0	-0.0816712	0	0.259743	-0.196265	-0.262409	-0.29669	0.985528	0.468785	-0.0790319	-0.233321	1.9635	-0.113489	NO	0.031739	-0.27955	YES	0.727156	-0.156177	YES	-2.07699	2.4277750596858e-07	Down	0.572044	0.0660856	Null
487	chr13:21351637-21351708	n-Ta19|chr13_71_tRNAAla_AGC+	yes	3.72555	0	2.67433	0	0	0	0	0	1.53693	0.040141	0	0.0591039	1.60512	0.737256	0	0	3.19994	0	NO	0.788538	0.0295519	YES	1.17119	0	NO	-3.19994	1.13705952527243e-09	Down	0.412204	0.21035	Null
488	chr13:21356449-21356522	n-Tt11|chr13_72_tRNAThr_CGT+	yes	2.03968	0	2.12693	0	0.789917	0	1.23703	0	0.472697	0.6302	0.306802	0.450995	0.599939	0.910431	0.206559	0.0214532	2.0833	1.01348	NO	0.551449	0.378899	YES	0.755185	0.114006	YES	-1.06983	0.00129824	Down	0.468629	0.145463	Null
489	chr13:21360338-21360409	n-Tq13|chr13_995_tRNAGln_TTG-	yes	0.90046	0	1.08108	0	1.94281	0	2.31435	0	0.150445	0.20144	0.431725	0.684105	0.320976	-0.103784	-0.0898345	0.204934	0.990769	2.12858	NO	0.175943	0.557915	YES	0.108596	0.0575496	YES	1.13781	0.000668969	Up	0.433019	0.186133	Null
490	chr13:21367825-21367898	n-Tt18|chr13_73_tRNAThr_TGT+	yes	1.43114	0	0.931669	0	3.15101	0	3.76868	0	0.329851	0.418292	1.67137	1.31076	0.280285	0.11698	0.979121	1.36824	1.1814	3.45985	NO	0.374072	1.49107	YES	0.198633	1.17368	YES	2.27844	1.28949748218783e-07	Up	0.14195	0.718304	Null
491	chr13:21371565-21371637	n-Tr16|chr13_74_tRNAArg_TCG+	yes	2.75012	0	1.94038	0	5.92972	0	6.54617	0	0.843811	0.328378	3.87402	3.9715	1.13803	0.655968	2.89636	3.07737	2.34525	6.23795	NO	0.586094	3.92276	YES	0.897002	2.98686	NO	3.89269	5.33730136633132e-11	Up	1.2468	8.66039731975021e-06	Up
492	chr13:21414682-21414755	n-Tt13|chr13_75_tRNAThr_CGT+	yes	2.15697	0	1.902	0	4.20395	0	4.92762	0	0.440101	0.553117	2.54147	2.64867	0.530339	1.1175	1.21043	1.60828	2.02949	4.56578	NO	0.496609	2.59507	YES	0.82392	1.40936	YES	2.5363	2.09409366476233e-08	Up	1.51303	4.49972038960784e-08	Up
493	chr13:21418586-21418658	n-Tm13|chr13_994_tRNAMet_CAT-	yes	3.89938	0	4.08617	0	4.12793	0	4.66185	0	1.83866	1.41854	2.50589	2.4652	2.22433	2.01609	1.62402	1.52885	3.99278	4.39489	NO	1.6286	2.48555	NO	2.12021	1.57643	NO	0.402111	0.218845	Null	1.40073	4.6001166459018e-07	Up
494	chr13:21584714-21584795	n-Ts16|chr13_992_tRNASer_GCT-	yes	-0.809491	0	-0.18048	0	1.70089	0	2.0617	0	-0.61793	-0.266005	1.05397	0.179929	-0.507263	-0.000247907	0.555828	0.496584	-0.494985	1.8813	NO	-0.441967	0.616949	YES	-0.253756	0.526206	YES	2.37628	5.53151213295259e-08	Up	0.278955	0.426321	Null
495	chr13:21802449-21802519	n-Tg28|chr13_77_tRNAGly_GCC+	yes	4.29799	0	4.66825	0	3.72738	0	4.86485	0	2.15099	2.16996	3.12434	2.87116	2.7518	2.74389	1.04775	1.27571	4.48312	4.29611	NO	2.16048	2.99775	NO	2.74785	1.16173	NO	-0.187006	0.643017	Null	2.42339	2.52018594684225e-17	Up
496	chr13:21802863-21802934	n-Tm7|chr13_78_tRNAMetInit_CAT+	yes	4.49277	0	5.3895	0	4.44186	0	5.07891	0	2.33558	2.22593	3.07081	2.91659	2.67442	3.37674	1.59434	1.30383	4.94114	4.76039	NO	2.28076	2.9937	NO	3.02558	1.44908	NO	-0.180753	0.645985	Null	2.28944	1.50910637336784e-15	Up
497	chr13:21887668-21887750	n-Tsta1|chr13_79_tRNASup_TTA+	yes	0.0722272	7.89	0.136408	10.89	0.836242	0	0.900668	0	-0.0494615	0.0152058	0.553943	0.322979	-0.0262759	-0.00762164	0	0.180019	0.104317	0.868455	YES	-0.0171279	0.438461	YES	-0.0169488	0.0900096	YES	0.764138	0.0148098	Null	0.348631	0.306371	Null
498	chr13:21939891-21939973	n-Tl24|chr13_991_tRNALeu_TAA-	yes	2.17984	1.01	2.24479	2.33	0.044626	0	0	0	0.407087	0.664023	0	0	0.92742	1.09941	0	0	2.21232	0.022313	NO	0.535555	0	YES	1.01342	0	YES	-2.19	6.66142417476566e-08	Down	0.477861	0.137102	Null
499	chr13:21947189-21947262	n-Ti11|chr13_990_tRNAIle_AAT-	yes	4.44385	0	4.57126	0	5.41088	0	5.98482	0	2.26101	1.98361	3.40837	3.42143	2.52054	2.71463	2.17775	2.6662	4.50756	5.69785	NO	2.12231	3.4149	NO	2.61758	2.42198	NO	1.19029	0.000537191	Up	1.48819	7.66092230047688e-08	Up
500	chr13:21947890-21947963	n-Tt4|chr13_81_tRNAThr_AGT+	yes	3.21365	0	3.65602	0	5.88391	0	6.53631	0	1.06726	1.38779	4.05355	3.96325	1.53266	1.73967	2.63653	2.90607	3.43483	6.21011	NO	1.22752	4.0084	NO	1.63617	2.7713	NO	2.77527	5.05353392648135e-09	Up	1.64574	2.7948940251352e-09	Up
501	chr13:21973902-21973975	n-Ti10|chr13_989_tRNAIle_AAT-	yes	3.67299	0	4.04278	0	2.61798	0	2.94986	0	1.73659	1.70272	2.19071	2.35407	2.26696	2.63827	1.33169	1.63608	3.85789	2.78392	NO	1.71965	2.27239	NO	2.45262	1.48388	NO	-1.07397	0.00131411	Down	1.52147	3.79822640850773e-08	Up
502	chr13:21974754-21974826	n-Tf1|chr13_988_tRNAPhe_GAA-	yes	3.80556	0	3.94788	0	0	0	0	0	1.42439	1.57137	0	0.0591039	2.30309	2.25186	0	0	3.87672	0	NO	1.49788	0.0295519	NO	2.27748	0	NO	-3.87672	7.79043904729853e-12	Down	0.809152	0.00568945	Null
503	chr13:21988807-21988900	n-Ti14|chr13_987_tRNAIle_TAT_I-	yes	0.716251	0	0.800207	0	0.967555	0	1.67363	0	-0.0353394	-0.376529	0.0633792	-0.0781432	-0.0255714	-0.0954144	-0.206047	-0.255114	0.758229	1.32059	YES	-0.205934	-0.00738201	YES	-0.0604929	-0.230581	YES	0.562363	0.0907877	Null	0.36864	0.276549	Null
504	chr13:21998980-21999051	n-Tm2|chr13_82_tRNAMet_CAT+	yes	2.04326	0	0.437336	0	0.425487	0	0.649753	0	0.862395	0.0135887	0.253758	0.0610008	0.61656	0.00124022	-0.110835	-0.144923	1.2403	0.53762	NO	0.437992	0.157379	YES	0.3089	-0.127879	YES	-0.702677	0.0875378	Null	0.156167	0.688775	Null
505	chr13:21999809-21999881	n-Tk23|chr13_83_tRNALys_TTT+	yes	2.16287	0	1.09107	0	3.52565	0	4.1852	0	0.595946	0.21844	2.09987	1.9442	0.770791	0.569657	0.563217	1.09447	1.62697	3.85543	NO	0.407193	2.02203	YES	0.670224	0.828845	YES	2.22846	9.05594530632433e-07	Up	1.45622	1.46815364526248e-07	Up
506	chr13:22003182-22003253	n-Td11|chr13_84_tRNAAsp_GTC+	yes	1.47132	0	1.26159	0	0.632887	0	1.14849	0	0.181071	0.047488	0.470644	0.275357	0.656643	0.480611	0.445576	-0.0419068	1.36645	0.890688	NO	0.11428	0.373	YES	0.568627	0.201834	YES	-0.475763	0.141999	Null	0.625513	0.0409895	Null
507	chr13:22006707-22006812	n-Tl11|chr13_85_tRNALeu_CAA_I+	yes	2.65188	0	1.45413	0	6.14615	0	6.68562	0	0.665755	-0.0305732	4.24105	4.411	1.26246	0.367299	3.26791	3.25679	2.05301	6.41588	NO	0.317591	4.32602	YES	0.814881	3.26235	NO	4.36288	2.56573820686917e-11	Up	1.56097	1.69066196372222e-08	Up
508	chr13:22009031-22009116	n-Tr23|chr13_985_tRNAArg_TCT_I-	yes	2.0636	0	1.25945	0	5.24246	0	5.91789	0	0.908669	0.0585201	3.41385	3.61873	0.807719	0.195939	2.53114	2.79117	1.66152	5.58017	NO	0.483594	3.51629	YES	0.501829	2.66115	NO	3.91865	5.33730136633132e-11	Up	0.873371	0.00259196	Up
509	chr13:22011084-22011165	n-Ts5|chr13_86_tRNASer_AGA+	yes	3.73378	0	4.20533	0	4.63113	0	5.32059	0	1.57539	1.53468	2.734	2.90985	2.15504	2.63454	1.65349	2.13416	3.96955	4.97586	NO	1.55504	2.82192	NO	2.39479	1.89383	NO	1.00631	0.00380317	Up	1.76785	2.16948112858025e-10	Up
510	chr13:22012069-22012140	n-Tq10|chr13_87_tRNAGln_CTG+	yes	3.18414	0	3.26447	0	3.61999	0	4.40747	0	1.26025	0.598308	2.19786	2.35905	1.71252	1.97286	1.50842	1.43007	3.2243	4.01373	NO	0.929277	2.27845	YES	1.84269	1.46925	NO	0.789425	0.0198972	Null	1.72262	5.78894045175335e-10	Up
511	chr13:22016804-22016885	n-Ts25|chr13_984_tRNASer_TGA-	yes	1.87088	0	1.45156	0	1.33026	0	2.04809	0	0.22222	-0.263476	0.46582	0.788721	0.339136	0.14622	0.206559	0.891633	1.66122	1.68918	NO	-0.020628	0.62727	YES	0.242678	0.549096	YES	0.0279604	0.947131	Null	0.34148	0.317725	Null
512	chr13:22019726-22019807	n-Ts6|chr13_88_tRNASer_AGA+	yes	1.33957	0	0.826986	0	2.09437	0	2.6883	0	0.585958	0.090996	0.511838	0.855187	0.882233	-0.0557092	0.171246	0.300491	1.08328	2.39133	NO	0.338477	0.683512	YES	0.413262	0.235869	YES	1.30806	0.000280254	Up	0.522428	0.0979144	Null
513	chr13:22023038-22023109	n-Tm10|chr13_983_tRNAMetInit_CAT-	yes	0.977877	0	0.901305	0	3.18191	0	4.06587	0	0.0876125	0.380497	2.06305	1.82441	0.126596	0.307314	0.833323	1.23663	0.939591	3.62389	NO	0.234055	1.94373	YES	0.216955	1.03498	YES	2.6843	1.19535900037611e-08	Up	0.891653	0.0020307	Up
514	chr13:22025830-22025901	n-Tq8|chr13_982_tRNAGln_CTG-	yes	2.11302	0	1.33711	0	3.95402	0	4.41855	0	0.183757	0.33758	2.48675	2.35301	0.509896	0.319269	1.04201	1.23658	1.72507	4.18629	NO	0.260668	2.41988	YES	0.414583	1.13929	YES	2.46122	5.53151213295259e-08	Up	1.4345	2.32951905141056e-07	Up
515	chr13:22027366-22027437	n-Td13|chr13_981_tRNAAsp_GTC-	yes	2.59521	0	2.17788	0	1.92448	0	2.98831	0	0.303661	0.358389	1.38122	1.5059	0.809589	0.679647	0.508881	0.572692	2.38655	2.4564	NO	0.331025	1.44356	YES	0.744618	0.540787	YES	0.0698501	0.876234	Null	1.31637	2.36650463494281e-06	Up
516	chr13:22028963-22029044	n-Ts10|chr13_980_tRNASer_AGA-	yes	3.68133	0	3.06543	0	5.12198	0	5.72438	0	1.29875	0.746381	3.16268	3.25563	2.02821	1.5315	2.15459	2.56104	3.37338	5.42318	NO	1.02257	3.20916	YES	1.77986	2.35782	NO	2.0498	8.16162957214612e-07	Up	1.60863	6.16722346732347e-09	Up
517	chr13:22032188-22032259	n-Td12|chr13_979_tRNAAsp_GTC-	yes	3.93303	0	4.35951	0	4.33804	0	5.23167	0	1.7795	1.58259	2.93602	2.98878	2.04884	2.19441	1.84428	1.78534	4.14627	4.78486	NO	1.68104	2.9624	NO	2.12162	1.81481	NO	0.638584	0.0692112	Null	1.58817	9.57038409620497e-09	Up
518	chr13:22032783-22032864	n-Ts8|chr13_978_tRNASer_AGA-	yes	3.48562	0	4.03269	0	5.7828	0	6.44499	0	1.88178	1.92789	3.84698	4.00249	2.14291	2.45844	2.95703	2.92418	3.75916	6.11389	NO	1.90484	3.92473	NO	2.30067	2.94061	NO	2.35474	9.50724623626491e-08	Up	1.37996	6.97891014578787e-07	Up
519	chr13:22063657-22063729	n-Tk22|chr13_89_tRNALys_TTT+	yes	1.67485	0	1.65523	0	0.70338	0	0.900668	0	0.514316	0.724141	0.341965	0.223143	0.901809	0.803996	0.0597632	0.0625357	1.66504	0.802024	NO	0.619228	0.282554	YES	0.852902	0.0611494	YES	-0.863015	0.00658267	Null	0.455078	0.160075	Null
520	chr13:22066901-22066972	n-Tm8|chr13_90_tRNAMetInit_CAT+	yes	5.04449	0	5.85395	0	0.0879129	0	0.162953	0	2.8286	3.00031	0	0.37042	3.24574	3.80273	0	0	5.44922	0.125433	NO	2.91446	0.18521	NO	3.52423	0	NO	-5.32379	3.45560746219277e-13	Down	0.794985	0.00672544	Null
521	chr13:22086059-22086140	n-Ts22|chr13_976_tRNASer_GCT-	yes	2.19873	0	1.87072	0	1.28723	0	1.52366	0	0.606736	0.0542653	0.297362	0.647261	1.14191	0.598526	0.42338	-0.0414974	2.03472	1.40545	NO	0.330501	0.472311	YES	0.870217	0.190941	YES	-0.629277	0.0478321	Null	0.821086	0.00494224	Up
522	chr13:22088450-22088521	n-Tq1|chr13_975_tRNAGln_CTG-	yes	1.83394	0	1.93452	0	0.525889	0	0.648915	0	0.563281	0.309575	0.093385	0.223143	0.859513	0.486764	0.117149	0.0625357	1.88423	0.587402	NO	0.436428	0.158264	YES	0.673138	0.0898423	YES	-1.29683	0.000128358	Down	0.305132	0.37659	Null
523	chr13:22107660-22107732	n-Tv3|chr13_974_tRNAVal_AAC-	yes	4.09193	0	4.19601	0	2.73558	0	3.23991	0	2.23801	1.63618	1.34609	1.01775	2.32698	2.59735	0.698767	0.483714	4.14397	2.98775	NO	1.9371	1.18192	NO	2.46217	0.591241	NO	-1.15622	0.000647655	Down	1.11575	8.06133254366679e-05	Up
524	chr13:22113013-22113085	n-Tr1|chr13_973_tRNAArg_ACG-	yes	4.6214	0	4.99727	0	3.39492	0	3.83219	0	2.30712	2.53244	2.12993	2.04837	3.12309	3.2358	1.23476	0.845906	4.80933	3.61356	NO	2.41978	2.08915	NO	3.17944	1.04034	NO	-1.19578	0.000506179	Down	1.80848	9.41768868735971e-11	Up
525	chr13:22114288-22114369	n-Ts12|chr13_972_tRNASer_CGA-	yes	4.63749	0	4.3913	0	4.83102	0	5.2563	0	2.76462	2.28978	3.13323	3.2293	3.38879	2.94607	2.06692	2.21145	4.5144	5.04366	NO	2.5272	3.18127	NO	3.16743	2.13918	NO	0.529265	0.0996004	Null	1.68231	1.30476258022091e-09	Up
526	chr13:22118417-22118489	n-Tv16|chr13_91_tRNAVal_CAC+	yes	3.40686	0	3.66756	0	4.01924	0	4.68017	0	1.85356	1.4438	2.58802	2.66468	1.87476	1.78659	1.29009	1.45855	3.53721	4.3497	NO	1.64868	2.62635	NO	1.83067	1.37432	NO	0.812491	0.0152147	Null	1.43402	2.34273002498785e-07	Up
527	chr13:22121092-22121165	n-Ti7|chr13_92_tRNAIle_AAT+	yes	4.62963	0	4.70041	0	5.57465	0	5.97299	0	2.23981	2.01034	3.6274	3.64653	2.87753	2.84664	2.53504	2.85416	4.66502	5.77382	NO	2.12508	3.63697	NO	2.86208	2.6946	NO	1.10881	0.000871064	Up	1.67937	1.34824487957311e-09	Up
528	chr13:22121969-22122042	n-Tt1|chr13_971_tRNAThr_AGT-	yes	1.05821	0	0.479358	0	3.17485	0	3.80899	0	0.394394	0.23293	1.83333	1.64829	0.430234	0.102041	0.842525	0.980871	0.768783	3.49192	NO	0.313662	1.74081	NO	0.266137	0.911698	YES	2.72314	8.65169712729316e-09	Up	0.781587	0.0078345	Null
529	chr13:22142555-22142636	n-Ts19|chr13_970_tRNASer_GCT-	yes	4.23205	0	4.34041	0	4.71844	0	4.98772	0	1.63197	1.45248	3.35707	3.50103	2.22505	2.42312	2.39992	2.42424	4.28623	4.85308	NO	1.54222	3.42905	NO	2.32409	2.41208	NO	0.566853	0.0715518	Null	1.79884	1.16202894129286e-10	Up
530	chr13:23362290-23362385	n-Ti15|chr13_969_tRNAIle_TAT_I-	yes	0.438155	0	0.407321	0	-0.194049	0	0.0612005	0	-0.288046	0.0924561	-0.220161	-0.38408	-0.00733789	-0.0982176	-0.270845	-0.380648	0.422738	-0.066424	YES	-0.0977948	-0.302121	YES	-0.0527778	-0.325746	YES	-0.489162	0.118336	Null	0.0686428	0.872049	Null
531	chr13:23377270-23377342	n-Tv4|chr13_93_tRNAVal_AAC+	yes	2.71682	0	2.46429	0	0.617362	0	0.410162	0	0.466336	1.20724	0.553943	0	1.16669	1.32322	0.374135	0.235358	2.59056	0.513762	NO	0.83679	0.276972	YES	1.24496	0.304746	NO	-2.0768	1.87935119485154e-07	Down	0.380392	0.257481	Null
532	chr13:23377518-23377590	n-Ta10|chr13_94_tRNAAla_AGC+	yes	2.74893	0	2.494	0	0.823458	0	0.510231	0	0.514337	0.968686	-0.017528	0.11223	1.19953	1.12387	0.30955	0.177739	2.62147	0.666844	NO	0.741511	0.047351	YES	1.1617	0.243644	NO	-1.95462	5.45210582413749e-07	Down	0.223896	0.540615	Null
533	chr13:23390650-23390722	n-Tv6|chr13_95_tRNAVal_AAC+	yes	2.85661	0	1.79377	0	0.783704	0	1.04886	0	1.09471	0.00865135	0.382378	-0.653968	1.16426	0.901987	0.0325644	-0.0980368	2.32519	0.916284	NO	0.551681	-0.135795	YES	1.03312	-0.0327362	YES	-1.40891	0.000256528	Down	0.378384	0.260828	Null
534	chr13:23390930-23391002	n-Ta11|chr13_96_tRNAAla_AGC+	yes	2.27087	0	1.44316	0	0.161835	0	0.0329319	0	0.5015	0.151295	-0.636646	-1.17006	0.658672	0.61672	-0.57716	-0.589771	1.85702	0.0973834	NO	0.326397	-0.903351	YES	0.637696	-0.583465	YES	-1.75963	7.3742680625339e-06	Down	-0.00858751	0.990271	Null
535	chr13:23391991-23392063	n-Tv12|chr13_97_tRNAVal_CAC+	yes	3.22628	0	2.30756	0	-0.175597	0	-0.374592	0	1.03922	0.498808	-0.615207	-0.605052	1.49822	0.78199	-0.706637	-0.698957	2.76692	-0.275094	NO	0.769015	-0.61013	YES	1.1401	-0.702797	NO	-3.04201	1.75253029019566e-09	Down	0.463755	0.150659	Null
536	chr13:23399498-23399570	n-Tv19|chr13_98_tRNAVal_CAC+	yes	2.18977	0	1.26273	0	0.854276	0	0.969337	0	0.441147	0.176493	-0.499447	-0.25264	0.596421	0.278571	-0.0973994	0.0363478	1.72625	0.911807	NO	0.30882	-0.376044	YES	0.437496	-0.0305258	YES	-0.814441	0.0197765	Null	-0.216842	0.557147	Null
537	chr13:23400921-23400994	n-Ti9|chr13_968_tRNAIle_AAT-	yes	3.23059	0.68	2.02488	0.86	0.197961	100	0.418167	80	1.16304	-0.0607133	-0.412033	-0.308353	1.48435	0.346681	-0.475227	-0.382945	2.62774	0.308064	NO	0.551164	-0.360193	YES	0.915515	-0.429086	YES	-2.31967	4.28278033715216e-07	Down	0.433244	0.186128	Null
538	chr13:23409335-23409407	n-Tm12|chr13_99_tRNAMet_CAT+	yes	2.24388	0	1.07123	0	0	0	0.042496	0	0.846164	-0.318091	0	0	0.921456	0.0869676	0.0597632	0.122473	1.65756	0.021248	NO	0.264036	0	YES	0.504212	0.0911181	YES	-1.63631	5.37549688811846e-05	Down	0.149057	0.705128	Null
539	chr13:23488929-23489002	n-Ti3|chr13_100_tRNAIle_AAT+	yes	1.60381	1.38	0.965888	0.5	2.97666	4.4	3.66976	3.03	-0.135864	0.461502	1.60909	1.48084	0.440475	0.456581	0.693587	0.492395	1.28485	3.32321	NO	0.162819	1.54496	YES	0.448528	0.592991	YES	2.03836	1.15734338444098e-06	Up	1.23768	1.00704149170357e-05	Up
540	chr13:23492664-23492736	n-Ta12|chr13_966_tRNAAla_AGC-	yes	2.36141	0	1.96774	0	2.1497	0	2.39005	0	0.450642	0.153731	0.853513	0.745245	0.768491	0.637614	0.135262	0.0641665	2.16457	2.26987	NO	0.302186	0.799379	YES	0.703053	0.0997143	YES	0.1053	0.768717	Null	1.10053	9.97182758157111e-05	Up
541	chr13:23492942-23493014	n-Tv2|chr13_965_tRNAVal_AAC-	yes	1.58804	0	1.11039	0	0.351691	0	0.372493	0	0.425769	-0.0540932	0.244346	0.127601	0.83558	-0.0206577	-0.189548	-0.546382	1.34921	0.362092	NO	0.185838	0.185974	YES	0.407461	-0.367965	YES	-0.987119	0.00274285	Down	0.775562	0.00837888	Null
542	chr13:23503946-23504018	n-Tv10|chr13_964_tRNAVal_CAC-	yes	0.174428	0	0.374862	0	0.257882	0	0.491371	0	-0.399841	-0.0514253	0.324562	0.0228113	0.213649	-0.463482	0.213119	-0.368167	0.274645	0.374627	YES	-0.225633	0.173687	YES	-0.124916	-0.0775242	YES	0.0999821	0.77807	Null	0.351928	0.302157	Null
543	chr13:23504810-23504882	n-Ta7|chr13_963_tRNAAla_AGC-	yes	2.17036	0	1.34471	0	2.52116	0	3.6609	0	0.194416	0.22344	1.45471	1.6023	0.821228	-0.048963	0.593167	0.657769	1.75753	3.09103	NO	0.208928	1.5285	YES	0.386132	0.625468	YES	1.3335	0.00101897	Up	1.08024	0.000135577	Up
544	chr13:23505117-23505189	n-Tv5|chr13_962_tRNAVal_AAC-	yes	1.73042	0	1.22027	0	2.9387	0	3.74556	0	0.409841	0.19397	1.44677	1.60218	0.680762	0.00388623	0.587101	0.916979	1.47535	3.34213	NO	0.301906	1.52447	YES	0.342324	0.75204	YES	1.86679	4.6645289134368e-06	Up	0.81285	0.00545404	Null
545	chr13:23517515-23517603	n-Ty3|chr13_961_tRNATyr_GTA_I-	yes	3.03689	0	3.18985	0	4.79547	0	5.67488	0	1.16478	1.00367	3.29062	3.28959	1.18261	1.48702	2.18961	2.25574	3.11337	5.23517	NO	1.08422	3.2901	YES	1.33482	2.22267	NO	2.1218	5.24693539364933e-07	Up	1.31803	2.299848004739e-06	Up
546	chr13:23518374-23518461	n-Ty4|chr13_101_tRNATyr_GTA_I+	yes	2.81044	0	2.99196	0	5.47833	0	6.15279	0	0.895417	1.23435	3.89458	3.84992	1.68464	1.94059	2.89968	2.88627	2.9012	5.81556	NO	1.06488	3.87225	YES	1.81261	2.89298	NO	2.91436	1.66158489800144e-09	Up	1.727	5.28093736862225e-10	Up
547	chr13:23518964-23519049	n-Ty5|chr13_960_tRNATyr_GTA_I-	yes	2.12361	0	1.73676	0	1.87587	0	2.54385	0	0.395054	0.413578	0.686628	1.20912	0.92709	0.396733	0.468783	1.00042	1.93019	2.20986	NO	0.404316	0.947876	YES	0.661911	0.734602	YES	0.279671	0.422379	Null	0.470869	0.143551	Null
548	chr13:23520607-23520695	n-Ty6|chr13_959_tRNATyr_GTA_I-	yes	0.179508	0	0.402197	0	1.76704	0	2.40267	0	0.310588	0.310335	0.0671629	0.814557	-0.042479	0.0164854	-0.177654	-0.318896	0.290853	2.08485	NO	0.310461	0.44086	YES	-0.0129968	-0.248275	YES	1.794	3.75824068420269e-06	Up	0.365677	0.280168	Null
549	chr13:23523281-23523353	n-Ta13|chr13_102_tRNAAla_AGC+	yes	5.55155	0	5.97566	0	4.44414	0	4.87357	0	2.79351	2.89172	2.52006	2.79023	3.46822	3.84056	1.83827	1.74637	5.7636	4.65886	NO	2.84261	2.65515	NO	3.65439	1.79232	NO	-1.10475	0.00116478	Down	1.67461	1.5047778984562e-09	Up
550	chr13:23524859-23524946	n-Ty7|chr13_958_tRNATyr_GTA_I-	yes	4.07035	0	4.73867	0	1.67121	0	2.22381	0	2.14522	2.54561	0.802217	0.975134	2.76304	3.56302	0.0221657	0.0858839	4.40451	1.94751	NO	2.34541	0.888676	NO	3.16303	0.0540248	NO	-2.457	5.01713804596694e-08	Down	1.65227	2.45584348329672e-09	Up
551	chr13:23528209-23528281	n-Tk11|chr13_103_tRNALys_CTT+	yes	4.01274	0	4.39468	0	4.24363	0	4.8824	0	1.64327	1.74904	3.41558	3.07993	2.31306	2.44351	1.3447	1.22161	4.20371	4.56302	NO	1.69615	3.24775	NO	2.37828	1.28316	NO	0.359307	0.290776	Null	2.64673	1.67485109033566e-20	Up
552	chr13:23528863-23528934	n-Tp3|chr13_957_tRNAPro_AGG-	yes	3.96189	0	3.92975	0	5.57638	0	6.31455	0	1.65546	1.38179	3.60097	3.81651	2.46484	2.10217	2.58274	2.57569	3.94582	5.94546	NO	1.51863	3.70874	NO	2.28351	2.57922	NO	1.99964	8.28824628495461e-07	Up	1.89441	1.42079470130354e-11	Up
553	chr13:23529978-23530051	n-Ti8|chr13_956_tRNAIle_AAT-	yes	5.44669	0	5.47617	0	5.89894	0	6.19211	0	3.03497	2.52157	4.1677	4.07612	3.58509	3.59901	2.86485	3.07086	5.46143	6.04553	NO	2.77827	4.12191	NO	3.59205	2.96786	NO	0.5841	0.0636955	Null	1.96783	2.83971677818441e-12	Up
554	chr13:23530566-23530637	n-Ta29|chr13_955_tRNAAla_CGC-	yes	3.63639	0	4.45721	0	3.63336	0	4.3359	0	1.62504	2.09953	2.45746	2.20128	2.28827	2.49848	0.849945	0.814795	4.0468	3.98463	NO	1.86229	2.32937	NO	2.39338	0.83237	NO	-0.0621769	0.887052	Null	2.02809	9.01463082956122e-13	Up
555	chr13:23538011-23538083	n-Tv17|chr13_954_tRNAVal_CAC-	yes	4.31042	0	4.24321	0	2.47386	0	2.79057	0	2.38905	2.01766	1.72554	1.87829	2.86814	2.6071	0.781577	0.529068	4.27681	2.63222	NO	2.20336	1.80191	NO	2.73762	0.655322	NO	-1.6446	6.5544325281916e-06	Down	1.68085	1.31952430779601e-09	Up
556	chr13:23538661-23538733	n-Tr5|chr13_953_tRNAArg_ACG-	yes	4.54181	0	3.97417	0	1.48063	0	1.73628	0	2.24129	1.63913	1.60386	1.32508	2.85852	2.28373	0.508881	0.288652	4.25799	1.60845	NO	1.94021	1.46447	NO	2.57112	0.398766	NO	-2.64954	6.83194273660001e-09	Down	1.69661	9.81795005953625e-10	Up
557	chr13:23542491-23542564	n-Tt6|chr13_104_tRNAThr_AGT+	yes	4.75641	0	4.88802	0	5.5105	0	6.05947	0	2.58785	2.43238	3.62059	3.47838	3.03092	3.03105	2.15214	2.43121	4.82222	5.78499	NO	2.51011	3.54948	NO	3.03098	2.29168	NO	0.96277	0.00371153	Up	1.77868	1.71548805116372e-10	Up
558	chr13:23545301-23545383	n-Tl22|chr13_952_tRNALeu_CAG-	yes	4.84959	0	5.00755	0	1.62597	0	1.42902	0	2.57894	2.33358	0.724054	1.35912	3.17509	3.18761	0.613678	0.656034	4.92857	1.52749	NO	2.45626	1.04159	NO	3.18135	0.634856	NO	-3.40108	6.18363185653383e-11	Down	1.13182	6.24549220989153e-05	Up
559	chr13:23555404-23555475	n-Te15|chr13_105_tRNAGlu_TTC+	yes	4.16829	0	3.78673	0	5.93753	0	6.63885	0	1.65659	1.33536	4.22307	4.23462	2.40608	2.17434	3.13098	3.25075	3.97751	6.28819	NO	1.49598	4.22885	NO	2.29021	3.19087	NO	2.31068	1.04696821884649e-07	Up	1.83221	5.72016509906208e-11	Up
560	chr13:23558945-23559034	n-Ty8|chr13_106_tRNATyr_GTA_I+	yes	4.11518	0	4.21743	0	5.38529	0	5.86627	0	2.03739	1.63121	3.62883	3.82674	2.1873	2.3388	2.42295	2.85307	4.1663	5.62578	NO	1.8343	3.72778	NO	2.26305	2.63801	NO	1.45948	4.30946862609872e-05	Up	1.51853	4.03740836245987e-08	Up
561	chr13:23589975-23590046	n-Tw3|chr13_107_tRNATrp_CCA+	yes	3.07831	0	1.98144	0	5.05642	0	5.60726	0	0.889322	0.183531	3.42312	3.48804	1.47088	0.9321	2.10037	2.30216	2.52987	5.33184	NO	0.536426	3.45558	YES	1.20149	2.20126	NO	2.80197	2.14060465844512e-08	Up	1.91938	7.60244681178187e-12	Up
562	chr13:23591949-23592020	n-Tm5|chr13_108_tRNAMetInit_CAT+	yes	2.15727	0	1.59957	0	5.57886	0	6.25618	0	0.65752	0.21844	3.88434	3.9899	0.864465	0.587991	2.52462	2.67865	1.87842	5.91752	NO	0.43798	3.93712	YES	0.726228	2.60164	NO	4.0391	2.0884166029509e-11	Up	1.62373	4.47110228144976e-09	Up
563	chr13:23592391-23592463	n-Tr4|chr13_951_tRNAArg_ACG-	yes	1.11636	0	1.15027	0	5.01024	0	5.60436	0	-0.0996385	0.353661	3.4333	3.29756	0.584331	0.504155	1.67697	1.86133	1.13331	5.3073	NO	0.127011	3.36543	YES	0.544243	1.76915	NO	4.17399	4.50679996939949e-12	Up	2.01351	1.04201446146298e-12	Up
564	chr13:23592826-23592907	n-Ts7|chr13_950_tRNASer_AGA-	yes	2.67915	0	2.59522	0	5.74971	0	6.41827	0	0.872841	0.833501	3.82755	4.10147	1.07409	1.12768	2.96552	3.30947	2.63718	6.08399	NO	0.853171	3.96451	YES	1.10089	3.13749	NO	3.44681	1.25135334905853e-10	Up	1.07473	0.000147463	Up
565	chr13:23595849-23595921	n-Tr17|chr13_949_tRNAArg_TCG-	yes	4.07237	0	4.04418	0	4.12427	0	4.53821	0	1.92262	1.71667	3.04806	2.47235	2.24487	2.31058	1.09662	1.41	4.05827	4.33124	NO	1.81965	2.7602	NO	2.27773	1.25331	NO	0.272963	0.408613	Null	1.96498	2.8958032873463e-12	Up
566	chr13:23598388-23598459	n-Tw4|chr13_109_tRNATrp_CCA+	yes	4.09402	0	3.78983	0	5.33298	0	5.67087	0	1.85839	1.22386	3.43367	3.59642	2.21625	2.17189	2.44965	2.59347	3.94192	5.50192	NO	1.54112	3.51504	NO	2.19407	2.52156	NO	1.56	1.65782757961072e-05	Up	1.64643	2.76714958103052e-09	Up
567	chr13:23609072-23609142	n-Tg27|chr13_110_tRNAGly_GCC+	yes	4.59241	0	4.58111	0	3.81632	0	4.45127	0	2.46887	2.06314	2.64203	2.61071	2.64152	2.67186	1.37808	1.18269	4.58676	4.1338	NO	2.26601	2.62637	NO	2.65669	1.28038	NO	-0.452966	0.167887	Null	1.73667	4.17283894913057e-10	Up
568	chr13:23609561-23609632	n-Tm6|chr13_111_tRNAMetInit_CAT+	yes	4.51023	0	5.12253	0	4.57062	0	5.07843	0	1.87525	2.20745	3.01147	2.86261	2.52612	2.83304	1.77563	1.54579	4.81638	4.82453	NO	2.04135	2.93704	NO	2.67958	1.66071	NO	0.00814497	0.984961	Null	1.91456	8.3142498177735e-12	Up
569	chr13:23610015-23610096	n-Ts24|chr13_112_tRNASer_TGA+	yes	3.94434	0	4.1212	0	3.54726	0	4.10855	0	1.68648	1.37649	2.16391	1.93609	1.82083	2.17265	1.01701	1.05227	4.03277	3.8279	NO	1.53149	2.05	NO	1.99674	1.03464	NO	-0.204866	0.556013	Null	1.48061	8.92020648765361e-08	Up
570	chr13:23610919-23610990	n-Tq14|chr13_113_tRNAGln_TTG+	yes	4.91684	0	5.03098	0	5.34828	0	5.90916	0	2.59943	2.65906	3.46088	3.5497	3.00901	3.28786	2.44865	2.60022	4.97391	5.62872	NO	2.62924	3.50529	NO	3.14843	2.52444	NO	0.654814	0.0441177	Null	1.50004	5.95125774206645e-08	Up
571	chr13:23611482-23611553	n-Tq15|chr13_114_tRNAGln_TTG+	yes	4.23791	0	4.44755	0	5.51658	0	6.11077	0	2.07254	2.32063	3.84773	3.68064	2.30936	2.65322	2.40716	2.45465	4.34273	5.81368	NO	2.19659	3.76418	NO	2.48129	2.43091	NO	1.47095	5.04578224862492e-05	Up	1.61798	5.06381434010993e-09	Up
572	chr13:23613739-23613820	n-Ts18|chr13_115_tRNASer_GCT+	yes	5.03767	0	5.46417	0	4.76522	0	5.24227	0	2.74413	2.86167	3.0374	3.31425	3.25786	3.62723	1.80288	2.09679	5.25092	5.00375	NO	2.8029	3.17582	NO	3.44255	1.94984	NO	-0.247174	0.469921	Null	1.86563	2.66557250758769e-11	Up
573	chr13:23618325-23618397	n-Tr15|chr13_948_tRNAArg_TCG-	yes	4.31712	0	4.47761	0	3.01384	0	3.72355	0	2.49853	1.92391	1.68838	1.7671	2.87964	2.84094	0.585186	0.528593	4.39736	3.36869	NO	2.21122	1.72774	NO	2.86029	0.556889	NO	-1.02867	0.00269665	Down	1.81993	7.45759258437055e-11	Up
574	chr13:23622217-23622288	n-Tm9|chr13_947_tRNAMetInit_CAT-	yes	4.75235	0	5.03736	0	5.21351	0	5.92919	0	2.62603	2.34124	3.75636	3.59329	2.99256	3.01508	2.36011	2.07844	4.89486	5.57135	NO	2.48363	3.67483	NO	3.00382	2.21928	NO	0.676497	0.0442229	Null	1.97573	2.6220416219287e-12	Up
575	chr13:25022629-25022811	B2_Mm1t_SINE_B2+	yes	2.36177	0	2.11748	0	0.36056	0	0.893457	0	1.10252	0.305135	0.427637	0.536043	1.10701	0.836586	0.42338	-0.185534	2.23962	0.627009	NO	0.70383	0.48184	YES	0.971796	0.118923	YES	-1.61261	1.34643226864851e-05	Down	0.630883	0.0390156	Null
576	chr13:58560282-58560381	B2_Mm1aB2_SINE-	no	0.315372	4.73	0.0161222	6.06	4.72845	8.71	5.46124	9.25	-0.284851	-0.258566	3.11152	3.26661	-0.279121	-0.102625	2.09253	2.09953	0.165747	5.09484	NO	-0.271708	3.18907	YES	-0.190873	2.09603	NO	4.9291	6.37695427294913e-13	Up	1.17387	3.13138119526467e-05	Up
577	chr13:94385175-94385274	B2_Mm2_B2_SINE-	no	1.6574	0	1.60719	0	-0.0413069	0	0.824956	0	0.412261	0.0552946	0.556243	0.119103	0.716525	0.716295	0.127937	0.0456765	1.6323	0.391825	NO	0.233778	0.337673	YES	0.71641	0.0868066	YES	-1.24047	0.000586868	Down	0.733498	0.0133595	Null
578	chr14:49095552-49095651	NA_26	no	1.90389	6.04	2.23045	10.38	-0.540628	3.33	-0.440357	5.71	0.0425985	-0.0196	-0.530233	-0.421747	-0.0809476	0.362977	-0.391406	-0.163598	2.06717	-0.490492	NO	0.0114993	-0.47599	YES	0.141015	-0.277502	YES	-2.55766	6.83194273660001e-09	Down	-0.0689718	0.87187	Null
579	chr14:51422741-51422840	B2_Mm2_B2_SINE+	no	0.648317	0	0.371805	0	2.73918	0	3.35982	0	0.268701	0.34754	1.32625	1.38586	0.29012	-0.192525	0.678565	0.376415	0.510061	3.0495	NO	0.30812	1.35606	YES	0.0487976	0.52749	YES	2.53944	1.57931653151157e-08	Up	0.569243	0.0676133	Null
580	chr14:51427123-51427447	Rpph1|RnasePRNA-	yes	2.90832	0	2.55066	0	4.15974	0	4.62123	0	1.55881	0.29258	2.36856	2.52308	1.18116	0.647475	1.2707	1.67565	2.72949	4.39049	NO	0.925694	2.44582	YES	0.91432	1.47318	YES	1.661	8.8705811799566e-06	Up	0.961273	0.000791869	Up
581	chr14:51683558-51683639	n-Tl8|chr14_188_tRNALeu_AAG+	yes	5.56732	0	5.72628	0	6.1215	0	6.57529	0	3.21109	2.76211	4.04289	4.11653	3.57641	3.52829	2.92515	3.23508	5.6468	6.3484	NO	2.9866	4.07971	NO	3.55235	3.08012	NO	0.701594	0.0292349	Null	1.56535	1.5478083542778e-08	Up
582	chr14:51684489-51684560	n-Tp4|chr14_705_tRNAPro_AGG-	yes	4.0601	0	4.63904	0	5.73922	0	6.33792	0	1.60673	1.79257	3.8238	3.87577	2.12237	2.67985	2.7312	2.71742	4.34957	6.03857	NO	1.69965	3.84979	NO	2.40111	2.72431	NO	1.689	1.29543641216268e-05	Up	1.82693	6.38175923963782e-11	Up
583	chr14:51684843-51684915	n-Tt17|chr14_704_tRNAThr_TGT-	yes	3.98831	0	4.6452	0	5.44877	0	6.19596	0	1.78463	1.92413	3.61165	3.6583	2.28095	2.64335	2.53999	2.63905	4.31675	5.82236	NO	1.85438	3.63498	NO	2.46215	2.58952	NO	1.50561	9.05297578255245e-05	Up	1.65323	2.42913711002281e-09	Up
584	chr14:51702505-51702586	n-Tl28|chr14_703_tRNALeu_TAG-	yes	3.81692	0	3.28898	0	4.85794	0	5.55562	0	1.76275	0.784507	3.0208	3.25824	2.10789	1.62835	2.20945	2.40522	3.55295	5.20678	NO	1.27363	3.13952	NO	1.86812	2.30733	NO	1.65383	1.94950380424546e-05	Up	1.42668	2.7255027106719e-07	Up
585	chr14:51708325-51708397	n-Tt15|chr14_190_tRNAThr_TGT+	yes	4.32601	0	4.76211	0	4.81305	0	5.56372	0	2.075	2.1074	2.92635	2.91869	2.62701	2.99374	1.83782	1.93821	4.54406	5.18839	NO	2.0912	2.92252	NO	2.81038	1.88801	NO	0.644327	0.0601961	Null	1.75368	2.92887183546114e-10	Up
586	chr14:51709164-51709253	n-Ty10|chr14_191_tRNATyr_GTA_I+	yes	5.22572	0	5.28035	0	5.55722	0	6.09	0	2.87678	2.42915	3.64691	3.80089	3.15873	3.29574	2.62131	2.8923	5.25304	5.82361	NO	2.65296	3.7239	NO	3.22723	2.75681	NO	0.570576	0.0777053	Null	1.54136	2.50985642745688e-08	Up
587	chr14:51710322-51710393	n-Tp15|chr14_192_tRNAPro_TGG+	yes	4.17276	0	4.01934	0	5.94842	0	6.63718	0	2.12271	1.53672	4.0988	4.19796	2.36231	2.40412	3.03471	3.22216	4.09605	6.2928	NO	1.82971	4.14838	NO	2.38322	3.12843	NO	2.19676	1.75670839586201e-07	Up	1.57345	1.32533449221376e-08	Up
588	chr14:55136533-55136605	n-Tr6|chr14_209_tRNAArg_ACG+	yes	5.15083	0	5.46372	0	6.35641	0	6.81579	0	2.92711	2.8728	4.39707	4.43549	3.4697	3.62876	3.208	3.49798	5.30728	6.5861	NO	2.89995	4.41628	NO	3.54923	3.35299	NO	1.27883	0.000235601	Up	1.71257	7.05764426603591e-10	Up
589	chr14:55512400-55512584	B1_Mur3_SINE_Alu+	yes	2.38413	0	1.66716	0	2.25943	0	2.8618	0	1.21441	-0.210921	0.986897	0.754892	1.60322	0.663735	0.281194	0.214593	2.02564	2.56061	NO	0.501745	0.870894	YES	1.13348	0.247894	NO	0.534972	0.123125	Null	1.25473	7.49004249633542e-06	Up
590	chr14:59436990-59437063	n-Tt2|chr14_628_tRNAThr_AGT-	yes	0.291271	0	0.00967221	0	0.0138375	0	-0.29417	0	-0.0422781	-0.193997	-0.116839	-0.0168117	0.320656	0.143524	0.178052	0.0115107	0.150471	-0.140166	YES	-0.118137	-0.0668251	YES	0.23209	0.0947814	YES	-0.290638	0.375865	Null	0.188621	0.616261	Null
591	chr14:71113711-71113810	B1_Mus1_Alu_SINE+	no	2.0156	0	1.56757	0	-0.143135	0	-0.484058	0	0.934393	0.488439	-0.117765	-0.752352	0.659619	0.399216	-0.202385	-0.0782783	1.79159	-0.313596	NO	0.711416	-0.435059	YES	0.529418	-0.140332	YES	-2.10518	2.36094156228829e-07	Down	-0.476725	0.13817	Null
592	chr14:73693701-73693800	B2_Mm1t_B2_SINE+	no	1.68742	0	2.02144	0	0.732295	0	1.32101	0	0.708541	0.664701	0.0624693	0.243794	0.681634	0.532129	-0.445459	0.0114664	1.85443	1.02665	NO	0.686621	0.153132	YES	0.606882	-0.216996	YES	-0.827778	0.0130835	Null	0.290389	0.404854	Null
593	chr14:74022510-74022609	B1_Mus2_Alu_SINE-	no	1.32274	0	1.44281	0	0.121028	0	0.279591	0	0.0102848	0.49745	-0.146052	0.41553	0.269165	0.384048	0.145373	0.0894548	1.38278	0.200309	NO	0.253867	0.134739	YES	0.326607	0.117414	YES	-1.18247	0.000370463	Down	0.0900648	0.827139	Null
594	chr14:76552581-76552652	n-Te16|chr14_347_tRNAGlu_TTC+	yes	4.36099	0	4.5607	0	5.78388	0	6.45744	0	2.09329	1.81917	3.9785	4.04254	2.42323	2.57576	2.9219	3.00733	4.46084	6.12066	NO	1.95623	4.01052	NO	2.4995	2.96462	NO	1.65982	1.17782627799547e-05	Up	1.58917	9.40520265470984e-09	Up
595	chr14:79881475-79881546	n-Te14|chr14_359_tRNAGlu_TTC+	yes	3.82501	0	4.075	0	5.96975	0	6.4666	0	1.49415	1.53652	3.82268	3.84936	1.85554	2.06901	2.82086	3.07885	3.95001	6.21817	NO	1.51533	3.83602	NO	1.96228	2.94986	NO	2.26817	7.39729880988729e-08	Up	1.33311	1.71956705087127e-06	Up
596	chr14:118488747-118488819	n-Tf5|chr14_457_tRNAPhe_GAA-	yes	3.73552	0	3.22473	0	0.0491296	0	-0.32304	0	1.47277	0.78997	-0.512515	-0.296742	2.16641	1.51727	-0.148323	-0.426509	3.48013	-0.136955	NO	1.13137	-0.404628	YES	1.84184	-0.287416	NO	-3.61708	5.33730136633132e-11	Down	0.593253	0.0551749	Null
597	chr15:16205705-16205778	n-Tn2|chr15_1013_tRNAAsn_GTT-	yes	-0.378986	0	0.432137	0	-0.14138	0	-0.364937	0	-0.456971	-0.00540884	-0.45266	-0.104203	-0.14387	0.085874	-0.344339	0.183311	0.0265754	-0.253158	YES	-0.23119	-0.278432	YES	-0.0289979	-0.0805143	YES	-0.279734	0.428741	Null	0.00427468	0.992093	Null
598	chr15:24993315-24993414	L1Md_A_L1_LINE+	no	1.95796	97.1	1.80329	93.44	-0.276253	100	-0.110938	91.52	1.81789	0.346248	0.0333977	-0.000864493	0.370023	0.247567	0.11158	0.0763636	1.88062	-0.193596	NO	1.08207	0.0162666		0.308795	0.0939716		-2.07422	1.73071890111143e-07	Down	-0.850979	0.00345164	Down
599	chr15:31156406-31156651	B2_Mm2_SINE_B2+	yes	1.5198	0	1.40065	0	1.34711	0	1.96657	0	0.120915	0.30684	0.34257	0.576893	0.821081	0.0815589	-0.269395	0.131598	1.46022	1.65684	NO	0.213878	0.459732	YES	0.45132	-0.0688984	YES	0.196616	0.577761	Null	0.766073	0.00929942	Null
600	chr15:31643910-31644009	NA_27	no	1.42319	0.47	1.31604	1.6	-1.37222	0	-1.54163	0	0.797691	-0.293716	-0.886858	-1.6327	-0.189426	-0.330336	-0.338307	-0.680089	1.36961	-1.45693	NO	0.251987	-1.25978		-0.259881	-0.509198		-2.82654	1.02833856830149e-09	Down	-1.26245	6.49875262743445e-06	Down
601	chr15:41621390-41621489	B1_Mus1_Alu_SINE+	no	1.56062	0.1	1.47588	0	1.21894	0.14	2.04423	0.15	0.106543	0.184727	-0.109753	0.0724526	0.521369	0.686787	-0.24704	0.0333427	1.51825	1.63158	NO	0.145635	-0.0186504	YES	0.604078	-0.106849	YES	0.113335	0.765307	Null	0.546641	0.0814093	Null
602	chr15:57807538-57807610	n-Tm16|chr15_913_tRNAMet_CAT-	yes	4.57156	0	5.04093	0	5.19045	0	5.38012	0	2.38326	2.39913	3.69773	3.72192	2.72383	3.14887	2.40445	2.79321	4.80624	5.28528	NO	2.3912	3.70982	NO	2.93635	2.59883	NO	0.479038	0.136153	Null	1.65615	2.29531512310814e-09	Up
603	chr15:58818221-58818320	NA_28	no	1.30391	0	1.4205	0	-0.53662	0	-0.731801	0	0.561663	0.0920532	-0.851798	-0.580543	0.316523	0.137537	-0.662924	-0.825181	1.36221	-0.634211	NO	0.326858	-0.71617	YES	0.22703	-0.744052	YES	-1.99642	3.11916572616228e-07	Down	-0.0719464	0.86665	Null
604	chr15:58879494-58879593	NA_29	no	1.27841	0	1.29081	0	-0.877709	0	-0.69691	0	-0.0905579	-0.0040433	-0.970602	-0.774243	0.287713	-0.04042	-0.781163	-0.577163	1.28461	-0.787309	NO	-0.0473006	-0.872422	YES	0.123646	-0.679163	YES	-2.07192	1.69739143598163e-07	Down	-0.0223125	0.968255	Null
605	chr15:69227053-69227124	n-Tm3|chr15_876_tRNAMet_CAT-	yes	-0.11984	0	0.195026	0	-0.608123	0	-0.320509	0	-0.158391	0.369218	-0.833034	-0.893948	-0.228505	0.103966	-0.668827	-0.75614	0.0375929	-0.464316	YES	0.105414	-0.863491	YES	-0.06227	-0.712483	YES	-0.501909	0.114542	Null	-0.318691	0.353783	Null
606	chr15:81295628-81295727	B1_Mus1_Alu_SINE+	no	0.251775	0	0.447624	0	2.38548	0	2.84859	0	-0.322494	0.417963	0.794784	1.04629	-0.110349	0.332299	0.412758	0.641189	0.349699	2.61704	NO	0.0477344	0.920539	YES	0.110975	0.526974	YES	2.26734	6.60149573378108e-08	Up	0.456806	0.158395	Null
607	chr15:88471962-88472034	n-Tm4|chr15_355_tRNAMet_CAT+	yes	0.163353	0	0.0492974	0	0.121437	0	-0.1649	0	0.317922	0.111026	0.335111	-0.126449	0.140608	0.0590055	-0.02111	-0.313899	0.106325	-0.0217313	YES	0.214474	0.104331	YES	0.0998069	-0.167505	YES	-0.128057	0.713464	Null	0.157169	0.686375	Null
608	chr15:93064869-93064968	NA_30	no	2.73271	94.08	2.67543	95.45	4.69907	97.65	5.1434	98.43	0.938699	0.664042	2.42781	2.74914	1.11933	1.19952	1.88409	2.26917	2.70407	4.92124	NO	0.801371	2.58848		1.15943	2.07663		2.21717	8.4630614222186e-08	Up	0.869902	0.00270268	Up
609	chr15:99697526-99697625	B3A_B2_SINE+	no	0.203645	0	0.0120425	0	1.95523	0	2.52297	0	0.106682	-0.158194	0.84305	0.99384	0.080228	-0.190818	-0.0774932	0.100703	0.107844	2.2391	NO	-0.0257558	0.918445	YES	-0.0552951	0.0116051	YES	2.13126	2.11920767510616e-07	Up	0.877301	0.00246289	Up
610	chr15:100213624-100213723	ID_B1_B4_SINE-_and_B1_Mur3_Alu_SINE+	no	1.68218	0	1.60716	0	-0.0491553	0	-0.558352	0	0.340147	0.367137	-0.331362	0.0637166	0.489894	0.385396	-0.426876	0.0683466	1.64467	-0.303754	NO	0.353642	-0.133823	YES	0.437645	-0.179265	YES	-1.94842	7.06767699337513e-07	Down	0.129445	0.746362	Null
611	chr16:3012009-3012080	n-Tl2|chr16_829_tRNALeu_AAG-	yes	-0.0524641	100	0.0643218	100	0.481837	100	0.590492	100	0.00703191	-0.0793313	0.420016	0.299741	0.0354893	-0.0791942	0.636786	0.27497	0.00592882	0.536164	YES	-0.0361497	0.359879	YES	-0.0218525	0.455878	YES	0.530235	0.0891293	Null	-0.0817024	0.842016	Null
612	chr16:3449838-3449909	n-Tl1|chr16_4_tRNALeu_AAG+	yes	0.04361	50.74	-0.134878	71.69	0.304583	51.47	0.776831	41.3	0.22815	0.212201	0.531028	0.349858	0.154624	0.0819307	0.467211	0.211783	-0.0456339	0.540707	YES	0.220175	0.440443	YES	0.118277	0.339497	YES	0.586341	0.0685432	Null	-0.000951595	0.998021	Null
613	chr16:10347819-10347918	NA_31	no	1.49098	0	1.40747	0	0.268724	0	-0.203378	0	0.284007	0.047522	-0.455276	0.306248	0.725005	0.690108	0.555917	0.483584	1.44922	0.0326732	NO	0.165764	-0.0745139	YES	0.707556	0.519751	YES	-1.41655	6.13793664865863e-05	Down	-0.0524724	0.903704	Null
614	chr16:11144252-11144351	LSU-rRNA_Hsa_rRNA_rRNA+	no	1.29221	32.08	1.72453	35.79	0.805225	29.76	1.03971	35.83	-0.0441976	-0.324424	-0.0385109	0.245348	-0.24318	-0.127148	0.654996	1.0788	1.50837	0.922468	NO	-0.184311	0.103418		-0.185164	0.866898		-0.585904	0.0683433	Null	-0.764332	0.0094759	Null
615	chr16:13437416-13437487	n-Tt14|chr16_50_tRNAThr_CGT+	yes	4.26402	0	4.36787	0	5.34415	0	5.58431	0	1.72469	1.61404	3.24495	3.34844	2.39023	2.43713	2.24417	2.55961	4.31595	5.46423	NO	1.66936	3.29669	NO	2.41368	2.40189	NO	1.14828	0.000531258	Up	1.63912	3.23500576271334e-09	Up
616	chr16:14131871-14132075	B2_Mm1t_SINE_B2-	yes	1.99675	1.34	2.07955	0.54	-0.790238	0.93	-0.738461	0.84	0.498865	0.494718	-0.759416	-0.887794	0.768526	1.05622	-0.516158	-0.837255	2.03815	-0.76435	NO	0.496792	-0.823605	YES	0.912371	-0.676707	YES	-2.8025	1.08184835925937e-09	Down	0.268681	0.443521	Null
617	chr16:16854357-16854429	n-Tk3|chr16_76_tRNALys_CTT+	yes	-0.0694829	0	-0.172136	0	-0.0601105	0	0.397089	0	-0.403537	-0.234723	0.14547	0.440831	-0.0901942	-0.243724	-0.00651927	0.237851	-0.12081	0.168489	YES	-0.31913	0.29315	YES	-0.166959	0.115666	YES	0.289299	0.381041	Null	0.329655	0.335573	Null
618	chr16:18058411-18058510	B1_Mm_Alu_SINE-	no	0.518347	0	0.284426	0	2.35484	0	2.73557	0	0.461623	-0.493823	0.831045	0.905428	0.650614	-0.273618	-0.120053	0.24459	0.401387	2.5452	NO	-0.0161	0.868236	YES	0.188498	0.0622685	YES	2.14382	1.41444792070463e-07	Up	1.01057	0.000386923	Up
619	chr16:30394020-30394119	B2_Mm2_B2_SINE-	no	0.251775	0	0.72192	0	3.42977	0	4.14244	0	-0.349019	0.222538	2.01236	2.14057	-0.258536	0.107075	1.3211	1.23288	0.486848	3.7861	NO	-0.0632408	2.07646	NO	-0.0757305	1.27699	YES	3.29925	3.87014124364356e-10	Up	0.786984	0.00738027	Null
620	chr16:31205978-31206077	B2_Mm1t_B2_SINE+	no	0.459381	4.68	-0.0664663	7.95	2.5269	11.79	3.09077	12.71	0.303153	-0.34529	1.14285	1.43835	0.16813	-0.277698	0.448034	0.584941	0.196457	2.80884	NO	-0.0210685	1.2906	YES	-0.0547839	0.516487	YES	2.61238	1.28849139055072e-08	Up	0.740399	0.0124002	Null
621	chr16:31399621-31399720	B2_Mm2_B2_SINE+	no	2.5281	0.24	2.09661	0.32	0.605367	2.2	0.696685	1.33	1.0496	0.7532	0.233504	0.139353	1.38279	0.711235	0.569252	0.235142	2.31235	0.651026	NO	0.901402	0.186429	YES	1.04701	0.402197	YES	-1.66132	6.75434558791043e-06	Down	-0.070158	0.870684	Null
622	chr16:38275006-38275105	B2_Mm2_B2_SINE+	no	0.751476	0	0.5579	0	3.32403	0	3.97869	0	0.207692	-0.0870609	1.90312	1.80796	0.467342	0.270352	0.839029	1.00734	0.654688	3.65136	NO	0.0603155	1.85554	YES	0.368847	0.923183	YES	2.99668	1.00378085885593e-09	Up	1.24089	9.56030862137566e-06	Up
623	chr16:43806665-43806764	NA_32	no	0.071948	0	0.0102321	0	2.1414	0	2.94202	0	-0.279411	0.28189	1.30197	1.20536	-0.0343711	-0.00131075	0.710767	0.715646	0.04109	2.54171	NO	0.00123949	1.25366	YES	-0.0178409	0.713206	YES	2.50062	2.95784647447662e-08	Up	0.521376	0.0986556	Null
624	chr16:47144150-47144249	L1Md_T_L1_LINE-	no	1.84501	92.24	1.77707	95.02	-0.176543	78.35	-0.0799002	76.72	1.73582	0.0813355	0.267392	0.161029	0.218639	0.323555	0.34985	0.141015	1.81104	-0.128222	NO	0.90858	0.214211		0.271097	0.245432		-1.93927	4.48357899564933e-07	Down	-0.668704	0.0266354	Null
625	chr16:47250659-47250731	n-Tk2|chr16_267_tRNALys_CTT+	yes	-0.288931	0	0.370594	0	0.149693	0	0.229362	0	-0.341777	0.138263	0.452338	0.318042	-0.650505	0.0403125	0.220056	-0.236929	0.0408316	0.189528	YES	-0.101757	0.38519	YES	-0.305096	-0.0084364	YES	0.148696	0.680593	Null	0.190287	0.614864	Null
626	chr16:57391641-57391740	LSU-rRNA_Hsa_rRNA_rRNA-	no	1.20235	8.53	1.42329	9.29	0.732348	9.01	0.807888	11.63	-0.186696	-0.215038	-0.15234	0.0797876	0.000318232	-0.00512137	0.365891	0.760149	1.31282	0.770118	NO	-0.200867	-0.0362761		-0.00240157	0.56302		-0.542701	0.0833198	Null	-0.400831	0.224359	Null
627	chr16:75434424-75434497	n-Ti1|chr16_315_tRNAIle_AAT+	yes	0.178288	0	0.0319085	0	-0.0149628	0	-0.0994381	0	-0.0247895	-0.186354	-0.101219	-0.0727638	0.228295	-0.235779	-0.270845	-0.0535096	0.105098	-0.0572005	YES	-0.105572	-0.0869913	YES	-0.00374235	-0.162177	YES	-0.162299	0.634114	Null	0.177016	0.640902	Null
628	chr16:78992449-78992548	L1Md_T_L1_LINE+	no	1.6369	0	1.83982	0	-0.131442	0	0.0383643	0	1.34016	-0.2556	0.910153	0.823378	0.301725	-0.217187	0.601557	0.389744	1.73836	-0.0465391	NO	0.542282	0.866765		0.0422688	0.49565		-1.7849	1.84291945426674e-06	Down	-0.128898	0.747308	Null
629	chr16:84746464-84746699	B1_Mus1_SINE_Alu+	yes	3.36507	0	3.02002	0	-0.0131391	0	-0.380317	0	1.52828	0.999759	-0.0336402	-0.14211	1.95978	1.70393	-0.617871	-0.0696566	3.19254	-0.196728	NO	1.26402	-0.0878749	NO	1.83186	-0.343764	NO	-3.38927	1.13635191554836e-10	Down	0.823727	0.00481379	Up
630	chr16:91770236-91770335	B2_Mm1t_B2_SINE-	no	1.63831	0	1.36818	0	-0.46996	0	-0.603206	0	0.692012	0.424541	-0.812228	-0.752808	0.529168	0.41059	-0.930113	-0.769554	1.50324	-0.536583	NO	0.558277	-0.782518	YES	0.469879	-0.849833	YES	-2.03983	2.3872130382356e-07	Down	-0.0210828	0.969843	Null
631	chr17:23670929-23671001	n-Tk13|chr17_82_tRNALys_CTT+	yes	3.08115	56.74	2.65104	50.84	5.03528	50.49	5.67723	52.41	1.2499	0.907779	3.0796	3.27007	1.24259	1.18056	2.20396	2.20486	2.86609	5.35626	NO	1.07884	3.17484	YES	1.21158	2.20441	NO	2.49016	2.88745864345919e-08	Up	1.10316	9.68232010965768e-05	Up
632	chr17:23672299-23672371	n-Tk12|chr17_1000_tRNALys_CTT-	yes	2.60683	60.23	2.14608	49.48	4.71599	55.56	5.41209	55.4	0.529895	0.555702	2.86483	2.99349	0.903478	0.659947	1.93021	1.92736	2.37645	5.06404	NO	0.542798	2.92916	YES	0.781712	1.92878	NO	2.68759	9.89619032032739e-09	Up	1.2393	9.81015040039771e-06	Up
633	chr17:23675733-23675804	n-Tp11|chr17_998_tRNAPro_TGG-	yes	0.533634	0	-0.0664219	0	2.37437	0	2.60209	0	0.0654196	0.146982	1.40844	1.55914	0.092361	0.0017102	1.37435	1.52148	0.233606	2.48823	NO	0.106201	1.48379	YES	0.0470356	1.44791	YES	2.25462	9.93269096826655e-08	Up	-0.0232892	0.968255	Null
634	chr17:23677882-23677953	n-Tp10|chr17_83_tRNAPro_CGG+	yes	3.35179	0	1.94119	0	4.98022	0	5.66447	0	1.1756	0.409621	3.27447	3.27989	1.82409	0.574002	1.91976	2.33853	2.64649	5.32235	NO	0.792608	3.27718	YES	1.19904	2.12914	NO	2.67586	1.80109021616192e-07	Up	1.55447	1.92041581559121e-08	Up
635	chr17:23683443-23683514	n-Tp16|chr17_996_tRNAPro_TGG-	yes	3.69164	0	4.46655	0	5.73144	0	6.10816	0	1.60422	1.93134	3.61341	3.63289	1.83668	2.66108	2.52657	2.61478	4.07909	5.9198	NO	1.76778	3.62315	NO	2.24888	2.57067	NO	1.84071	4.2957465368453e-06	Up	1.53357	2.90462102721177e-08	Up
636	chr17:23684327-23684399	n-Tk14|chr17_84_tRNALys_CTT+	yes	3.82611	0	4.01101	0	6.27366	0	6.71112	0	1.65975	1.63316	4.31143	4.29054	2.05258	2.22771	2.96609	3.28962	3.91856	6.49239	NO	1.64646	4.30099	NO	2.14014	3.12786	NO	2.57382	7.71018377323531e-09	Up	1.66682	1.7821074099908e-09	Up
637	chr17:23685735-23685807	n-Tr11|chr17_995_tRNAArg_CCT-	yes	4.61544	0	4.4203	0	5.82091	0	6.20585	0	2.51082	1.57398	4.05555	4.05757	2.81202	2.42749	2.96238	3.17946	4.51787	6.01338	NO	2.0424	4.05656	NO	2.61975	3.07092	NO	1.49551	2.81005888580706e-05	Up	1.56299	1.62242338630111e-08	Up
638	chr17:23687230-23687302	n-Tr8|chr17_994_tRNAArg_CCG-	yes	3.57417	0	4.17992	0	6.57202	0	7.08821	0	1.31114	1.92691	4.72598	4.62818	1.80322	2.38436	3.42079	3.6104	3.87704	6.83011	NO	1.61902	4.67708	NO	2.09379	3.5156	NO	2.95307	1.75253029019566e-09	Up	1.63625	3.42086645497569e-09	Up
639	chr17:24832079-24832178	B1_Mus1_Alu_SINE-	no	0.772739	0	0.639059	0	1.93014	0	2.35609	0	-0.152831	-0.133655	0.57283	0.7121	0.0440272	0.00428963	0.223206	0.24213	0.705899	2.14312	NO	-0.143243	0.642465	YES	0.0241584	0.232668	YES	1.43722	4.88344646820699e-05	Up	0.577198	0.0632586	Null
640	chr17:24863030-24863129	B2_Mm2_B2_SINE-_and_B1_Mur4_Alu_SINE+	no	0.0977491	0	0.488759	0	1.90816	0	2.74738	0	-0.34272	0.328077	0.955401	0.871539	-0.175552	0.441475	0.262862	0.09888	0.293254	2.32777	NO	-0.00732137	0.91347	YES	0.132961	0.180871	YES	2.03452	1.13586559891691e-06	Up	0.872882	0.00260209	Up
641	chr17:26012033-26012103	n-Tg7|chr17_113_tRNAGly_CCC+	yes	4.45238	0	4.60608	0	5.29847	0	5.66288	0	2.36587	1.87887	3.28648	3.40732	2.54932	2.74654	2.21976	2.54303	4.52923	5.48067	NO	2.12237	3.3469	NO	2.64793	2.38139	NO	0.951443	0.00341523	Up	1.49106	7.22513905848907e-08	Up
642	chr17:30794465-30794672	B3_SINE_B2-	yes	2.7684	0	2.68893	0	1.29181	0	1.65556	0	0.828065	0.829719	0.223383	0.105173	1.1324	1.34867	0.176787	0.281435	2.72867	1.47368	NO	0.828892	0.164278	YES	1.24053	0.229111	NO	-1.25499	0.000224951	Down	0.34681	0.308159	Null
643	chr17:39982297-39982396	Rn45s	no	1.5837	0	1.64725	0	0.773195	0	0.762241	0	-0.0844521	-0.535831	-0.00816353	0.245355	-0.247817	-0.161449	0.660418	1.029	1.61547	0.767718	NO	-0.310142	0.118596		-0.204633	0.844708		-0.847756	0.00723913	Null	-0.620603	0.0429699	Null
644	chr17:56231424-56231495	n-Te4|chr17_720_tRNAGlu_CTC-	yes	-0.217817	16.14	0.572842	8.06	-0.501786	16.77	-0.558895	24.25	-0.141899	0.191013	-0.833594	-0.2784	-0.0201723	0.212118	-0.596536	-0.641716	0.177513	-0.530341	YES	0.0245571	-0.555997	YES	0.0959729	-0.619126	YES	-0.707854	0.0365211	Null	0.134545	0.734303	Null
645	chr17:56545262-56545361	B4_B4_SINE+	no	1.64915	0	1.02286	0	-0.760755	0	-0.0946294	0	0.42802	-0.270361	-0.288891	-0.782029	0.727583	-0.0719848	-0.396332	-0.394555	1.336	-0.427692	NO	0.0788299	-0.53546	YES	0.327799	-0.395443	YES	-1.7637	8.90730594185452e-06	Down	0.108952	0.790354	Null
646	chr17:59208131-59208203	n-Tv11|chr17_392_tRNAVal_CAC+	yes	-0.0535584	0	0.160382	0	0.466556	0	1.10663	0	-0.746903	0.58437	0.57951	0.428901	-0.0399015	0.372226	0.247353	0.37803	0.0534119	0.786592	YES	-0.0812665	0.504205	YES	0.166162	0.312691	YES	0.73318	0.0268029	Null	0.438943	0.179465	Null
647	chr17:71146704-71146803	B2_Mm2_B2_SINE-	no	0.834057	0	0.488817	0	3.54523	0	4.10419	0	0.445936	0.491259	1.97037	2.20762	0.536277	-0.234929	1.27579	1.63024	0.661437	3.82471	NO	0.468598	2.089	NO	0.150674	1.45302	YES	3.16327	3.96850730804811e-10	Up	0.318056	0.35421	Null
648	chr17:71948611-71948682	n-Tc52|chr17_458_tRNACys_GCA+	yes	3.11137	0	2.7909	0	2.91824	0	3.41449	0	1.3104	0.662991	1.30156	1.50984	1.45092	1.36228	0.961635	0.367405	2.95113	3.16637	NO	0.986695	1.4057	YES	1.4066	0.66452	NO	0.215232	0.532214	Null	1.16109	3.86666116605496e-05	Up
649	chr17:84261284-84261376	n-Ti17|chr17_516_tRNAIle_TAT_I+	yes	4.34154	0	3.85543	0	5.47297	0	5.73099	0	2.36269	1.39262	3.46281	3.62634	2.64863	1.9756	2.37624	2.64391	4.09849	5.60198	NO	1.87765	3.54458	NO	2.31212	2.51007	NO	1.50349	3.23884260894202e-05	Up	1.46896	1.13449207983157e-07	Up
650	chr18:20251213-20251312	B3A_B2_SINE+	no	-0.0816848	0	0.187611	0	2.88876	0	3.28894	0	0.215453	-0.0587504	1.30262	1.56293	0.236491	0.337514	0.874883	0.775692	0.052963	3.08885	NO	0.0783513	1.43278	YES	0.287003	0.825287	YES	3.03589	4.84228224383584e-10	Up	0.816142	0.00525505	Null
651	chr18:36961520-36961662	Vaultrc5|Vault+	yes	4.55303	0	4.64146	0	6.32523	0	6.85974	0	2.43837	2.23631	4.48829	4.51154	2.68281	2.96601	3.28588	3.44506	4.59725	6.59248	NO	2.33734	4.49991	NO	2.82441	3.36547	NO	1.99523	5.20730393814794e-07	Up	1.62151	4.68407989929947e-09	Up
652	chr18:46446083-46446154	n-Tt10|chr18_633_tRNAThr_CGT-	yes	0.0985634	0	-0.0716853	0	-0.236961	0	0.028017	0	-0.0994285	0.00865135	0.284569	-0.063485	-0.218147	0.249593	0.129815	0.385154	0.0134391	-0.104472	YES	-0.0453886	0.110542	YES	0.0157227	0.257485	YES	-0.117911	0.737735	Null	-0.085831	0.834306	Null
653	chr18:60961733-60961832	RLTR30_ERV1_LTR+_and_B2_Mm1a_B2_SINE+	no	1.91869	2.55	1.72178	2.19	0.994821	5.61	1.80111	4.7	0.0532998	0.152731	0.426634	0.726081	0.565022	0.560786	0.678852	0.365299	1.82023	1.39797	NO	0.103015	0.576358	YES	0.562904	0.522076	YES	-0.422263	0.217521	Null	0.514171	0.103971	Null
654	chr18:61934531-61934630	NA_33	no	1.37664	82.75	1.46104	83.76	-1.16344	51.07	-1.43533	41.91	0.861439	-0.184026	-1.08973	-1.42823	-0.464182	-0.0798396	-0.582811	-0.574977	1.41884	-1.29938	NO	0.338707	-1.25898		-0.272011	-0.578894		-2.71822	2.14137614219436e-09	Down	-1.29081	3.83533812148645e-06	Down
655	chr19:3066556-3066627	n-Tl3|chr19_2_tRNALeu_AAG+	yes	-0.00120522	100	0.0112964	100	0.281577	100	0.524892	100	0.0845428	0.0421057	0.308592	0.410364	0.149381	-0.0362933	0.644673	0.281273	0.0050456	0.403235	YES	0.0633243	0.359478	YES	0.056544	0.462973	YES	0.398189	0.206462	Null	-0.110275	0.786891	Null
656	chr19:3576263-3576335	n-Ta9|chr19_8_tRNAAla_AGC+	yes	4.30083	0	4.32702	0	6.36926	0	6.82528	0	2.33152	1.74978	4.5364	4.58655	2.97029	2.87784	3.328	3.56649	4.31392	6.59727	NO	2.04065	4.56147	NO	2.92406	3.44725	NO	2.28334	5.48715788649406e-08	Up	1.99764	1.57905125897115e-12	Up
657	chr19:3831713-3831812	B2_Mm1a_B2_SINE-	no	2.79301	3.98	3.05212	5.97	1.73482	6.23	2.36766	6.08	0.962841	0.828251	0.749234	0.791721	1.23068	1.49412	0.0700011	0.0718315	2.92256	2.05124	NO	0.895546	0.770477	YES	1.3624	0.0709163	NO	-0.871323	0.00928506	Null	1.16641	3.5466280913542e-05	Up
658	chr19:4820900-4821061	B2_Mm1a_SINE_B2+	yes	2.96077	0	3.20648	0	0.0552793	0	0.296242	0	0.388583	1.19648	-0.407723	0.186203	1.00491	1.31137	0.104744	-0.246431	3.08363	0.17576	NO	0.792533	-0.11076	YES	1.15814	-0.0708437	NO	-2.90787	8.25723208953585e-10	Down	0.325689	0.341953	Null
659	chr19:5038304-5038385	n-Ts20|chr19_711_tRNASer_GCT-	yes	4.18939	0	3.82947	0	6.01565	0	6.28204	0	1.78099	1.06446	4.02475	4.16589	2.5764	2.19634	2.98333	3.42029	4.00943	6.14885	NO	1.42273	4.09532	NO	2.38637	3.20181	NO	2.13942	1.46428952864239e-07	Up	1.85716	3.17958645555336e-11	Up
660	chr19:5786771-5786870	B2_Mm2_B2_SINE-	no	0.429138	0	0.724035	0	1.91193	0	2.3644	0	-0.635952	0.252729	0.36171	0.690715	-0.298966	0.41059	-0.0309903	-0.0500506	0.576586	2.13816	NO	-0.191612	0.526212	YES	0.0558116	-0.0405205	YES	1.56158	1.91656640105995e-05	Up	0.814156	0.00537719	Null
661	chr19:7570905-7571004	B2_Mm1a_B2_SINE-	no	0.618711	0	0.14732	0	3.23329	0	3.78668	0	0.0242035	0.203432	1.62233	1.82701	0.201872	0.25846	1.36671	1.17741	0.383015	3.50999	NO	0.113818	1.72467	NO	0.230166	1.27206	YES	3.12697	5.7077406069471e-10	Up	0.568958	0.0676572	Null
662	chr19:7573070-7573169	NA_34	no	0.227758	0	0.00996028	0	2.20545	0	2.83299	0	-0.358886	0.192488	0.939444	0.700733	0.0602588	-0.234929	0.373699	0.664622	0.118859	2.51922	NO	-0.083199	0.820089	YES	-0.0873351	0.519161	YES	2.40037	3.90038904501047e-08	Up	0.296792	0.390732	Null
663	chr19:12076726-12076798	n-Tf6|chr19_106_tRNAPhe_GAA+	yes	4.74508	0	4.43222	0	2.01358	0	2.66575	0	2.41386	1.87705	0.576757	0.974658	3.03504	3.18392	0.103063	0.652224	4.58865	2.33966	NO	2.14545	0.775707	NO	3.10948	0.377644	NO	-2.24899	1.28949748218783e-07	Down	1.36209	9.88493712476931e-07	Up
664	chr19:12080529-12080601	n-Tk29|chr19_107_tRNALys_TTT+	yes	4.10741	0	4.82708	0	5.87457	0	6.34435	0	1.9247	2.35303	4.02642	3.91366	2.26053	2.69421	2.6538	2.71435	4.46725	6.10946	NO	2.13887	3.97004	NO	2.47737	2.68407	NO	1.64221	2.05106063783486e-05	Up	1.62447	4.42052231589197e-09	Up
665	chr19:12083035-12083107	n-Tf2|chr19_108_tRNAPhe_GAA+	yes	1.57958	0	0.84504	0	4.87773	0	5.57331	0	0.420443	0.41377	3.33934	3.28056	0.796868	0.102041	2.29487	2.36124	1.21231	5.22552	NO	0.417107	3.30995	NO	0.449455	2.32805	NO	4.01321	3.14041340392405e-11	Up	1.01424	0.000366522	Up
666	chr19:12084186-12084258	n-Tk30|chr19_639_tRNALys_TTT-	yes	4.3879	0	4.78191	0	6.53017	0	7.11608	0	2.30369	2.63261	4.53566	4.44368	3.20071	3.53077	3.58153	3.76619	4.58491	6.82313	NO	2.46815	4.48967	NO	3.36574	3.67386	NO	2.23822	1.31996161415935e-07	Up	1.71339	6.97954428715103e-10	Up
667	chr19:12085576-12085658	n-Tl26|chr19_638_tRNALeu_TAA-	yes	4.30652	0	4.34006	0	6.32655	0	6.81242	0	2.0887	1.78402	4.20424	4.25065	2.65187	2.80511	3.19295	3.32335	4.32329	6.56948	NO	1.93636	4.22744	NO	2.72849	3.25815	NO	2.2462	7.39729880988729e-08	Up	1.76142	2.5051697897467e-10	Up
668	chr19:12086078-12086163	n-Tr21|chr19_637_tRNAArg_TCT_I-	yes	4.38153	0	4.44082	0	6.00815	0	6.44232	0	2.21563	1.77623	3.98408	4.09187	2.47586	2.53757	2.85159	2.97962	4.41118	6.22524	NO	1.99593	4.03798	NO	2.50671	2.9156	NO	1.81406	1.85341265490501e-06	Up	1.63316	3.63660553442843e-09	Up
669	chr19:12086421-12086493	n-Tv21|chr19_109_tRNAVal_TAC+	yes	4.86183	0	4.94827	0	6.33692	0	6.70191	0	2.63773	2.26141	4.42457	4.54364	2.84914	2.8361	3.28912	3.43497	4.90505	6.51941	NO	2.44957	4.4841	NO	2.84262	3.36205	NO	1.61436	9.02798793878e-06	Up	1.51511	4.33728144835117e-08	Up
670	chr19:12086756-12086828	n-Tv22|chr19_110_tRNAVal_TAC+	yes	3.4111	0	3.3707	0	5.37369	0	5.99859	0	1.21216	1.03491	3.48015	3.61236	1.49172	1.47208	2.38001	2.71839	3.3909	5.68614	NO	1.12354	3.54626	NO	1.4819	2.5492	NO	2.29523	7.29758665915239e-08	Up	1.35542	1.11242520207716e-06	Up
671	chr19:23195036-23195211	B1_Mus1_SINE_Alu+	yes	2.85306	0	2.73865	0	0.742979	0	0.9729	0	1.19566	0.473636	0.107877	0.00538602	1.49859	1.39904	0.130878	-0.132079	2.79585	0.857939	NO	0.834649	0.0566315	YES	1.44881	-0.000600621	NO	-1.93791	5.11562271397219e-07	Down	0.671395	0.025981	Null
672	chr19:30019652-30019751	B2_Mm1a_B2_SINE+	no	1.12875	13.24	0.907371	10.86	3.7388	6.04	4.3253	7.45	0.0119018	0.160666	2.36436	2.37725	0.312759	0.208644	1.50737	1.42633	1.01806	4.03205	NO	0.0862841	2.3708	NO	0.260701	1.46685	YES	3.01399	8.25723208953585e-10	Up	1.07837	0.000139349	Up
673	chr19:32703343-32703442	B2_Mm2_B2_SINE+	no	2.1344	0	1.22659	0	0.995196	0	1.48718	0	0.51616	-0.0723044	0.471761	0.226191	0.698982	0.19914	0.697512	0.603818	1.6805	1.24119	NO	0.221928	0.348976	YES	0.449061	0.650665	YES	-0.439311	0.218887	Null	-0.0745555	0.861316	Null
674	chr19:38227174-38227273	B2_Mm2_B2_SINE+	no	1.90945	0	2.08235	0	0.596621	0	0.687525	0	0.607283	0.567599	-0.0639346	0.258935	0.997164	0.883727	0.0719687	0.548179	1.9959	0.642073	NO	0.587441	0.0975001	YES	0.940445	0.310074	YES	-1.35382	7.74508874460963e-05	Down	0.140431	0.718304	Null
675	chr19:57478665-57478829	B2_Mm1a_SINE_B2-	yes	2.68614	0	2.55192	0	2.28065	0	2.85853	0	1.01682	0.219196	0.801649	1.09186	1.05387	1.00422	0.337317	0.358043	2.61903	2.56959	NO	0.61801	0.946754	YES	1.02905	0.34768	YES	-0.0494406	0.897795	Null	1.01011	0.000388471	Up
676	chrX:13436292-13436363	n-Tq11|chrX_936_tRNAGln_TTG-	yes	-0.239052	0	0.228165	0	0.0367416	0	0.347081	0	-0.354925	0.0542703	0.154696	-0.0829148	-0.089745	0.00711475	-0.115704	-0.132779	-0.00544337	0.191912	YES	-0.150327	0.0358905	YES	-0.0413151	-0.124242	YES	0.197355	0.571527	Null	0.269144	0.442903	Null
677	chrX:14279742-14279813	n-Tp13|chrX_931_tRNAPro_TGG-	yes	-0.189566	0	-0.181254	7.69	-0.0276894	0	-0.0611889	15.78	-0.227327	-0.159841	0.684866	-0.0988489	-0.0897664	-0.0855817	-0.00136456	0.293929	-0.18541	-0.0444392	YES	-0.193584	0.293008	YES	-0.087674	0.146282	YES	0.140971	0.678933	Null	0.252636	0.477255	Null
678	chrX:30328583-30328682	L1Md_T_L1_LINE+	no	1.8911	95.63	1.96732	93.47	-0.144603	63.83	-0.127489	80.75	1.74634	0.468426	0.057036	-0.0925536	0.18485	0.0418752	0.0276952	-0.142244	1.92921	-0.136046	NO	1.10738	-0.0177588		0.113363	-0.0572746		-2.06525	1.6881088222514e-07	Down	-0.954505	0.000870255	Down
679	chrX:41235030-41235129	L1Md_A_L1_LINE+	no	1.95507	99.52	2.00463	98.97	-0.267434	100	-0.11982	96.43	1.82441	0.354612	0.142276	0.130293	0.27015	0.159448	0.132684	0.0785542	1.97985	-0.193627	NO	1.08951	0.136284		0.214799	0.105619		-2.17348	7.87202860772172e-08	Down	-0.844047	0.00375502	Down
680	chrX:53840716-53840788	n-Ta2|chrX_159_tRNAAla_AGC+	yes	-0.330512	0	0.0870806	0	-0.187183	0	-0.589165	0	-0.509225	0.143889	-0.449303	-0.342652	-0.418649	0.17037	-0.487577	-0.424421	-0.121716	-0.388174	YES	-0.182668	-0.395978	YES	-0.12414	-0.455999	YES	-0.266458	0.428741	Null	0.11855	0.770366	Null
681	chrX:100824407-100824506	B2_Mm2_B_SINE2+_and_PB1D10_Alu_SINE+	no	0.871471	0	1.41289	0	3.64402	0	4.09596	0	0.0888042	0.263491	2.44789	2.04356	0.255972	0.693995	1.27987	1.69996	1.14218	3.86999	NO	0.176148	2.24573	NO	0.474984	1.48992	YES	2.72781	5.21575407689184e-09	Up	1.05465	0.00020053	Up
682	chrX:108490826-108490898	n-Tr13|chrX_321_tRNAArg_CCT+	yes	0.394104	0	0.415485	0	0.73328	0	0.568207	0	-0.0920366	0.210227	-0.0581856	0.374616	-0.303965	0.102472	-0.0260154	0.675376	0.404795	0.650744	YES	0.0590953	0.158215	YES	-0.100747	0.32468	YES	0.245949	0.448182	Null	-0.326307	0.341069	Null
683	chrX:112119773-112119872	L1Md_T_L1_LINE+	no	2.19067	100	2.13666	100	-0.37053	100	-0.271969	100	2.0527	0.240768	-0.0452846	-0.087278	0.273213	0.0918132	0.0116898	-0.0823718	2.16367	-0.32125	NO	1.14673	-0.0662813		0.182513	-0.035341		-2.48492	8.37350200068149e-09	Down	-0.995161	0.000483326	Down
684	chrX:132730271-132730343	n-Tk19|chrX_643_tRNALys_CTT-	yes	0.575339	0	0.00812928	0	1.05046	0	0.848455	0	0.33005	0.065584	0.516397	0.646278	0.560313	-0.0359416	0.468783	0.409364	0.291734	0.949458	YES	0.197817	0.581337	YES	0.262186	0.439073	YES	0.657725	0.0441177	Null	0.206633	0.575469	Null
685	chrX:132892141-132892212	n-Ta31|chrX_363_tRNAAla_TGC+	yes	0.0682988	0	-0.104635	0	0	0	0	0	0.0550702	-0.0208668	0	0	-0.0540649	-0.221358	0	0	-0.0181681	0	YES	0.0171017	0	YES	-0.137711	0	YES	0.0181681	0.96361	Null	-0.154813	0.692303	Null
686	chrX:132902260-132902331	n-Ta23|chrX_364_tRNAAla_CGC+	yes	0.248064	20	-0.0144992	3.7	0.210487	60	0.0214045	100	0.536392	0.153505	0.047448	0.0298546	0.0349775	-0.0198194	0	0.0625357	0.116783	0.115946	YES	0.344949	0.0386513	YES	0.00757906	0.0312679	YES	-0.000836784	0.997528	Null	-0.329986	0.335432	Null
687	chrX:132913905-132913976	n-Ta26|chrX_640_tRNAAla_CGC-	yes	-0.104367	100	0.0978976	100	0.0736278	100	0.0972777	100	-0.200368	0.235586	0.108378	0.0591039	-0.134984	0.195929	0.135781	0.0211479	-0.00323464	0.0854527	YES	0.0176091	0.0837409	YES	0.0304726	0.0784645	YES	0.0886873	0.805427	Null	0.0181399	0.977245	Null
688	chrX:132915286-132915357	n-Ta35|chrX_366_tRNAAla_TGC+	yes	-0.392284	0	0.0849246	36	0	0	0	0	-0.0641539	0.4121	0	0	0.244259	0.308959	0	0	-0.15368	0	YES	0.173973	0	YES	0.276609	0	YES	0.15368	0.661951	Null	0.102636	0.803577	Null
689	chrX:132930061-132930132	n-Ta25|chrX_639_tRNAAla_CGC-	yes	-0.104367	100	0.0978976	100	0.0736278	100	0.0972777	100	-0.200368	0.235586	0.108378	0.0591039	-0.150455	0.195929	0.135781	0.0211479	-0.00323464	0.0854527	YES	0.0176091	0.0837409	YES	0.022737	0.0784645	YES	0.0886873	0.805427	Null	0.0104044	0.989961	Null
690	chrX:132931443-132931514	n-Ta36|chrX_368_tRNAAla_TGC+	yes	0.0533902	0	-0.070187	36	0	0	0	0	0.247208	-0.133013	0	0	0.0174018	-0.0188349	0	0	-0.00839837	0	YES	0.0570976	0	YES	-0.000716551	0	YES	0.00839837	0.984961	Null	-0.0578142	0.893873	Null
691	chrX:132936407-132936478	n-Ta24|chrX_369_tRNAAla_CGC+	yes	0.0173328	63.99	0.36174	38.77	0	0	0	0	0.299256	0.100955	0.047448	0	0.0165115	0.415221	0	0	0.189537	0	YES	0.200105	0.023724	YES	0.215866	0	YES	-0.189537	0.577761	Null	0.0394846	0.934465	Null
692	chrX:132964904-132964975	n-Ta33|chrX_637_tRNAAla_TGC-	yes	0.102954	82.6	0.22788	60	0.428762	26.08	0.373363	77.27	-0.0398596	-0.170849	0.0960497	0.47092	0.259837	0.0262012	0.195344	-0.120437	0.165417	0.401062	YES	-0.105354	0.283485	YES	0.143019	0.0374535	YES	0.235645	0.467695	Null	0.494405	0.121225	Null
693	chrX:133088264-133088335	n-Ta32|chrX_371_tRNAAla_TGC+	yes	0.0782198	73.33	0.148578	79.48	0.184031	100	0.507429	100	0.0404588	0.029003	0.0319341	0.429035	0.164399	-0.0988195	0.282161	0.305005	0.113399	0.34573	YES	0.0347309	0.230485	YES	0.0327897	0.293583	YES	0.232331	0.479868	Null	-0.0650394	0.878387	Null
694	chrX:133102404-133102475	n-Ta21|chrX_636_tRNAAla_CGC-	yes	-0.133477	70.37	-0.25933	45.45	0.60748	15.99	0.559074	36.84	-0.112984	0.0948749	0.335608	0.29866	0.167553	-0.0614451	0.366267	0.586945	-0.196404	0.583277	YES	-0.0090547	0.317134	YES	0.053054	0.476606	YES	0.779681	0.013158	Null	-0.0973633	0.815916	Null
695	chrX:133103785-133103856	n-Ta37|chrX_372_tRNAAla_TGC+	yes	0.173045	0	0.149862	0	-0.0236103	5.88	-0.136588	0	-0.180286	0.338344	0.0685557	-0.470464	-0.10498	0.0411361	-0.314702	-0.0682807	0.161453	-0.0800993	YES	0.0790291	-0.200954	YES	-0.0319219	-0.191491	YES	-0.241553	0.455025	Null	-0.120414	0.76733	Null
696	chrX:133104302-133104374	n-Ta20|chrX_373_tRNAAla_CGC+	yes	0.0543026	28.57	0.0821474	17.24	0.230253	57.14	0.181488	66.66	0.0603181	-0.26503	0.480899	0.313898	0.0198801	0.161141	-0.0263311	0.178836	0.068225	0.20587	YES	-0.102356	0.397398	YES	0.0905104	0.0762523	YES	0.137645	0.68552	Null	0.514013	0.103971	Null
697	chrX:133124904-133124975	n-Ta30|chrX_375_tRNAAla_TGC+	yes	-0.251055	0	-0.0978295	0	0.494062	0	0.442258	0	-0.130477	0.0390142	0.586432	0.586713	-0.168319	-0.331576	0.32627	0.389674	-0.174442	0.46816	YES	-0.0457316	0.586572	YES	-0.249947	0.357972	YES	0.642602	0.0399754	Null	0.0243847	0.968255	Null
698	chrX:150940466-150940565	L1Md_F2_L1_LINE+	no	2.00755	10.56	2.17997	11.93	-1.38884	17.8	-1.25651	23.84	2.22677	0.0560231	-0.0158468	0.318709	0.286923	0.131631	0.343656	0.0265072	2.09376	-1.32267	NO	1.1414	0.151431		0.209277	0.185081		-3.41643	5.74693573263871e-11	Down	-0.965771	0.000742752	Down
699	chrX:157204042-157204114	n-Tv23|chrX_459_tRNAVal_TAC+	yes	4.60771	0	4.87683	0	5.4934	0	6.17121	0	2.4574	2.195	3.53281	3.82327	3.017	2.9793	2.37347	2.63937	4.74227	5.83231	NO	2.3262	3.67804	NO	2.99815	2.50642	NO	1.09004	0.00161975	Up	1.84357	4.3964455549538e-11	Up
700	chrX:157573066-157573148	n-Tl23|chrX_462_tRNALeu_TAA+	yes	0.0355739	6.67	0.189414	8.53	0.329321	4.22	0.478591	9.58	0.0676676	-0.00398678	0.345229	0.503871	0.301795	0.272631	0.548346	0.245852	0.112494	0.403956	YES	0.0318404	0.42455	YES	0.287213	0.397099	YES	0.291462	0.365129	Null	0.282824	0.418758	Null
701	chrX:163347665-163347746	n-Ts3|chrX_493_tRNASer_AGA-	yes	-0.394816	0	-0.324166	0	-0.234045	0	-0.122919	0	-0.474061	-0.0500827	-0.499138	-0.36101	-0.515625	-0.0414899	-0.566913	-0.541699	-0.359491	-0.178482	YES	-0.262072	-0.430074	YES	-0.278558	-0.554306	YES	0.181009	0.590535	Null	0.107746	0.793439	Null
Table S3. Loci occupied by pol III in mouse liver and mouse Hepa1-6 cells. All tRNA loci as well as Rn5s loci described in Canella et al. 2012, whether or not significantly occupied by POLR3D, as well as all other loci signficantly occupied by POLR3D, are listed. Column A attributes a number to each entry which is constant in all the sheets of the table. The cells labeled in red in this column an…

## Sheet: tRNA
	Locus description			Scores: log2((IP tag counts +30)/(Input tag counts+30))																Mean of scores in biological replicates									LIMMA analysis on POLR3D scores, liver vs hepa			LIMMA analysis on POLR3G/POLR3GL score ratios in liver versus hepa
				POLR3D								POLR3G				POLR3GL				POLR3D			POLR3G			POLR3GL			POLR3D			POLR3G/POLR3GL
Number	Locus position with link (NCBI37/mm9)	Locus annotation	Discussed in Canella et al. 2012 ?	Liver Rep 1 score (cut off = 1.1806)	Liver Rep 1 % score from tags with multiple matches	Liver Rep2 score (cut off = 0.9758)	Liver Rep 2 % score from tags with multiple matches	Hepa 1-6 Rep 1 score (cut off = 1.6897)	Hepa 1-6 Rep 1 % score from tags with multiple matches	Hepa 1-6 Rep2 score (cut off = 1.7737)	Hepa 1-6 Rep 2 % score from tags with multiple matches	Liver Rep 1 score (cut off = 1.2630)	Liver Rep 2 score (cut off = 1.1375)	Hepa 1-6 Rep 1 score (cut off = 1.7737)	Hepa 1-6 Rep 2 score (cut off = 1.6605	Liver Rep 1 score (cut off = 1.0931)	Liver Rep 2 score (cut off = 1.0238)	Hepa 1-6 Rep 1 score (cut off = 1.6457)	Hepa 1-6 Rep 2 score (cut off = 1.6308)	Liver mean score (cut off = 1.0782)	Hepa 1-6 mean score (cut off = 1.7317)	Below cut off in both POLR3D liver and POLR3D Hepa 1-6 scores?	Liver mean score (cut off = 1.2003)	Hepa 1-6 mean score cut off = 1.7171)	Below cut off in both POLR3G liver and POLR3G Hepa 1-6 scores?	Liver mean score (cut off = 1.0585)	Hepa 1-6 mean score (cut off = 1.6382)	Below cut off in both POLR3GL liver and POLR3GL Hepa 1-6 scores?	LogFC POLR3D Hepa 1-6 versus liver	adj.P.Val POLR3D Hepa 1-6 versus liver	POLR3D Up/Down in Hepa 1-6 versus liver	LogFC POLR3G/POLR3GL ratio in Hepa 1-6 versus liver	adj.P.Val POLR3G/POLR3GL ratio	POLR3G/POLR3GL ratio Up/Down in Hepa 1-6 versus liver
2	chr1:34491657-34491728	n-Te21|chr1_1547_tRNAGlu_TTC-	yes	4.5145	0	4.37848	0	5.7383	0	6.23046	0	2.22882	1.47038	3.73881	3.82479	2.54953	2.40373	2.50502	2.79746	4.44649	5.98438	NO	1.8496	3.7818	NO	2.47663	2.65124	NO	1.53789	2.22858718501428e-05	Up	1.75759	2.7053283949042e-10	Up
4	chr1:74863321-74863391	n-Tg11|chr1_1392_tRNAGly_GCC-	yes	2.56038	0	2.30881	0	3.58684	0	4.24901	0	0.361388	0.147082	2.08678	2.08389	0.767638	0.899552	1.18416	1.42323	2.4346	3.91792	NO	0.254235	2.08533	YES	0.833595	1.30369	YES	1.48333	5.34815032993031e-05	Up	1.361	1.00193256916601e-06	Up
5	chr1:78294370-78294441	n-Tp1|chr1_284_tRNAPro_AGG+	yes	-0.287126	0	-0.0992368	0	0.324743	0	0.114568	0	0.491061	0.172828	-0.124864	0.323945	-0.115999	-0.312669	0.157695	0.174883	-0.193181	0.219655	YES	0.331945	0.0995406	YES	-0.214334	0.166289	YES	0.412837	0.190623	Null	-0.613027	0.0459963	Null
6	chr1:112801324-112801396	n-Tk7|chr1_1268_tRNALys_CTT-	yes	-0.450086	0	-0.0880061	0	0.282616	0	-0.0690528	0	-0.727159	0.090996	0.272947	0.0228113	-0.489073	-0.0311259	0.407306	0.311799	-0.269046	0.106782	YES	-0.318082	0.147879	YES	-0.260099	0.359553	YES	0.375827	0.246607	Null	-0.153691	0.695093	Null
9	chr1:134930539-134930611	n-Tk26|chr1_485_tRNALys_TTT+	yes	3.86955	0	4.3536	0	5.53519	0	6.3387	0	1.59243	1.91997	3.75224	3.80298	2.02856	2.57354	2.63885	2.90869	4.11158	5.93695	NO	1.7562	3.77761	NO	2.30105	2.77377	NO	1.82537	5.94742989595476e-06	Up	1.54869	2.15745724749372e-08	Up
10	chr1:134930904-134930976	n-Tk25|chr1_1184_tRNALys_TTT-	yes	2.57759	0	2.88801	0	5.58332	0	6.25234	0	0.65282	0.929074	3.80786	3.93981	1.07619	1.41384	2.82332	3.01368	2.7328	5.91783	NO	0.790947	3.87384	YES	1.24502	2.9185	NO	3.18502	4.20055997941708e-10	Up	1.40941	3.85343641424543e-07	Up
11	chr1:155305794-155305866	n-Ti13|chr1_583_tRNAIle_TAT+	yes	0.178288	0	-0.0116857	0	0.456366	0	0.882025	0	0.853824	-0.215355	0.804755	0.534073	0.313548	0.0816316	0.680129	0.432002	0.0833012	0.669196	YES	0.319235	0.669414	YES	0.19759	0.556065	YES	0.585894	0.0676451	Null	-0.00829622	0.990271	Null
12	chr1:167571765-167571836	n-Tp2|chr1_672_tRNAPro_AGG+	yes	4.3144	0	4.47851	0	5.63085	0	5.90136	0	1.83188	1.82343	4.13469	3.98226	2.57388	2.44762	2.65519	2.76743	4.39646	5.76611	NO	1.82765	4.05848	NO	2.51075	2.71131	NO	1.36965	7.46603793972756e-05	Up	2.03027	9.01463082956122e-13	Up
13	chr1:167572402-167572473	n-Tp8|chr1_1022_tRNAPro_CGG-	yes	4.18633	0	4.66853	0	4.71083	0	5.03082	0	1.87492	1.82166	3.49262	3.40835	2.40079	2.48188	2.12428	2.48213	4.42743	4.87082	NO	1.84829	3.45048	NO	2.44134	2.30321	NO	0.44339	0.173555	Null	1.74032	3.88699457967984e-10	Up
15	chr1:172964073-172964146	n-Tn6|chr1_1006_tRNAAsn_GTT-	yes	5.00446	0	5.17973	0	6.42855	0	6.65095	0	2.64349	2.29598	4.61113	4.67474	2.93674	3.29444	3.5097	3.79032	5.09209	6.53975	NO	2.46973	4.64293	NO	3.11559	3.65001	NO	1.44766	3.59058256935781e-05	Up	1.63878	3.24021938058743e-09	Up
16	chr1:172967160-172967231	n-Td4|chr1_1005_tRNAAsp_GTC-	yes	4.43274	0	4.53474	0	6.30309	0	6.89242	0	2.22103	2.16996	4.63008	4.47521	3.06589	2.95233	3.2661	3.21065	4.48374	6.59775	NO	2.19549	4.55265	NO	3.00911	3.23837	NO	2.11401	2.3872130382356e-07	Up	2.12789	1.25655709185952e-13	Up
17	chr1:172968128-172968199	n-Tg21|chr1_1004_tRNAGly_TCC-	yes	4.46849	0	4.91627	0	5.69767	0	6.31278	0	2.27299	2.2865	3.92368	3.76477	2.69958	2.97604	2.338	2.58845	4.69238	6.00523	NO	2.27974	3.84423	NO	2.83781	2.46323	NO	1.31284	0.000256528	Up	1.93906	5.07527702790515e-12	Up
18	chr1:172968745-172968827	n-Tl15|chr1_698_tRNALeu_CAG+	yes	4.97625	0	5.56284	0	6.511	0	6.99107	0	2.45427	2.47588	4.64283	4.63224	3.11523	3.38281	3.35079	3.6525	5.26955	6.75103	NO	2.46507	4.63754	NO	3.24902	3.50165	NO	1.48148	6.11259859106079e-05	Up	1.91984	7.60244681178187e-12	Up
19	chr1:172975116-172975186	n-Tg12|chr1_699_tRNAGly_GCC+	yes	5.00977	0	5.09649	0	0.646608	0	0.702903	0	2.48191	2.19735	0.093385	0.322979	3.23286	3.27944	0.374135	0.180019	5.05313	0.674756	NO	2.33963	0.208182	NO	3.25615	0.277077	NO	-4.37837	9.06858747460922e-13	Down	0.847619	0.00359043	Up
20	chr1:172994295-172994366	n-Te5|chr1_1002_tRNAGlu_CTC-	yes	2.23688	77.58	1.68888	70.66	2.34276	62.08	2.77681	63.78	0.610192	-0.213703	0.434334	0.678448	0.529898	0.228774	0.140678	0.472143	1.96288	2.55978	NO	0.198245	0.556391	YES	0.379336	0.30641	YES	0.596905	0.0718752	Null	0.431072	0.187698	Null
21	chr1:172994830-172994901	n-Tg20|chr1_1001_tRNAGly_TCC-	yes	2.11651	57.16	1.75281	53.22	1.4911	33.17	1.91783	34.18	0.264337	-0.203978	-0.220907	0.00355192	0.24143	0.0717979	-0.0972499	-0.0674436	1.93466	1.70446	NO	0.0301793	-0.108677	YES	0.156614	-0.0823467	YES	-0.230197	0.497876	Null	0.100104	0.809819	Null
22	chr1:172995489-172995560	n-Td3|chr1_1000_tRNAAsp_GTC-	yes	1.74011	33.03	1.62175	34.07	1.96824	98.19	2.31364	99.32	0.0480266	0.165534	0.311462	0.584053	0.257885	0.385993	0.0868936	0.158367	1.68093	2.14094	NO	0.10678	0.447757	YES	0.321939	0.122631	YES	0.460012	0.145896	Null	0.540285	0.0856732	Null
23	chr1:172996115-172996197	n-Tl18|chr1_701_tRNALeu_CAG+	yes	0.495827	48.78	0.0333621	45.02	2.82234	54.14	3.18282	58.98	-0.102482	-0.793593	0.978538	1.26212	-0.328144	-0.591936	0.393682	0.890804	0.264594	3.00258	NO	-0.448038	1.12033	YES	-0.46004	0.642243	YES	2.73798	3.47522690919968e-09	Up	0.466082	0.148045	Null
24	chr1:172996762-172996832	n-Tg17|chr1_702_tRNAGly_GCC+	yes	2.26516	63.01	1.86331	57.14	4.43491	99.68	5.00405	99.48	0.674794	-0.0993037	2.17504	2.75068	0.766312	0.508819	1.45347	1.942	2.06424	4.71948	NO	0.287745	2.46286	YES	0.637565	1.69773	NO	2.65525	7.90808898903982e-09	Up	1.11495	8.1246482241712e-05	Up
25	chr1:173001923-173001994	n-Te8|chr1_999_tRNAGlu_CTC-	yes	2.37282	95.56	1.67062	95.56	2.57485	98.25	3.02005	99.75	0.45155	-0.28023	0.427154	0.735863	0.542447	0.128936	0.04197	0.583092	2.02172	2.79745	NO	0.0856604	0.581508	YES	0.335691	0.312531	YES	0.775727	0.0228434	Null	0.519008	0.100586	Null
26	chr1:173002465-173002536	n-Tg24|chr1_998_tRNAGly_TCC-	yes	2.20368	100	1.80645	100	1.31468	100	1.67032	100	0.329269	-0.243133	-0.0355409	0.171725	0.394418	0.243653	0.164805	0.162099	2.00507	1.4925	NO	0.0430681	0.0680919	YES	0.319036	0.163452	YES	-0.512566	0.112302	Null	0.180608	0.6339	Null
27	chr1:173003124-173003195	n-Td7|chr1_997_tRNAAsp_GTC-	yes	1.16647	100	0.92985	100	2.23707	100	2.69347	100	-0.224999	-0.158842	0.439582	0.728123	-0.14243	0.134003	0.226012	0.264652	1.04816	2.46527	NO	-0.19192	0.583852	YES	-0.00421324	0.245332	YES	1.41711	6.44260674592753e-05	Up	0.526228	0.0951606	Null
28	chr1:173003750-173003832	n-Tl19|chr1_703_tRNALeu_CAG+	yes	0.59272	88.4	-0.0374818	76.07	2.54841	99.87	3.04457	100	-0.0350394	-0.810178	0.664821	1.09668	-0.224991	-0.536322	0.220511	0.76946	0.277619	2.79649	NO	-0.422609	0.880751	YES	-0.380656	0.494985	YES	2.51887	2.61316591491652e-08	Up	0.427718	0.19138	Null
29	chr1:173004433-173004503	n-Tg18|chr1_704_tRNAGly_GCC+	yes	2.04182	60.57	1.42347	57.66	4.17984	82.12	4.72737	83.55	0.472891	-0.155386	1.97115	2.52771	0.572591	0.188088	1.35075	1.71723	1.73265	4.45361	NO	0.158753	2.24943	YES	0.380339	1.53399	YES		7.90808898903982e-09	Up	0.937019	0.00110813	Up
30	chr1:173009537-173009608	n-Te7|chr1_996_tRNAGlu_CTC-	yes	2.32842	84.82	1.72582	83.14	2.45494	100	2.89777	99.91	0.435935	-0.343431	0.389074	0.646317	0.436917	0.180822	0.0303962	0.529756	2.02712	2.67635	NO	0.0462516	0.517695	YES	0.30887	0.280076	YES	0.649233	0.0523025	Null	0.500237	0.115874	Null
31	chr1:173010079-173010150	n-Tg23|chr1_995_tRNAGly_TCC-	yes	2.20368	100	1.80645	100	1.31468	100	1.67032	100	0.329269	-0.243133	-0.0355409	0.171725	0.394418	0.243653	0.164805	0.162099	2.00507	1.4925	NO	0.0430681	0.0680919	YES	0.319036	0.163452	YES	-0.512566	0.112302	Null	0.180608	0.6339	Null
32	chr1:173010738-173010809	n-Td6|chr1_994_tRNAAsp_GTC-	yes	1.16647	100	0.92985	100	2.23707	100	2.69347	100	-0.224999	-0.158842	0.439582	0.728123	-0.14243	0.134003	0.226012	0.264652	1.04816	2.46527	NO	-0.19192	0.583852	YES	-0.00421324	0.245332	YES	1.41711	6.44260674592753e-05	Up	0.526228	0.0951606	Null
33	chr1:173011364-173011446	n-Tl20|chr1_705_tRNALeu_CAG+	yes	0.59969	83.61	0.0750608	78.9	2.46722	96.72	2.93474	97.3	-0.0323752	-0.839844	0.577342	1.05663	-0.413872	-0.399861	0.299987	0.692359	0.337375	2.70098	NO	-0.43611	0.816987	YES	-0.406867	0.496173	YES	2.3636	5.64173988314235e-08	Up	0.350057	0.305125	Null
34	chr1:173012007-173012077	n-Tg19|chr1_706_tRNAGly_GCC+	yes	1.98124	61.13	1.36334	59.55	4.19279	97.53	4.8252	97.02	0.55992	-0.409301	2.0702	2.49948	0.715772	0.239315	1.35568	1.78724	1.67229	4.50899	NO	0.0753092	2.28484	YES	0.477544	1.57146	YES	2.8367	4.81663655878547e-09	Up	1.11562	8.06133254366679e-05	Up
35	chr1:173031969-173032051	n-Tl21|chr1_993_tRNALeu_CAG-	yes	4.88339	0	4.7533	0	4.4763	0	4.80541	0	2.62937	2.15667	3.31296	3.55306	3.19094	3.02228	2.3805	2.15663	4.81834	4.64086	NO	2.39302	3.43301	NO	3.10661	2.26857	NO	-0.177487	0.60387	Null	1.87803	2.05105348261001e-11	Up
36	chr1:173032502-173032573	n-Td5|chr1_707_tRNAAsp_GTC+	yes	3.38058	0	3.84672	0	5.19746	0	5.493	0	1.37188	1.43364	3.20404	3.43602	1.7737	2.10105	2.11144	2.46729	3.61365	5.34523	NO	1.40276	3.32003	NO	1.93737	2.28937	NO	1.73158	4.74847708669167e-06	Up	1.56528	1.5478083542778e-08	Up
37	chr1:173032887-173032958	n-Tg22|chr1_708_tRNAGly_TCC+	yes	4.81343	0	4.98573	0	5.97494	0	6.4022	0	2.64583	2.37815	4.01195	4.0308	2.9171	2.96902	2.63097	2.93374	4.89958	6.18857	NO	2.51199	4.02137	NO	2.94306	2.78236	NO	1.28899	0.000184958	Up	1.67009	1.66885789125233e-09	Up
38	chr1:173033174-173033245	n-Te6|chr1_709_tRNAGlu_CTC+	yes	4.86993	0	4.87045	0	5.98838	0	6.4434	0	2.70218	2.04938	4.09248	4.00577	3.04602	2.8164	2.62036	2.87076	4.87019	6.21589	NO	2.37578	4.04912	NO	2.93121	2.74556	NO	1.3457	0.000110729	Up	1.85899	3.07871578924606e-11	Up
39	chr1:173041574-173041646	n-Tv14|chr1_710_tRNAVal_CAC+	yes	3.944	0	4.04317	0	3.77482	0	4.52351	0	1.89608	1.62589	2.6864	2.67894	2.24931	2.30783	1.61269	1.47807	3.99358	4.14916	NO	1.76099	2.68267	NO	2.27857	1.54538	NO	0.155582	0.671963	Null	1.65487	2.3511034707151e-09	Up
41	chr1:173599570-173599642	n-Th1|chr1_717_tRNAHis_ATG+	yes	-0.267609	10.58	0.0450456	7.55	-0.156771	9.72	-0.248278	8.91	-0.492337	0.157661	0.156004	0.202107	-0.214437	0.30939	-0.41161	0.0934343	-0.111281	-0.202524	YES	-0.167338	0.179055	YES	0.0474765	-0.159088	YES	-0.091243	0.801736	Null	0.552958	0.0773514	Null
42	chr1:175320460-175320533	n-Tr20|chr1_730_tRNAArg_TCT+	yes	-0.429032	0	-0.417818	0	4.17829	0	4.72301	0	-0.464026	-0.178568	2.19108	2.35846	-0.477998	-0.251298	1.22592	1.61261	-0.423425	4.45065	NO	-0.321297	2.27477	NO	-0.364648	1.41926	YES	4.87408	4.70307837872257e-13	Up	0.81216	0.00548825	Null
44	chr1:183986139-183986220	n-Ts15|chr1_791_tRNASer_GCT+	yes	-0.144226	0	-0.23488	0	-0.73092	0	-0.365746	0	-0.588946	-0.00525802	-0.173404	-0.831557	-0.109855	-0.182224	-0.0186249	-0.804836	-0.189553	-0.548333	YES	-0.297102	-0.502481	YES	-0.146039	-0.411731	YES	-0.35878	0.263062	Null	0.0603129	0.88831	Null
45	chr1:190765285-190765358	n-Tn3|chr1_814_tRNAAsn_GTT+	yes	-0.315238	2.6	0.165617	0.5	-0.234329	4.48	-0.618337	9.51	-0.339909	0.518329	0.286498	0.0498586	-0.379693	0.0609621	-0.0840426	-0.163038	-0.0748109	-0.426333	YES	0.0892102	0.168178	YES	-0.159365	-0.12354	YES	-0.351522	0.290776	Null	0.0431429	0.925492	Null
47	chr2:18508671-18508744	n-Tn9|chr2_1947_tRNAAsn_GTT-	yes	4.70286	0	4.75192	0	6.24791	0	6.83298	0	2.41034	1.79515	4.27461	4.21982	2.73598	2.85258	3.13305	3.1555	4.72739	6.54044	NO	2.10275	4.24721	NO	2.79428	3.14428	NO	1.81305	2.5586863880029e-06	Up	1.79447	1.23709249952033e-10	Up
50	chr2:57034489-57034560	n-Ta27|chr2_263_tRNAAla_CGC+	yes	4.51317	0	5.24963	0	6.22527	0	6.89819	0	2.34798	2.48274	4.27302	4.29855	2.89047	3.45119	3.06821	3.27831	4.8814	6.56173	NO	2.41536	4.28578	NO	3.17083	3.17326	NO	1.68033	2.23696387791012e-05	Up	1.86799	2.54662176682056e-11	Up
51	chr2:57034805-57034875	n-Tg29|chr2_1747_tRNAGly_GCC-	yes	4.26302	0	4.68102	0	6.61929	0	7.42663	0	1.70401	1.76142	4.79195	4.87598	2.3791	2.62623	3.63284	3.60234	4.47202	7.02296	NO	1.73272	4.83397	NO	2.50267	3.61759	NO	2.55094	3.02483445594246e-08	Up	1.98632	2.01293639718532e-12	Up
55	chr2:113929103-113929174	n-Td2|chr2_510_tRNAAsp_GTC+	yes	-0.289498	0	-0.303306	0	-0.588751	0	-0.781453	0	-0.240701	-0.302591	-0.393228	-0.56859	-0.614263	-0.162028	-0.299929	-0.710013	-0.296402	-0.685102	YES	-0.271646	-0.480909	YES	-0.388146	-0.504971	YES	-0.3887	0.21694	Null	-0.0924382	0.824031	Null
57	chr2:118872486-118872567	n-Ts21|chr2_1509_tRNASer_GCT-	yes	5.16131	0	5.58791	0	6.23104	0	6.55998	0	2.93733	2.45906	4.38933	4.4972	3.41979	3.65908	3.26846	3.4322	5.37461	6.39551	NO	2.6982	4.44327	NO	3.53943	3.35033	NO	1.0209	0.0022198	Up	1.93417	5.67286549614185e-12	Up
58	chr2:118881889-118881962	n-Ti12|chr2_1506_tRNAIle_GAT-	yes	0.191846	0	-0.339722	0	-0.476087	0	-0.499332	0	-0.0755614	-0.139849	-0.870867	-0.351772	-0.0898673	-0.00768593	-0.930695	-0.500451	-0.073938	-0.48771	YES	-0.107705	-0.611319	YES	-0.0487766	-0.715573	YES	-0.413772	0.202663	Null	0.163183	0.675151	Null
60	chr2:122201230-122201301	n-Th4|chr2_1432_tRNAHis_GTG-	yes	4.30835	6.21	5.08104	6.1	5.26885	4.37	5.65094	3.42	2.35523	2.54877	3.55839	3.51019	2.69774	3.51265	2.44124	2.84845	4.69469	5.45989	NO	2.452	3.53429	NO	3.1052	2.64484	NO	0.765199	0.0257126	Null	1.54264	2.45069834587661e-08	Up
61	chr2:122203099-122203170	n-Th3|chr2_1431_tRNAHis_GTG-	yes	4.82394	5.14	5.32222	4.77	6.00729	2.88	6.42413	2.2	2.99768	2.67	4.07619	4.20443	3.3893	3.79287	2.89822	3.31746	5.07308	6.21571	NO	2.83384	4.14031	NO	3.59109	3.10784	NO	1.14263	0.000900486	Up	1.78972	1.36612805895216e-10	Up
62	chr2:122203704-122203775	n-Th5|chr2_586_tRNAHis_GTG+	yes	4.93538	0	5.80838	0	6.166	0	6.39892	0	2.81512	3.0067	4.31608	4.44571	3.13126	4.06108	3.27926	3.71969	5.37188	6.28246	NO	2.91091	4.3809	NO	3.59617	3.49947	NO	0.910583	0.00916078	Null	1.56668	1.5153950670589e-08	Up
67	chr3:3123740-3123812	n-Tk1|chr3_1_tRNALys_CTT+	yes	-0.387314	0	-0.0232551	0	0.0115557	0	-0.0476669	0	-0.549153	-0.110779	-0.184696	-0.0443102	-0.0906812	0.290395	-0.416977	-0.0276769	-0.205284	-0.0180556	YES	-0.329966	-0.114503	YES	0.0998569	-0.222327	YES	0.187229	0.583113	Null	0.537647	0.0873496	Null
68	chr3:3149493-3149565	n-Tk9|chr3_2_tRNALys_CTT+	yes	-0.382481	0	-0.166084	0	0.0502109	0	0.0515036	0	-0.616274	0.00640617	-0.0105227	-0.0805951	-0.79383	0.100225	-0.232342	0.242274	-0.274282	0.0508573	YES	-0.304934	-0.0455589	YES	-0.346803	0.00496604	YES	0.32514	0.308163	Null	-0.0923936	0.824031	Null
70	chr3:19527959-19528031	n-Tr3|chr3_1040_tRNAArg_ACG-	yes	4.10328	0	4.46348	0	5.13592	0	5.68594	0	1.76241	1.70034	3.18513	3.36717	2.2476	2.69177	1.98308	2.50235	4.28338	5.41093	NO	1.73138	3.27615	NO	2.46968	2.24272	NO	1.12755	0.00103605	Up	1.77174	1.9984581351666e-10	Up
71	chr3:19528355-19528447	n-Ty1|chr3_27_tRNATyr_GTA_I+	yes	4.29909	0	4.61798	0	5.35779	0	5.81361	0	2.03477	1.84616	3.36584	3.55303	2.31794	2.84578	2.50036	2.61936	4.45853	5.5857	NO	1.94046	3.45944	NO	2.58186	2.55986	NO	1.12717	0.000895784	Up	1.54097	2.51908836168099e-08	Up
72	chr3:19528782-19528870	n-Ty2|chr3_28_tRNATyr_GTA_I+	yes	5.26743	0	5.11092	0	6.32326	0	6.7257	0	2.90144	2.12947	4.33712	4.38895	3.22779	3.11392	3.1803	3.46786	5.18917	6.52448	NO	2.51545	4.36304	NO	3.17085	3.32408	NO	1.3353	0.000117757	Up	1.69435	1.0215733170718e-09	Up
73	chr3:19528995-19529067	n-Ta14|chr3_29_tRNAAla_AGC+	yes	5.32714	0	5.28243	0	6.41126	0	6.80529	0	3.00539	2.36156	4.42832	4.46591	3.41039	3.25096	3.24737	3.51994	5.30478	6.60828	NO	2.68347	4.44711	NO	3.33068	3.38365	NO	1.3035	0.000149497	Up	1.71067	7.2796535543816e-10	Up
74	chr3:24061947-24062029	n-Tl13|chr3_1026_tRNALeu_CAG-	yes	-0.149502	0	-0.171919	0	-0.19708	0	0.351856	0	-0.343909	0.0699297	-0.105302	-0.496507	-0.237646	-0.0030238	0.0715863	-0.273317	-0.160711	0.0773885	YES	-0.13699	-0.300904	YES	-0.120335	-0.100865	YES	0.238099	0.480111	Null	-0.183384	0.628714	Null
76	chr3:30500192-30500264	n-Tv8|chr3_48_tRNAVal_AAC+	yes	5.10162	0	5.44774	0	6.38877	0	6.86649	0	3.02648	2.91748	4.54986	4.51372	3.3465	3.72199	3.23249	3.45769	5.27468	6.62763	NO	2.97198	4.53179	NO	3.53424	3.34509	NO	1.35295	0.000129601	Up	1.74897	3.20450754996254e-10	Up
77	chr3:51162276-51162347	n-Tp17|chr3_92_tRNAPro_TGG+	yes	2.62721	0	2.51676	0	4.78278	0	5.20915	0	0.523471	0.572837	3.01825	3.27547	1.11704	0.917255	2.07169	2.22827	2.57199	4.99597	NO	0.548154	3.14686	YES	1.01715	2.14998	NO	2.42398	1.92284961570193e-08	Up	1.46588	1.2043917004964e-07	Up
78	chr3:51163329-51163400	n-Tp5|chr3_93_tRNAPro_AGG+	yes	3.24452	0	2.69666	0	5.09074	0	5.59605	0	0.741918	1.00219	2.983	3.04779	1.65317	1.01826	1.81673	2.002	2.97059	5.3434	NO	0.872055	3.0154	YES	1.33571	1.90936	NO	2.37281	6.01891077796863e-08	Up	1.56969	1.42942454004871e-08	Up
80	chr3:59278848-59278919	n-Tv9|chr3_928_tRNAVal_CAC-	yes	0.0392374	0	0.32684	0	0.606538	0	0.589592	0	-0.267289	0.115796	0.654937	0.547456	0.0496913	0.184425	0.613958	0.590556	0.183039	0.598065	YES	-0.0757467	0.601196		0.117058	0.602257	YES	0.415026	0.188586	Null	0.191744	0.611128	Null
81	chr3:84032933-84033003	n-Tg14|chr3_878_tRNAGly_GCC-	yes	1.58736	0	0.968417	0	3.71566	0	4.46706	0	0.339454	-0.00263628	2.06666	2.30952	0.458281	-0.19756	1.07397	1.35406	1.27789	4.09136	NO	0.168409	2.18809		0.13036	1.21401	YES	2.81347	7.68202531354254e-09	Up	0.936026	0.00112096	Up
82	chr3:90279782-90279853	n-Tm11|chr3_792_tRNAMetInit_CAT-	yes	4.73073	0	5.101	0	5.56799	0	5.96704	0	2.58013	2.45246	3.85759	3.93732	3.02836	3.23814	2.63924	3.00963	4.91586	5.76752	NO	2.51629	3.89745	NO	3.13325	2.82443	NO	0.851655	0.00930743	Null	1.68998	1.12045596964911e-09	Up
85	chr3:96115177-96115247	n-Tg2|chr3_282_tRNAGly_CCC+	yes	0.0374523	0	0.0501135	0	-0.284499	0	-0.44522	0	-0.25086	0.225604	-0.41869	-0.505179	-0.0903465	-0.198749	-0.896956	-1.0083	0.0437829	-0.36486	YES	-0.012628	-0.461935		-0.144548	-0.952626	YES	-0.408642	0.191551	Null	0.358772	0.292239	Null
86	chr3:96125997-96126070	n-Tn4|chr3_283_tRNAAsn_GTT+	yes	1.46528	0	0.571001	0	0.817591	0	1.45144	0	0.243691	0.261726	0.193086	0.459288	0.677454	0.209272	0.170767	0.259541	1.01814	1.13451	YES	0.252709	0.326187	YES	0.443363	0.215154	YES	0.116372	0.773445	Null	0.301688	0.383234	Null
87	chr3:96136663-96136735	n-Tv18|chr3_284_tRNAVal_CAC+	yes	2.04501	0	1.18011	0	1.40885	0	2.19791	0	0.497378	-0.141715	0.559433	0.805846	0.902088	0.0226464	0.0181744	0.263407	1.61256	1.80338	NO	0.177831	0.68264		0.462367	0.140791	YES	0.190819	0.634114	Null	0.826385	0.00467486	Up
88	chr3:96138538-96138611	n-Tn5|chr3_757_tRNAAsn_GTT-	yes	0.182438	4.85	0.216018	3.27	-0.367003	0.93	-0.133196	1.38	0.346758	-0.197999	-0.811718	-0.742537	0.0680925	-0.260063	-0.503927	-0.186617	0.199228	-0.250099	YES	0.0743796	-0.777127	YES	-0.0959854	-0.345272	YES	-0.449328	0.150736	Null	-0.60222	0.0509888	Null
89	chr3:96138894-96138967	n-Tn1|chr3_285_tRNAAsn_GTT+	yes	0.324325	6.66	0.591303	4.34	-1.10239	3.7	-0.883298	4.54	0.754406	0.26814	-0.735984	-0.453057	0.246592	0.320722	-0.513528	-0.630901	0.457814	-0.992846	YES	0.511273	-0.59452	YES	0.283657	-0.572214	YES	-1.45066	3.74183847892694e-05	Down	-0.249922	0.481484	Null
90	chr3:96145079-96145150	n-Tq5|chr3_756_tRNAGln_CTG-	yes	1.57568	3.01	0.725666	4.12	1.41805	3.12	1.60308	2.85	0.122823	-0.423611	0.404925	0.541801	0.505106	0.0394882	0.448919	0.363584	1.15067	1.51057	NO	-0.150394	0.473363	YES	0.272297	0.406251	YES	0.359895	0.302585	Null	0.489803	0.124963	Null
91	chr3:96150598-96150669	n-Te19|chr3_286_tRNAGlu_TTC+	yes	0.38506	100	0.0750748	100	-0.568896	100	-0.486157	100	0.0112365	-0.21909	-0.605818	-0.726387	0.116305	-0.180698	-0.662284	-0.666978	0.230067	-0.527526	YES	-0.103927	-0.666102	YES	-0.0321968	-0.664631	YES	-0.757594	0.017003	Null	0.0702588	0.870684	Null
92	chr3:96155090-96155160	n-Tg5|chr3_755_tRNAGly_CCC-	yes	1.48798	100	0.837901	100	0.394261	100	0.97205	100	0.351293	0.134158	-0.000683373	0.146857	0.620528	-0.181085	-0.14098	0.125179	1.16294	0.683155	NO	0.242725	0.073087	YES	0.219722	-0.00790009	YES	-0.479786	0.16143	Null	0.0579833	0.893873	Null
93	chr3:96186834-96186904	n-Tg4|chr3_287_tRNAGly_CCC+	yes	1.27405	100	0.756624	100	0.189766	100	0.829487	100	0.208347	-0.0422742	-0.0626187	-0.0167756	0.360244	-0.242538	-0.428567	0.0103508	1.01534	0.509626	YES	0.0830366	-0.0396972	YES	0.058853	-0.209108	YES	-0.505711	0.135792	Null	0.145227	0.714212	Null
94	chr3:96191328-96191399	n-Te20|chr3_754_tRNAGlu_TTC-	yes	0.339895	100	0.0356336	100	-0.666953	100	-0.62829	100	-0.0235046	-0.459027	-0.75998	-0.791784	0.0736864	-0.25144	-0.696466	-0.755604	0.187765	-0.647622	YES	-0.241266	-0.775882	YES	-0.0888767	-0.726035	YES	-0.835386	0.00885409	Null	0.102542	0.803577	Null
95	chr3:96202982-96203053	n-Tq4|chr3_753_tRNAGln_CTG-	yes	2.97337	0	2.6536	0	2.74642	0	3.46738	0	0.98794	0.873591	1.64403	1.4828	1.56221	1.22756	0.637525	0.864272	2.81348	3.1069	NO	0.930765	1.56342	YES	1.39489	0.750898	NO	0.293416	0.401236	Null	1.27664	5.0183699348865e-06	Up
96	chr3:96206141-96206214	n-Tn10|chr3_289_tRNAAsn_GTT+	yes	1.9879	0	1.7533	0	0.168424	0	0.000886355	0	0.594823	-0.125753	-0.244631	-0.0692729	0.506541	0.520032	-0.598799	-0.424344	1.8706	0.0846554	NO	0.234535	-0.156952	YES	0.513286	-0.511572	YES	-1.78594	1.8676094384374e-06	Down	0.633371	0.0381051	Null
97	chr3:96213992-96214063	n-Th6|chr3_291_tRNAHis_GTG+	yes	2.60444	0	2.43954	0	-0.307036	0	0.47986	0	0.834842	0.518426	-0.794677	-0.603235	1.02103	1.15133	-0.0922375	-0.21787	2.52199	0.0864122	NO	0.676634	-0.698956	YES	1.08618	-0.155054	NO	-2.43558	4.69780414593917e-08	Down	-0.134359	0.734303	Null
98	chr3:96227956-96228026	n-Tg6|chr3_752_tRNAGly_CCC-	yes	1.61058	0	1.13027	0	4.45391	0	4.99141	0	0.560392	0.0300353	2.8019	2.8893	0.433521	0.019638	2.12389	1.9295	1.37043	4.72266	NO	0.295214	2.8456	NO	0.226579	2.0267	NO	3.35223	2.01675907927954e-10	Up	0.750268	0.0110728	Null
99	chr3:96232158-96232230	n-Tk15|chr3_292_tRNALys_CTT+	yes	2.08374	0	1.24037	0	5.93288	0	6.4943	0	0.0649209	0.149052	4.0342	4.10707	0.617891	0.289087	2.79005	2.8129	1.66205	6.21359	NO	0.106987	4.07063	YES	0.453489	2.80148	NO	4.55154	4.38687491395602e-12	Up	1.61566	5.31739746503807e-09	Up
100	chr3:96239895-96239966	n-Th2|chr3_293_tRNAHis_GTG+	yes	0.555447	0	0.560962	0	-0.751107	0	-0.124065	0	-0.194568	0.232863	-0.844399	-0.758914	0.00812751	0.277185	-0.625403	-0.260275	0.558204	-0.437586	YES	0.0191476	-0.801656	YES	0.142656	-0.442839	YES	-0.99579	0.0030347	Down	-0.235309	0.514536	Null
101	chr3:96255348-96255421	n-Tn11|chr3_294_tRNAAsn_GTT+	yes	3.0091	100	2.19081	100	-0.288637	100	-0.312084	100	1.37031	0.452525	-0.8659	-0.562053	1.32905	0.84985	-0.522362	-0.50475	2.59996	-0.30036	NO	0.911415	-0.713976	YES	1.08945	-0.513556	NO	-2.90032	2.558919608918e-09	Down	-0.0223864	0.968255	Null
102	chr3:96256418-96256489	n-Th7|chr3_295_tRNAHis_GTG+	yes	2.71254	100	1.62959	100	-0.295989	100	-0.312972	100	0.836611	0.0661599	-0.626266	-0.578837	1.3528	0.568232	-0.405696	-0.491045	2.17107	-0.30448	NO	0.451386	-0.602551	YES	0.960517	-0.448371	YES	-2.47555	9.39462543428763e-08	Down	0.354951	0.296826	Null
103	chr3:96261993-96262064	n-Th9|chr3_751_tRNAHis_GTG-	yes	2.49622	100	1.53151	100	-0.271805	100	-0.266921	100	0.633172	-0.0485954	-0.624774	-0.581618	1.1516	0.47108	-0.517515	-0.273862	2.01386	-0.269363	NO	0.292288	-0.603196	YES	0.811342	-0.395689	YES	-2.28322	2.11920767510616e-07	Down	0.311546	0.365147	Null
104	chr3:96263061-96263134	n-Tn13|chr3_750_tRNAAsn_GTT-	yes	2.9471	100	2.08464	100	-0.206439	100	-0.306524	100	1.3019	0.397089	-0.857281	-0.605395	1.31736	0.736664	-0.484244	-0.478017	2.51587	-0.256481	NO	0.849495	-0.731338	YES	1.02701	-0.48113	YES	-2.77235	6.83194273660001e-09	Down	-0.0726891	0.865123	Null
105	chr3:96267895-96267966	n-Th11|chr3_749_tRNAHis_GTG-	yes	-0.0224902	0	-0.11449	0	-0.36539	0	-0.0854025	0	-0.106206	0.142715	-0.956342	-0.608765	-0.031219	-0.351943	-0.700959	-0.327734	-0.0684904	-0.225396	YES	0.0182547	-0.782554	YES	-0.191581	-0.514347	YES	-0.156906	0.647776	Null	-0.478043	0.137102	Null
106	chr3:96283314-96283385	n-Tq3|chr3_297_tRNAGln_CTG+	yes	1.80346	0	1.45559	0	1.40791	0	1.92196	0	0.71445	-0.0404326	0.40628	0.613541	0.611626	0.915694	0.0928657	0.354219	1.62952	1.66493	NO	0.337009	0.509911	YES	0.76366	0.223542	YES	0.0354116	0.927791	Null	0.71302	0.0168447	Null
107	chr3:96301704-96301777	n-Tn12|chr3_298_tRNAAsn_GTT+	yes	4.26861	0	4.6187	0	6.64614	0	7.17609	0	2.14643	2.33766	4.77581	4.84167	2.61037	2.79878	3.65163	3.79006	4.44366	6.91112	NO	2.24204	4.80874	NO	2.70458	3.72084	NO	2.46746	2.23365651819921e-08	Up	1.55043	2.08430224194582e-08	Up
108	chr3:96303435-96303507	n-Tk16|chr3_748_tRNALys_CTT-	yes	4.58787	0	4.48989	0	5.68846	0	6.22214	0	2.43658	1.5543	3.94447	3.89005	2.78869	2.38335	2.77257	2.88013	4.53888	5.9553	NO	1.99544	3.91726	NO	2.58602	2.82635	NO	1.41642	6.82262097710681e-05	Up	1.68148	1.30898734162145e-09	Up
109	chr3:96304289-96304360	n-Th8|chr3_747_tRNAHis_GTG-	yes	3.83404	0	3.74255	0	5.57182	0	6.07438	0	1.90391	1.46543	3.54655	3.58645	1.95091	1.82455	2.55973	2.75044	3.78829	5.8231	NO	1.68467	3.5665	NO	1.88773	2.65509	NO	2.0348	3.61296720034354e-07	Up	1.11447	8.16099346072711e-05	Up
110	chr3:96304932-96305003	n-Tg26|chr3_746_tRNAGly_TCC-	yes	5.31651	0	5.62663	0	6.86278	0	7.26893	0	2.68695	2.8172	4.99298	4.98158	3.3155	3.5505	3.71151	3.98421	5.47157	7.06586	NO	2.75208	4.98728	NO	3.433	3.84786	NO	1.59429	1.3518386046705e-05	Up	1.82035	7.45759258437055e-11	Up
111	chr3:96305370-96305441	n-Te13|chr3_745_tRNAGlu_CTC-	yes	4.51741	0	5.34458	0	5.77385	0	6.23357	0	2.05545	2.42552	4.00297	4.18623	2.59035	3.26432	2.82014	3.14157	4.93099	6.00371	NO	2.24049	4.0946	NO	2.92733	2.98085	NO	1.07272	0.00272256	Up	1.8006	1.12464620151448e-10	Up
112	chr3:96962008-96962079	n-Te12|chr3_303_tRNAGlu_CTC+	yes	3.83846	0	3.69071	0	6.02802	0	6.62728	0	1.41982	1.19364	4.06812	4.09249	2.20971	1.85929	2.8347	3.17592	3.76459	6.32765	NO	1.30673	4.0803	NO	2.0345	3.00531	NO	2.56306	1.14139358686401e-08	Up	1.80276	1.07693970507842e-10	Up
113	chr3:97485382-97485453	n-Tq2|chr3_309_tRNAGln_CTG+	yes	1.08185	0	0.8375	0	0.342582	0	0.577458	0	0.027409	0.0917975	-0.39756	-0.228493	0.282067	0.180092	-0.283148	-0.541271	0.959673	0.46002	YES	0.0596032	-0.313027	YES	0.23108	-0.41221	YES	-0.499653	0.113086	Null	0.270659	0.440311	Null
115	chr3:121995866-121995950	n-Tr22|chr3_628_tRNAArg_TCT_I-	yes	4.34314	0	4.19531	0	4.7251	0	5.16948	0	2.16087	1.65116	2.69587	2.74325	2.91156	2.48131	1.587	1.89003	4.26922	4.94729	NO	1.90601	2.71956	NO	2.69643	1.73852	NO	0.678062	0.0348906	Null	1.77146	1.9984581351666e-10	Up
116	chr3:123602105-123602176	n-Te1|chr3_622_tRNAGlu_CTC-	yes	-0.025871	0	-0.0712827	0	0.0708799	0	-0.0985335	0	0.087714	0.0101494	0.32537	0.463571	0.109389	0.275607	0.070955	0.106337	-0.0485768	-0.0138268	YES	0.0489317	0.394471	YES	0.192498	0.0886458	YES	0.0347501	0.926537	Null	0.449391	0.166767	Null
118	chr4:10801211-10801292	n-Ts9|chr4_16_tRNASer_AGA+	yes	4.60635	0	4.2692	0	5.55224	0	5.94168	0	2.50888	1.83215	3.70648	3.57479	3.02598	2.76377	2.47128	2.76305	4.43777	5.74696	NO	2.17052	3.64063	NO	2.89488	2.61716	NO	1.30919	0.000167322	Up	1.74783	3.26587615461832e-10	Up
123	chr4:27831926-27831999	n-Ti2|chr4_62_tRNAIle_AAT+	yes	-0.124763	0	0.281053	0	-0.652727	0	-0.493805	0	-0.290592	0.169939	-0.663808	-0.474392	-0.110099	0.311953	-0.866615	-0.573274	0.0781447	-0.573266	YES	-0.0603263	-0.5691	YES	0.100927	-0.719945	YES	-0.651411	0.0417577	Null	0.312098	0.364381	Null
124	chr4:32317225-32317295	n-Tg3|chr4_67_tRNAGly_CCC+	yes	-0.236077	0	-0.160669	0	-0.531924	0	-0.381434	0	-0.382262	-0.29668	-0.550431	-0.227578	-0.270881	-0.413008	-0.559219	-0.543361	-0.198373	-0.456679	YES	-0.339471	-0.389004	YES	-0.341944	-0.55129	YES	-0.258306	0.42489	Null	0.159812	0.682715	Null
127	chr4:82265527-82265598	n-Th10|chr4_1697_tRNAHis_GTG-	yes	-0.0950875	0	0.211588	0	1.84739	0	2.42731	0	-0.345172	-0.140946	0.294907	0.522714	-0.316383	-0.335788	0.290277	0.379441	0.05825	2.13735	NO	-0.243059	0.40881	YES	-0.326085	0.334859	YES	2.0791	3.62665738318767e-07	Up	-0.0090747	0.990271	Null
131	chr4:131681174-131681245	n-Ta22|chr4_626_tRNAAla_CGC+	yes	0.155141	0	-0.325465	0.44	-0.409146	0	-0.645591	0	0.464428	-0.428673	-0.469322	-0.246149	0.286367	-0.209111	-0.830259	-0.767102	-0.0851618	-0.527369	YES	0.0178774	-0.357735	YES	0.0386279	-0.79868	YES	-0.442207	0.172049	Null	0.461696	0.152695	Null
133	chr4:132071923-132071994	n-Ta8|chr4_645_tRNAAla_AGC+	yes	0.039031	1.32	0.162124	5.33	1.42679	3.55	2.22741	1.06	-0.286408	-0.128974	0.598648	0.248914	0.0568079	0.0499197	0.235075	0.493047	0.100578	1.8271	NO	-0.207691	0.423781	YES	0.0533638	0.364061	YES	1.72652	8.90730594185452e-06	Up	0.320774	0.35004	Null
134	chr4:132670411-132670481	n-Tg9|chr4_1314_tRNAGly_GCC-	yes	-0.0815769	0	0.0561376	0	-0.673769	0	-0.679228	0	0.410769	-0.231772	-0.531182	-1.11398	0.254114	0.110488	-0.975518	-0.378862	-0.0127197	-0.676499	YES	0.0894983	-0.822581	YES	0.182301	-0.67719	YES	-0.663779	0.0337776	Null	-0.052588	0.903704	Null
137	chr4:138986421-138986492	n-Tv1|chr4_1183_tRNAVal_AAC-	yes	0.341507	0	0.149464	0	-0.178094	0	-0.347009	0	0.0138549	0.109823	-0.725251	-0.229689	-0.340545	-0.0343348	-0.260275	-0.472454	0.245485	-0.262552	YES	0.0618391	-0.47747	YES	-0.18744	-0.366365	YES	-0.508037	0.105065	Null	-0.360385	0.289878	Null
140	chr5:5627681-5627751	n-Ts1|chr5_13_tRNASeC_TCA+	yes	0.214745	3.13	-0.0766903	8.38	-0.163188	4.06	-0.335897	8.51	0.316831	0.401771	-0.304023	-0.172283	0.32504	-0.152881	-0.761188	-0.466909	0.0690274	-0.249543	YES	0.359301	-0.238153	YES	0.0860796	-0.614049	YES	-0.31857	0.322719	Null	0.102674	0.803577	Null
142	chr5:31190456-31190544	n-Ty9|chr5_109_tRNATyr_GTA_I+	yes	4.98376	0	5.01237	0	6.41499	0	6.98594	0	2.70412	2.34007	4.52893	4.54337	3.29218	3.318	3.49298	3.59358	4.99807	6.70047	NO	2.52209	4.53615	NO	3.30509	3.54328	NO	1.7024	6.15011897498748e-06	Up	1.77586	1.82414824343474e-10	Up
143	chr5:31190888-31190960	n-Ta15|chr5_110_tRNAAla_AGC+	yes	5.37129	0	5.78982	0	5.73422	0	6.23384	0	2.9147	2.68134	3.82089	3.86842	3.36051	3.61384	2.82045	3.0476	5.58056	5.98403	NO	2.79802	3.84466	NO	3.48718	2.93403	NO	0.403469	0.223942	Null	1.59979	7.41739446518086e-09	Up
149	chr5:98470109-98470181	n-Tk8|chr5_1627_tRNALys_CTT-	yes	-0.175924	0	0.00680291	0	-0.290258	0	-0.405028	0	-0.470741	-0.441728	-0.54389	-0.676778	-0.295315	-0.336138	-0.521017	-0.457613	-0.0845606	-0.347643	YES	-0.456234	-0.610334	YES	-0.315726	-0.489315	YES	-0.263083	0.416466	Null	0.0194884	0.973933	Null
150	chr5:101421893-101421964	n-Td1|chr5_1609_tRNAAsp_GTC-	yes	-0.651847	0	-0.124294	0	-0.325617	0	-0.35523	0	-0.560852	-0.268911	-0.806776	-0.445273	-0.378917	0.0816316	-0.225855	-0.537481	-0.38807	-0.340424	YES	-0.414881	-0.626025	YES	-0.148643	-0.381668	YES	0.0476466	0.900677	Null	0.0218813	0.968255	Null
153	chr5:125884620-125884691	n-Ta39|chr5_1317_tRNAAla_TGC-	yes	4.83766	0	5.61422	0	6.16287	0	6.57602	0	2.5797	2.54935	4.25003	4.32037	2.9547	3.37021	2.8903	3.20453	5.22594	6.36944	NO	2.56452	4.2852	NO	3.16245	3.04742	NO	1.1435	0.00135075	Up	1.83571	5.29360248429699e-11	Up
154	chr5:125885977-125886048	n-Td15|chr5_1316_tRNAAsp_GTC-	yes	2.9485	0	3.78559	0	4.82929	0	5.35974	0	0.579623	1.41892	2.95197	2.90656	1.20993	2.04707	1.66126	1.74777	3.36704	5.09451	NO	0.999271	2.92926	YES	1.6285	1.70451	NO	1.72747	1.50037538054509e-05	Up	1.85398	3.40581423182664e-11	Up
155	chr5:125886425-125886497	n-Tf7|chr5_1315_tRNAPhe_GAA-	yes	4.92938	0	4.80442	0	6.20366	0	6.48465	0	2.70362	2.41534	4.40416	4.25149	3.30483	3.2682	3.02175	3.31438	4.8669	6.34415	NO	2.55948	4.32783	NO	3.28651	3.16807	NO	1.47725	2.80654937484535e-05	Up	1.88679	1.7148466299972e-11	Up
156	chr5:125889386-125889457	n-Td14|chr5_1314_tRNAAsp_GTC-	yes	5.25199	0	5.37645	0	6.86219	0	7.20424	0	3.02341	2.60956	4.91552	4.88571	3.66332	3.76895	3.78778	3.96559	5.31422	7.03321	NO	2.81649	4.90061	NO	3.71613	3.87669	NO	1.71899	3.77122919336922e-06	Up	1.92358	7.23056737842197e-12	Up
157	chr5:125889842-125889913	n-Ta34|chr5_702_tRNAAla_TGC+	yes	5.1707	0	4.74736	0	5.76413	0	6.16957	0	2.94173	2.10623	4.04166	4.1039	3.27786	2.78964	2.75984	3.04578	4.95903	5.96685	NO	2.52398	4.07278	NO	3.03375	2.90281	NO	1.00782	0.00263662	Up	1.67973	1.34620207728595e-09	Up
162	chr5:144108745-144108871	n-Ts11|chr5_1135_tRNASer_AGA_I-	yes	-0.144039	2.43	-0.0452811	4.76	-0.22807	1.88	-0.732938	8.16	-0.302818	0.177896	-0.529065	-0.638849	-0.222266	-0.291993	-0.605852	-0.943806	-0.0946601	-0.480504	YES	-0.0624612	-0.583957	YES	-0.257129	-0.774829	YES	-0.385844	0.235375	Null	-0.00379596	0.992093	Null
163	chr5:150040577-150040650	n-Tn14|chr5_1043_tRNAAsn_GTT-	yes	4.58133	0	5.13435	0	5.35483	0	5.44346	0	2.42347	2.45205	3.85345	3.94186	2.73261	3.2541	2.69937	2.83219	4.85784	5.39914	NO	2.43776	3.89766	NO	2.99336	2.76578	NO	0.541302	0.0954856	Null	1.68747	1.17334208742101e-09	Up
165	chr6:10050371-10050443	n-Tv13|chr6_10_tRNAVal_CAC+	yes	0.380098	0	-0.38809	0	-0.174855	0	0.0809775	0	0.413745	-0.485081	-0.0397459	-0.0396252	0.319579	-0.405044	0.202581	0.126906	-0.00399562	-0.0469389	YES	-0.0356682	-0.0396856	YES	-0.0427327	0.164744	YES	-0.0429433	0.916109	Null	-0.211494	0.567365	Null
166	chr6:29338824-29338895	n-Tp6|chr6_46_tRNAPro_AGG+	yes	2.85961	0	2.92464	0	4.85212	0	5.37482	0	0.690687	0.812028	3.0571	3.06889	1.37416	1.47421	1.94883	2.1186	2.89212	5.11347	NO	0.751357	3.063	YES	1.42419	2.03372	NO	2.22134	9.61963746750796e-08	Up	1.70211	8.70612274822068e-10	Up
170	chr6:38483931-38484003	n-Tr10|chr6_107_tRNAArg_CCT+	yes	4.65159	0	4.94947	0	5.73601	0	6.31535	0	2.05545	2.10709	3.90799	3.97929	2.58175	2.80964	2.85555	3.00018	4.80053	6.02568	NO	2.08127	3.94364	NO	2.69569	2.92786	NO	1.22516	0.000440503	Up	1.6302	3.87925265083242e-09	Up
190	chr6:47928996-47929067	n-Tc57|chr6_157_tRNACys_GCA+	yes	4.89657	0	5.0073	0	5.65677	0	6.29087	0	2.88379	2.39873	3.80549	3.92728	3.41724	3.32284	2.67798	2.857	4.95194	5.97382	NO	2.64126	3.86638	NO	3.37004	2.76749	NO	1.02188	0.00253807	Up	1.82767	6.35434228506158e-11	Up
191	chr6:48083936-48084007	n-Tc37|chr6_161_tRNACys_GCA+	yes	-0.236654	1.49	-0.125896	0	0.688209	0	1.17133	4	-0.298363	-0.111422	0.227529	0.980316	-0.302823	0.0197584	0.47003	0.549946	-0.181275	0.92977	YES	-0.204892	0.603923	YES	-0.141532	0.509988	YES	1.11104	0.000943839	Up	0.157295	0.686375	Null
192	chr6:48089509-48089580	n-Tc10|chr6_1034_tRNACys_GCA-	yes	0.218017	0	0.232319	0	0.133754	0	0.206651	0	0.214172	0.228627	0.438242	0.501672	0.238891	0.0640856	0.101674	0.0337459	0.225168	0.170202	YES	0.221399	0.469957	YES	0.151488	0.0677101	YES	-0.0549662	0.885249	Null	0.332336	0.33214	Null
193	chr6:48090483-48090554	n-Tc4|chr6_1033_tRNACys_GCA-	yes	-0.377762	0	-0.475035	0	-0.0569726	0	0.351856	0	-0.416312	-0.373192	0.279365	0.217574	-0.367308	-0.326951	0.202488	0.640811	-0.426398	0.147442	YES	-0.394752	0.24847	YES	-0.34713	0.42165	YES	0.57384	0.0715842	Null	-0.125557	0.75566	Null
194	chr6:48093355-48093426	n-Tc13|chr6_162_tRNACys_GCA+	yes	-0.40515	26.08	0.148955	25.77	0.124783	8.33	0.627323	8.63	-0.125857	0.0326849	-0.376143	-0.475143	-0.530874	-0.234215	-0.321544	-0.0942342	-0.128097	0.376053	YES	-0.0465861	-0.425643	YES	-0.382545	-0.207889	YES	0.504151	0.131677	Null	-0.553712	0.0769609	Null
195	chr6:48094927-48094998	n-Tc36|chr6_1032_tRNACys_GCA-	yes	-0.55572	50.81	-0.353993	35.45	-0.00922693	50.54	0.21267	58.7	-0.0279121	-0.17788	-0.434066	-0.384313	-0.211905	-0.632473	-0.229508	-0.393997	-0.454856	0.101721	YES	-0.102896	-0.409189	YES	-0.422189	-0.311752	YES	0.556578	0.077334	Null	-0.41673	0.203856	Null
196	chr6:48104713-48104784	n-Tc38|chr6_163_tRNACys_GCA+	yes	-0.118815	46.69	-0.491849	39.11	1.44329	37.05	1.70371	27.3	-0.378445	-0.527716	0.501115	0.587649	-0.225392	-0.28181	0.400443	0.485426	-0.305332	1.5735	YES	-0.45308	0.544382	YES	-0.253601	0.442935	YES	1.87883	1.12015306828749e-06	Up	0.300926	0.384529	Null
197	chr6:48106274-48106345	n-Tc35|chr6_1031_tRNACys_GCA-	yes	0.182187	31.95	0.182757	31.01	-0.315601	57.82	-0.0330865	63.47	0.390137	0.368188	-0.413588	-0.195524	0.0751637	0.0512433	-0.421486	-0.373117	0.182472	-0.174344	YES	0.379162	-0.304556	YES	0.0632035	-0.397302	YES	-0.356816	0.261981	Null	-0.223213	0.541887	Null
198	chr6:48110178-48110249	n-Tc39|chr6_164_tRNACys_GCA+	yes	-0.164442	48.77	-0.262485	35.46	1.42134	38.2	1.24537	39.25	-0.613603	-0.416411	0.222985	0.0892401	-0.209266	0.111663	0.395903	0.425035	-0.213464	1.33335	YES	-0.515007	0.156112	YES	-0.0488013	0.410469	YES	1.54682	1.3518386046705e-05	Up	0.211849	0.567018	Null
199	chr6:48114100-48114171	n-Tc40|chr6_166_tRNACys_GCA+	yes	-0.0667945	3.33	0.0715173	16.47	1.84776	4.7	2.63046	7.22	0.14559	0.114469	1.04231	0.885504	-0.0263964	0.0735721	1.00226	0.582532	0.00236143	2.23911	NO	0.130029	0.963907	YES	0.0235879	0.792397	YES	2.23675	1.73071890111143e-07	Up	0.0650691	0.878387	Null
200	chr6:48136317-48136388	n-Tc8|chr6_167_tRNACys_GCA+	yes	-0.121436	0	-0.38024	0	0.804885	0	1.13595	0	-0.161845	-0.457964	1.06133	0.489449	-0.0904347	-0.573427	1.07062	0.957041	-0.250838	0.97042	YES	-0.309905	0.775388	YES	-0.331931	1.01383	YES	1.22126	0.000321485	Up	-0.260466	0.461666	Null
201	chr6:48147025-48147096	n-Tc41|chr6_168_tRNACys_GCA+	yes	-0.0826116	0	-0.362803	0	-0.547349	0	-0.474483	0	-0.20606	-0.60028	-0.456104	-0.710204	-0.23805	-0.389055	-0.782422	-0.485505	-0.222707	-0.510916	YES	-0.40317	-0.583154	YES	-0.313552	-0.633963	YES	-0.288209	0.37386	Null	0.140427	0.718304	Null
202	chr6:48155067-48155138	n-Tc1|chr6_170_tRNACys_GCA+	yes	0.454923	0	0.181203	0	-0.320823	0	0.175348	0	0.521291	0.0915387	0.509686	0.557565	0.599961	-0.0214746	0.722788	-0.00498226	0.318063	-0.0727378	YES	0.306415	0.533626	YES	0.289243	0.358903	YES	-0.390801	0.232642	Null	0.157551	0.686375	Null
203	chr6:48157450-48157521	n-Tc34|chr6_1030_tRNACys_GCA-	yes	-0.183511	0	0.161987	0	0.8068	0	0.728851	0	0.189587	0.180029	0.0685557	0.331223	-0.027702	0.252114	0.513834	0.168931	-0.010762	0.767826	YES	0.184808	0.199889	YES	0.112206	0.341382	YES	0.778587	0.0146245	Null	-0.214095	0.561996	Null
204	chr6:48159837-48159908	n-Tc49|chr6_1029_tRNACys_GCA-	yes	0.0166049	0	0.0280373	0	0.0527678	0	0.661228	0	-0.38089	-0.788991	-0.669641	-0.660325	-0.148765	-0.144148	-0.523711	-0.418543	0.0223211	0.356998	YES	-0.58494	-0.664983	YES	-0.146457	-0.471127	YES	0.334677	0.315483	Null	0.244627	0.491514	Null
205	chr6:48173093-48173164	n-Tc33|chr6_1027_tRNACys_GCA-	yes	-0.307397	0	0.123089	0	0.833239	0	0.729716	0	-0.335535	0.0180311	0.199566	0.0318549	-0.146558	0.196529	0.294423	-0.0250166	-0.092154	0.781478	YES	-0.158752	0.115711	YES	0.0249852	0.134703	YES	0.873632	0.00706956	Null	0.164744	0.671767	Null
206	chr6:48174328-48174399	n-Tc48|chr6_1026_tRNACys_GCA-	yes	0.311529	0	-0.462874	0	0.164651	0	0.327526	0	0.274783	-0.502296	-0.458314	-0.208304	0.16176	-0.101225	-0.302445	-0.711421	-0.0756724	0.246088	YES	-0.113756	-0.333309	YES	0.0302672	-0.506933	YES	0.321761	0.352695	Null	0.317648	0.354631	Null
207	chr6:48194315-48194386	n-Tc32|chr6_1025_tRNACys_GCA-	yes	-0.150755	2.12	-0.170426	1.88	1.26416	2.67	1.8336	1.23	-0.240798	-0.0644339	0.68655	0.612005	0.0232226	-0.224444	0.327726	0.40724	-0.16059	1.54888	YES	-0.152616	0.649278	YES	-0.100611	0.367483	YES	1.70947	5.79643599404232e-06	Up	0.3338	0.329902	Null
208	chr6:48202102-48202173	n-Tc31|chr6_1024_tRNACys_GCA-	yes	-0.255792	0	0.426025	0	-0.295989	0	-0.885517	0	0.0316384	0.413362	-0.478828	-0.0926906	-0.163866	-0.0334515	-0.281557	-0.12415	0.0851161	-0.590753	YES	0.2225	-0.28576	YES	-0.0986587	-0.202853	YES	-0.675869	0.0500671	Null	-0.404065	0.221155	Null
209	chr6:48203079-48203150	n-Tc15|chr6_1023_tRNACys_GCA-	yes	0.0130439	12.21	-0.150115	12.35	-0.793702	12.97	-0.798287	6.2	0.11174	0.0103041	-1.15711	-1.04899	-0.0411528	-0.0589065	-1.08096	-1.09809	-0.0685354	-0.795994	YES	0.0610219	-1.10305	YES	-0.0500297	-1.08953	YES	-0.727459	0.0202606	Null	-0.124577	0.757174	Null
210	chr6:48211721-48211792	n-Tc30|chr6_1022_tRNACys_GCA-	yes	0.205966	0	-0.0987064	0	-0.108158	0	0.44805	0	0.559134	-0.221712	0.226157	0.0386922	0.441162	-0.483791	-0.313141	-0.0423984	0.0536296	0.169946	YES	0.168711	0.132424	YES	-0.0213145	-0.17777	YES	0.116316	0.750852	Null	0.120169	0.76733	Null
211	chr6:48218457-48218528	n-Tc29|chr6_1021_tRNACys_GCA-	yes	-0.12162	18.75	0.273602	12.78	0.0332094	35.48	0.708609	13.88	-0.29121	0.478696	-0.124889	-0.0278223	-0.358711	0.157629	0.107721	0.244167	0.0759907	0.370909	YES	0.0937428	-0.0763555	YES	-0.100541	0.175944	YES	0.294919	0.397907	Null	-0.446584	0.169991	Null
212	chr6:48221925-48221996	n-Tc42|chr6_171_tRNACys_GCA+	yes	0.198661	36.32	-0.128721	31.01	-0.248407	51.61	0.27211	33.18	0.305576	-0.100979	-0.152469	-0.0799725	0.343547	-0.0125703	-0.681629	-0.258733	0.0349697	0.0118514	YES	0.102298	-0.116221	YES	0.165488	-0.470181	YES	-0.0231184	0.956315	Null	0.41715	0.203801	Null
213	chr6:48223679-48223750	n-Tc43|chr6_172_tRNACys_GCA+	yes	-0.419205	68.75	-0.270802	40.29	-0.489058	34.11	-0.184849	47.61	0.23741	0.19397	-0.44698	-0.363626	-0.00228708	-0.198591	-0.206787	-0.13076	-0.345004	-0.336953	YES	0.21569	-0.405303	YES	-0.100439	-0.168773	YES	0.00805012	0.984961	Null	-0.552659	0.0774101	Null
214	chr6:48228791-48228862	n-Tc3|chr6_1020_tRNACys_GCA-	yes	-0.179938	0	-0.0749738	0	0.599269	0	0.604152	0	-0.585549	-0.0865115	0.528818	0.436081	-0.166716	-0.15767	0.470823	0.348864	-0.127456	0.601711	YES	-0.33603	0.48245	YES	-0.162193	0.409844	YES	0.729166	0.0197864	Null	0.246443	0.488153	Null
215	chr6:48229770-48229841	n-Tc28|chr6_1019_tRNACys_GCA-	yes	-0.12222	8.73	-0.332393	8.16	-0.117531	18.72	0.14636	16.29	0.0694818	-0.634007	-0.292189	-0.315989	-0.00842966	-0.612388	-0.462683	-0.372623	-0.227306	0.0144148	YES	-0.282263	-0.304089	YES	-0.310409	-0.417653	YES	0.241721	0.461215	Null	0.0854183	0.834306	Null
216	chr6:48238875-48238946	n-Tc12|chr6_1018_tRNACys_GCA-	yes	0.0239413	0	-0.0828636	0	0.149693	0	0.569315	0	0.471403	0.238988	0.678544	0.446615	0.233565	0.125975	0.48525	0.423239	-0.0294612	0.359504	YES	0.355196	0.562579	YES	0.17977	0.454244	YES	0.388965	0.225864	Null	-0.0670908	0.875302	Null
217	chr6:48243006-48243077	n-Tc50|chr6_1017_tRNACys_GCA-	yes	-0.36193	0	-0.314211	0	0.556435	0	0.716099	0	-0.314183	-0.197433	-0.0378304	0.607429	-0.313859	-0.163666	0.100458	0.530579	-0.33807	0.636267	YES	-0.255808	0.284799	YES	-0.238763	0.315518	YES	0.974338	0.0024444	Up	-0.0136742	0.985457	Null
218	chr6:48247432-48247503	n-Tc44|chr6_173_tRNACys_GCA+	yes	-0.182663	8.69	-0.111131	8.6	-0.76712	19.04	-0.149258	18.84	-0.361102	-0.152899	-0.433036	-0.455845	-0.340502	-0.363618	0.118001	-0.138968	-0.146897	-0.458189	YES	-0.257001	-0.444441	YES	-0.35206	-0.0104835	YES	-0.311292	0.354152	Null	-0.529016	0.0935148	Null
219	chr6:48248949-48249020	n-Tc27|chr6_1016_tRNACys_GCA-	yes	-0.176837	32.43	-0.378048	33.64	-0.303599	21.1	-0.0328878	28.94	-0.00627241	-0.749095	-0.798151	-0.676607	-0.0582749	-0.818851	-0.408125	-0.154116	-0.277442	-0.168243	YES	-0.377684	-0.737379	YES	-0.438563	-0.28112	YES	0.109199	0.757499	Null	-0.517138	0.101892	Null
220	chr6:48252458-48252529	n-Tc6|chr6_174_tRNACys_GCA+	yes	0.188608	6.06	-0.275594	4.34	-0.470258	1.66	-0.778293	10.11	0.364273	0.0745952	-1.28927	-0.603235	0.278536	-0.105573	-0.790201	-0.969496	-0.0434928	-0.624275	YES	0.219434	-0.946254	YES	0.0864817	-0.879848	YES	-0.580782	0.0732277	Null	-0.199358	0.590869	Null
221	chr6:48253464-48253535	n-Tc17|chr6_175_tRNACys_GCA+	yes	-0.37229	52.17	0.00860406	28.3	0.133754	38.7	0.0417838	5.26	-0.168532	-0.0868657	0.130632	0.441211	-0.252086	0.154505	0.148324	-0.13153	-0.181843	0.0877687	YES	-0.127699	0.285921	YES	-0.0487906	0.00839689	YES	0.269612	0.412598	Null	0.356433	0.295117	Null
222	chr6:48255463-48255534	n-Tc7|chr6_1015_tRNACys_GCA-	yes	-0.201599	6.89	0.0102976	1.33	-1.28157	7.31	-0.893845	3.89	0.00187928	-0.0462266	-0.536566	-0.685814	0.11212	0.164999	-0.958003	-0.586705	-0.0956506	-1.08771	YES	-0.0221737	-0.61119	YES	0.138559	-0.772354	YES	-0.992057	0.00255364	Down	0.321896	0.347994	Null
223	chr6:48258728-48258799	n-Tc16|chr6_1014_tRNACys_GCA-	yes	-0.379727	14.92	0.133463	17.39	-0.277962	9.39	-0.247869	22.22	-0.158282	-0.242419	-0.731774	-0.529943	-0.111007	0.155655	-0.425683	-0.67447	-0.123132	-0.262915	YES	-0.200351	-0.630858	YES	0.0223239	-0.550077	YES	-0.139783	0.69276	Null	0.141893	0.718304	Null
224	chr6:48259706-48259777	n-Tc26|chr6_1013_tRNACys_GCA-	yes	-0.55082	5.66	-0.0899381	14.71	0.406928	17.99	0.417319	41.69	-0.436517	-0.564537	0.759273	0.299903	-0.543078	-0.0216689	0.503193	-0.0742498	-0.320379	0.412124	YES	-0.500527	0.529588	YES	-0.282373	0.214472	YES	0.732503	0.0224287	Null	0.53327	0.0903038	Null
225	chr6:48261498-48261569	n-Tc9|chr6_176_tRNACys_GCA+	yes	-0.476935	6.25	0.140866	3.22	-0.313948	4.16	-0.466979	11.9	0.0735333	-0.105544	-0.240837	-0.49463	-0.1368	0.0334033	-0.305545	-0.375731	-0.168035	-0.390463	YES	-0.0160055	-0.367734	YES	-0.0516983	-0.340638	YES	-0.222429	0.519992	Null	-0.0627888	0.882992	Null
226	chr6:48263017-48263088	n-Tc25|chr6_1012_tRNACys_GCA-	yes	-1.07582	17.24	-0.297243	17.33	0.379704	12.59	0.287898	11.62	-0.57644	-0.257025	-0.0167015	0.121953	-0.658026	-0.0444681	0.337283	0.231691	-0.686531	0.333801	YES	-0.416733	0.0526257	YES	-0.351247	0.284487	YES	1.02033	0.00311314	Up	-0.166376	0.667379	Null
227	chr6:48266536-48266605	n-Tc2|chr6_177_tRNACys_GCA+	yes	-0.562354	19.04	-0.132497	15.29	-0.578402	7.69	-0.498584	26.31	0.260603	0.00391309	-0.603368	-0.197913	0.148505	-0.0575199	-0.0769784	-0.533196	-0.347425	-0.538493	YES	0.132258	-0.40064	YES	0.0454927	-0.305087	YES	-0.191068	0.577857	Null	-0.182318	0.63048	Null
228	chr6:48267514-48267585	n-Tc45|chr6_178_tRNACys_GCA+	yes	0.0948735	33.33	-0.0592475	25	0.0568681	32.43	-0.054706	1.49	-0.247091	-0.21757	-0.586384	0.257233	0.0413911	-0.0992439	0.139585	-0.123585	0.017813	0.00108105	YES	-0.23233	-0.164575	YES	-0.0289264	0.0080001	YES	-0.016732	0.965093	Null	0.0308288	0.957539	Null
229	chr6:48282839-48282910	n-Tc24|chr6_1011_tRNACys_GCA-	yes	-0.513665	3.03	0.211556	6.38	0.640602	6.79	0.866987	11.59	-0.808628	0.318589	0.424558	0.313809	-0.92944	0.415092	0.393224	-0.0320575	-0.151055	0.753794	YES	-0.245019	0.369184	YES	-0.257174	0.180583	YES	0.904849	0.00779771	Null	0.176446	0.641917	Null
230	chr6:48286107-48286178	n-Tc23|chr6_1010_tRNACys_GCA-	yes	-0.35448	12.9	-0.0612503	26.31	0.474392	19.19	0.770607	23.07	-0.335503	-0.184574	0.314642	0.493475	-0.300323	-0.223959	-0.0112812	0.118671	-0.207865	0.622499	YES	-0.260038	0.404058	YES	-0.262141	0.0536952	YES	0.830364	0.00991133	Null	0.34826	0.306371	Null
231	chr6:48287090-48287161	n-Tc22|chr6_1009_tRNACys_GCA-	yes	-0.166163	24.7	0.135862	23.13	-0.408765	31.85	-0.656051	12.5	-0.502777	-0.370558	-0.723639	-0.52915	-0.0408232	-0.0581068	-0.515144	-0.552045	-0.0151505	-0.532408	YES	-0.436668	-0.626395	YES	-0.049465	-0.533595	YES	-0.517257	0.103146	Null	0.294403	0.395618	Null
232	chr6:48290612-48290683	n-Tc14|chr6_179_tRNACys_GCA+	yes	-0.0431379	16.07	0.208519	10.9	-0.245023	17.37	-0.243708	12.14	-0.248053	0.167289	-0.745379	-0.177436	-0.353054	0.146671	-0.387087	-0.326419	0.0826907	-0.244366	YES	-0.0403823	-0.461407	YES	-0.103191	-0.356753	YES	-0.327056	0.306392	Null	-0.167463	0.665504	Null
233	chr6:48291587-48291658	n-Tc5|chr6_180_tRNACys_GCA+	yes	0.0178466	5.35	0.32757	2.92	0.246451	0.98	0.398515	4.38	0.295587	0.25509	-0.072874	0.153493	-0.0775765	0.513718	0.449969	0.299419	0.172708	0.322483	YES	0.275339	0.0403096	YES	0.218071	0.374694	YES	0.149774	0.664855	Null	-0.391652	0.237879	Null
234	chr6:48299761-48299832	n-Tc21|chr6_1008_tRNACys_GCA-	yes	-0.557397	17.07	0.165718	8.86	-0.262379	14.28	0.187778	15.2	-0.310664	0.123712	0.0301252	0.0282928	-0.324779	0.271137	-0.164016	-0.16871	-0.19584	-0.0373006	YES	-0.0934762	0.029209	YES	-0.0268211	-0.166363	YES	0.158539	0.671963	Null	0.262227	0.457568	Null
235	chr6:48304018-48304089	n-Tc20|chr6_1006_tRNACys_GCA-	yes	-0.126441	10.34	-0.10554	19.87	-0.0156967	25.26	0.0348797	25.23	0.375546	-0.393064	0.0306316	-0.202665	-0.155051	0.0632395	0.268312	0.00452512	-0.115991	0.00959151	YES	-0.00875881	-0.0860169	YES	-0.045906	0.136419	YES	0.125582	0.714458	Null	-0.259583	0.462805	Null
236	chr6:48305854-48305925	n-Tc46|chr6_181_tRNACys_GCA+	yes	0.0599771	19.6	-0.0495171	20.79	-0.0779056	19.31	-0.176106	18.23	0.0922952	-0.144741	-0.303736	0.109561	0.0729109	-0.253957	0.0294242	-0.844917	0.00523	-0.127006	YES	-0.0262229	-0.0970874	YES	-0.0905228	-0.407746	YES	-0.132236	0.699372	Null	0.246359	0.488153	Null
237	chr6:48306850-48306921	n-Tc11|chr6_182_tRNACys_GCA+	yes	0.577129	0	0.285153	0	0.530346	0	0.208151	0	-0.253621	0.286895	1.02543	0.309105	0.268649	-0.00695452	0.528524	1.138	0.431141	0.369248	YES	0.016637	0.667267	YES	0.130847	0.833262	YES	-0.0618929	0.875034	Null	-0.0517845	0.905015	Null
238	chr6:48313531-48313602	n-Tc19|chr6_1005_tRNACys_GCA-	yes	-0.368676	48.78	-0.247519	54.66	-0.465175	72.41	-0.0297222	81.13	-0.675832	0.0578739	-0.123944	-0.52269	-0.548962	-0.366269	-0.314931	-0.207547	-0.308098	-0.247448	YES	-0.308979	-0.323317	YES	-0.457615	-0.261239	YES	0.0606492	0.876591	Null	-0.210713	0.56898	Null
241	chr6:86353887-86353957	n-Tg8|chr6_317_tRNAGly_CCC+	yes	4.55159	0	4.60326	0	5.43501	0	5.96468	0	2.29856	1.87569	3.67781	3.51635	2.76652	2.72068	2.29683	2.48459	4.57743	5.69984	NO	2.08712	3.59708	NO	2.7436	2.39071	NO	1.12242	0.000900486	Up	1.86284	2.82362354471284e-11	Up
253	chr6:135217793-135217866	n-Tv20|chr6_651_tRNAVal_GAC-	yes	-0.593048	3.94	0.183393	3.23	0.279851	3.14	0.364884	4.78	-0.0879161	0.222686	0.479791	0.428795	-0.327797	0.223375	0.793941	0.67741	-0.204828	0.322367	YES	0.0673848	0.454293	YES	-0.0522112	0.735675	YES	0.527195	0.116797	Null	-0.400978	0.224359	Null
255	chr7:19886593-19886678	n-Ts2|chr7_86_tRNASeC(e)_TCA+	yes	3.9665	0	4.24578	0	6.65464	0	7.22446	0	2.37285	1.85345	4.80257	4.68753	2.11187	2.00999	3.54661	3.78548	4.10614	6.93955	NO	2.11315	4.74505	NO	2.06093	3.66604	NO	2.83341	2.18202397303704e-09	Up	1.02678	0.00030489	Up
258	chr7:29158018-29158112	n-Ti16|chr7_156_tRNAIle_TAT_I+	yes	4.2173	0	4.7489	0	5.99793	0	6.37603	0	2.05941	2.16466	4.12717	4.16952	2.57604	2.98594	2.92703	3.2088	4.4831	6.18698	NO	2.11203	4.14834	NO	2.78099	3.06791	NO	1.70388	7.20217598385637e-06	Up	1.74939	3.20233649613959e-10	Up
259	chr7:29579007-29579079	n-Tk24|chr7_1276_tRNALys_TTT-	yes	1.76762	0	1.26719	0	4.13934	0	4.53797	0	0.406421	0.51993	2.72419	2.74336	1.01829	0.660493	1.89645	2.08515	1.51741	4.33865	NO	0.463175	2.73377	YES	0.839394	1.9908	NO	2.82125	2.35278637740022e-09	Up	1.11919	7.64028193831014e-05	Up
260	chr7:36019789-36019862	n-Tt9|chr7_1213_tRNAThr_AGT-	yes	4.19124	0	4.12045	0	5.17792	0	5.56619	0	2.08558	1.49572	3.18371	3.47215	2.22411	2.05788	1.91343	2.35109	4.15585	5.37206	NO	1.79065	3.32793	NO	2.14099	2.13226	NO	1.21621	0.000325704	Up	1.54601	2.28138440445592e-08	Up
264	chr7:65654685-65654756	n-Te17|chr7_337_tRNAGlu_TTC+	yes	3.8653	0	4.2894	0	4.05181	0	4.79108	0	1.84222	1.76998	2.3984	2.48831	2.06887	2.40057	1.17097	1.43545	4.07735	4.42144	NO	1.8061	2.44335	NO	2.23472	1.30321	NO	0.344094	0.322719	Null	1.56876	1.45226749560477e-08	Up
265	chr7:86611305-86611377	n-Tr19|chr7_387_tRNAArg_TCG+	yes	4.96567	0	4.65279	0	6.03443	0	6.50684	0	2.52664	1.84488	3.95834	4.05915	3.08316	2.73557	2.94378	3.12301	4.80923	6.27063	NO	2.18576	4.00874	NO	2.90936	3.03339	NO	1.46141	4.86154308330649e-05	Up	1.69895	9.33965903737133e-10	Up
266	chr7:105963925-105963996	n-Tp18|chr7_441_tRNAPro_TGG+	yes	4.53376	0	4.81231	0	5.87084	0	6.47679	0	2.46865	2.10375	3.88175	3.95274	2.84697	2.9947	2.69885	2.92448	4.67304	6.17382	NO	2.2862	3.91725	NO	2.92084	2.81166	NO	1.50078	4.2298696521701e-05	Up	1.74023	3.88699457967984e-10	Up
267	chr7:105964186-105964257	n-Tp7|chr7_977_tRNAPro_AGG-	yes	3.62963	0	4.24561	0	5.44567	0	6.08979	0	1.43978	1.56424	3.36845	3.44962	1.97921	2.45573	2.25866	2.39618	3.93762	5.76773	NO	1.50201	3.40904	NO	2.21747	2.32742	NO	1.83011	5.06418229348313e-06	Up	1.79708	1.20101618905874e-10	Up
268	chr7:106692410-106692481	n-Te3|chr7_967_tRNAGlu_CTC-	yes	-0.330512	0	0.0110734	0	0.278433	0	-0.0716532	0	-0.316176	-0.387108	0.45631	-0.161101	-0.170887	0.0209809	-0.115704	0.265749	-0.159719	0.10339	YES	-0.351642	0.147604	YES	-0.0749532	0.0750223	YES	0.263109	0.428741	Null	0.349271	0.305826	Null
270	chr7:127978993-127979074	n-Tl27|chr7_861_tRNALeu_TAG-	yes	4.16956	0	4.65009	0	5.83429	0	6.26312	0	1.85462	1.96704	3.9669	3.83351	2.12378	2.75469	2.67797	2.89016	4.40983	6.04871	NO	1.91083	3.90021	NO	2.43923	2.78406	NO	1.63888	1.22373898231264e-05	Up	1.64455	2.85723371457159e-09	Up
272	chr7:128061031-128061112	n-Tl4|chr7_559_tRNALeu_AAG+	yes	3.9915	0	3.64467	0	5.43175	0	5.91272	0	1.71959	0.8993	3.23827	3.38224	2.35324	1.97016	2.35581	2.55208	3.81809	5.67223	NO	1.30944	3.31025	NO	2.1617	2.45394	NO	1.85415	1.84291945426674e-06	Up	1.70857	7.53505326821385e-10	Up
279	chr8:39276255-39276337	n-Tl14|chr8_168_tRNALeu_CAG+	yes	-0.174612	9.99	-0.316474	17.18	-0.492552	28.47	0.31319	8.02	-0.0953404	-0.344471	-0.532784	-0.226391	-0.248568	-0.449904	-0.345513	-0.56456	-0.245543	-0.089681	YES	-0.219905	-0.379587	YES	-0.349236	-0.455036	YES	0.155862	0.675139	Null	-0.0538814	0.902768	Null
281	chr8:82433177-82433249	n-Tk20|chr8_317_tRNALys_TTT+	yes	0.26645	0	-0.238544	0	0.183831	0	-0.335836	0	-0.0670986	0.201504	-0.503687	-0.122973	0.295835	-0.141743	0.0215482	-0.59818	0.0139531	-0.0760026	YES	0.0672028	-0.31333	YES	0.077046	-0.288316	YES	-0.0899557	0.812081	Null	-0.0151713	0.983768	Null
284	chr8:97227531-97227613	n-Tl17|chr8_414_tRNALeu_CAG+	yes	4.41478	0	5.05908	0	5.75187	0	6.34164	0	1.86166	2.10827	4.11522	4.07318	2.58209	3.26737	3.00114	2.78804	4.73693	6.04676	NO	1.98496	4.0942	NO	2.92473	2.89459	NO	1.30983	0.000334483	Up	2.13936	1.06037647958552e-13	Up
285	chr8:97227904-97227986	n-Tl16|chr8_1008_tRNALeu_CAG-	yes	5.14035	0	5.74623	0	4.52743	0	5.23199	0	2.96446	2.87518	3.11023	2.90129	3.45132	3.88419	1.85163	1.89707	5.44329	4.87971	NO	2.91982	3.00576	NO	3.66776	1.87435	NO	-0.563579	0.104194	Null	1.87934	2.01874268182371e-11	Up
286	chr8:113154453-113154523	n-Tg16|chr8_887_tRNAGly_GCC-	yes	0.673123	0	0.290571	0	1.6864	0	2.1225	0	-0.156923	-0.503217	0.170484	0.583238	0.2185	-0.215696	-0.148806	-0.0350719	0.481847	1.90445	NO	-0.33007	0.376861	YES	0.00140162	-0.0919387	YES	1.4226	6.89182882182732e-05	Up	0.800271	0.00630614	Null
287	chr8:113155146-113155216	n-Tg15|chr8_886_tRNAGly_GCC-	yes	1.07036	0	0.494692	0	0.937332	0	1.69568	0	0.598722	-0.189304	0.231513	0.158087	0.656061	0.237355	-0.402165	-0.206822	0.782525	1.31651	YES	0.204709	0.1948	YES	0.446708	-0.304494	YES	0.533982	0.12505	Null	0.741293	0.0122988	Null
289	chr8:113586461-113586531	n-Tg10|chr8_560_tRNAGly_GCC+	yes	3.97604	0	3.62503	0	5.16581	0	5.94524	0	1.61014	1.1586	3.35738	3.52814	2.20305	2.02564	2.27448	2.63003	3.80054	5.55553	NO	1.38437	3.44276	NO	2.11434	2.45225	NO	1.75499	8.04472701378242e-06	Up	1.72047	5.99786085933919e-10	Up
290	chr8:124103129-124103201	n-Tm17|chr8_783_tRNAMet_CAT-	yes	4.73155	0	5.17185	0	6.07606	0	6.48176	0	2.57802	2.48752	4.08195	4.15868	3.04119	3.35459	2.90094	3.24201	4.9517	6.27891	NO	2.53277	4.12031	NO	3.19789	3.07147	NO	1.32721	0.00016508	Up	1.71396	6.97954428715103e-10	Up
342	chr9:14762877-14762949	n-Tk4|chr9_1514_tRNALys_CTT-	yes	0.131911	0	-0.245661	0	0.115719	0	-0.12485	0	0.419341	-0.146222	-0.286676	0.00919846	0.185724	-0.126487	-0.390995	-0.326729	-0.0568749	-0.00456547	YES	0.13656	-0.138739	YES	0.0296184	-0.358862	YES	0.0523094	0.892996	Null	0.113182	0.780421	Null
346	chr9:64585853-64585924	n-Tq9|chr9_342_tRNAGln_CTG+	yes	5.08302	0	5.38205	0	6.60305	0	7.20441	0	2.99761	2.6978	4.75747	4.69283	3.65082	3.52755	3.54219	3.81516	5.23254	6.90373	NO	2.84771	4.72515	NO	3.58919	3.67868	NO	1.6712	9.86295665448215e-06	Up	1.78795	1.40106871157516e-10	Up
350	chr9:74956737-74956819	n-Ta4|chr9_1100_tRNAAla_AGC-	yes	-0.244006	0	0.0896617	0	-0.290258	0	-0.0923438	0	0.24666	0.118232	0.202293	-0.301316	0.0434603	0.0688067	-0.215177	-0.232251	-0.0771719	-0.191301	YES	0.182446	-0.0495112	YES	0.0561335	-0.223714	YES	-0.114129	0.747587	Null	0.0478903	0.914809	Null
352	chr9:90021347-90021419	n-Tk18|chr9_1035_tRNALys_CTT-	yes	4.6515	0	4.4737	0	5.56835	0	6.23132	0	2.10583	1.65659	3.80482	3.7948	3.14441	2.80394	2.92252	2.9617	4.5626	5.89983	NO	1.88121	3.79981	NO	2.97418	2.94211	NO	1.33723	0.000178437	Up	1.95067	3.86231585614344e-12	Up
353	chr9:104302450-104302521	n-Tc47|chr9_592_tRNACys_GCA+	yes	-0.0557647	0	-0.0360117	0	1.185	0	1.88708	0	-0.180854	0.238988	0.71515	1.2	-0.337267	-0.148837	0.621551	0.782109	-0.0458882	1.53604	YES	0.0290671	0.957577	YES	-0.243052	0.70183	YES	1.58193	2.26792263289583e-05	Up	-0.0163717	0.981267	Null
354	chr9:104306386-104306457	n-Tc53|chr9_593_tRNACys_GCA+	yes	-0.0018025	0	-0.0534756	0	0.518851	0	1.33919	0	0.230314	-0.338243	0.391502	0.66086	0.446642	0.232005	0.399348	0.590556	-0.0276391	0.929019	YES	-0.0539645	0.526181	YES	0.339323	0.494952	YES	0.956658	0.00561196	Null	0.424517	0.195555	Null
355	chr9:104310997-104311068	n-Te18|chr9_961_tRNAGlu_TTC-	yes	0.641223	0	1.07923	0	-0.0201066	0	-0.218348	0	-0.0131464	0.238988	-0.482196	-0.78194	0.0908189	0.302402	-0.275799	-0.569075	0.860224	-0.119227	YES	0.112921	-0.632068	YES	0.19661	-0.422437	YES	-0.979451	0.00292257	Down	-0.125942	0.755245	Null
358	chr9:123438543-123438615	n-Tr2|chr9_783_tRNAArg_ACG-	yes	4.90604	0	4.7616	0	5.9361	0	6.26671	0	2.7071	1.87782	3.96608	4.13867	3.02548	2.92958	2.96366	3.1445	4.83382	6.10141	NO	2.29246	4.05237	NO	2.97753	3.05408	NO	1.26759	0.000197201	Up	1.68336	1.28862449033556e-09	Up
361	chr10:12642369-12642451	n-Tl25|chr10_1316_tRNALeu_TAA-	yes	4.24597	0	4.28801	0	5.26845	0	5.68392	0	1.89547	1.45988	3.23805	3.32836	2.13171	2.09848	2.14757	2.57871	4.26699	5.47618	NO	1.67768	3.28321	NO	2.1151	2.36314	NO	1.2092	0.000355676	Up	1.35749	1.07127728979681e-06	Up
363	chr10:23496889-23496960	n-Tw1|chr10_1282_tRNATrp_CCA-	yes	0.43419	8.99	0.114611	9.19	-0.0875085	16.85	0.0617035	17.68	0.527026	-0.00533873	-0.0396353	-0.0345945	0.102743	-0.207794	-0.445203	-0.0982492	0.274401	-0.0129025	YES	0.260844	-0.0371149	YES	-0.0525256	-0.271726	YES	-0.287303	0.378201	Null	-0.0787579	0.849819	Null
364	chr10:30530946-30531017	n-Te9|chr10_81_tRNAGlu_CTC+	yes	4.97648	0	4.72032	0	5.51084	0	6.22916	0	2.37437	1.8853	3.68725	3.7299	3.08941	2.70081	2.55377	2.41348	4.8484	5.87	NO	2.12983	3.70858	NO	2.89511	2.48362	NO	1.0216	0.00298583	Up	1.99023	1.87395349258015e-12	Up
365	chr10:61853872-61853944	n-Ta6|chr10_1120_tRNAAla_AGC-	yes	-0.0564105	0	0.120746	0	-0.49376	0	-0.21467	0	0.188115	-0.469804	-0.619639	-0.892396	-0.340545	-0.343203	-0.639113	-0.705118	0.0321676	-0.354215	YES	-0.140845	-0.756018	YES	-0.341874	-0.672116	YES	-0.386383	0.224177	Null	-0.284931	0.414567	Null
367	chr10:62656988-62657080	n-Tm18|chr10_1101_tRNAMet_CAT_I-	yes	0.110446	0	0.127923	0	-0.663619	0	-0.492012	0	-0.475481	-0.386772	-0.648554	-0.681403	0.116501	-0.251113	-0.343071	-0.715122	0.119185	-0.577815	YES	-0.431126	-0.664978	YES	-0.0673058	-0.529097	YES	-0.697	0.0258603	Null	0.227939	0.530262	Null
369	chr10:62892224-62892305	n-Ts26|chr10_1095_tRNASer_TGA-	yes	4.4945	0	4.5471	0	4.94369	0	5.20631	0	2.56738	1.66649	3.1072	3.15249	3.01796	2.79434	1.88324	2.33813	4.5208	5.075	NO	2.11693	3.12985	NO	2.90615	2.11068	NO	0.554203	0.0777053	Null	1.80838	9.41768868735971e-11	Up
372	chr10:77846390-77846462	n-Ta5|chr10_979_tRNAAla_AGC-	yes	0.280501	0	0.0481519	0	0.227503	0	-0.344515	0	0.274708	-0.0254692	-0.668	-0.204687	0.281248	0.0017102	-0.397301	-0.10396	0.164326	-0.0585057	YES	0.124619	-0.436343	YES	0.141479	-0.25063	YES	-0.222832	0.517893	Null	-0.168853	0.66189	Null
376	chr10:79711709-79711781	n-Tf3|chr10_961_tRNAPhe_GAA-	yes	4.77809	0	5.61685	0	6.84042	0	7.15454	0	2.62089	2.86563	4.86283	4.89944	3.05529	3.78891	3.61352	3.87616	5.19747	6.99748	NO	2.74326	4.88114	NO	3.4221	3.74484	NO	1.80001	6.39157177991671e-06	Up	1.81513	8.10429548311498e-11	Up
377	chr10:79711904-79711977	n-Tn7|chr10_381_tRNAAsn_GTT+	yes	4.54866	0	5.19962	0	5.6988	0	5.99047	0	2.46846	2.44423	3.73765	3.79265	2.86152	3.34556	2.54695	2.88863	4.87414	5.84464	NO	2.45635	3.76515	NO	3.10354	2.71779	NO	0.970499	0.00424315	Up	1.69455	1.0215733170718e-09	Up
379	chr10:87292631-87292703	n-Tk21|chr10_885_tRNALys_TTT-	yes	-0.00187609	0	-0.153298	0	0.82874	0	1.03871	0	0.225562	0.313994	0.504581	0.769658	-0.297543	-0.170846	1.18829	0.393404	-0.0775869	0.933725	YES	0.269778	0.63712	YES	-0.234194	0.790845	YES	1.01131	0.00183186	Up	-0.657698	0.0296125	Null
380	chr10:90644157-90644228	n-Tw2|chr10_857_tRNATrp_CCA-	yes	4.28815	0	4.17373	0	4.89471	0	5.34383	0	2.33935	1.69774	3.11106	3.07513	2.48173	2.3822	1.96942	2.31994	4.23094	5.11927	NO	2.01855	3.0931	NO	2.43197	2.14468	NO	0.888332	0.00635854	Null	1.36184	9.89298967742923e-07	Up
381	chr10:90644842-90644913	n-Td16|chr10_856_tRNAAsp_GTC-	yes	4.53666	0	5.50437	0	5.76916	0	6.37728	0	2.23709	2.57785	3.8785	3.99303	2.5924	3.22424	2.44868	2.95022	5.02051	6.07322	NO	2.40747	3.93577	NO	2.90832	2.69945	NO	1.05271	0.00458477	Up	1.73717	4.16040235224488e-10	Up
382	chr10:92915723-92915794	n-Td8|chr10_851_tRNAAsp_GTC-	yes	4.15615	0	4.54598	0	5.17425	0	5.66069	0	2.31545	2.12625	3.21286	3.49458	2.76005	2.96851	2.42629	2.61368	4.35106	5.41747	NO	2.22085	3.35372	NO	2.86428	2.51998	NO	1.0664	0.00167209	Up	1.47716	9.57561090449053e-08	Up
387	chr10:127895520-127895601	n-Ts13|chr10_688_tRNASer_CGA-	yes	4.59347	0	4.61788	0	5.60662	0	5.88094	0	2.27045	2.18205	3.6417	3.67579	2.86625	2.8201	2.60228	2.78229	4.60567	5.74378	NO	2.22625	3.65874	NO	2.84318	2.69228	NO	1.13811	0.000586813	Up	1.58339	1.06407089847314e-08	Up
388	chr11:7769780-7769851	n-Td10|chr11_69_tRNAAsp_GTC+	yes	0.152296	32.26	0.194237	26.6	-0.609538	20.53	-0.73563	29.3	0.406195	-0.261804	-0.370815	-0.328737	0.0588014	-0.16442	-0.53908	-0.52116	0.173267	-0.672584	YES	0.0721953	-0.349776	YES	-0.0528092	-0.53012	YES	-0.845851	0.00746724	Null	0.0553396	0.898971	Null
389	chr11:48632044-48632116	n-Tv15|chr11_204_tRNAVal_CAC+	yes	4.79671	0	4.42991	0	6.39982	0	6.72298	0	2.36398	1.63649	4.4519	4.48679	2.85907	2.68983	3.14418	3.40939	4.61331	6.5614	NO	2.00024	4.46934	NO	2.77445	3.27678	NO	1.94809	6.81245759184946e-07	Up	1.96678	2.83971677818441e-12	Up
390	chr11:48637230-48637303	n-Tg1|chr11_205_tRNAGly_ACC+	yes	4.06092	0	3.56254	0	5.27634	0	5.91545	0	1.77071	0.949934	3.31594	3.48072	2.46388	1.93318	2.44726	2.51634	3.81173	5.59589	NO	1.36032	3.39833	NO	2.19853	2.4818	NO	1.78416	5.70776130387382e-06	Up	1.75474	2.88029316476509e-10	Up
391	chr11:48647385-48647457	n-Tk10|chr11_2023_tRNALys_CTT-	yes	4.73469	0	5.25747	0	6.29158	0	6.62564	0	2.3985	2.47352	4.49604	4.46976	2.95069	3.41186	3.08752	3.51766	4.99608	6.45861	NO	2.43601	4.4829	NO	3.18128	3.30259	NO	1.46253	5.31365320667201e-05	Up	1.92557	7.03586253523427e-12	Up
392	chr11:48647931-48648002	n-Ta38|chr11_2022_tRNAAla_TGC-	yes	5.59041	0	5.3961	0	6.30055	0	6.62612	0	3.44527	2.7924	4.53655	4.58999	3.97141	3.73203	3.29473	3.79695	5.49325	6.46333	NO	3.11883	4.56327	NO	3.85172	3.54584	NO	0.970081	0.00287873	Up	1.75032	3.15955149873576e-10	Up
393	chr11:48667121-48667193	n-Tt16|chr11_206_tRNAThr_TGT+	yes	5.17617	0	5.28361	0	6.09788	0	6.3919	0	2.75285	2.50663	4.23699	4.19841	3.31444	3.42719	3.0332	3.29429	5.22989	6.24489	NO	2.62974	4.2177	NO	3.37082	3.16374	NO	1.015	0.00184008	Up	1.79503	1.23709249952033e-10	Up
394	chr11:48669782-48669853	n-Tp14|chr11_207_tRNAPro_TGG+	yes	4.15939	0	4.61046	0	6.45158	0	7.10314	0	2.11847	2.10774	4.72584	4.61151	2.59914	2.82178	3.3102	3.38997	4.38492	6.77736	NO	2.1131	4.66868	NO	2.71046	3.35009	NO	2.39244	6.01891077796863e-08	Up	1.91594	8.18014111111313e-12	Up
395	chr11:48670139-48670211	n-Tv7|chr11_208_tRNAVal_AAC+	yes	4.69218	0	4.90984	0	6.67867	0	7.16299	0	2.59908	2.25586	4.80686	4.71945	3.16997	3.18916	3.38971	3.54387	4.80101	6.92083	NO	2.42747	4.76315	NO	3.17957	3.46679	NO	2.11982	1.9808748342065e-07	Up	2.04846	8.22451748607885e-13	Up
396	chr11:48670476-48670557	n-Tl6|chr11_2021_tRNALeu_AAG-	yes	3.59344	0	3.20091	0	5.71249	0	6.23281	0	1.37614	0.471385	3.82573	3.81236	2.17217	1.6028	2.56665	2.78476	3.39717	5.97265	NO	0.923762	3.81905	YES	1.88749	2.67571	NO	2.57547	1.14282998407092e-08	Up	2.10707	2.0313636539954e-13	Up
401	chr11:51790041-51790112	n-Ta1|chr11_238_tRNAAla_AGC+	yes	-0.458289	0	-0.0903304	0	-0.520013	0	-0.287395	0	-0.582242	-0.0455467	-0.412543	-0.243667	-0.546403	0.208847	-0.110665	-0.560251	-0.27431	-0.403704	YES	-0.313894	-0.328105	YES	-0.168778	-0.335458	YES	-0.129394	0.713687	Null	0.15247	0.698203	Null
402	chr11:58115679-58115750	n-Te10|chr11_1912_tRNAGlu_CTC-	yes	5.15162	0	5.22824	0	5.53823	0	5.88313	0	2.9507	2.52449	3.60822	3.79179	3.38894	3.2928	2.50912	2.90189	5.18993	5.71068	NO	2.73759	3.7	NO	3.34087	2.7055	NO	0.52075	0.0996159	Null	1.59778	7.73053538201276e-09	Up
403	chr11:58115976-58116082	n-Tl12|chr11_1911_tRNALeu_CAA_I-	yes	4.7183	0	4.83522	0	3.70858	0	3.91328	0	2.70738	2.32889	2.41507	2.69464	3.05017	3.03315	1.16253	1.30774	4.77676	3.81093	NO	2.51813	2.55486	NO	3.04166	1.23513	NO	-0.965834	0.00270589	Down	1.84325	4.3964455549538e-11	Up
404	chr11:61221418-61221489	n-Tw5|chr11_1880_tRNATrp_CCA-	yes	4.99301	0	4.92893	0	5.38178	0	5.54938	0	2.26552	1.59706	3.46531	3.512	2.77216	2.70739	2.22676	2.72892	4.96097	5.46558	NO	1.93129	3.48865	NO	2.73977	2.47784	NO	0.504612	0.105752	Null	1.8193	7.47138454721607e-11	Up
405	chr11:62559517-62559588	n-Tw8|chr11_1849_tRNATrp_CCA-	yes	1.60285	0	0.874641	0	0.0786908	0	0.549013	0	-0.19821	-0.24048	0.00117597	0.0457503	0.699112	-0.125356	-0.335986	-0.247212	1.23874	0.313852	NO	-0.219345	0.0234631	YES	0.286878	-0.291599	YES	-0.924893	0.00775056	Null	0.821284	0.00494224	Up
406	chr11:67104641-67104712	n-Tp12|chr11_372_tRNAPro_TGG+	yes	-0.16611	0	0.488759	0	0.243719	0	0.241154	0	0.139	0.413114	0.147779	-0.126449	0.0808938	0.186923	0.157067	0.249633	0.161324	0.242436	YES	0.276057	0.010665	YES	0.133909	0.20335	YES	0.0811124	0.832183	Null	-0.334833	0.329119	Null
407	chr11:68850505-68850578	n-Ti5|chr11_393_tRNAIle_AAT+	yes	4.40571	0	5.03065	0	5.76364	0	6.30768	0	2.46595	2.55472	4.01737	3.94146	3.03966	3.35832	2.78122	2.80623	4.71818	6.03566	NO	2.51034	3.97941	NO	3.19899	2.79372	NO	1.31748	0.000284177	Up	1.87434	2.22462357839775e-11	Up
408	chr11:68850979-68851060	n-Ts4|chr11_394_tRNASer_AGA+	yes	4.76924	0	4.95194	0	5.51891	0	6.02615	0	2.52832	2.48308	3.72281	3.69234	3.20936	3.265	2.36032	2.57283	4.86059	5.77253	NO	2.5057	3.70757	NO	3.23718	2.46657	NO	0.911937	0.00560424	Null	1.97248	2.77119784543793e-12	Up
409	chr11:68851355-68851428	n-Tt8|chr11_395_tRNAThr_AGT+	yes	4.54754	0	5.02449	0	6.68904	0	7.18391	0	2.11313	2.49156	4.85893	4.87323	2.54724	3.05261	3.52743	3.75466	4.78601	6.93647	NO	2.30234	4.86608	NO	2.79993	3.64105	NO	2.15046	2.31427876416478e-07	Up	1.72262	5.78894045175335e-10	Up
410	chr11:68853887-68853958	n-Tp9|chr11_396_tRNAPro_CGG+	yes	3.69273	0	4.35131	0	2.7997	0	3.36993	0	1.83018	1.7768	1.5113	1.71554	2.2785	2.77191	0.345242	0.38506	4.02202	3.08482	NO	1.80349	1.61342	NO	2.52521	0.365151	NO	-0.937203	0.00708455	Null	1.96999	2.83971677818441e-12	Up
411	chr11:68854486-68854557	n-Td9|chr11_397_tRNAAsp_GTC+	yes	5.71821	0	5.90245	0	6.69474	0	7.07159	0	3.04741	2.97999	4.7782	4.8726	3.87384	3.85375	3.49961	3.66244	5.81033	6.88316	NO	3.0137	4.8254	NO	3.86379	3.58102	NO	1.07284	0.00121311	Up	2.09448	2.31230214283083e-13	Up
412	chr11:68854780-68854851	n-Tg25|chr11_1824_tRNAGly_TCC-	yes	5.02385	0	5.30055	0	6.51191	0	6.8557	0	2.66685	2.51898	4.65528	4.66852	3.3579	3.45318	3.37781	3.49026	5.1622	6.6838	NO	2.59291	4.6619	NO	3.40554	3.43404	NO	1.52161	2.26792263289583e-05	Up	2.04049	8.67006291786834e-13	Up
413	chr11:68855328-68855399	n-Tw7|chr11_398_tRNATrp_CCA+	yes	4.4513	0	4.53806	0	6.29146	0	6.65846	0	2.53254	1.95326	4.49424	4.66387	2.82678	2.69116	3.46899	3.61228	4.49468	6.47496	NO	2.2429	4.57905	NO	2.75897	3.54064	NO	1.98027	4.28278033715216e-07	Up	1.55449	1.92041581559121e-08	Up
414	chr11:68875822-68875895	n-Ti4|chr11_1823_tRNAIle_AAT-	yes	4.69002	0	5.31013	0	6.57021	0	6.95871	0	2.41108	2.582	4.8225	4.70773	2.96641	3.37671	3.49556	3.6389	5.00008	6.76446	NO	2.49654	4.76511	NO	3.17156	3.56723	NO	1.76438	5.44516936697321e-06	Up	1.8729	2.27018448977396e-11	Up
415	chr11:68876246-68876319	n-Tt7|chr11_1822_tRNAThr_AGT-	yes	5.18318	0	5.85936	0	6.63415	0	7.04852	0	2.88363	3.07216	4.9031	4.84115	3.28454	4.09327	3.68691	3.95491	5.52127	6.84133	NO	2.97789	4.87212	NO	3.6889	3.82091	NO	1.32006	0.000257385	Up	1.76223	2.48073478545023e-10	Up
416	chr11:68876544-68876625	n-Ts17|chr11_1821_tRNASer_GCT-	yes	5.73958	0	6.00014	0	6.33577	0	6.58445	0	3.39089	3.22076	4.71088	4.67057	3.79601	4.19518	3.53788	3.85863	5.86986	6.46011	NO	3.30583	4.69072	NO	3.9956	3.69826	NO	0.590254	0.0625529	Null	1.68223	1.30476258022091e-09	Up
417	chr11:68876997-68877068	n-Tw6|chr11_1820_tRNATrp_CCA-	yes	3.25266	0	3.54318	0	4.36916	0	4.93291	0	0.799213	1.30569	2.26365	2.46228	1.26539	1.65819	1.47311	1.62127	3.39792	4.65103	NO	1.05245	2.36297	YES	1.46179	1.54719	NO	1.25311	0.000334483	Up	1.22512	1.26645610844199e-05	Up
419	chr11:68923967-68924040	n-Tt5|chr11_399_tRNAThr_AGT+	yes	3.88414	0	3.90489	0	3.21752	0	3.72533	0	1.84554	1.40625	1.47335	1.60563	2.3308	2.63914	1.28124	1.15555	3.89451	3.47142	NO	1.6259	1.53949	NO	2.48497	1.21839	NO	-0.423089	0.190623	Null	1.18016	2.81000563674084e-05	Up
420	chr11:68924421-68924502	n-Ts14|chr11_400_tRNASer_CGA+	yes	3.84072	0	3.61747	0	2.92655	0	3.63772	0	1.57514	1.1025	1.28886	1.66826	2.07741	1.7406	0.453473	0.807273	3.72909	3.28213	NO	1.33882	1.47856	NO	1.909	0.630373	NO	-0.446959	0.183359	Null	1.41837	3.22023252643805e-07	Up
421	chr11:68932296-68932366	n-Tg13|chr11_1819_tRNAGly_GCC-	yes	4.65193	0	4.94347	0	5.47678	0	5.92217	0	2.29793	2.01364	3.70721	3.76148	2.79734	2.86208	2.38714	2.54796	4.7977	5.69947	NO	2.15578	3.73435	NO	2.82971	2.46755	NO	0.901772	0.00607289	Null	1.94072	4.97421831677839e-12	Up
422	chr11:68936984-68937070	n-Tr25|chr11_1818_tRNAArg_TCT_I-	yes	3.29682	0	3.4791	0	4.92202	0	5.55596	0	1.09762	1.42364	2.93668	2.98997	1.77383	1.99697	1.90867	2.04259	3.38796	5.23899	NO	1.26063	2.96332	NO	1.8854	1.97563	NO	1.85103	2.22033409496788e-06	Up	1.61247	5.66522378252991e-09	Up
423	chr11:68937743-68937824	n-Tl29|chr11_401_tRNALeu_TAG+	yes	5.02718	0	5.56417	0	6.11068	0	6.50443	0	2.70552	2.79076	4.31108	4.30366	3.29448	3.73989	3.04417	3.26296	5.29567	6.30755	NO	2.74814	4.30737	NO	3.51718	3.15356	NO	1.01188	0.00281291	Up	1.92285	7.23056737842197e-12	Up
424	chr11:68938109-68938180	n-Tq6|chr11_1817_tRNAGln_CTG-	yes	3.7926	0	3.87638	0	6.97184	0	7.79331	0	1.419	1.59331	5.42945	5.33971	2.23333	2.36944	3.99254	3.96615	3.83449	7.38258	NO	1.50616	5.38458	NO	2.30139	3.97934	NO	3.54809	1.25135334905853e-10	Up	2.20047	1.974981842553e-14	Up
425	chr11:68938678-68938750	n-Tk27|chr11_1816_tRNALys_TTT-	yes	4.9199	0	5.11771	0	6.45475	0	6.89822	0	2.75027	2.69724	4.71846	4.50313	3.30171	3.22648	3.34	3.4435	5.0188	6.67648	NO	2.72375	4.6108	NO	3.26409	3.39175	NO	1.65768	7.46801512437925e-06	Up	1.75939	2.61121584515413e-10	Up
427	chr11:73950817-73950889	n-Tk5|chr11_1752_tRNALys_CTT-	yes	-0.198404	0	-0.0475751	0	-0.247061	0	-0.497646	0	-0.109265	0.183777	-0.259599	-0.388805	-0.0904949	0.0584313	0.237335	0.139085	-0.12299	-0.372354	YES	0.0372556	-0.324202	YES	-0.0160318	0.18821	YES	-0.249364	0.445969	Null	-0.5657	0.0696654	Null
431	chr11:79518152-79518223	n-Tt12|chr11_550_tRNAThr_CGT+	yes	3.96711	0	4.51993	0	5.17522	0	5.45641	0	1.54718	1.67172	3.01748	3.30482	2.04313	2.58264	2.14126	2.47137	4.24352	5.31582	NO	1.60945	3.16115	NO	2.31288	2.30631	NO	1.0723	0.00158899	Up	1.55827	1.77926504082394e-08	Up
432	chr11:86075670-86075741	n-Tq12|chr11_630_tRNAGln_TTG+	yes	-0.207876	0	0.0317169	0	-0.484702	0	0.186219	0	-0.644376	0.0217245	-0.347146	-0.00188005	-0.42443	-0.00556123	-0.315458	-0.397719	-0.0880793	-0.149242	YES	-0.311326	-0.174513	YES	-0.214995	-0.356588	YES	-0.0611622	0.88076	Null	0.278406	0.427145	Null
435	chr11:95720486-95720557	n-Tq16|chr11_1493_tRNAGln_TTG-	yes	4.44605	0	4.90717	0	5.27145	0	5.63308	0	2.24509	1.99406	3.16851	3.22635	2.69286	2.90452	2.10481	2.31271	4.67661	5.45227	NO	2.11957	3.19743	NO	2.79869	2.20876	NO	0.775657	0.0179826	Null	1.66779	1.75281138300528e-09	Up
436	chr11:97563763-97563836	n-Tn8|chr11_1446_tRNAAsn_GTT-	yes	3.93325	0	3.78913	0	5.04913	0	5.35896	0	1.87038	1.06294	3.06928	3.18605	2.20125	1.94309	2.00483	2.43523	3.86119	5.20404	NO	1.46666	3.12766	NO	2.07217	2.22003	NO	1.34285	9.77795758999119e-05	Up	1.51315	4.49972038960784e-08	Up
437	chr11:97631143-97631214	n-Tc18|chr11_1444_tRNACys_GCA-	yes	1.785	0	1.95217	0	4.57658	0	5.24464	0	0.426777	0.738647	2.84319	2.93407	0.716525	0.71126	1.88963	2.00309	1.86859	4.91061	NO	0.582712	2.88863	YES	0.713892	1.94636	NO	3.04202	8.25723208953585e-10	Up	1.07345	0.000150101	Up
439	chr11:97658386-97658457	n-Tc56|chr11_791_tRNACys_GCA+	yes	4.80805	0	4.70952	0	6.1906	0	6.65091	0	2.55216	2.23168	4.21043	4.18642	3.20277	2.9951	3.05122	3.3159	4.75879	6.42075	NO	2.39192	4.19842	NO	3.09894	3.18356	NO	1.66197	7.05787516336809e-06	Up	1.72188	5.84209947448985e-10	Up
440	chr11:97660220-97660291	n-Tc51|chr11_1442_tRNACys_GCA-	yes	3.82125	0	3.03049	0	5.49766	0	6.1444	0	1.85347	0.983113	3.76093	3.71261	2.32173	1.53974	2.43692	2.75711	3.42587	5.82103	NO	1.41829	3.73677	NO	1.93074	2.59701	NO	2.39516	1.25828170226791e-07	Up	1.65221	2.45584348329672e-09	Up
441	chr11:97849560-97849631	n-Tc55|chr11_1433_tRNACys_GCA-	yes	4.49983	0	5.11836	0	5.29803	0	5.72316	0	2.61147	2.58298	3.44862	3.38227	2.76858	3.25687	2.2136	2.44146	4.8091	5.51059	NO	2.59722	3.41545	NO	3.01273	2.32753	NO	0.701498	0.0366207	Null	1.50342	5.54781415445089e-08	Up
442	chr11:97850237-97850308	n-Tc54|chr11_1432_tRNACys_GCA-	yes	4.76912	0	5.1975	0	6.06151	0	6.31937	0	2.45164	2.47597	4.23066	4.31841	2.92482	3.03049	3.0559	3.30952	4.98331	6.19044	NO	2.46381	4.27453	NO	2.97766	3.18271	NO	1.20714	0.000404368	Up	1.60567	6.57339000459677e-09	Up
444	chr11:100399472-100399544	n-Ts23|chr11_832_tRNASer_GGA+	yes	-0.067503	0	0.132517	0	0.0937956	0	0.342877	0	-0.118108	0.308007	0.0386334	0.0630206	0.0708684	0.161594	-0.0254771	-0.122188	0.032507	0.218336	YES	0.0949496	0.050827	YES	0.116231	-0.0738327	YES	0.185829	0.583903	Null	0.145941	0.712725	Null
450	chr11:106874180-106874252	n-Tr7|chr11_945_tRNAArg_CCG+	yes	4.99477	0	5.11138	0	5.11813	0	5.33129	0	2.5191	2.29456	3.33011	3.40941	2.97726	2.91108	2.08856	2.31667	5.05307	5.22471	NO	2.40683	3.36976	NO	2.94417	2.20262	NO	0.171632	0.613864	Null	1.70449	8.27332116162644e-10	Up
451	chr11:115274295-115274367	n-Tr14|chr11_1022_tRNAArg_CCT+	yes	4.67645	0	5.13203	0	6.09488	0	6.47571	0	2.25822	2.26539	4.18792	4.31928	2.82086	3.10386	2.95628	3.37003	4.90424	6.28529	NO	2.26181	4.2536	NO	2.96236	3.16315	NO	1.38105	0.000102031	Up	1.791	1.33777705742404e-10	Up
452	chr11:115274618-115274690	n-Tr12|chr11_1234_tRNAArg_CCT-	yes	4.09116	0	4.13843	0	5.27292	0	5.57182	0	1.63125	1.16775	3.27529	3.47219	1.87569	1.91248	2.0743	2.58984	4.1148	5.42237	NO	1.3995	3.37374	NO	1.89408	2.33207	NO	1.30757	0.000129428	Up	1.53625	2.74747900846299e-08	Up
453	chr11:115275093-115275165	n-Tr18|chr11_1023_tRNAArg_TCG+	yes	4.6139	0	4.93139	0	6.27886	0	6.66414	0	2.18243	2.34818	4.43892	4.39001	2.95572	3.10777	3.16371	3.26437	4.77264	6.4715	NO	2.26531	4.41447	NO	3.03174	3.21404	NO	1.69886	5.52408859352646e-06	Up	1.96686	2.83971677818441e-12	Up
454	chr11:116277293-116277365	n-Ta3|chr11_1203_tRNAAla_AGC-	yes	0.447061	0	0.20919	0	-0.71826	0	-0.746503	0	0.383137	-0.0713274	-0.768099	-0.643425	0.114179	0.253282	-0.790418	-0.798549	0.328125	-0.732381	YES	0.155905	-0.705762	YES	0.18373	-0.794483	YES	-1.06051	0.0011622	Down	0.116547	0.774073	Null
455	chr11:121825376-121825448	n-Tm1|chr11_1132_tRNAMet_CAT-	yes	-0.180728	0	0.477055	0	-0.141225	0	-0.526955	0	-0.0676024	0.667711	-0.20406	-0.531609	0.0496913	0.345778	-0.0224656	-0.0833704	0.148164	-0.33409	YES	0.300054	-0.367835	YES	0.197735	-0.052918	YES	-0.482254	0.150231	Null	-0.417236	0.203801	Null
458	chr12:43516062-43516133	n-Te2|chr12_886_tRNAGlu_CTC-	yes	-0.0535584	0	0.109519	0	0.275123	0	0.104234	0	0.113295	0.063969	0.338578	0.14582	0.0780133	0.212895	0.308628	-0.111499	0.0279802	0.189678	YES	0.0886319	0.242199	YES	0.145454	0.0985644	YES	0.161698	0.636924	Null	0.200457	0.588996	Null
464	chr12:72070107-72070179	n-Tk17|chr12_790_tRNALys_CTT-	yes	4.59622	0	4.5396	0	6.47584	0	7.06429	0	2.35833	2.01058	4.69457	4.67793	2.86254	2.85686	3.15638	3.65999	4.56791	6.77006	NO	2.18446	4.68625	NO	2.8597	3.40819	NO	2.20215	1.27490991265475e-07	Up	1.95331	3.68675219691131e-12	Up
467	chr12:112083548-112083621	n-Ti6|chr12_470_tRNAIle_AAT+	yes	4.51305	0	4.75839	0	5.59869	0	6.02597	0	2.16883	2.37475	3.43035	3.53971	2.69834	2.99618	2.46931	2.89751	4.63572	5.81233	NO	2.27179	3.48503	NO	2.84726	2.68341	NO	1.1766	0.000529081	Up	1.37709	7.37040594340292e-07	Up
468	chr13:4223394-4223466	n-Tk6|chr13_1041_tRNALys_CTT-	yes	-0.0676617	0	-0.236711	1.03	-0.311236	0	-0.876111	0	-0.540452	-0.333049	-0.596939	-0.32567	-0.0748784	0.110691	-0.576065	-0.333028	-0.152186	-0.593673	YES	-0.436751	-0.461304	YES	0.0179061	-0.454546	YES	-0.441487	0.17637	Null	0.447899	0.168494	Null
470	chr13:21252654-21252725	n-Te11|chr13_1001_tRNAGlu_CTC-	yes	4.58296	0	5.16775	0	5.30504	0	5.71109	0	2.1866	2.33796	3.79448	3.79744	2.51647	3.04167	2.21434	2.3236	4.87536	5.50806	NO	2.26228	3.79596	NO	2.77907	2.26897	NO	0.632708	0.0571175	Null	2.04378	8.58538843068967e-13	Up
471	chr13:21253274-21253346	n-Tf4|chr13_60_tRNAPhe_GAA+	yes	3.95111	0	4.31927	0	4.35818	0	4.94026	0	1.80911	1.74071	3.26004	2.93155	1.98731	2.40657	1.92295	2.16307	4.13519	4.64922	NO	1.77491	3.0958	NO	2.19694	2.04301	NO	0.51403	0.120091	Null	1.47482	1.00317496531853e-07	Up
472	chr13:21259473-21259545	n-Tm14|chr13_61_tRNAMet_CAT+	yes	3.57771	0	3.55343	0	5.99032	0	6.72256	0	1.3262	1.00367	4.14969	4.29684	1.88178	2.0043	3.00448	3.23261	3.56557	6.35644	NO	1.16493	4.22327	YES	1.94304	3.11855	NO	2.79087	3.76687463039531e-09	Up	1.88283	1.87269540521185e-11	Up
473	chr13:21259944-21260016	n-Tk28|chr13_1000_tRNALys_TTT-	yes	4.24257	0	4.57363	0	0	0	0	0	1.88693	1.93744	0	0.0591039	2.54243	2.52364	0.0597632	0	4.4081	0	NO	1.91219	0.0295519	NO	2.53304	0.0298816	NO	-4.4081	9.06858747460922e-13	Down	0.620522	0.0429699	Null
474	chr13:21261556-21261628	n-Tm15|chr13_999_tRNAMet_CAT-	yes	4.96927	0	4.91816	0	2.45757	0	3.01109	0	2.77031	2.12939	1.94678	1.66595	3.15667	2.66279	1.04241	0.558513	4.94371	2.73433	NO	2.44985	1.80637	NO	2.90973	0.80046	NO	-2.20938	1.11197053168368e-07	Down	1.46579	1.2043917004964e-07	Up
475	chr13:21261905-21261986	n-Tl7|chr13_62_tRNALeu_AAG+	yes	4.96593	0	4.7437	0	5.28952	0	5.80702	0	2.88056	2.18307	3.6721	3.81596	3.28515	3.10104	2.63724	2.74665	4.85482	5.54827	NO	2.53182	3.74403	NO	3.1931	2.69195	NO	0.693452	0.0332355	Null	1.71336	6.97954428715103e-10	Up
476	chr13:21262075-21262156	n-Tl5|chr13_63_tRNALeu_AAG+	yes	4.86488	0	4.67242	0	5.3107	0	5.80702	0	2.75027	2.04704	3.50002	3.72772	3.24724	3.08808	2.63115	2.75911	4.76865	5.55886	NO	2.39866	3.61387	NO	3.16766	2.69513	NO	0.790212	0.0151813	Null	1.68775	1.17334208742101e-09	Up
477	chr13:21264220-21264291	n-Tq7|chr13_64_tRNAGln_CTG+	yes	4.38914	0	4.27934	0	4.5691	0	5.08668	0	2.21707	1.67797	2.63768	2.82754	2.89905	2.36713	1.44846	1.79816	4.33424	4.82789	NO	1.94752	2.73261	NO	2.63309	1.62331	NO	0.493654	0.125567	Null	1.79487	1.23709249952033e-10	Up
478	chr13:21264706-21264811	n-Tl9|chr13_998_tRNALeu_CAA_I-	yes	3.69287	0	3.54821	0	5.72555	0	6.32611	0	1.38667	0.907407	3.72269	3.86265	1.99229	1.68699	2.69431	2.85649	3.62054	6.02583	NO	1.14704	3.79267	YES	1.83964	2.7754	NO	2.40529	3.28423770301981e-08	Up	1.70986	7.35712307413747e-10	Up
479	chr13:21292073-21292177	n-Tl10|chr13_65_tRNALeu_CAA_I+	yes	4.95501	0	5.77672	0	4.96003	0	5.33662	0	2.57256	2.57887	3.4002	3.50936	3.19644	3.74462	2.28211	2.49919	5.36587	5.14832	NO	2.57571	3.45478	NO	3.47053	2.39065	NO	-0.217544	0.555345	Null	1.95895	3.33250544525756e-12	Up
480	chr13:21307327-21307399	n-Tr9|chr13_997_tRNAArg_CCG-	yes	4.09551	0	4.24854	0	4.94737	0	5.51957	0	1.39876	1.14823	3.11364	3.35453	2.21819	2.24891	2.04997	2.42304	4.17202	5.23347	NO	1.2735	3.23408	NO	2.23355	2.23651	NO	1.06145	0.00167209	Up	1.95763	3.35739532083293e-12	Up
481	chr13:21314455-21314526	n-Ta16|chr13_66_tRNAAla_AGC+	yes	4.40756	0	4.86484	0	4.50472	0	4.85484	0	2.1902	2.17856	2.93999	3.20101	2.53208	3.12164	1.88992	2.31016	4.6362	4.67978	NO	2.18438	3.0705	NO	2.82686	2.10004	NO	0.0435755	0.910138	Null	1.61294	5.63742340483829e-09	Up
482	chr13:21325914-21325985	n-Ta17|chr13_67_tRNAAla_AGC+	yes	4.8756	0	4.89003	0	3.35561	0	3.63801	0	2.68242	2.45956	2.16262	2.62889	3.08848	3.11589	1.31052	2.05147	4.88281	3.49681	NO	2.57099	2.39575	NO	3.10219	1.68099	NO	-1.386	6.23259075147639e-05	Down	1.24595	8.76445387966552e-06	Up
483	chr13:21332814-21332885	n-Ta40|chr13_68_tRNAAla_TGC+	yes	3.10294	0	2.45386	0	5.45178	0	6.29863	0	1.07784	0.83805	3.68812	3.85927	1.3528	1.03798	2.68974	2.56142	2.7784	5.87521	NO	0.957945	3.77369	YES	1.19539	2.62558	NO	3.09681	2.10841146436399e-09	Up	1.38556	6.24646786818281e-07	Up
484	chr13:21334439-21334510	n-Ta18|chr13_69_tRNAAla_AGC+	yes	1.83026	0	0.669122	0	1.57648	0	1.80119	0	0.421877	-0.144457	0.440377	0.294723	0.4756	-0.127277	0.271488	0.13243	1.24969	1.68884	NO	0.13871	0.36755	YES	0.174162	0.201959	YES	0.439144	0.235675	Null	0.201042	0.587952	Null
485	chr13:21341063-21341136	n-Tt3|chr13_996_tRNAThr_AGT-	yes	1.50286	0	1.37944	0	2.24248	0	2.65575	0	0.363734	0.78337	0.837005	1.233	0.269027	0.922965	0.656374	0.355452	1.44115	2.44911	NO	0.573552	1.035	YES	0.595996	0.505913	YES	1.00796	0.0022001	Up	0.551533	0.078075	Null
486	chr13:21346089-21346160	n-Ta28|chr13_70_tRNAAla_CGC+	yes	2.20433	0	1.72266	0	-0.145307	0	-0.0816712	0	0.259743	-0.196265	-0.262409	-0.29669	0.985528	0.468785	-0.0790319	-0.233321	1.9635	-0.113489	NO	0.031739	-0.27955	YES	0.727156	-0.156177	YES	-2.07699	2.4277750596858e-07	Down	0.572044	0.0660856	Null
487	chr13:21351637-21351708	n-Ta19|chr13_71_tRNAAla_AGC+	yes	3.72555	0	2.67433	0	0	0	0	0	1.53693	0.040141	0	0.0591039	1.60512	0.737256	0	0	3.19994	0	NO	0.788538	0.0295519	YES	1.17119	0	NO	-3.19994	1.13705952527243e-09	Down	0.412204	0.21035	Null
488	chr13:21356449-21356522	n-Tt11|chr13_72_tRNAThr_CGT+	yes	2.03968	0	2.12693	0	0.789917	0	1.23703	0	0.472697	0.6302	0.306802	0.450995	0.599939	0.910431	0.206559	0.0214532	2.0833	1.01348	NO	0.551449	0.378899	YES	0.755185	0.114006	YES	-1.06983	0.00129824	Down	0.468629	0.145463	Null
489	chr13:21360338-21360409	n-Tq13|chr13_995_tRNAGln_TTG-	yes	0.90046	0	1.08108	0	1.94281	0	2.31435	0	0.150445	0.20144	0.431725	0.684105	0.320976	-0.103784	-0.0898345	0.204934	0.990769	2.12858	NO	0.175943	0.557915	YES	0.108596	0.0575496	YES	1.13781	0.000668969	Up	0.433019	0.186133	Null
490	chr13:21367825-21367898	n-Tt18|chr13_73_tRNAThr_TGT+	yes	1.43114	0	0.931669	0	3.15101	0	3.76868	0	0.329851	0.418292	1.67137	1.31076	0.280285	0.11698	0.979121	1.36824	1.1814	3.45985	NO	0.374072	1.49107	YES	0.198633	1.17368	YES	2.27844	1.28949748218783e-07	Up	0.14195	0.718304	Null
491	chr13:21371565-21371637	n-Tr16|chr13_74_tRNAArg_TCG+	yes	2.75012	0	1.94038	0	5.92972	0	6.54617	0	0.843811	0.328378	3.87402	3.9715	1.13803	0.655968	2.89636	3.07737	2.34525	6.23795	NO	0.586094	3.92276	YES	0.897002	2.98686	NO	3.89269	5.33730136633132e-11	Up	1.2468	8.66039731975021e-06	Up
492	chr13:21414682-21414755	n-Tt13|chr13_75_tRNAThr_CGT+	yes	2.15697	0	1.902	0	4.20395	0	4.92762	0	0.440101	0.553117	2.54147	2.64867	0.530339	1.1175	1.21043	1.60828	2.02949	4.56578	NO	0.496609	2.59507	YES	0.82392	1.40936	YES	2.5363	2.09409366476233e-08	Up	1.51303	4.49972038960784e-08	Up
493	chr13:21418586-21418658	n-Tm13|chr13_994_tRNAMet_CAT-	yes	3.89938	0	4.08617	0	4.12793	0	4.66185	0	1.83866	1.41854	2.50589	2.4652	2.22433	2.01609	1.62402	1.52885	3.99278	4.39489	NO	1.6286	2.48555	NO	2.12021	1.57643	NO	0.402111	0.218845	Null	1.40073	4.6001166459018e-07	Up
494	chr13:21584714-21584795	n-Ts16|chr13_992_tRNASer_GCT-	yes	-0.809491	0	-0.18048	0	1.70089	0	2.0617	0	-0.61793	-0.266005	1.05397	0.179929	-0.507263	-0.000247907	0.555828	0.496584	-0.494985	1.8813	NO	-0.441967	0.616949	YES	-0.253756	0.526206	YES	2.37628	5.53151213295259e-08	Up	0.278955	0.426321	Null
495	chr13:21802449-21802519	n-Tg28|chr13_77_tRNAGly_GCC+	yes	4.29799	0	4.66825	0	3.72738	0	4.86485	0	2.15099	2.16996	3.12434	2.87116	2.7518	2.74389	1.04775	1.27571	4.48312	4.29611	NO	2.16048	2.99775	NO	2.74785	1.16173	NO	-0.187006	0.643017	Null	2.42339	2.52018594684225e-17	Up
496	chr13:21802863-21802934	n-Tm7|chr13_78_tRNAMetInit_CAT+	yes	4.49277	0	5.3895	0	4.44186	0	5.07891	0	2.33558	2.22593	3.07081	2.91659	2.67442	3.37674	1.59434	1.30383	4.94114	4.76039	NO	2.28076	2.9937	NO	3.02558	1.44908	NO	-0.180753	0.645985	Null	2.28944	1.50910637336784e-15	Up
497	chr13:21887668-21887750	n-Tsta1|chr13_79_tRNASup_TTA+	yes	0.0722272	7.89	0.136408	10.89	0.836242	0	0.900668	0	-0.0494615	0.0152058	0.553943	0.322979	-0.0262759	-0.00762164	0	0.180019	0.104317	0.868455	YES	-0.0171279	0.438461	YES	-0.0169488	0.0900096	YES	0.764138	0.0148098	Null	0.348631	0.306371	Null
498	chr13:21939891-21939973	n-Tl24|chr13_991_tRNALeu_TAA-	yes	2.17984	1.01	2.24479	2.33	0.044626	0	0	0	0.407087	0.664023	0	0	0.92742	1.09941	0	0	2.21232	0.022313	NO	0.535555	0	YES	1.01342	0	YES	-2.19	6.66142417476566e-08	Down	0.477861	0.137102	Null
499	chr13:21947189-21947262	n-Ti11|chr13_990_tRNAIle_AAT-	yes	4.44385	0	4.57126	0	5.41088	0	5.98482	0	2.26101	1.98361	3.40837	3.42143	2.52054	2.71463	2.17775	2.6662	4.50756	5.69785	NO	2.12231	3.4149	NO	2.61758	2.42198	NO	1.19029	0.000537191	Up	1.48819	7.66092230047688e-08	Up
500	chr13:21947890-21947963	n-Tt4|chr13_81_tRNAThr_AGT+	yes	3.21365	0	3.65602	0	5.88391	0	6.53631	0	1.06726	1.38779	4.05355	3.96325	1.53266	1.73967	2.63653	2.90607	3.43483	6.21011	NO	1.22752	4.0084	NO	1.63617	2.7713	NO	2.77527	5.05353392648135e-09	Up	1.64574	2.7948940251352e-09	Up
501	chr13:21973902-21973975	n-Ti10|chr13_989_tRNAIle_AAT-	yes	3.67299	0	4.04278	0	2.61798	0	2.94986	0	1.73659	1.70272	2.19071	2.35407	2.26696	2.63827	1.33169	1.63608	3.85789	2.78392	NO	1.71965	2.27239	NO	2.45262	1.48388	NO	-1.07397	0.00131411	Down	1.52147	3.79822640850773e-08	Up
502	chr13:21974754-21974826	n-Tf1|chr13_988_tRNAPhe_GAA-	yes	3.80556	0	3.94788	0	0	0	0	0	1.42439	1.57137	0	0.0591039	2.30309	2.25186	0	0	3.87672	0	NO	1.49788	0.0295519	NO	2.27748	0	NO	-3.87672	7.79043904729853e-12	Down	0.809152	0.00568945	Null
503	chr13:21988807-21988900	n-Ti14|chr13_987_tRNAIle_TAT_I-	yes	0.716251	0	0.800207	0	0.967555	0	1.67363	0	-0.0353394	-0.376529	0.0633792	-0.0781432	-0.0255714	-0.0954144	-0.206047	-0.255114	0.758229	1.32059	YES	-0.205934	-0.00738201	YES	-0.0604929	-0.230581	YES	0.562363	0.0907877	Null	0.36864	0.276549	Null
504	chr13:21998980-21999051	n-Tm2|chr13_82_tRNAMet_CAT+	yes	2.04326	0	0.437336	0	0.425487	0	0.649753	0	0.862395	0.0135887	0.253758	0.0610008	0.61656	0.00124022	-0.110835	-0.144923	1.2403	0.53762	NO	0.437992	0.157379	YES	0.3089	-0.127879	YES	-0.702677	0.0875378	Null	0.156167	0.688775	Null
505	chr13:21999809-21999881	n-Tk23|chr13_83_tRNALys_TTT+	yes	2.16287	0	1.09107	0	3.52565	0	4.1852	0	0.595946	0.21844	2.09987	1.9442	0.770791	0.569657	0.563217	1.09447	1.62697	3.85543	NO	0.407193	2.02203	YES	0.670224	0.828845	YES	2.22846	9.05594530632433e-07	Up	1.45622	1.46815364526248e-07	Up
506	chr13:22003182-22003253	n-Td11|chr13_84_tRNAAsp_GTC+	yes	1.47132	0	1.26159	0	0.632887	0	1.14849	0	0.181071	0.047488	0.470644	0.275357	0.656643	0.480611	0.445576	-0.0419068	1.36645	0.890688	NO	0.11428	0.373	YES	0.568627	0.201834	YES	-0.475763	0.141999	Null	0.625513	0.0409895	Null
507	chr13:22006707-22006812	n-Tl11|chr13_85_tRNALeu_CAA_I+	yes	2.65188	0	1.45413	0	6.14615	0	6.68562	0	0.665755	-0.0305732	4.24105	4.411	1.26246	0.367299	3.26791	3.25679	2.05301	6.41588	NO	0.317591	4.32602	YES	0.814881	3.26235	NO	4.36288	2.56573820686917e-11	Up	1.56097	1.69066196372222e-08	Up
508	chr13:22009031-22009116	n-Tr23|chr13_985_tRNAArg_TCT_I-	yes	2.0636	0	1.25945	0	5.24246	0	5.91789	0	0.908669	0.0585201	3.41385	3.61873	0.807719	0.195939	2.53114	2.79117	1.66152	5.58017	NO	0.483594	3.51629	YES	0.501829	2.66115	NO	3.91865	5.33730136633132e-11	Up	0.873371	0.00259196	Up
509	chr13:22011084-22011165	n-Ts5|chr13_86_tRNASer_AGA+	yes	3.73378	0	4.20533	0	4.63113	0	5.32059	0	1.57539	1.53468	2.734	2.90985	2.15504	2.63454	1.65349	2.13416	3.96955	4.97586	NO	1.55504	2.82192	NO	2.39479	1.89383	NO	1.00631	0.00380317	Up	1.76785	2.16948112858025e-10	Up
510	chr13:22012069-22012140	n-Tq10|chr13_87_tRNAGln_CTG+	yes	3.18414	0	3.26447	0	3.61999	0	4.40747	0	1.26025	0.598308	2.19786	2.35905	1.71252	1.97286	1.50842	1.43007	3.2243	4.01373	NO	0.929277	2.27845	YES	1.84269	1.46925	NO	0.789425	0.0198972	Null	1.72262	5.78894045175335e-10	Up
511	chr13:22016804-22016885	n-Ts25|chr13_984_tRNASer_TGA-	yes	1.87088	0	1.45156	0	1.33026	0	2.04809	0	0.22222	-0.263476	0.46582	0.788721	0.339136	0.14622	0.206559	0.891633	1.66122	1.68918	NO	-0.020628	0.62727	YES	0.242678	0.549096	YES	0.0279604	0.947131	Null	0.34148	0.317725	Null
512	chr13:22019726-22019807	n-Ts6|chr13_88_tRNASer_AGA+	yes	1.33957	0	0.826986	0	2.09437	0	2.6883	0	0.585958	0.090996	0.511838	0.855187	0.882233	-0.0557092	0.171246	0.300491	1.08328	2.39133	NO	0.338477	0.683512	YES	0.413262	0.235869	YES	1.30806	0.000280254	Up	0.522428	0.0979144	Null
513	chr13:22023038-22023109	n-Tm10|chr13_983_tRNAMetInit_CAT-	yes	0.977877	0	0.901305	0	3.18191	0	4.06587	0	0.0876125	0.380497	2.06305	1.82441	0.126596	0.307314	0.833323	1.23663	0.939591	3.62389	NO	0.234055	1.94373	YES	0.216955	1.03498	YES	2.6843	1.19535900037611e-08	Up	0.891653	0.0020307	Up
514	chr13:22025830-22025901	n-Tq8|chr13_982_tRNAGln_CTG-	yes	2.11302	0	1.33711	0	3.95402	0	4.41855	0	0.183757	0.33758	2.48675	2.35301	0.509896	0.319269	1.04201	1.23658	1.72507	4.18629	NO	0.260668	2.41988	YES	0.414583	1.13929	YES	2.46122	5.53151213295259e-08	Up	1.4345	2.32951905141056e-07	Up
515	chr13:22027366-22027437	n-Td13|chr13_981_tRNAAsp_GTC-	yes	2.59521	0	2.17788	0	1.92448	0	2.98831	0	0.303661	0.358389	1.38122	1.5059	0.809589	0.679647	0.508881	0.572692	2.38655	2.4564	NO	0.331025	1.44356	YES	0.744618	0.540787	YES	0.0698501	0.876234	Null	1.31637	2.36650463494281e-06	Up
516	chr13:22028963-22029044	n-Ts10|chr13_980_tRNASer_AGA-	yes	3.68133	0	3.06543	0	5.12198	0	5.72438	0	1.29875	0.746381	3.16268	3.25563	2.02821	1.5315	2.15459	2.56104	3.37338	5.42318	NO	1.02257	3.20916	YES	1.77986	2.35782	NO	2.0498	8.16162957214612e-07	Up	1.60863	6.16722346732347e-09	Up
517	chr13:22032188-22032259	n-Td12|chr13_979_tRNAAsp_GTC-	yes	3.93303	0	4.35951	0	4.33804	0	5.23167	0	1.7795	1.58259	2.93602	2.98878	2.04884	2.19441	1.84428	1.78534	4.14627	4.78486	NO	1.68104	2.9624	NO	2.12162	1.81481	NO	0.638584	0.0692112	Null	1.58817	9.57038409620497e-09	Up
518	chr13:22032783-22032864	n-Ts8|chr13_978_tRNASer_AGA-	yes	3.48562	0	4.03269	0	5.7828	0	6.44499	0	1.88178	1.92789	3.84698	4.00249	2.14291	2.45844	2.95703	2.92418	3.75916	6.11389	NO	1.90484	3.92473	NO	2.30067	2.94061	NO	2.35474	9.50724623626491e-08	Up	1.37996	6.97891014578787e-07	Up
519	chr13:22063657-22063729	n-Tk22|chr13_89_tRNALys_TTT+	yes	1.67485	0	1.65523	0	0.70338	0	0.900668	0	0.514316	0.724141	0.341965	0.223143	0.901809	0.803996	0.0597632	0.0625357	1.66504	0.802024	NO	0.619228	0.282554	YES	0.852902	0.0611494	YES	-0.863015	0.00658267	Null	0.455078	0.160075	Null
520	chr13:22066901-22066972	n-Tm8|chr13_90_tRNAMetInit_CAT+	yes	5.04449	0	5.85395	0	0.0879129	0	0.162953	0	2.8286	3.00031	0	0.37042	3.24574	3.80273	0	0	5.44922	0.125433	NO	2.91446	0.18521	NO	3.52423	0	NO	-5.32379	3.45560746219277e-13	Down	0.794985	0.00672544	Null
521	chr13:22086059-22086140	n-Ts22|chr13_976_tRNASer_GCT-	yes	2.19873	0	1.87072	0	1.28723	0	1.52366	0	0.606736	0.0542653	0.297362	0.647261	1.14191	0.598526	0.42338	-0.0414974	2.03472	1.40545	NO	0.330501	0.472311	YES	0.870217	0.190941	YES	-0.629277	0.0478321	Null	0.821086	0.00494224	Up
522	chr13:22088450-22088521	n-Tq1|chr13_975_tRNAGln_CTG-	yes	1.83394	0	1.93452	0	0.525889	0	0.648915	0	0.563281	0.309575	0.093385	0.223143	0.859513	0.486764	0.117149	0.0625357	1.88423	0.587402	NO	0.436428	0.158264	YES	0.673138	0.0898423	YES	-1.29683	0.000128358	Down	0.305132	0.37659	Null
523	chr13:22107660-22107732	n-Tv3|chr13_974_tRNAVal_AAC-	yes	4.09193	0	4.19601	0	2.73558	0	3.23991	0	2.23801	1.63618	1.34609	1.01775	2.32698	2.59735	0.698767	0.483714	4.14397	2.98775	NO	1.9371	1.18192	NO	2.46217	0.591241	NO	-1.15622	0.000647655	Down	1.11575	8.06133254366679e-05	Up
524	chr13:22113013-22113085	n-Tr1|chr13_973_tRNAArg_ACG-	yes	4.6214	0	4.99727	0	3.39492	0	3.83219	0	2.30712	2.53244	2.12993	2.04837	3.12309	3.2358	1.23476	0.845906	4.80933	3.61356	NO	2.41978	2.08915	NO	3.17944	1.04034	NO	-1.19578	0.000506179	Down	1.80848	9.41768868735971e-11	Up
525	chr13:22114288-22114369	n-Ts12|chr13_972_tRNASer_CGA-	yes	4.63749	0	4.3913	0	4.83102	0	5.2563	0	2.76462	2.28978	3.13323	3.2293	3.38879	2.94607	2.06692	2.21145	4.5144	5.04366	NO	2.5272	3.18127	NO	3.16743	2.13918	NO	0.529265	0.0996004	Null	1.68231	1.30476258022091e-09	Up
526	chr13:22118417-22118489	n-Tv16|chr13_91_tRNAVal_CAC+	yes	3.40686	0	3.66756	0	4.01924	0	4.68017	0	1.85356	1.4438	2.58802	2.66468	1.87476	1.78659	1.29009	1.45855	3.53721	4.3497	NO	1.64868	2.62635	NO	1.83067	1.37432	NO	0.812491	0.0152147	Null	1.43402	2.34273002498785e-07	Up
527	chr13:22121092-22121165	n-Ti7|chr13_92_tRNAIle_AAT+	yes	4.62963	0	4.70041	0	5.57465	0	5.97299	0	2.23981	2.01034	3.6274	3.64653	2.87753	2.84664	2.53504	2.85416	4.66502	5.77382	NO	2.12508	3.63697	NO	2.86208	2.6946	NO	1.10881	0.000871064	Up	1.67937	1.34824487957311e-09	Up
528	chr13:22121969-22122042	n-Tt1|chr13_971_tRNAThr_AGT-	yes	1.05821	0	0.479358	0	3.17485	0	3.80899	0	0.394394	0.23293	1.83333	1.64829	0.430234	0.102041	0.842525	0.980871	0.768783	3.49192	NO	0.313662	1.74081	NO	0.266137	0.911698	YES	2.72314	8.65169712729316e-09	Up	0.781587	0.0078345	Null
529	chr13:22142555-22142636	n-Ts19|chr13_970_tRNASer_GCT-	yes	4.23205	0	4.34041	0	4.71844	0	4.98772	0	1.63197	1.45248	3.35707	3.50103	2.22505	2.42312	2.39992	2.42424	4.28623	4.85308	NO	1.54222	3.42905	NO	2.32409	2.41208	NO	0.566853	0.0715518	Null	1.79884	1.16202894129286e-10	Up
530	chr13:23362290-23362385	n-Ti15|chr13_969_tRNAIle_TAT_I-	yes	0.438155	0	0.407321	0	-0.194049	0	0.0612005	0	-0.288046	0.0924561	-0.220161	-0.38408	-0.00733789	-0.0982176	-0.270845	-0.380648	0.422738	-0.066424	YES	-0.0977948	-0.302121	YES	-0.0527778	-0.325746	YES	-0.489162	0.118336	Null	0.0686428	0.872049	Null
531	chr13:23377270-23377342	n-Tv4|chr13_93_tRNAVal_AAC+	yes	2.71682	0	2.46429	0	0.617362	0	0.410162	0	0.466336	1.20724	0.553943	0	1.16669	1.32322	0.374135	0.235358	2.59056	0.513762	NO	0.83679	0.276972	YES	1.24496	0.304746	NO	-2.0768	1.87935119485154e-07	Down	0.380392	0.257481	Null
532	chr13:23377518-23377590	n-Ta10|chr13_94_tRNAAla_AGC+	yes	2.74893	0	2.494	0	0.823458	0	0.510231	0	0.514337	0.968686	-0.017528	0.11223	1.19953	1.12387	0.30955	0.177739	2.62147	0.666844	NO	0.741511	0.047351	YES	1.1617	0.243644	NO	-1.95462	5.45210582413749e-07	Down	0.223896	0.540615	Null
533	chr13:23390650-23390722	n-Tv6|chr13_95_tRNAVal_AAC+	yes	2.85661	0	1.79377	0	0.783704	0	1.04886	0	1.09471	0.00865135	0.382378	-0.653968	1.16426	0.901987	0.0325644	-0.0980368	2.32519	0.916284	NO	0.551681	-0.135795	YES	1.03312	-0.0327362	YES	-1.40891	0.000256528	Down	0.378384	0.260828	Null
534	chr13:23390930-23391002	n-Ta11|chr13_96_tRNAAla_AGC+	yes	2.27087	0	1.44316	0	0.161835	0	0.0329319	0	0.5015	0.151295	-0.636646	-1.17006	0.658672	0.61672	-0.57716	-0.589771	1.85702	0.0973834	NO	0.326397	-0.903351	YES	0.637696	-0.583465	YES	-1.75963	7.3742680625339e-06	Down	-0.00858751	0.990271	Null
535	chr13:23391991-23392063	n-Tv12|chr13_97_tRNAVal_CAC+	yes	3.22628	0	2.30756	0	-0.175597	0	-0.374592	0	1.03922	0.498808	-0.615207	-0.605052	1.49822	0.78199	-0.706637	-0.698957	2.76692	-0.275094	NO	0.769015	-0.61013	YES	1.1401	-0.702797	NO	-3.04201	1.75253029019566e-09	Down	0.463755	0.150659	Null
536	chr13:23399498-23399570	n-Tv19|chr13_98_tRNAVal_CAC+	yes	2.18977	0	1.26273	0	0.854276	0	0.969337	0	0.441147	0.176493	-0.499447	-0.25264	0.596421	0.278571	-0.0973994	0.0363478	1.72625	0.911807	NO	0.30882	-0.376044	YES	0.437496	-0.0305258	YES	-0.814441	0.0197765	Null	-0.216842	0.557147	Null
537	chr13:23400921-23400994	n-Ti9|chr13_968_tRNAIle_AAT-	yes	3.23059	0.68	2.02488	0.86	0.197961	100	0.418167	80	1.16304	-0.0607133	-0.412033	-0.308353	1.48435	0.346681	-0.475227	-0.382945	2.62774	0.308064	NO	0.551164	-0.360193	YES	0.915515	-0.429086	YES	-2.31967	4.28278033715216e-07	Down	0.433244	0.186128	Null
538	chr13:23409335-23409407	n-Tm12|chr13_99_tRNAMet_CAT+	yes	2.24388	0	1.07123	0	0	0	0.042496	0	0.846164	-0.318091	0	0	0.921456	0.0869676	0.0597632	0.122473	1.65756	0.021248	NO	0.264036	0	YES	0.504212	0.0911181	YES	-1.63631	5.37549688811846e-05	Down	0.149057	0.705128	Null
539	chr13:23488929-23489002	n-Ti3|chr13_100_tRNAIle_AAT+	yes	1.60381	1.38	0.965888	0.5	2.97666	4.4	3.66976	3.03	-0.135864	0.461502	1.60909	1.48084	0.440475	0.456581	0.693587	0.492395	1.28485	3.32321	NO	0.162819	1.54496	YES	0.448528	0.592991	YES	2.03836	1.15734338444098e-06	Up	1.23768	1.00704149170357e-05	Up
540	chr13:23492664-23492736	n-Ta12|chr13_966_tRNAAla_AGC-	yes	2.36141	0	1.96774	0	2.1497	0	2.39005	0	0.450642	0.153731	0.853513	0.745245	0.768491	0.637614	0.135262	0.0641665	2.16457	2.26987	NO	0.302186	0.799379	YES	0.703053	0.0997143	YES	0.1053	0.768717	Null	1.10053	9.97182758157111e-05	Up
541	chr13:23492942-23493014	n-Tv2|chr13_965_tRNAVal_AAC-	yes	1.58804	0	1.11039	0	0.351691	0	0.372493	0	0.425769	-0.0540932	0.244346	0.127601	0.83558	-0.0206577	-0.189548	-0.546382	1.34921	0.362092	NO	0.185838	0.185974	YES	0.407461	-0.367965	YES	-0.987119	0.00274285	Down	0.775562	0.00837888	Null
542	chr13:23503946-23504018	n-Tv10|chr13_964_tRNAVal_CAC-	yes	0.174428	0	0.374862	0	0.257882	0	0.491371	0	-0.399841	-0.0514253	0.324562	0.0228113	0.213649	-0.463482	0.213119	-0.368167	0.274645	0.374627	YES	-0.225633	0.173687	YES	-0.124916	-0.0775242	YES	0.0999821	0.77807	Null	0.351928	0.302157	Null
543	chr13:23504810-23504882	n-Ta7|chr13_963_tRNAAla_AGC-	yes	2.17036	0	1.34471	0	2.52116	0	3.6609	0	0.194416	0.22344	1.45471	1.6023	0.821228	-0.048963	0.593167	0.657769	1.75753	3.09103	NO	0.208928	1.5285	YES	0.386132	0.625468	YES	1.3335	0.00101897	Up	1.08024	0.000135577	Up
544	chr13:23505117-23505189	n-Tv5|chr13_962_tRNAVal_AAC-	yes	1.73042	0	1.22027	0	2.9387	0	3.74556	0	0.409841	0.19397	1.44677	1.60218	0.680762	0.00388623	0.587101	0.916979	1.47535	3.34213	NO	0.301906	1.52447	YES	0.342324	0.75204	YES	1.86679	4.6645289134368e-06	Up	0.81285	0.00545404	Null
545	chr13:23517515-23517603	n-Ty3|chr13_961_tRNATyr_GTA_I-	yes	3.03689	0	3.18985	0	4.79547	0	5.67488	0	1.16478	1.00367	3.29062	3.28959	1.18261	1.48702	2.18961	2.25574	3.11337	5.23517	NO	1.08422	3.2901	YES	1.33482	2.22267	NO	2.1218	5.24693539364933e-07	Up	1.31803	2.299848004739e-06	Up
546	chr13:23518374-23518461	n-Ty4|chr13_101_tRNATyr_GTA_I+	yes	2.81044	0	2.99196	0	5.47833	0	6.15279	0	0.895417	1.23435	3.89458	3.84992	1.68464	1.94059	2.89968	2.88627	2.9012	5.81556	NO	1.06488	3.87225	YES	1.81261	2.89298	NO	2.91436	1.66158489800144e-09	Up	1.727	5.28093736862225e-10	Up
547	chr13:23518964-23519049	n-Ty5|chr13_960_tRNATyr_GTA_I-	yes	2.12361	0	1.73676	0	1.87587	0	2.54385	0	0.395054	0.413578	0.686628	1.20912	0.92709	0.396733	0.468783	1.00042	1.93019	2.20986	NO	0.404316	0.947876	YES	0.661911	0.734602	YES	0.279671	0.422379	Null	0.470869	0.143551	Null
548	chr13:23520607-23520695	n-Ty6|chr13_959_tRNATyr_GTA_I-	yes	0.179508	0	0.402197	0	1.76704	0	2.40267	0	0.310588	0.310335	0.0671629	0.814557	-0.042479	0.0164854	-0.177654	-0.318896	0.290853	2.08485	NO	0.310461	0.44086	YES	-0.0129968	-0.248275	YES	1.794	3.75824068420269e-06	Up	0.365677	0.280168	Null
549	chr13:23523281-23523353	n-Ta13|chr13_102_tRNAAla_AGC+	yes	5.55155	0	5.97566	0	4.44414	0	4.87357	0	2.79351	2.89172	2.52006	2.79023	3.46822	3.84056	1.83827	1.74637	5.7636	4.65886	NO	2.84261	2.65515	NO	3.65439	1.79232	NO	-1.10475	0.00116478	Down	1.67461	1.5047778984562e-09	Up
550	chr13:23524859-23524946	n-Ty7|chr13_958_tRNATyr_GTA_I-	yes	4.07035	0	4.73867	0	1.67121	0	2.22381	0	2.14522	2.54561	0.802217	0.975134	2.76304	3.56302	0.0221657	0.0858839	4.40451	1.94751	NO	2.34541	0.888676	NO	3.16303	0.0540248	NO	-2.457	5.01713804596694e-08	Down	1.65227	2.45584348329672e-09	Up
551	chr13:23528209-23528281	n-Tk11|chr13_103_tRNALys_CTT+	yes	4.01274	0	4.39468	0	4.24363	0	4.8824	0	1.64327	1.74904	3.41558	3.07993	2.31306	2.44351	1.3447	1.22161	4.20371	4.56302	NO	1.69615	3.24775	NO	2.37828	1.28316	NO	0.359307	0.290776	Null	2.64673	1.67485109033566e-20	Up
552	chr13:23528863-23528934	n-Tp3|chr13_957_tRNAPro_AGG-	yes	3.96189	0	3.92975	0	5.57638	0	6.31455	0	1.65546	1.38179	3.60097	3.81651	2.46484	2.10217	2.58274	2.57569	3.94582	5.94546	NO	1.51863	3.70874	NO	2.28351	2.57922	NO	1.99964	8.28824628495461e-07	Up	1.89441	1.42079470130354e-11	Up
553	chr13:23529978-23530051	n-Ti8|chr13_956_tRNAIle_AAT-	yes	5.44669	0	5.47617	0	5.89894	0	6.19211	0	3.03497	2.52157	4.1677	4.07612	3.58509	3.59901	2.86485	3.07086	5.46143	6.04553	NO	2.77827	4.12191	NO	3.59205	2.96786	NO	0.5841	0.0636955	Null	1.96783	2.83971677818441e-12	Up
554	chr13:23530566-23530637	n-Ta29|chr13_955_tRNAAla_CGC-	yes	3.63639	0	4.45721	0	3.63336	0	4.3359	0	1.62504	2.09953	2.45746	2.20128	2.28827	2.49848	0.849945	0.814795	4.0468	3.98463	NO	1.86229	2.32937	NO	2.39338	0.83237	NO	-0.0621769	0.887052	Null	2.02809	9.01463082956122e-13	Up
555	chr13:23538011-23538083	n-Tv17|chr13_954_tRNAVal_CAC-	yes	4.31042	0	4.24321	0	2.47386	0	2.79057	0	2.38905	2.01766	1.72554	1.87829	2.86814	2.6071	0.781577	0.529068	4.27681	2.63222	NO	2.20336	1.80191	NO	2.73762	0.655322	NO	-1.6446	6.5544325281916e-06	Down	1.68085	1.31952430779601e-09	Up
556	chr13:23538661-23538733	n-Tr5|chr13_953_tRNAArg_ACG-	yes	4.54181	0	3.97417	0	1.48063	0	1.73628	0	2.24129	1.63913	1.60386	1.32508	2.85852	2.28373	0.508881	0.288652	4.25799	1.60845	NO	1.94021	1.46447	NO	2.57112	0.398766	NO	-2.64954	6.83194273660001e-09	Down	1.69661	9.81795005953625e-10	Up
557	chr13:23542491-23542564	n-Tt6|chr13_104_tRNAThr_AGT+	yes	4.75641	0	4.88802	0	5.5105	0	6.05947	0	2.58785	2.43238	3.62059	3.47838	3.03092	3.03105	2.15214	2.43121	4.82222	5.78499	NO	2.51011	3.54948	NO	3.03098	2.29168	NO	0.96277	0.00371153	Up	1.77868	1.71548805116372e-10	Up
558	chr13:23545301-23545383	n-Tl22|chr13_952_tRNALeu_CAG-	yes	4.84959	0	5.00755	0	1.62597	0	1.42902	0	2.57894	2.33358	0.724054	1.35912	3.17509	3.18761	0.613678	0.656034	4.92857	1.52749	NO	2.45626	1.04159	NO	3.18135	0.634856	NO	-3.40108	6.18363185653383e-11	Down	1.13182	6.24549220989153e-05	Up
559	chr13:23555404-23555475	n-Te15|chr13_105_tRNAGlu_TTC+	yes	4.16829	0	3.78673	0	5.93753	0	6.63885	0	1.65659	1.33536	4.22307	4.23462	2.40608	2.17434	3.13098	3.25075	3.97751	6.28819	NO	1.49598	4.22885	NO	2.29021	3.19087	NO	2.31068	1.04696821884649e-07	Up	1.83221	5.72016509906208e-11	Up
560	chr13:23558945-23559034	n-Ty8|chr13_106_tRNATyr_GTA_I+	yes	4.11518	0	4.21743	0	5.38529	0	5.86627	0	2.03739	1.63121	3.62883	3.82674	2.1873	2.3388	2.42295	2.85307	4.1663	5.62578	NO	1.8343	3.72778	NO	2.26305	2.63801	NO	1.45948	4.30946862609872e-05	Up	1.51853	4.03740836245987e-08	Up
561	chr13:23589975-23590046	n-Tw3|chr13_107_tRNATrp_CCA+	yes	3.07831	0	1.98144	0	5.05642	0	5.60726	0	0.889322	0.183531	3.42312	3.48804	1.47088	0.9321	2.10037	2.30216	2.52987	5.33184	NO	0.536426	3.45558	YES	1.20149	2.20126	NO	2.80197	2.14060465844512e-08	Up	1.91938	7.60244681178187e-12	Up
562	chr13:23591949-23592020	n-Tm5|chr13_108_tRNAMetInit_CAT+	yes	2.15727	0	1.59957	0	5.57886	0	6.25618	0	0.65752	0.21844	3.88434	3.9899	0.864465	0.587991	2.52462	2.67865	1.87842	5.91752	NO	0.43798	3.93712	YES	0.726228	2.60164	NO	4.0391	2.0884166029509e-11	Up	1.62373	4.47110228144976e-09	Up
563	chr13:23592391-23592463	n-Tr4|chr13_951_tRNAArg_ACG-	yes	1.11636	0	1.15027	0	5.01024	0	5.60436	0	-0.0996385	0.353661	3.4333	3.29756	0.584331	0.504155	1.67697	1.86133	1.13331	5.3073	NO	0.127011	3.36543	YES	0.544243	1.76915	NO	4.17399	4.50679996939949e-12	Up	2.01351	1.04201446146298e-12	Up
564	chr13:23592826-23592907	n-Ts7|chr13_950_tRNASer_AGA-	yes	2.67915	0	2.59522	0	5.74971	0	6.41827	0	0.872841	0.833501	3.82755	4.10147	1.07409	1.12768	2.96552	3.30947	2.63718	6.08399	NO	0.853171	3.96451	YES	1.10089	3.13749	NO	3.44681	1.25135334905853e-10	Up	1.07473	0.000147463	Up
565	chr13:23595849-23595921	n-Tr17|chr13_949_tRNAArg_TCG-	yes	4.07237	0	4.04418	0	4.12427	0	4.53821	0	1.92262	1.71667	3.04806	2.47235	2.24487	2.31058	1.09662	1.41	4.05827	4.33124	NO	1.81965	2.7602	NO	2.27773	1.25331	NO	0.272963	0.408613	Null	1.96498	2.8958032873463e-12	Up
566	chr13:23598388-23598459	n-Tw4|chr13_109_tRNATrp_CCA+	yes	4.09402	0	3.78983	0	5.33298	0	5.67087	0	1.85839	1.22386	3.43367	3.59642	2.21625	2.17189	2.44965	2.59347	3.94192	5.50192	NO	1.54112	3.51504	NO	2.19407	2.52156	NO	1.56	1.65782757961072e-05	Up	1.64643	2.76714958103052e-09	Up
567	chr13:23609072-23609142	n-Tg27|chr13_110_tRNAGly_GCC+	yes	4.59241	0	4.58111	0	3.81632	0	4.45127	0	2.46887	2.06314	2.64203	2.61071	2.64152	2.67186	1.37808	1.18269	4.58676	4.1338	NO	2.26601	2.62637	NO	2.65669	1.28038	NO	-0.452966	0.167887	Null	1.73667	4.17283894913057e-10	Up
568	chr13:23609561-23609632	n-Tm6|chr13_111_tRNAMetInit_CAT+	yes	4.51023	0	5.12253	0	4.57062	0	5.07843	0	1.87525	2.20745	3.01147	2.86261	2.52612	2.83304	1.77563	1.54579	4.81638	4.82453	NO	2.04135	2.93704	NO	2.67958	1.66071	NO	0.00814497	0.984961	Null	1.91456	8.3142498177735e-12	Up
569	chr13:23610015-23610096	n-Ts24|chr13_112_tRNASer_TGA+	yes	3.94434	0	4.1212	0	3.54726	0	4.10855	0	1.68648	1.37649	2.16391	1.93609	1.82083	2.17265	1.01701	1.05227	4.03277	3.8279	NO	1.53149	2.05	NO	1.99674	1.03464	NO	-0.204866	0.556013	Null	1.48061	8.92020648765361e-08	Up
570	chr13:23610919-23610990	n-Tq14|chr13_113_tRNAGln_TTG+	yes	4.91684	0	5.03098	0	5.34828	0	5.90916	0	2.59943	2.65906	3.46088	3.5497	3.00901	3.28786	2.44865	2.60022	4.97391	5.62872	NO	2.62924	3.50529	NO	3.14843	2.52444	NO	0.654814	0.0441177	Null	1.50004	5.95125774206645e-08	Up
571	chr13:23611482-23611553	n-Tq15|chr13_114_tRNAGln_TTG+	yes	4.23791	0	4.44755	0	5.51658	0	6.11077	0	2.07254	2.32063	3.84773	3.68064	2.30936	2.65322	2.40716	2.45465	4.34273	5.81368	NO	2.19659	3.76418	NO	2.48129	2.43091	NO	1.47095	5.04578224862492e-05	Up	1.61798	5.06381434010993e-09	Up
572	chr13:23613739-23613820	n-Ts18|chr13_115_tRNASer_GCT+	yes	5.03767	0	5.46417	0	4.76522	0	5.24227	0	2.74413	2.86167	3.0374	3.31425	3.25786	3.62723	1.80288	2.09679	5.25092	5.00375	NO	2.8029	3.17582	NO	3.44255	1.94984	NO	-0.247174	0.469921	Null	1.86563	2.66557250758769e-11	Up
573	chr13:23618325-23618397	n-Tr15|chr13_948_tRNAArg_TCG-	yes	4.31712	0	4.47761	0	3.01384	0	3.72355	0	2.49853	1.92391	1.68838	1.7671	2.87964	2.84094	0.585186	0.528593	4.39736	3.36869	NO	2.21122	1.72774	NO	2.86029	0.556889	NO	-1.02867	0.00269665	Down	1.81993	7.45759258437055e-11	Up
574	chr13:23622217-23622288	n-Tm9|chr13_947_tRNAMetInit_CAT-	yes	4.75235	0	5.03736	0	5.21351	0	5.92919	0	2.62603	2.34124	3.75636	3.59329	2.99256	3.01508	2.36011	2.07844	4.89486	5.57135	NO	2.48363	3.67483	NO	3.00382	2.21928	NO	0.676497	0.0442229	Null	1.97573	2.6220416219287e-12	Up
581	chr14:51683558-51683639	n-Tl8|chr14_188_tRNALeu_AAG+	yes	5.56732	0	5.72628	0	6.1215	0	6.57529	0	3.21109	2.76211	4.04289	4.11653	3.57641	3.52829	2.92515	3.23508	5.6468	6.3484	NO	2.9866	4.07971	NO	3.55235	3.08012	NO	0.701594	0.0292349	Null	1.56535	1.5478083542778e-08	Up
582	chr14:51684489-51684560	n-Tp4|chr14_705_tRNAPro_AGG-	yes	4.0601	0	4.63904	0	5.73922	0	6.33792	0	1.60673	1.79257	3.8238	3.87577	2.12237	2.67985	2.7312	2.71742	4.34957	6.03857	NO	1.69965	3.84979	NO	2.40111	2.72431	NO	1.689	1.29543641216268e-05	Up	1.82693	6.38175923963782e-11	Up
583	chr14:51684843-51684915	n-Tt17|chr14_704_tRNAThr_TGT-	yes	3.98831	0	4.6452	0	5.44877	0	6.19596	0	1.78463	1.92413	3.61165	3.6583	2.28095	2.64335	2.53999	2.63905	4.31675	5.82236	NO	1.85438	3.63498	NO	2.46215	2.58952	NO	1.50561	9.05297578255245e-05	Up	1.65323	2.42913711002281e-09	Up
584	chr14:51702505-51702586	n-Tl28|chr14_703_tRNALeu_TAG-	yes	3.81692	0	3.28898	0	4.85794	0	5.55562	0	1.76275	0.784507	3.0208	3.25824	2.10789	1.62835	2.20945	2.40522	3.55295	5.20678	NO	1.27363	3.13952	NO	1.86812	2.30733	NO	1.65383	1.94950380424546e-05	Up	1.42668	2.7255027106719e-07	Up
585	chr14:51708325-51708397	n-Tt15|chr14_190_tRNAThr_TGT+	yes	4.32601	0	4.76211	0	4.81305	0	5.56372	0	2.075	2.1074	2.92635	2.91869	2.62701	2.99374	1.83782	1.93821	4.54406	5.18839	NO	2.0912	2.92252	NO	2.81038	1.88801	NO	0.644327	0.0601961	Null	1.75368	2.92887183546114e-10	Up
586	chr14:51709164-51709253	n-Ty10|chr14_191_tRNATyr_GTA_I+	yes	5.22572	0	5.28035	0	5.55722	0	6.09	0	2.87678	2.42915	3.64691	3.80089	3.15873	3.29574	2.62131	2.8923	5.25304	5.82361	NO	2.65296	3.7239	NO	3.22723	2.75681	NO	0.570576	0.0777053	Null	1.54136	2.50985642745688e-08	Up
587	chr14:51710322-51710393	n-Tp15|chr14_192_tRNAPro_TGG+	yes	4.17276	0	4.01934	0	5.94842	0	6.63718	0	2.12271	1.53672	4.0988	4.19796	2.36231	2.40412	3.03471	3.22216	4.09605	6.2928	NO	1.82971	4.14838	NO	2.38322	3.12843	NO	2.19676	1.75670839586201e-07	Up	1.57345	1.32533449221376e-08	Up
588	chr14:55136533-55136605	n-Tr6|chr14_209_tRNAArg_ACG+	yes	5.15083	0	5.46372	0	6.35641	0	6.81579	0	2.92711	2.8728	4.39707	4.43549	3.4697	3.62876	3.208	3.49798	5.30728	6.5861	NO	2.89995	4.41628	NO	3.54923	3.35299	NO	1.27883	0.000235601	Up	1.71257	7.05764426603591e-10	Up
590	chr14:59436990-59437063	n-Tt2|chr14_628_tRNAThr_AGT-	yes	0.291271	0	0.00967221	0	0.0138375	0	-0.29417	0	-0.0422781	-0.193997	-0.116839	-0.0168117	0.320656	0.143524	0.178052	0.0115107	0.150471	-0.140166	YES	-0.118137	-0.0668251	YES	0.23209	0.0947814	YES	-0.290638	0.375865	Null	0.188621	0.616261	Null
594	chr14:76552581-76552652	n-Te16|chr14_347_tRNAGlu_TTC+	yes	4.36099	0	4.5607	0	5.78388	0	6.45744	0	2.09329	1.81917	3.9785	4.04254	2.42323	2.57576	2.9219	3.00733	4.46084	6.12066	NO	1.95623	4.01052	NO	2.4995	2.96462	NO	1.65982	1.17782627799547e-05	Up	1.58917	9.40520265470984e-09	Up
595	chr14:79881475-79881546	n-Te14|chr14_359_tRNAGlu_TTC+	yes	3.82501	0	4.075	0	5.96975	0	6.4666	0	1.49415	1.53652	3.82268	3.84936	1.85554	2.06901	2.82086	3.07885	3.95001	6.21817	NO	1.51533	3.83602	NO	1.96228	2.94986	NO	2.26817	7.39729880988729e-08	Up	1.33311	1.71956705087127e-06	Up
596	chr14:118488747-118488819	n-Tf5|chr14_457_tRNAPhe_GAA-	yes	3.73552	0	3.22473	0	0.0491296	0	-0.32304	0	1.47277	0.78997	-0.512515	-0.296742	2.16641	1.51727	-0.148323	-0.426509	3.48013	-0.136955	NO	1.13137	-0.404628	YES	1.84184	-0.287416	NO	-3.61708	5.33730136633132e-11	Down	0.593253	0.0551749	Null
597	chr15:16205705-16205778	n-Tn2|chr15_1013_tRNAAsn_GTT-	yes	-0.378986	0	0.432137	0	-0.14138	0	-0.364937	0	-0.456971	-0.00540884	-0.45266	-0.104203	-0.14387	0.085874	-0.344339	0.183311	0.0265754	-0.253158	YES	-0.23119	-0.278432	YES	-0.0289979	-0.0805143	YES	-0.279734	0.428741	Null	0.00427468	0.992093	Null
602	chr15:57807538-57807610	n-Tm16|chr15_913_tRNAMet_CAT-	yes	4.57156	0	5.04093	0	5.19045	0	5.38012	0	2.38326	2.39913	3.69773	3.72192	2.72383	3.14887	2.40445	2.79321	4.80624	5.28528	NO	2.3912	3.70982	NO	2.93635	2.59883	NO	0.479038	0.136153	Null	1.65615	2.29531512310814e-09	Up
605	chr15:69227053-69227124	n-Tm3|chr15_876_tRNAMet_CAT-	yes	-0.11984	0	0.195026	0	-0.608123	0	-0.320509	0	-0.158391	0.369218	-0.833034	-0.893948	-0.228505	0.103966	-0.668827	-0.75614	0.0375929	-0.464316	YES	0.105414	-0.863491	YES	-0.06227	-0.712483	YES	-0.501909	0.114542	Null	-0.318691	0.353783	Null
607	chr15:88471962-88472034	n-Tm4|chr15_355_tRNAMet_CAT+	yes	0.163353	0	0.0492974	0	0.121437	0	-0.1649	0	0.317922	0.111026	0.335111	-0.126449	0.140608	0.0590055	-0.02111	-0.313899	0.106325	-0.0217313	YES	0.214474	0.104331	YES	0.0998069	-0.167505	YES	-0.128057	0.713464	Null	0.157169	0.686375	Null
611	chr16:3012009-3012080	n-Tl2|chr16_829_tRNALeu_AAG-	yes	-0.0524641	100	0.0643218	100	0.481837	100	0.590492	100	0.00703191	-0.0793313	0.420016	0.299741	0.0354893	-0.0791942	0.636786	0.27497	0.00592882	0.536164	YES	-0.0361497	0.359879	YES	-0.0218525	0.455878	YES	0.530235	0.0891293	Null	-0.0817024	0.842016	Null
612	chr16:3449838-3449909	n-Tl1|chr16_4_tRNALeu_AAG+	yes	0.04361	50.74	-0.134878	71.69	0.304583	51.47	0.776831	41.3	0.22815	0.212201	0.531028	0.349858	0.154624	0.0819307	0.467211	0.211783	-0.0456339	0.540707	YES	0.220175	0.440443	YES	0.118277	0.339497	YES	0.586341	0.0685432	Null	-0.000951595	0.998021	Null
615	chr16:13437416-13437487	n-Tt14|chr16_50_tRNAThr_CGT+	yes	4.26402	0	4.36787	0	5.34415	0	5.58431	0	1.72469	1.61404	3.24495	3.34844	2.39023	2.43713	2.24417	2.55961	4.31595	5.46423	NO	1.66936	3.29669	NO	2.41368	2.40189	NO	1.14828	0.000531258	Up	1.63912	3.23500576271334e-09	Up
617	chr16:16854357-16854429	n-Tk3|chr16_76_tRNALys_CTT+	yes	-0.0694829	0	-0.172136	0	-0.0601105	0	0.397089	0	-0.403537	-0.234723	0.14547	0.440831	-0.0901942	-0.243724	-0.00651927	0.237851	-0.12081	0.168489	YES	-0.31913	0.29315	YES	-0.166959	0.115666	YES	0.289299	0.381041	Null	0.329655	0.335573	Null
625	chr16:47250659-47250731	n-Tk2|chr16_267_tRNALys_CTT+	yes	-0.288931	0	0.370594	0	0.149693	0	0.229362	0	-0.341777	0.138263	0.452338	0.318042	-0.650505	0.0403125	0.220056	-0.236929	0.0408316	0.189528	YES	-0.101757	0.38519	YES	-0.305096	-0.0084364	YES	0.148696	0.680593	Null	0.190287	0.614864	Null
627	chr16:75434424-75434497	n-Ti1|chr16_315_tRNAIle_AAT+	yes	0.178288	0	0.0319085	0	-0.0149628	0	-0.0994381	0	-0.0247895	-0.186354	-0.101219	-0.0727638	0.228295	-0.235779	-0.270845	-0.0535096	0.105098	-0.0572005	YES	-0.105572	-0.0869913	YES	-0.00374235	-0.162177	YES	-0.162299	0.634114	Null	0.177016	0.640902	Null
631	chr17:23670929-23671001	n-Tk13|chr17_82_tRNALys_CTT+	yes	3.08115	56.74	2.65104	50.84	5.03528	50.49	5.67723	52.41	1.2499	0.907779	3.0796	3.27007	1.24259	1.18056	2.20396	2.20486	2.86609	5.35626	NO	1.07884	3.17484	YES	1.21158	2.20441	NO	2.49016	2.88745864345919e-08	Up	1.10316	9.68232010965768e-05	Up
632	chr17:23672299-23672371	n-Tk12|chr17_1000_tRNALys_CTT-	yes	2.60683	60.23	2.14608	49.48	4.71599	55.56	5.41209	55.4	0.529895	0.555702	2.86483	2.99349	0.903478	0.659947	1.93021	1.92736	2.37645	5.06404	NO	0.542798	2.92916	YES	0.781712	1.92878	NO	2.68759	9.89619032032739e-09	Up	1.2393	9.81015040039771e-06	Up
633	chr17:23675733-23675804	n-Tp11|chr17_998_tRNAPro_TGG-	yes	0.533634	0	-0.0664219	0	2.37437	0	2.60209	0	0.0654196	0.146982	1.40844	1.55914	0.092361	0.0017102	1.37435	1.52148	0.233606	2.48823	NO	0.106201	1.48379	YES	0.0470356	1.44791	YES	2.25462	9.93269096826655e-08	Up	-0.0232892	0.968255	Null
634	chr17:23677882-23677953	n-Tp10|chr17_83_tRNAPro_CGG+	yes	3.35179	0	1.94119	0	4.98022	0	5.66447	0	1.1756	0.409621	3.27447	3.27989	1.82409	0.574002	1.91976	2.33853	2.64649	5.32235	NO	0.792608	3.27718	YES	1.19904	2.12914	NO	2.67586	1.80109021616192e-07	Up	1.55447	1.92041581559121e-08	Up
635	chr17:23683443-23683514	n-Tp16|chr17_996_tRNAPro_TGG-	yes	3.69164	0	4.46655	0	5.73144	0	6.10816	0	1.60422	1.93134	3.61341	3.63289	1.83668	2.66108	2.52657	2.61478	4.07909	5.9198	NO	1.76778	3.62315	NO	2.24888	2.57067	NO	1.84071	4.2957465368453e-06	Up	1.53357	2.90462102721177e-08	Up
636	chr17:23684327-23684399	n-Tk14|chr17_84_tRNALys_CTT+	yes	3.82611	0	4.01101	0	6.27366	0	6.71112	0	1.65975	1.63316	4.31143	4.29054	2.05258	2.22771	2.96609	3.28962	3.91856	6.49239	NO	1.64646	4.30099	NO	2.14014	3.12786	NO	2.57382	7.71018377323531e-09	Up	1.66682	1.7821074099908e-09	Up
637	chr17:23685735-23685807	n-Tr11|chr17_995_tRNAArg_CCT-	yes	4.61544	0	4.4203	0	5.82091	0	6.20585	0	2.51082	1.57398	4.05555	4.05757	2.81202	2.42749	2.96238	3.17946	4.51787	6.01338	NO	2.0424	4.05656	NO	2.61975	3.07092	NO	1.49551	2.81005888580706e-05	Up	1.56299	1.62242338630111e-08	Up
638	chr17:23687230-23687302	n-Tr8|chr17_994_tRNAArg_CCG-	yes	3.57417	0	4.17992	0	6.57202	0	7.08821	0	1.31114	1.92691	4.72598	4.62818	1.80322	2.38436	3.42079	3.6104	3.87704	6.83011	NO	1.61902	4.67708	NO	2.09379	3.5156	NO	2.95307	1.75253029019566e-09	Up	1.63625	3.42086645497569e-09	Up
641	chr17:26012033-26012103	n-Tg7|chr17_113_tRNAGly_CCC+	yes	4.45238	0	4.60608	0	5.29847	0	5.66288	0	2.36587	1.87887	3.28648	3.40732	2.54932	2.74654	2.21976	2.54303	4.52923	5.48067	NO	2.12237	3.3469	NO	2.64793	2.38139	NO	0.951443	0.00341523	Up	1.49106	7.22513905848907e-08	Up
644	chr17:56231424-56231495	n-Te4|chr17_720_tRNAGlu_CTC-	yes	-0.217817	16.14	0.572842	8.06	-0.501786	16.77	-0.558895	24.25	-0.141899	0.191013	-0.833594	-0.2784	-0.0201723	0.212118	-0.596536	-0.641716	0.177513	-0.530341	YES	0.0245571	-0.555997	YES	0.0959729	-0.619126	YES	-0.707854	0.0365211	Null	0.134545	0.734303	Null
646	chr17:59208131-59208203	n-Tv11|chr17_392_tRNAVal_CAC+	yes	-0.0535584	0	0.160382	0	0.466556	0	1.10663	0	-0.746903	0.58437	0.57951	0.428901	-0.0399015	0.372226	0.247353	0.37803	0.0534119	0.786592	YES	-0.0812665	0.504205	YES	0.166162	0.312691	YES	0.73318	0.0268029	Null	0.438943	0.179465	Null
648	chr17:71948611-71948682	n-Tc52|chr17_458_tRNACys_GCA+	yes	3.11137	0	2.7909	0	2.91824	0	3.41449	0	1.3104	0.662991	1.30156	1.50984	1.45092	1.36228	0.961635	0.367405	2.95113	3.16637	NO	0.986695	1.4057	YES	1.4066	0.66452	NO	0.215232	0.532214	Null	1.16109	3.86666116605496e-05	Up
649	chr17:84261284-84261376	n-Ti17|chr17_516_tRNAIle_TAT_I+	yes	4.34154	0	3.85543	0	5.47297	0	5.73099	0	2.36269	1.39262	3.46281	3.62634	2.64863	1.9756	2.37624	2.64391	4.09849	5.60198	NO	1.87765	3.54458	NO	2.31212	2.51007	NO	1.50349	3.23884260894202e-05	Up	1.46896	1.13449207983157e-07	Up
652	chr18:46446083-46446154	n-Tt10|chr18_633_tRNAThr_CGT-	yes	0.0985634	0	-0.0716853	0	-0.236961	0	0.028017	0	-0.0994285	0.00865135	0.284569	-0.063485	-0.218147	0.249593	0.129815	0.385154	0.0134391	-0.104472	YES	-0.0453886	0.110542	YES	0.0157227	0.257485	YES	-0.117911	0.737735	Null	-0.085831	0.834306	Null
655	chr19:3066556-3066627	n-Tl3|chr19_2_tRNALeu_AAG+	yes	-0.00120522	100	0.0112964	100	0.281577	100	0.524892	100	0.0845428	0.0421057	0.308592	0.410364	0.149381	-0.0362933	0.644673	0.281273	0.0050456	0.403235	YES	0.0633243	0.359478	YES	0.056544	0.462973	YES	0.398189	0.206462	Null	-0.110275	0.786891	Null
656	chr19:3576263-3576335	n-Ta9|chr19_8_tRNAAla_AGC+	yes	4.30083	0	4.32702	0	6.36926	0	6.82528	0	2.33152	1.74978	4.5364	4.58655	2.97029	2.87784	3.328	3.56649	4.31392	6.59727	NO	2.04065	4.56147	NO	2.92406	3.44725	NO	2.28334	5.48715788649406e-08	Up	1.99764	1.57905125897115e-12	Up
659	chr19:5038304-5038385	n-Ts20|chr19_711_tRNASer_GCT-	yes	4.18939	0	3.82947	0	6.01565	0	6.28204	0	1.78099	1.06446	4.02475	4.16589	2.5764	2.19634	2.98333	3.42029	4.00943	6.14885	NO	1.42273	4.09532	NO	2.38637	3.20181	NO	2.13942	1.46428952864239e-07	Up	1.85716	3.17958645555336e-11	Up
663	chr19:12076726-12076798	n-Tf6|chr19_106_tRNAPhe_GAA+	yes	4.74508	0	4.43222	0	2.01358	0	2.66575	0	2.41386	1.87705	0.576757	0.974658	3.03504	3.18392	0.103063	0.652224	4.58865	2.33966	NO	2.14545	0.775707	NO	3.10948	0.377644	NO	-2.24899	1.28949748218783e-07	Down	1.36209	9.88493712476931e-07	Up
664	chr19:12080529-12080601	n-Tk29|chr19_107_tRNALys_TTT+	yes	4.10741	0	4.82708	0	5.87457	0	6.34435	0	1.9247	2.35303	4.02642	3.91366	2.26053	2.69421	2.6538	2.71435	4.46725	6.10946	NO	2.13887	3.97004	NO	2.47737	2.68407	NO	1.64221	2.05106063783486e-05	Up	1.62447	4.42052231589197e-09	Up
665	chr19:12083035-12083107	n-Tf2|chr19_108_tRNAPhe_GAA+	yes	1.57958	0	0.84504	0	4.87773	0	5.57331	0	0.420443	0.41377	3.33934	3.28056	0.796868	0.102041	2.29487	2.36124	1.21231	5.22552	NO	0.417107	3.30995	NO	0.449455	2.32805	NO	4.01321	3.14041340392405e-11	Up	1.01424	0.000366522	Up
666	chr19:12084186-12084258	n-Tk30|chr19_639_tRNALys_TTT-	yes	4.3879	0	4.78191	0	6.53017	0	7.11608	0	2.30369	2.63261	4.53566	4.44368	3.20071	3.53077	3.58153	3.76619	4.58491	6.82313	NO	2.46815	4.48967	NO	3.36574	3.67386	NO	2.23822	1.31996161415935e-07	Up	1.71339	6.97954428715103e-10	Up
667	chr19:12085576-12085658	n-Tl26|chr19_638_tRNALeu_TAA-	yes	4.30652	0	4.34006	0	6.32655	0	6.81242	0	2.0887	1.78402	4.20424	4.25065	2.65187	2.80511	3.19295	3.32335	4.32329	6.56948	NO	1.93636	4.22744	NO	2.72849	3.25815	NO	2.2462	7.39729880988729e-08	Up	1.76142	2.5051697897467e-10	Up
668	chr19:12086078-12086163	n-Tr21|chr19_637_tRNAArg_TCT_I-	yes	4.38153	0	4.44082	0	6.00815	0	6.44232	0	2.21563	1.77623	3.98408	4.09187	2.47586	2.53757	2.85159	2.97962	4.41118	6.22524	NO	1.99593	4.03798	NO	2.50671	2.9156	NO	1.81406	1.85341265490501e-06	Up	1.63316	3.63660553442843e-09	Up
669	chr19:12086421-12086493	n-Tv21|chr19_109_tRNAVal_TAC+	yes	4.86183	0	4.94827	0	6.33692	0	6.70191	0	2.63773	2.26141	4.42457	4.54364	2.84914	2.8361	3.28912	3.43497	4.90505	6.51941	NO	2.44957	4.4841	NO	2.84262	3.36205	NO	1.61436	9.02798793878e-06	Up	1.51511	4.33728144835117e-08	Up
670	chr19:12086756-12086828	n-Tv22|chr19_110_tRNAVal_TAC+	yes	3.4111	0	3.3707	0	5.37369	0	5.99859	0	1.21216	1.03491	3.48015	3.61236	1.49172	1.47208	2.38001	2.71839	3.3909	5.68614	NO	1.12354	3.54626	NO	1.4819	2.5492	NO	2.29523	7.29758665915239e-08	Up	1.35542	1.11242520207716e-06	Up
676	chrX:13436292-13436363	n-Tq11|chrX_936_tRNAGln_TTG-	yes	-0.239052	0	0.228165	0	0.0367416	0	0.347081	0	-0.354925	0.0542703	0.154696	-0.0829148	-0.089745	0.00711475	-0.115704	-0.132779	-0.00544337	0.191912	YES	-0.150327	0.0358905	YES	-0.0413151	-0.124242	YES	0.197355	0.571527	Null	0.269144	0.442903	Null
677	chrX:14279742-14279813	n-Tp13|chrX_931_tRNAPro_TGG-	yes	-0.189566	0	-0.181254	7.69	-0.0276894	0	-0.0611889	15.78	-0.227327	-0.159841	0.684866	-0.0988489	-0.0897664	-0.0855817	-0.00136456	0.293929	-0.18541	-0.0444392	YES	-0.193584	0.293008	YES	-0.087674	0.146282	YES	0.140971	0.678933	Null	0.252636	0.477255	Null
680	chrX:53840716-53840788	n-Ta2|chrX_159_tRNAAla_AGC+	yes	-0.330512	0	0.0870806	0	-0.187183	0	-0.589165	0	-0.509225	0.143889	-0.449303	-0.342652	-0.418649	0.17037	-0.487577	-0.424421	-0.121716	-0.388174	YES	-0.182668	-0.395978	YES	-0.12414	-0.455999	YES	-0.266458	0.428741	Null	0.11855	0.770366	Null
682	chrX:108490826-108490898	n-Tr13|chrX_321_tRNAArg_CCT+	yes	0.394104	0	0.415485	0	0.73328	0	0.568207	0	-0.0920366	0.210227	-0.0581856	0.374616	-0.303965	0.102472	-0.0260154	0.675376	0.404795	0.650744	YES	0.0590953	0.158215	YES	-0.100747	0.32468	YES	0.245949	0.448182	Null	-0.326307	0.341069	Null
684	chrX:132730271-132730343	n-Tk19|chrX_643_tRNALys_CTT-	yes	0.575339	0	0.00812928	0	1.05046	0	0.848455	0	0.33005	0.065584	0.516397	0.646278	0.560313	-0.0359416	0.468783	0.409364	0.291734	0.949458	YES	0.197817	0.581337	YES	0.262186	0.439073	YES	0.657725	0.0441177	Null	0.206633	0.575469	Null
685	chrX:132892141-132892212	n-Ta31|chrX_363_tRNAAla_TGC+	yes	0.0682988	0	-0.104635	0	0	0	0	0	0.0550702	-0.0208668	0	0	-0.0540649	-0.221358	0	0	-0.0181681	0	YES	0.0171017	0	YES	-0.137711	0	YES	0.0181681	0.96361	Null	-0.154813	0.692303	Null
686	chrX:132902260-132902331	n-Ta23|chrX_364_tRNAAla_CGC+	yes	0.248064	20	-0.0144992	3.7	0.210487	60	0.0214045	100	0.536392	0.153505	0.047448	0.0298546	0.0349775	-0.0198194	0	0.0625357	0.116783	0.115946	YES	0.344949	0.0386513	YES	0.00757906	0.0312679	YES	-0.000836784	0.997528	Null	-0.329986	0.335432	Null
687	chrX:132913905-132913976	n-Ta26|chrX_640_tRNAAla_CGC-	yes	-0.104367	100	0.0978976	100	0.0736278	100	0.0972777	100	-0.200368	0.235586	0.108378	0.0591039	-0.134984	0.195929	0.135781	0.0211479	-0.00323464	0.0854527	YES	0.0176091	0.0837409	YES	0.0304726	0.0784645	YES	0.0886873	0.805427	Null	0.0181399	0.977245	Null
688	chrX:132915286-132915357	n-Ta35|chrX_366_tRNAAla_TGC+	yes	-0.392284	0	0.0849246	36	0	0	0	0	-0.0641539	0.4121	0	0	0.244259	0.308959	0	0	-0.15368	0	YES	0.173973	0	YES	0.276609	0	YES	0.15368	0.661951	Null	0.102636	0.803577	Null
689	chrX:132930061-132930132	n-Ta25|chrX_639_tRNAAla_CGC-	yes	-0.104367	100	0.0978976	100	0.0736278	100	0.0972777	100	-0.200368	0.235586	0.108378	0.0591039	-0.150455	0.195929	0.135781	0.0211479	-0.00323464	0.0854527	YES	0.0176091	0.0837409	YES	0.022737	0.0784645	YES	0.0886873	0.805427	Null	0.0104044	0.989961	Null
690	chrX:132931443-132931514	n-Ta36|chrX_368_tRNAAla_TGC+	yes	0.0533902	0	-0.070187	36	0	0	0	0	0.247208	-0.133013	0	0	0.0174018	-0.0188349	0	0	-0.00839837	0	YES	0.0570976	0	YES	-0.000716551	0	YES	0.00839837	0.984961	Null	-0.0578142	0.893873	Null
691	chrX:132936407-132936478	n-Ta24|chrX_369_tRNAAla_CGC+	yes	0.0173328	63.99	0.36174	38.77	0	0	0	0	0.299256	0.100955	0.047448	0	0.0165115	0.415221	0	0	0.189537	0	YES	0.200105	0.023724	YES	0.215866	0	YES	-0.189537	0.577761	Null	0.0394846	0.934465	Null
692	chrX:132964904-132964975	n-Ta33|chrX_637_tRNAAla_TGC-	yes	0.102954	82.6	0.22788	60	0.428762	26.08	0.373363	77.27	-0.0398596	-0.170849	0.0960497	0.47092	0.259837	0.0262012	0.195344	-0.120437	0.165417	0.401062	YES	-0.105354	0.283485	YES	0.143019	0.0374535	YES	0.235645	0.467695	Null	0.494405	0.121225	Null
693	chrX:133088264-133088335	n-Ta32|chrX_371_tRNAAla_TGC+	yes	0.0782198	73.33	0.148578	79.48	0.184031	100	0.507429	100	0.0404588	0.029003	0.0319341	0.429035	0.164399	-0.0988195	0.282161	0.305005	0.113399	0.34573	YES	0.0347309	0.230485	YES	0.0327897	0.293583	YES	0.232331	0.479868	Null	-0.0650394	0.878387	Null
694	chrX:133102404-133102475	n-Ta21|chrX_636_tRNAAla_CGC-	yes	-0.133477	70.37	-0.25933	45.45	0.60748	15.99	0.559074	36.84	-0.112984	0.0948749	0.335608	0.29866	0.167553	-0.0614451	0.366267	0.586945	-0.196404	0.583277	YES	-0.0090547	0.317134	YES	0.053054	0.476606	YES	0.779681	0.013158	Null	-0.0973633	0.815916	Null
695	chrX:133103785-133103856	n-Ta37|chrX_372_tRNAAla_TGC+	yes	0.173045	0	0.149862	0	-0.0236103	5.88	-0.136588	0	-0.180286	0.338344	0.0685557	-0.470464	-0.10498	0.0411361	-0.314702	-0.0682807	0.161453	-0.0800993	YES	0.0790291	-0.200954	YES	-0.0319219	-0.191491	YES	-0.241553	0.455025	Null	-0.120414	0.76733	Null
696	chrX:133104302-133104374	n-Ta20|chrX_373_tRNAAla_CGC+	yes	0.0543026	28.57	0.0821474	17.24	0.230253	57.14	0.181488	66.66	0.0603181	-0.26503	0.480899	0.313898	0.0198801	0.161141	-0.0263311	0.178836	0.068225	0.20587	YES	-0.102356	0.397398	YES	0.0905104	0.0762523	YES	0.137645	0.68552	Null	0.514013	0.103971	Null
697	chrX:133124904-133124975	n-Ta30|chrX_375_tRNAAla_TGC+	yes	-0.251055	0	-0.0978295	0	0.494062	0	0.442258	0	-0.130477	0.0390142	0.586432	0.586713	-0.168319	-0.331576	0.32627	0.389674	-0.174442	0.46816	YES	-0.0457316	0.586572	YES	-0.249947	0.357972	YES	0.642602	0.0399754	Null	0.0243847	0.968255	Null
699	chrX:157204042-157204114	n-Tv23|chrX_459_tRNAVal_TAC+	yes	4.60771	0	4.87683	0	5.4934	0	6.17121	0	2.4574	2.195	3.53281	3.82327	3.017	2.9793	2.37347	2.63937	4.74227	5.83231	NO	2.3262	3.67804	NO	2.99815	2.50642	NO	1.09004	0.00161975	Up	1.84357	4.3964455549538e-11	Up
700	chrX:157573066-157573148	n-Tl23|chrX_462_tRNALeu_TAA+	yes	0.0355739	6.67	0.189414	8.53	0.329321	4.22	0.478591	9.58	0.0676676	-0.00398678	0.345229	0.503871	0.301795	0.272631	0.548346	0.245852	0.112494	0.403956	YES	0.0318404	0.42455	YES	0.287213	0.397099	YES	0.291462	0.365129	Null	0.282824	0.418758	Null
701	chrX:163347665-163347746	n-Ts3|chrX_493_tRNASer_AGA-	yes	-0.394816	0	-0.324166	0	-0.234045	0	-0.122919	0	-0.474061	-0.0500827	-0.499138	-0.36101	-0.515625	-0.0414899	-0.566913	-0.541699	-0.359491	-0.178482	YES	-0.262072	-0.430074	YES	-0.278558	-0.554306	YES	0.181009	0.590535	Null	0.107746	0.793439	Null

## Sheet: Rn5s
	Locus description			Scores: log2((IP tag counts +30)/(Input tag counts+30))																Mean of scores in biological replicates									LIMMA analysis on POLR3D scores, liver vs hepa			LIMMA analysis on POLR3G/POLR3GL score ratios in liver versus hepa
				POLR3D								POLR3G				POLR3GL				POLR3D			POLR3G			POLR3GL			POLR3D			POLR3G/POLR3GL
Number	Locus position with link (NCBI37/mm9)	Locus annotation	Discussed in Canella et al. 2012 ?	Liver Rep 1 score (cut off = 1.1806)	Liver Rep 1 % score from tags with multiple matches	Liver Rep2 score (cut off = 0.9758)	Liver Rep 2 % score from tags with multiple matches	Hepa 1-6 Rep 1 score (cut off = 1.6897)	Hepa 1-6 Rep 1 % score from tags with multiple matches	Hepa 1-6 Rep2 score (cut off = 1.7737)	Hepa 1-6 Rep 2 % score from tags with multiple matches	Liver Rep 1 score (cut off = 1.2630)	Liver Rep 2 score (cut off = 1.1375)	Hepa 1-6 Rep 1 score (cut off = 1.7737)	Hepa 1-6 Rep 2 score (cut off = 1.6605	Liver Rep 1 score (cut off = 1.0931)	Liver Rep 2 score (cut off = 1.0238)	Hepa 1-6 Rep 1 score (cut off = 1.6457)	Hepa 1-6 Rep 2 score (cut off = 1.6308)	Liver mean score (cut off = 1.0782)	Hepa 1-6 mean score (cut off = 1.7317)	Below cut off in both POLR3D liver and POLR3D Hepa 1-6 scores?	Liver mean score (cut off = 1.2003)	Hepa 1-6 mean score cut off = 1.7171)	Below cut off in both POLR3G liver and POLR3G Hepa 1-6 scores?	Liver mean score (cut off = 1.0585)	Hepa 1-6 mean score (cut off = 1.6382)	Below cut off in both POLR3GL liver and POLR3GL Hepa 1-6 scores?	LogFC POLR3D Hepa 1-6 versus liver	adj.P.Val POLR3D Hepa 1-6 versus liver	POLR3D Up/Down in Hepa 1-6 versus liver	LogFC POLR3G/POLR3GL ratio in Hepa 1-6 versus liver	adj.P.Val POLR3G/POLR3GL ratio	POLR3G/POLR3GL ratio Up/Down in Hepa 1-6 versus liver
167	chr6:30297452-30297551	Rn5S|5S_rRNA-	no	0.437675	0	0.0295482	0	3.06638	0	3.42663	0	0.178523	-0.0238617	1.81553	1.8585	-0.129058	-0.0957624	0.877351	1.2447	0.233611	3.24651	NO	0.0773309	1.83702	NO	-0.11241	1.06103	YES	3.0129	6.59317584961878e-10	Up	0.586248	0.0588872	Null
291	chr8:126062686-126062804	Rn5S|5S_rRNA	yes	1.78578	100	1.83976	100	4.79212	100	5.22793	100	0.193841	0.0140079	2.39414	2.84856	0.354366	0.46679	1.67047	2.01322	1.81277	5.01003	NO	0.103925	2.62135	YES	0.410578	1.84185	NO	3.19726	2.19483442704186e-10	Up	1.08616	0.000123343	Up
292	chr8:126064393-126064511	Rn5S|5S_rRNA	yes	0.394163	87.09	0.570023	85.25	3.38244	100	4.02823	99.94	-0.182596	-0.223891	1.06947	1.53645	-0.151027	-0.0543853	0.543986	0.867959	0.482093	3.70533	NO	-0.203243	1.30296	YES	-0.102706	0.705972	YES	3.22324	3.18043148136378e-10	Up	0.697524	0.0199185	Null
293	chr8:126066078-126066196	Rn5S|5S_rRNA	yes	1.0626	98.88	1.19956	94.67	4.61206	100	5.01039	99.98	0.0152438	-0.157904	2.13448	2.63918	0.0553403	0.162988	1.45055	1.82241	1.13108	4.81123	NO	-0.07133	2.38683	YES	0.109164	1.63648	YES	3.68015	2.4182846696335e-11	Up	0.930844	0.001191	Up
294	chr8:126067773-126067891	Rn5S|5S_rRNA	yes	2.18582	100	2.25374	100	4.93349	100	5.29228	100	0.40234	0.184508	2.55233	3.00677	0.514217	0.665817	1.87456	2.22037	2.21978	5.11288	NO	0.293424	2.77955	YES	0.590017	2.04747	NO	2.89311	8.6143282892665e-10	Up	1.02868	0.00029685	Up
295	chr8:126069478-126069596	Rn5S|5S_rRNA	yes	2.21555	100	2.29924	100	5.29017	99.94	5.65595	100	0.407281	0.125525	2.80722	3.26808	0.573048	0.728834	2.05095	2.43241	2.2574	5.47306	NO	0.266403	3.03765	YES	0.650941	2.24168	NO	3.21566	1.74569792610006e-10	Up	1.18051	2.80361302353523e-05	Up
296	chr8:126071165-126071283	Rn5S|5S_rRNA	yes	2.13131	100	2.24014	100	5.16118	100	5.4736	100	0.394324	0.101656	2.72908	3.20275	0.49564	0.658229	2.01589	2.36831	2.18572	5.31739	NO	0.24799	2.96592	YES	0.576935	2.1921	NO	3.13167	2.51713120267156e-10	Up	1.10276	9.68232010965768e-05	Up
297	chr8:126072856-126072974	Rn5S|5S_rRNA	yes	1.95509	100	2.00737	100	4.46786	100	4.7789	100	0.342143	0.0960102	2.05488	2.57848	0.555433	0.479572	1.37739	1.64482	1.98123	4.62338	NO	0.219076	2.31668	YES	0.517503	1.5111	YES	2.64216	3.64769237342028e-09	Up	1.104	9.60375207246321e-05	Up
298	chr8:126074567-126074685	Rn5S|5S_rRNA	yes	2.08404	100	2.17545	100	5.18084	100	5.55143	100	0.361718	0.0738648	2.71212	3.17818	0.494124	0.649482	1.95394	2.33197	2.12974	5.36613	NO	0.217791	2.94515	YES	0.571803	2.14295	NO	3.23639	1.62040690588672e-10	Up	1.1562	4.12013377138262e-05	Up
299	chr8:126076264-126076382	Rn5S|5S_rRNA	yes	2.08404	100	2.17545	100	5.18084	100	5.55143	100	0.361718	0.0738648	2.71212	3.17818	0.494124	0.649482	1.95394	2.33197	2.12974	5.36613	NO	0.217791	2.94515	YES	0.571803	2.14295	NO	3.23639	1.62040690588672e-10	Up	1.1562	4.12013377138262e-05	Up
300	chr8:126079663-126079781	Rn5S|5S_rRNA	yes	2.14112	100	2.19012	100	5.00935	100	5.42937	100	0.369888	0.158971	2.56967	3.01863	0.513065	0.657214	1.82843	2.2074	2.16562	5.21936	NO	0.264429	2.79415	YES	0.585139	2.01792	NO	3.05375	3.96850730804811e-10	Up	1.09694	0.000103767	Up
301	chr8:126081390-126081508	Rn5S|5S_rRNA	yes	2.1459	100	2.21028	100	5.0291	100	5.45683	100	0.448626	0.187748	2.59417	3.03288	0.572855	0.718213	1.84551	2.22594	2.17809	5.24297	NO	0.318187	2.81352	YES	0.645534	2.03573	NO	3.06488	3.96850730804811e-10	Up	1.10514	9.4541602208325e-05	Up
302	chr8:126083101-126083219	Rn5S|5S_rRNA	yes	1.87121	100	1.97079	99.73	3.69238	100	4.28535	100	0.409478	0.167516	1.43376	1.98951	0.419513	0.483929	1.05059	1.1641	1.921	3.98886	NO	0.288497	1.71163	YES	0.451721	1.10735	YES	2.06786	3.45934786740603e-07	Up	0.767511	0.00918279	Null
303	chr8:126084788-126084906	Rn5S|5S_rRNA	yes	2.08404	100	2.17545	100	5.18084	100	5.55143	100	0.361718	0.0738648	2.71212	3.17818	0.494124	0.649482	1.95394	2.33197	2.12974	5.36613	NO	0.217791	2.94515	YES	0.571803	2.14295	NO	3.23639	1.62040690588672e-10	Up	1.1562	4.12013377138262e-05	Up
304	chr8:126086495-126086613	Rn5S|5S_rRNA	yes	0.504609	100	0.632916	100	2.43728	100	3.01768	100	-0.305733	-0.350511	0.480208	0.928742	-0.303808	-0.17583	0.268167	0.460728	0.568762	2.72748	NO	-0.328122	0.704475	YES	-0.239819	0.364448	YES	2.15872	1.73589135473389e-07	Up	0.42833	0.190793	Null
305	chr8:126088186-126088304	Rn5S|5S_rRNA	yes	0.763444	100	1.05213	96.32	2.63013	97	3.29959	96.37	-0.13639	-0.136312	0.597537	2.10487	-0.128242	-0.0329876	1.08199	0.867078	0.907785	2.96486	NO	-0.136351	1.3512	YES	-0.0806149	0.974536	YES	2.05708	5.20730393814794e-07	Up	0.432405	0.18671	Null
306	chr8:126089866-126089987	Rn5S_like|5S_from_RepeatMasker	yes	1.7257	100	1.67615	99.33	4.33779	99.4	4.63779	99.12	0.249146	0.0531282	2.09744	2.4716	0.253151	0.243255	1.4364	1.78246	1.70092	4.48779	NO	0.151137	2.28452	NO	0.248203	1.60943	YES	2.78687	1.45925615094863e-09	Up	0.772155	0.00871682	Null
307	chr8:126091537-126091655	Rn5S|5S_rRNA	yes	2.18582	100	2.25374	100	4.93349	100	5.29228	100	0.40234	0.184508	2.55233	3.00677	0.514217	0.665817	1.87456	2.22037	2.21978	5.11288	NO	0.293424	2.77955	YES	0.590017	2.04747	NO	2.89311	8.6143282892665e-10	Up	1.02868	0.00029685	Up
308	chr8:126093228-126093346	Rn5S|5S_rRNA	yes	2.03366	100	2.02123	100	4.31931	100	4.62987	100	0.442089	0.0889886	1.91607	2.44069	0.622792	0.503516	1.27282	1.55476	2.02745	4.47459	NO	0.265539	2.17838	YES	0.563154	1.41379	YES	2.44715	1.29531758135142e-08	Up	1.06221	0.000179143	Up
309	chr8:126094901-126095019	Rn5S|5S_rRNA	yes	0.504609	100	0.632916	100	2.43728	100	3.01768	100	-0.305733	-0.350511	0.480208	0.928742	-0.303808	-0.17583	0.268167	0.460728	0.568762	2.72748	NO	-0.328122	0.704475	YES	-0.239819	0.364448	YES	2.15872	1.73589135473389e-07	Up	0.42833	0.190793	Null
310	chr8:126096610-126096728	Rn5S|5S_rRNA	yes	2.21134	100	2.24127	100	3.57608	100	4.16706	100	0.711718	0.285938	1.30893	1.98141	0.735441	0.647186	1.00794	1.15274	2.22631	3.87157	NO	0.498828	1.64517	YES	0.691314	1.08034	YES	1.64526	1.02479972917364e-05	Up	0.757312	0.010245	Null
311	chr8:126098297-126098415	Rn5S|5S_rRNA	yes	2.14112	100	2.19012	100	5.00935	100	5.42937	100	0.369888	0.158971	2.56967	3.01863	0.513065	0.657214	1.82843	2.2074	2.16562	5.21936	NO	0.264429	2.79415	YES	0.585139	2.01792	NO	3.05375	3.96850730804811e-10	Up	1.09694	0.000103767	Up
312	chr8:126099976-126100094	Rn5S|5S_rRNA	yes	2.19757	100	2.28907	100	5.30779	100	5.6735	99.98	0.396848	0.154656	2.82811	3.29466	0.582616	0.738344	2.06963	2.45502	2.24332	5.49064	NO	0.275752	3.06138	YES	0.66048	2.26232	NO	3.24732	1.62040690588672e-10	Up	1.18379	2.65409734132423e-05	Up
313	chr8:126101655-126101773	Rn5S|5S_rRNA	yes	2.1459	100	2.21028	100	5.0291	100	5.45683	100	0.448626	0.187748	2.59417	3.03288	0.572855	0.718213	1.84551	2.22594	2.17809	5.24297	NO	0.318187	2.81352	YES	0.645534	2.03573	NO	3.06488	3.96850730804811e-10	Up	1.10514	9.4541602208325e-05	Up
314	chr8:126103350-126103468	Rn5S|5S_rRNA	yes	1.97276	100	1.94646	100	4.54827	100	4.92661	100	0.355022	0.109357	2.25104	2.66151	0.353656	0.372361	1.60681	1.90698	1.95961	4.73744	NO	0.23219	2.45627	YES	0.363008	1.75689	NO	2.77783	1.72763821488354e-09	Up	0.830201	0.00445927	Up
315	chr8:126105055-126105173	Rn5S|5S_rRNA	yes	2.16745	100	2.17733	100	4.23745	100	4.82807	100	0.690763	0.262932	1.78737	2.3506	0.7384	0.63839	1.20109	1.48947	2.17239	4.53276	NO	0.476847	2.06898	YES	0.688395	1.34528	YES	2.36037	4.23481484130043e-08	Up	0.935249	0.00112825	Up
316	chr8:126106747-126106868	Rn5S_like|5S_from_RepeatMasker	yes	2.21308	65.73	2.38411	67.59	2.82337	99.06	3.39612	99.7	0.688868	0.360612	0.899812	1.2999	0.768527	1.02517	0.57234	0.670929	2.2986	3.10975	NO	0.52474	1.09986	YES	0.896848	0.621634	YES	0.811147	0.0137109	Null	0.850331	0.00347216	Up
317	chr8:126108435-126108553	Rn5S|5S_rRNA	yes	0.614676	100	0.718317	100	2.43728	100	3.01768	100	-0.188584	-0.295006	0.480208	0.928742	-0.20527	-0.100736	0.268167	0.460728	0.666496	2.72748	NO	-0.241795	0.704475	YES	-0.153003	0.364448	YES	2.06098	3.53888994525008e-07	Up	0.428819	0.190723	Null
318	chr8:126110142-126110260	Rn5S|5S_rRNA	yes	2.25485	100	2.2711	100	4.97243	100	5.30253	100	0.438566	0.205998	2.6064	3.04698	0.576313	0.677524	1.9099	2.26197	2.26297	5.13748	NO	0.322282	2.82669	YES	0.626918	2.08593	NO	2.8745	9.07836651657163e-10	Up	1.04539	0.000231209	Up
319	chr8:126111859-126111977	Rn5S|5S_rRNA	yes	0.417357	100	0.565674	100	3.3951	100	4.05661	99.94	-0.130238	-0.203355	1.062	1.55037	-0.189424	-0.0932068	0.547071	0.878471	0.491516	3.72585	NO	-0.166796	1.30619	YES	-0.141315	0.712771	YES	3.23434	3.11016125795115e-10	Up	0.618897	0.0435981	Null
320	chr8:126113554-126113672	Rn5S|5S_rRNA	yes	2.1784	100	2.24106	100	4.66389	100	4.97356	100	0.464386	0.175494	2.2458	2.77369	0.692866	0.677	1.55672	1.81209	2.20973	4.81872	NO	0.31994	2.50974	YES	0.684933	1.68441	NO	2.60899	4.58447235930136e-09	Up	1.19033	2.37835460608307e-05	Up
321	chr8:126115271-126115389	Rn5S|5S_rRNA	yes	0.401172	100	0.5853	100	3.60398	100	4.25255	100	-0.216129	-0.30109	1.26585	1.72437	-0.216231	-0.10483	0.678718	0.983578	0.493236	3.92826	NO	-0.258609	1.49511	YES	-0.160531	0.831148	YES	3.43503	1.30799840825408e-10	Up	0.762045	0.00972004	Null
322	chr8:126116968-126117089	Rn5S_like|5S_from_RepeatMasker	yes	2.13709	100	2.1893	100	5.00475	100	5.42434	100	0.366435	0.158835	2.56514	3.01368	0.511328	0.658836	1.82363	2.20245	2.1632	5.21455	NO	0.262635	2.78941	YES	0.585082	2.01304	NO	3.05135	3.96850730804811e-10	Up	1.09882	0.000101585	Up
323	chr8:126118654-126118772	Rn5S|5S_rRNA	yes	2.14112	100	2.19012	100	5.00935	100	5.42937	100	0.369888	0.158971	2.56967	3.01863	0.513065	0.657214	1.82843	2.2074	2.16562	5.21936	NO	0.264429	2.79415	YES	0.585139	2.01792	NO	3.05375	3.96850730804811e-10	Up	1.09694	0.000103767	Up
324	chr8:126120357-126120475	Rn5S|5S_rRNA	yes	2.08404	100	2.17545	100	5.18084	100	5.55143	100	0.361718	0.0738648	2.71212	3.17818	0.494124	0.649482	1.95394	2.33197	2.12974	5.36613	NO	0.217791	2.94515	YES	0.571803	2.14295	NO	3.23639	1.62040690588672e-10	Up	1.1562	4.12013377138262e-05	Up
325	chr8:126122055-126122176	Rn5S_like|5S_from_RepeatMasker	yes	2.09098	87.53	2.26543	84.75	4.87514	98.73	5.20063	98.27	0.285547	0.28935	2.52856	2.96841	0.529537	0.808431	1.84824	2.20587	2.1782	5.03788	NO	0.287449	2.74849	YES	0.668984	2.02705	NO	2.85968	1.05273404273637e-09	Up	1.10297	9.68232010965768e-05	Up
326	chr8:126123761-126123879	Rn5S|5S_rRNA	yes	2.21295	53.78	2.18923	54.06	4.1078	98.06	4.63277	97.87	0.587135	0.201521	1.86276	2.59638	0.561346	0.594855	1.45138	1.46517	2.20109	4.37028	NO	0.394328	2.22957	YES	0.578101	1.45827	YES	2.1692	1.38157437074485e-07	Up	0.955069	0.000865599	Up
327	chr8:126125469-126125580	Rn5S_like|5S_from_RepeatMasker	yes	1.35964	100	1.35848	100	4.0707	100	4.49043	100	0.143615	-0.28875	1.68568	2.2179	0.169588	0.0099325	1.12013	1.45769	1.35906	4.28057	NO	-0.0725675	1.95179	YES	0.0897602	1.28891	YES	2.92151	8.25723208953585e-10	Up	0.825206	0.00473454	Up
328	chr8:126127147-126127265	Rn5S|5S_rRNA	yes	2.14584	100	2.22787	100	5.22724	100	5.59348	100	0.404848	0.146002	2.75356	3.21916	0.573129	0.712753	1.99626	2.37422	2.18686	5.41036	NO	0.275425	2.98636	YES	0.642941	2.18524	NO	3.2235	1.69792436782978e-10	Up	1.16863	3.42312956705265e-05	Up
329	chr8:126128848-126128966	Rn5S|5S_rRNA	yes	2.08404	100	2.17545	100	5.18084	100	5.55143	100	0.361718	0.0738648	2.71212	3.17818	0.494124	0.649482	1.95394	2.33197	2.12974	5.36613	NO	0.217791	2.94515	YES	0.571803	2.14295	NO	3.23639	1.62040690588672e-10	Up	1.1562	4.12013377138262e-05	Up
330	chr8:126130510-126130631	Rn5S_like|5S_from_RepeatMasker	yes	2.12964	100	2.23376	100	5.14879	100	5.46126	100	0.391553	0.0966948	2.71683	3.19067	0.493703	0.652675	2.00385	2.3564	2.1817	5.30503	NO	0.244124	2.95375	YES	0.573189	2.18012	NO	3.12333	2.59124903456203e-10	Up	1.10269	9.68232010965768e-05	Up
331	chr8:126132220-126132338	Rn5S|5S_rRNA	yes	2.08404	100	2.17545	100	5.18084	100	5.55143	100	0.361718	0.0738648	2.71212	3.17818	0.494124	0.649482	1.95394	2.33197	2.12974	5.36613	NO	0.217791	2.94515	YES	0.571803	2.14295	NO	3.23639	1.62040690588672e-10	Up	1.1562	4.12013377138262e-05	Up
332	chr8:126133917-126134035	Rn5S|5S_rRNA	yes	2.04701	97.94	2.09458	97.44	4.06317	96.72	4.42499	96.18	0.313671	0.0622342	1.6814	2.15885	0.436895	0.59377	1.0857	1.50282	2.0708	4.24408	NO	0.187952	1.92013	YES	0.515333	1.29426	YES	2.17329	9.93269096826655e-08	Up	0.953247	0.00088395	Up
333	chr8:126135615-126135733	Rn5S|5S_rRNA	yes	2.18582	100	2.25374	100	4.93349	100	5.29228	100	0.40234	0.184508	2.55233	3.00677	0.514217	0.665817	1.87456	2.22037	2.21978	5.11288	NO	0.293424	2.77955	YES	0.590017	2.04747	NO	2.89311	8.6143282892665e-10	Up	1.02868	0.00029685	Up
334	chr8:126137314-126137432	Rn5S|5S_rRNA	yes	2.1998	100	2.25746	100	5.2054	100	5.49455	100	0.430138	0.122681	2.78205	3.24639	0.557244	0.669896	2.05321	2.41069	2.22863	5.34998	NO	0.27641	3.01422	YES	0.61357	2.23195	NO	3.12135	2.51713120267156e-10	Up	1.11943	7.63662748450379e-05	Up
335	chr8:126138996-126139117	Rn5S_like|5S_from_RepeatMasker	yes	2.13709	100	2.1893	100	5.00475	100	5.42434	100	0.366435	0.158835	2.56514	3.01368	0.511328	0.658836	1.82363	2.20245	2.1632	5.21455	NO	0.262635	2.78941	YES	0.585082	2.01304	NO	3.05135	3.96850730804811e-10	Up	1.09882	0.000101585	Up
336	chr8:126140710-126140828	Rn5S|5S_rRNA	yes	2.16198	97.96	2.19642	96.79	5.06286	98.34	5.4203	98.43	0.426892	0.133873	2.60264	3.11472	0.580273	0.66826	1.87204	2.20971	2.1792	5.24158	NO	0.280382	2.85868	YES	0.624267	2.04087	NO	3.06238	3.79137423513926e-10	Up	1.16169	3.84015012531411e-05	Up
337	chr8:126142433-126142554	Rn5S_like|5S_from_RepeatMasker	yes	2.13709	100	2.1893	100	5.00475	100	5.42434	100	0.366435	0.158835	2.56514	3.01368	0.511328	0.658836	1.82363	2.20245	2.1632	5.21455	NO	0.262635	2.78941	YES	0.585082	2.01304	NO	3.05135	3.96850730804811e-10	Up	1.09882	0.000101585	Up
338	chr8:126144138-126144259	Rn5S_like|5S_from_RepeatMasker	yes	1.783	100	1.83962	100	4.78736	100	5.22261	100	0.191386	0.0141502	2.38941	2.84332	0.353372	0.468595	1.66539	2.00799	1.81131	5.00499	NO	0.102768	2.61636	YES	0.410984	1.83669	NO	3.19368	2.19611934120325e-10	Up	1.08789	0.000120261	Up
339	chr8:126145828-126145946	Rn5S|5S_rRNA	yes	2.03047	98.96	2.10974	99.12	3.70594	91.59	4.03294	92.75	0.269855	0.0796045	1.39083	1.88868	0.422796	0.646464	0.850067	1.1941	2.0701	3.86944	NO	0.17473	1.63975	YES	0.53463	1.02209	YES	1.79934	1.80102118334824e-06	Up	0.977569	0.000625927	Up
340	chr8:126147537-126147645	Rn5S|5S_rRNA	yes	1.36248	100	1.35761	100	4.07217	100	4.49226	100	0.146669	-0.289585	1.68714	2.21976	0.17027	0.00615015	1.12194	1.45958	1.36005	4.28222	NO	-0.0714581	1.95345	YES	0.0882102	1.29076	YES	2.92217	8.25723208953585e-10	Up	0.822356	0.00488733	Up

## Sheet: Other pol III genes
	Locus description			Scores: log2((IP tag counts +30)/(Input tag counts+30))																Mean of scores in biological replicates									LIMMA analysis on POLR3D scores, liver vs hepa			LIMMA analysis on POLR3G/POLR3GL score ratios in liver versus hepa
				POLR3D								POLR3G				POLR3GL				POLR3D			POLR3G			POLR3GL			POLR3D			POLR3G/POLR3GL
Number	Locus position with link (NCBI37/mm9)	Locus annotation	Discussed in Canella et al. 2012 ?	Liver Rep 1 score (cut off = 1.1806)	Liver Rep 1 % score from tags with multiple matches	Liver Rep2 score (cut off = 0.9758)	Liver Rep 2 % score from tags with multiple matches	Hepa 1-6 Rep 1 score (cut off = 1.6897)	Hepa 1-6 Rep 1 % score from tags with multiple matches	Hepa 1-6 Rep2 score (cut off = 1.7737)	Hepa 1-6 Rep 2 % score from tags with multiple matches	Liver Rep 1 score (cut off = 1.2630)	Liver Rep 2 score (cut off = 1.1375)	Hepa 1-6 Rep 1 score (cut off = 1.7737)	Hepa 1-6 Rep 2 score (cut off = 1.6605	Liver Rep 1 score (cut off = 1.0931)	Liver Rep 2 score (cut off = 1.0238)	Hepa 1-6 Rep 1 score (cut off = 1.6457)	Hepa 1-6 Rep 2 score (cut off = 1.6308)	Liver mean score (cut off = 1.0782)	Hepa 1-6 mean score (cut off = 1.7317)	Below cut off in both POLR3D liver and POLR3D Hepa 1-6 scores?	Liver mean score (cut off = 1.2003)	Hepa 1-6 mean score cut off = 1.7171)	Below cut off in both POLR3G liver and POLR3G Hepa 1-6 scores?	Liver mean score (cut off = 1.0585)	Hepa 1-6 mean score (cut off = 1.6382)	Below cut off in both POLR3GL liver and POLR3GL Hepa 1-6 scores?	LogFC POLR3D Hepa 1-6 versus liver	adj.P.Val POLR3D Hepa 1-6 versus liver	POLR3D Up/Down in Hepa 1-6 versus liver	LogFC POLR3G/POLR3GL ratio in Hepa 1-6 versus liver	adj.P.Val POLR3G/POLR3GL ratio	POLR3G/POLR3GL ratio Up/Down in Hepa 1-6 versus liver
49	chr2:27395325-27395450	Rnu6atac|U6atac-	yes	4.72478	0	4.47614	0	6.65192	0	7.13525	0	2.56461	2.19784	4.88232	4.90067	2.99637	2.74261	3.5442	3.79404	4.60046	6.89359	NO	2.38123	4.89149	NO	2.86949	3.66912	NO	2.29313	6.01891077796863e-08	Up	1.71063	7.2796535543816e-10	Up
119	chr4:11181665-11181764	BC1_Mm_scRNA+	no	0.883573	0.18	1.66273	0.28	2.93071	0.16	3.39847	0.06	-0.49606	0.453167	1.4208	1.30246	0.00755768	0.679348	0.461064	0.45073	1.27315	3.16459	NO	-0.0214466	1.36163	YES	0.343453	0.455897	YES	1.89144	3.33047595244827e-06	Up	1.27063	5.60646612588334e-06	Up
126	chr4:43505660-43505930	Rmrp|RNase_MRP-	yes	4.55655	0.18	4.44818	0.12	5.90074	0.12	6.16065	0.19	2.56506	2.06319	3.81721	3.90762	2.69293	2.48061	2.71613	2.97049	4.50236	6.03069	NO	2.31413	3.86241	NO	2.58677	2.84331	NO	1.52833	1.72888949756691e-05	Up	1.29175	3.78162024316763e-06	Up
188	chr6:47731623-47731724	Rny3|Y3_RNA+	yes	3.73648	0	4.28031	0	6.8149	0	7.50042	0	2.11766	2.30909	4.93785	4.90972	2.20417	2.78603	3.66785	3.78073	4.0084	7.15766	NO	2.21337	4.92378	NO	2.4951	3.72429	NO	3.14926	8.25723208953585e-10	Up	1.48122	8.84544554761244e-08	Up
189	chr6:47738068-47738179	Rny1|Y1_RNA-	yes	3.34219	0	2.99457	0	6.02802	0	6.59412	0	1.66649	1.34059	4.37041	4.28819	1.90332	1.45532	2.77952	3.08756	3.16838	6.31107	NO	1.50354	4.3293	NO	1.67932	2.93354	NO	3.14269	4.20055997941708e-10	Up	1.57154	1.37753303214238e-08	Up
345	chr9:62981090-62981196	Rnu6|U6+	yes	2.4443	3.44	2.02396	1.78	6.05997	1.51	6.8148	1.74	1.1033	0.858572	4.16678	4.20329	0.625011	0.49202	2.87236	3.04	2.23413	6.43738	NO	0.980936	4.18504	NO	0.558516	2.95618	NO	4.20325	9.4522833123366e-12	Up	0.806436	0.00587539	Null
351	chr9:78023110-78023440	Rn7sk|7SK-	yes	4.62248	24.06	4.53634	21.28	6.13559	34.12	6.59407	34.15	2.84306	2.28758	3.95786	3.95266	2.82555	2.65711	2.89795	3.32535	4.57941	6.36483	NO	2.56532	3.95526	NO	2.74133	3.11165	NO	1.78542	2.50925983150764e-06	Up	1.01962	0.000338031	Up
374	chr10:79371940-79372046	Rnu6|U6+	yes	4.2524	1.28	3.05005	1.71	5.63944	1.66	6.07511	1.84	2.38051	1.05678	3.70298	3.6197	2.41559	1.28173	2.21064	2.25287	3.65122	5.85727	NO	1.71865	3.66134	NO	1.84866	2.23176	NO	2.20605	1.152814527938e-06	Up	1.55959	1.73534533504797e-08	Up
375	chr10:79448251-79448357	Rnu6|U6+	yes	1.91008	3.82	1.91567	3.76	5.19631	3.22	5.90574	2.88	0.206079	0.443991	3.28042	3.40571	0.600545	0.571499	2.14633	2.41751	1.91287	5.55102	NO	0.325035	3.34307	YES	0.586022	2.28192	NO	3.63815	5.66301738066613e-11	Up	1.32213	2.12961413135633e-06	Up
459	chr12:53704775-53704881	Rnu6|U6-	yes	3.86981	1.55	3.70682	1.52	5.70902	1.78	6.3279	1.99	1.78987	1.42577	3.67745	3.68665	1.8381	2.13403	2.38347	2.63375	3.78832	6.01846	NO	1.60782	3.68205	NO	1.98606	2.50861	NO	2.23014	1.18325652073797e-07	Up	1.55169	2.03585731316294e-08	Up
460	chr12:53705477-53705578	Rnu6|U6-	yes	3.35959	2.73	3.12018	2.2	5.74487	2.56	6.48396	2.62	1.504	0.953616	4.00487	3.97943	1.77646	1.57923	2.83975	2.96926	3.23988	6.11441	NO	1.22881	3.99215	NO	1.67784	2.90451	NO	2.87453	2.58095697488664e-09	Up	1.53668	2.73472233847285e-08	Up
462	chr12:70260298-70260551	Rn7sl|7SLRNA_srpRNA+	yes	5.05356	59.94	5.33008	60.73	5.61349	63.53	6.03052	62.97	2.74736	2.28506	3.54242	3.80934	3.26768	3.32338	2.60278	2.92549	5.19182	5.822	NO	2.51621	3.67588	NO	3.29553	2.76414	NO	0.630183	0.0500671	Null	1.69106	1.0995462630961e-09	Up
463	chr12:70462167-70462478	Rn7sl|7SLRNA_srpRNA-	yes	5.03827	45.9	5.64906	47.28	5.38601	52.76	5.81671	51.8	2.76591	2.58941	3.31908	3.61182	3.12737	3.50883	2.41727	2.71592	5.34367	5.60136	NO	2.67766	3.46545	NO	3.3181	2.56659	NO	0.257694	0.45875	Null	1.5393	2.6032339426144e-08	Up
580	chr14:51427123-51427447	Rpph1|RnasePRNA-	yes	2.90832	0	2.55066	0	4.15974	0	4.62123	0	1.55881	0.29258	2.36856	2.52308	1.18116	0.647475	1.2707	1.67565	2.72949	4.39049	NO	0.925694	2.44582	YES	0.91432	1.47318	YES	1.661	8.8705811799566e-06	Up	0.961273	0.000791869	Up
651	chr18:36961520-36961662	Vaultrc5|Vault+	yes	4.55303	0	4.64146	0	6.32523	0	6.85974	0	2.43837	2.23631	4.48829	4.51154	2.68281	2.96601	3.28588	3.44506	4.59725	6.59248	NO	2.33734	4.49991	NO	2.82441	3.36547	NO	1.99523	5.20730393814794e-07	Up	1.62151	4.68407989929947e-09	Up

## Sheet: Rn4.5s
	Locus description			Scores: log2((IP tag counts +30)/(Input tag counts+30))																Mean of scores in biological replicates									LIMMA analysis on POLR3D scores, liver vs hepa			LIMMA analysis on POLR3G/POLR3GL score ratios in liver versus hepa
				POLR3D								POLR3G				POLR3GL				POLR3D			POLR3G			POLR3GL			POLR3D			POLR3G/POLR3GL
Number	Locus position with link (NCBI37/mm9)	Locus annotation	Discussed in Canella et al. 2012 ?	Liver Rep 1 score (cut off = 1.1806)	Liver Rep 1 % score from tags with multiple matches	Liver Rep2 score (cut off = 0.9758)	Liver Rep 2 % score from tags with multiple matches	Hepa 1-6 Rep 1 score (cut off = 1.6897)	Hepa 1-6 Rep 1 % score from tags with multiple matches	Hepa 1-6 Rep2 score (cut off = 1.7737)	Hepa 1-6 Rep 2 % score from tags with multiple matches	Liver Rep 1 score (cut off = 1.2630)	Liver Rep 2 score (cut off = 1.1375)	Hepa 1-6 Rep 1 score (cut off = 1.7737)	Hepa 1-6 Rep 2 score (cut off = 1.6605	Liver Rep 1 score (cut off = 1.0931)	Liver Rep 2 score (cut off = 1.0238)	Hepa 1-6 Rep 1 score (cut off = 1.6457)	Hepa 1-6 Rep 2 score (cut off = 1.6308)	Liver mean score (cut off = 1.0782)	Hepa 1-6 mean score (cut off = 1.7317)	Below cut off in both POLR3D liver and POLR3D Hepa 1-6 scores?	Liver mean score (cut off = 1.2003)	Hepa 1-6 mean score cut off = 1.7171)	Below cut off in both POLR3G liver and POLR3G Hepa 1-6 scores?	Liver mean score (cut off = 1.0585)	Hepa 1-6 mean score (cut off = 1.6382)	Below cut off in both POLR3GL liver and POLR3GL Hepa 1-6 scores?	LogFC POLR3D Hepa 1-6 versus liver	adj.P.Val POLR3D Hepa 1-6 versus liver	POLR3D Up/Down in Hepa 1-6 versus liver	LogFC POLR3G/POLR3GL ratio in Hepa 1-6 versus liver	adj.P.Val POLR3G/POLR3GL ratio	POLR3G/POLR3GL ratio Up/Down in Hepa 1-6 versus liver
171	chr6:47600760-47600854	Rn4.5s|4.5SRNA_scRNA-	no	3.55185	0	3.24509	0	4.3278	0	4.70431	0	1.25572	0.410383	2.2695	2.40788	1.01427	0.881705	1.34114	1.59228	3.39847	4.51605	NO	0.83305	2.33869	YES	0.947987	1.46671	YES	1.21521	0.000400508	Up	0.988919	0.000322641	Up
172	chr6:47604999-47605093	Rn4.5s|4.5SRNA_scRNA-	no	5.12199	100	5.14579	100	4.37614	100	4.43488	100	2.49011	2.00322	3.25389	3.60915	3.37649	3.31523	2.33154	2.6884	5.13389	4.40551	NO	2.24666	3.43152	NO	3.34586	2.50997	NO	-0.731293	0.0370835	Null	2.02193	4.82171741284251e-13	Up
173	chr6:47609320-47609414	Rn4.5s|4.5SRNA_scRNA-	no	5.28308	98.84	5.30916	98.75	4.47095	99.59	4.46447	99.26	2.65591	2.18192	3.51815	3.8738	3.57687	3.50607	2.547	2.90054	5.29612	4.46771	NO	2.41892	3.69598	NO	3.54147	2.72377	NO	-0.853538	0.0142321	Null	2.09602	1.29904611102246e-13	Up
174	chr6:47613660-47613754	Rn4.5s|4.5SRNA_scRNA-	no	5.12364	100	5.15086	100	4.38345	100	4.44224	100	2.48852	2.01203	3.26159	3.61646	3.37771	3.31998	2.33883	2.69621	5.13725	4.41285	NO	2.25027	3.43902	NO	3.34884	2.51752	NO	-0.734498	0.0364739	Null	2.02125	4.82171741284251e-13	Up
175	chr6:47617996-47618090	Rn4.5s|4.5SRNA_scRNA-	no	5.11755	100	5.12611	100	4.37614	100	4.43488	100	2.48567	1.98354	3.25389	3.60915	3.37205	3.29555	2.33154	2.6884	5.12183	4.40551	NO	2.2346	3.43152	NO	3.3338	2.50997	NO	-0.731293	0.0370835	Null	2.02193	4.82171741284251e-13	Up
176	chr6:47622304-47622398	Rn4.5s|4.5SRNA_scRNA-	no	5.1192	100	5.13111	100	4.38345	100	4.44224	100	2.48407	1.99228	3.26159	3.61646	3.37327	3.30023	2.33883	2.69621	5.12515	4.41285	NO	2.23817	3.43902	NO	3.33675	2.51752	NO	-0.734498	0.0364739	Null	2.02125	4.82171741284251e-13	Up
177	chr6:47626642-47626736	Rn4.5s|4.5SRNA_scRNA-	no	5.1192	100	5.13111	100	4.38345	100	4.44224	100	2.48407	1.99228	3.26159	3.61646	3.37327	3.30023	2.33883	2.69621	5.12515	4.41285	NO	2.23817	3.43902	NO	3.33675	2.51752	NO	-0.734498	0.0364739	Null	2.02125	4.82171741284251e-13	Up
178	chr6:47630963-47631057	Rn4.5s|4.5SRNA_scRNA-	no	5.12199	100	5.14579	100	4.37614	100	4.43488	100	2.49011	2.00322	3.25389	3.60915	3.37649	3.31523	2.33154	2.6884	5.13389	4.40551	NO	2.24666	3.43152	NO	3.34586	2.50997	NO	-0.731293	0.0370835	Null	2.02193	4.82171741284251e-13	Up
179	chr6:47635281-47635375	Rn4.5s|4.5SRNA_scRNA-	no	5.12199	100	5.14579	100	4.37614	100	4.43488	100	2.49011	2.00322	3.25389	3.60915	3.37649	3.31523	2.33154	2.6884	5.13389	4.40551	NO	2.24666	3.43152	NO	3.34586	2.50997	NO	-0.731293	0.0370835	Null	2.02193	4.82171741284251e-13	Up
180	chr6:47689877-47689970	Rn4.5s|4.5SRNA_scRNA-	no	4.51872	67.78	4.65011	67.91	4.45125	65.71	4.50345	67.33	2.18388	1.81254	3.2689	3.64303	2.66264	2.77469	2.42827	2.84866	4.58442	4.47735	NO	1.99821	3.45597	NO	2.71866	2.63846	NO	-0.0725792	0.853797	Null	1.53888	1.45258639582095e-08	Up
181	chr6:47694136-47694230	Rn4.5s|4.5SRNA_scRNA-	no	4.89534	91.9	4.86667	91.24	4.24002	77.81	4.31489	75.35	2.48376	1.89882	3.46362	3.83311	3.21146	3.21167	2.64393	3.06273	4.881	4.27746	NO	2.19129	3.64836	NO	3.21156	2.85333	NO	-0.601314	0.0901925	Null	1.81622	4.38667874571893e-11	Up
182	chr6:47698496-47698590	Rn4.5s|4.5SRNA_scRNA-	no	4.70348	54.48	4.82396	54.61	4.21381	62.8	4.30789	62.99	2.25031	1.97812	3.44345	3.74455	3.02183	3.20677	2.70549	3.11892	4.76372	4.26085	NO	2.11421	3.594	NO	3.1143	2.91221	NO	-0.475154	0.186137	Null	1.68263	6.97943681727287e-10	Up
183	chr6:47702830-47702924	Rn4.5s|4.5SRNA_scRNA-	no	4.74413	100	4.81176	100	4.13647	100	4.16421	100	2.26557	1.82201	3.28422	3.65793	2.9914	3.10557	2.48523	2.89158	4.77794	4.15034	NO	2.04379	3.47107	NO	3.04848	2.6884	NO	-0.633998	0.0731141	Null	1.78822	7.72401689909448e-11	Up
185	chr6:47713262-47713356	Rn4.5s|4.5SRNA_scRNA-	no	4.74413	100	4.81176	100	4.13647	100	4.16421	100	2.26557	1.82201	3.28422	3.65793	2.9914	3.10557	2.48523	2.89158	4.77794	4.15034	NO	2.04379	3.47107	NO	3.04848	2.6884	NO	-0.633998	0.0731141	Null	1.78822	7.72401689909448e-11	Up
244	chr6:128710725-128710819	Rn4.5s|4.5SRNA_scRNA-	yes	3.46581	0.14	3.52476	0.24	2.88152	0	3.58469	0	1.87799	0.871044	1.54442	1.73616	1.89913	1.70309	0.342466	0.58418	3.49529	3.23311	NO	1.37452	1.64029	NO	1.80111	0.463323	NO	-1.44094	2.46124460421337e-05	Down	1.60797	3.4664090429016e-09	Up
245	chr6:128714147-128714241	Rn4.5s|4.5SRNA_scRNA-	yes	4.00966	0	4.31022	0	4.4546	0	4.65617	0	1.94133	1.60073	2.89812	2.87624	2.36195	2.46886	1.77286	1.98918	4.15994	4.55539	NO	1.77103	2.88718	NO	2.41541	1.88102	NO	0.297253	0.424575	Null	1.65271	1.3230580545117e-09	Up
247	chr6:128749420-128749559	Rn4.5s|4.5SRNA_scRNA-	yes	4.26168	0.06	4.14463	0.15	2.14448	0	2.28333	0	1.93435	1.27238	0.863956	0.670504	2.3938	2.1861	0.499855	0.357723	4.20315	2.21391	NO	1.60337	0.76723	NO	2.28995	0.428789	NO	-2.12717	3.96922227422286e-10	Down	1.03313	0.000166342	Up
248	chr6:128753032-128753126	Rn4.5s|4.5SRNA_scRNA-	yes	4.5628	0	4.55959	0	2.06108	0	2.52436	0	2.27081	1.92949	0.767349	1.00263	2.64334	2.61588	0.465349	0.484083	4.56119	2.29272	NO	2.10015	0.884987	NO	2.62961	0.474716	NO	-2.34035	6.2456899101324e-12	Down	0.953222	0.000544457	Up
249	chr6:128788477-128788563	Rn4.5s|4.5SRNA_scRNA+	yes	4.58593	0	4.51685	0	5.38853	0	5.6865	0	2.49609	1.81175	3.43135	3.53802	2.91845	2.5222	2.38015	2.55737	4.55139	5.53751	NO	2.15392	3.48469	NO	2.72033	2.46876	NO	1.00092	0.00378227	Up	1.58496	5.71324036152082e-09	Up
251	chr6:128793305-128793400	Rn4.5s|4.5SRNA_scRNA+	yes	3.9639	0	4.11847	0	4.42785	0	4.74133	0	1.82571	1.52391	2.60716	2.58647	2.27886	2.18125	1.53286	1.8001	4.04119	4.58459	NO	1.67481	2.59682	NO	2.23005	1.66648	NO	0.663375	0.0599397	Null	1.48741	4.33055694600111e-08	Up

## Sheet: SINEs
	Locus description			Scores: log2((IP tag counts +30)/(Input tag counts+30))																Mean of scores in biological replicates									LIMMA analysis on POLR3D scores, liver vs hepa			LIMMA analysis on POLR3G/POLR3GL score ratios in liver versus hepa
				POLR3D								POLR3G				POLR3GL				POLR3D			POLR3G			POLR3GL			POLR3D			POLR3G/POLR3GL
Number	Locus position with link (NCBI37/mm9)	Locus annotation	Discussed in Canella et al. 2012 ?	Liver Rep 1 score (cut off = 1.1806)	Liver Rep 1 % score from tags with multiple matches	Liver Rep2 score (cut off = 0.9758)	Liver Rep 2 % score from tags with multiple matches	Hepa 1-6 Rep 1 score (cut off = 1.6897)	Hepa 1-6 Rep 1 % score from tags with multiple matches	Hepa 1-6 Rep2 score (cut off = 1.7737)	Hepa 1-6 Rep 2 % score from tags with multiple matches	Liver Rep 1 score (cut off = 1.2630)	Liver Rep 2 score (cut off = 1.1375)	Hepa 1-6 Rep 1 score (cut off = 1.7737)	Hepa 1-6 Rep 2 score (cut off = 1.6605	Liver Rep 1 score (cut off = 1.0931)	Liver Rep 2 score (cut off = 1.0238)	Hepa 1-6 Rep 1 score (cut off = 1.6457)	Hepa 1-6 Rep 2 score (cut off = 1.6308)	Liver mean score (cut off = 1.0782)	Hepa 1-6 mean score (cut off = 1.7317)	Below cut off in both POLR3D liver and POLR3D Hepa 1-6 scores?	Liver mean score (cut off = 1.2003)	Hepa 1-6 mean score cut off = 1.7171)	Below cut off in both POLR3G liver and POLR3G Hepa 1-6 scores?	Liver mean score (cut off = 1.0585)	Hepa 1-6 mean score (cut off = 1.6382)	Below cut off in both POLR3GL liver and POLR3GL Hepa 1-6 scores?	LogFC POLR3D Hepa 1-6 versus liver	adj.P.Val POLR3D Hepa 1-6 versus liver	POLR3D Up/Down in Hepa 1-6 versus liver	LogFC POLR3G/POLR3GL ratio in Hepa 1-6 versus liver	adj.P.Val POLR3G/POLR3GL ratio	POLR3G/POLR3GL ratio Up/Down in Hepa 1-6 versus liver
7	chr1:120246867-120247052	B2_Mm2_SINE_B2+	yes	1.77771	0	2.15773	0	-0.166345	0	-0.275851	0	0.497304	0.414465	-0.668803	-0.322438	0.980206	0.970688	-0.684058	-0.681326	1.96772	-0.221098	NO	0.455885	-0.495621	YES	0.975447	-0.682692	YES	-2.18882	9.45654732061458e-08	Down	0.706634	0.0180411	Null
8	chr1:130008960-130009059	B2_Mm2_B2_SINE+	no	1.98177	0	1.87267	0	3.3919	0	4.09294	0	0.815492	0.932727	2.36084	1.96634	0.915182	0.879956	1.54765	1.49211	1.92722	3.74242	NO	0.874109	2.16359	NO	0.897569	1.51988	YES	1.8152	3.45311800683187e-06	Up	0.66717	0.0270237	Null
14	chr1:172930087-172930186	B2_Mm2_SINE-	no	0.309962	0	0.395925	0	2.27222	0	2.60262	0	-0.407124	0.0921812	1.10289	1.16018	-0.14387	-0.0269618	0.234859	0.562449	0.352944	2.43742	NO	-0.157471	1.13153	YES	-0.0854158	0.398654	YES	2.08447	1.81023132924129e-07	Up	0.804934	0.00597357	Null
43	chr1:180241842-180241941	B2_Mm2_B2_SINE-	no	2.09681	0	1.45556	0	0.0343008	0	-0.0481446	0	0.544415	0.0205335	0.66421	0.0614869	1.03584	0.775408	0.029981	0.204934	1.77618	-0.00692189	NO	0.282474	0.362848	YES	0.905625	0.117457	YES	-1.7831	3.82718804232444e-06	Down	0.868542	0.00273803	Up
52	chr2:78964614-78964713	B2_Mm1t_B2_SINE+	no	0.679332	9.25	0.433097	9.27	4.75792	15.05	5.57441	14.35	0.449545	0.139058	3.03935	3.09516	0.136622	-0.00524632	1.86778	2.12378	0.556214	5.16617	NO	0.294302	3.06725	YES	0.0656878	1.99578	NO	4.60995	1.70861245081537e-12	Up	0.84286	0.00380435	Up
53	chr2:80479746-80479845	B1_Mus1_Alu_SINE+	no	0.439947	0	0.368795	0	2.89959	0	3.36867	0	-0.235588	-0.127958	1.60145	1.54032	-0.0494896	0.361192	1.05978	0.805834	0.404371	3.13413	NO	-0.181773	1.57089	YES	0.155851	0.932805	YES	2.72976	2.73884115063968e-09	Up	0.975706	0.000641826	Up
54	chr2:91078023-91078122	B2_Mm1a_B2_SINE+	no	1.61058	0	1.48297	0	2.66541	0	3.43957	0	-0.166635	0.393966	1.73152	1.71052	0.433521	0.60769	1.44255	1.66244	1.54678	3.05249	NO	0.113665	1.72102	NO	0.520606	1.5525	YES	1.50571	5.30622605391684e-05	Up	0.575464	0.0641995	Null
56	chr2:118819929-118820028	B3A_B2_SINE-	no	0.194452	0	-0.129347	0	3.63772	0	4.22517	0	-0.282365	-0.249919	1.91871	2.15768	-0.34514	-0.0381869	1.37771	1.32542	0.0325527	3.93145	NO	-0.266142	2.0382	NO	-0.191663	1.35156	YES	3.8989	2.0884166029509e-11	Up	0.761111	0.00980687	Null
59	chr2:122059558-122059657	B1_Mus2_Alu_SINE-	no	1.01025	0	1.40026	0	3.63675	0	3.97463	0	0.0470212	0.175089	1.9119	1.94662	0.240475	0.348142	1.21566	1.00287	1.20525	3.80569	NO	0.111055	1.92926	YES	0.294309	1.10927	YES	2.60044	7.11536068396287e-09	Up	1.00325	0.000429377	Up
63	chr2:154878649-154878748	B1F2_Alu_SINE-	no	1.23442	0	1.31762	0	0.0694893	0	-0.289879	0	0.944201	0.585257	-0.13548	-0.0706745	0.456832	0.634356	0.0765781	0.0838421	1.27602	-0.110195	NO	0.764729	-0.103077	YES	0.545594	0.0802101	YES	-1.38621	6.83031175276738e-05	Down	-0.402423	0.223021	Null
64	chr2:164681329-164681428	B2_Mm2_B2_SINE+	no	2.65003	0	2.52762	0	-0.0569726	0	0.319599	0	0.657211	0.953435	0.0346297	0.217574	1.47472	1.28057	0.0439177	-0.0383425	2.58883	0.131313	NO	0.805323	0.126102	YES	1.37765	0.0027876	NO	-2.45751	1.39240189968425e-08	Down	0.695639	0.0202999	Null
65	chr2:173043603-173043702	B1_Mus2_Alu_SINE+	no	1.66219	0	1.81575	0	-0.0737941	0	-0.0382267	0	0.492697	0.440154	-0.47877	-0.0420839	0.409272	0.890175	-0.4347	-0.179361	1.73897	-0.0560104	NO	0.466426	-0.260427	YES	0.649724	-0.30703	YES	-1.79498	1.53320519092731e-06	Down	0.229902	0.525967	Null
66	chr2:180926179-180926278	B2_Mm1t_B2_SINE-	no	1.39262	1.55	1.26339	1.88	1.23047	2.47	1.40337	2.66	0.239057	0.112337	0.255541	0.39669	0.450272	0.276947	0.644709	0.327588	1.32801	1.31692	NO	0.175697	0.326115	YES	0.36361	0.486149	YES	-0.0110886	0.980574	Null	0.0278794	0.964158	Null
79	chr3:58506340-58506439	B2_Mm2-B2_SINE-	no	0.159715	0	0.236733	0	3.44045	0	3.96135	0	-0.117376	0.170691	2.08819	2.35138	0.0371443	0.29882	1.54254	1.71236	0.198224	3.7009	NO	0.0266574	2.21979	NO	0.167982	1.62745	YES	3.50267	6.18363185653383e-11	Up	0.733659	0.0133595	Null
83	chr3:94499511-94499610	B1_Mus2_Alu_SINE-	no	2.15422	1.04	1.33656	3.34	-0.252505	11.36	-0.370132	0	0.247977	0.227774	-0.209466	-0.318696	0.70799	0.167083	-0.723279	-0.285152	1.74539	-0.311318	NO	0.237875	-0.264081	YES	0.437536	-0.504215	YES	-2.05671	6.98411945398729e-07	Down	0.439795	0.178564	Null
84	chr3:94739234-94739333	B2_Mm2_B2_SINE-_and_ID_ID_SINE-	no	1.89703	9.93	1.15387	12.89	-0.425096	9.9	-0.417127	9.91	0.843682	-0.0377586	-0.424765	-0.532194	0.526604	0.454283	-0.258463	-0.726943	1.52545	-0.421111	NO	0.402962	-0.478479	YES	0.490443	-0.492703	YES	-1.94656	1.27995734464586e-06	Down	0.101705	0.80545	Null
114	chr3:121992390-121992489	B2_Mm1t_B2_SINE-	no	0.638856	10.06	0.365809	12.42	2.22524	10.49	2.98073	7.4	0.332932	0.0806174	1.06363	1.03262	0.539007	0.219955	0.341955	0.531077	0.502333	2.60298	NO	0.206775	1.04812	YES	0.379481	0.436516	YES	2.10065	4.66669838505376e-07	Up	0.784313	0.00759195	Null
117	chr3:146184477-146184576	B1_Mus2_alu_SINE+	no	1.83456	0	1.37399	0	1.29545	0	1.62579	0	0.469665	0.0923797	-0.0259406	-0.116264	0.901997	0.486785	-0.215816	-0.0873137	1.60427	1.46062	NO	0.281022	-0.0711023	YES	0.694391	-0.151565	YES	-0.143653	0.68552	Null	0.493832	0.121598	Null
125	chr4:40161169-40161268	B2_Mm1t_B2_SINE+	no	0.86622	72.88	0.511539	54.66	2.46294	88.7	3.12961	97.41	0.303661	0.498815	1.27502	1.5642	0.32391	0.150513	0.673468	0.683209	0.68888	2.79627	NO	0.401238	1.41961	YES	0.237212	0.678339	YES	2.10739	3.85441613257727e-07	Up	0.577246	0.0632586	Null
130	chr4:128780080-128780179	B2_Mm1t_B2_SINE+	no	1.39225	21.18	1.44757	12.41	0.839461	9.99	0.744361	35.8	0.501858	0.249754	-0.00220028	0.640678	0.755886	0.660191	0.50991	0.307243	1.41991	0.791911	NO	0.375806	0.319239	YES	0.708039	0.408577	YES	-0.627998	0.0439799	Null	0.242895	0.495184	Null
132	chr4:131972358-131972457	B2_Mm1t_B2_SINE+	no	1.91284	0	1.33669	0	0.509681	0	-0.0152772	0	1.09016	0.58374	0.00767659	0.165922	0.96781	0.682445	0.150288	-0.229141	1.62476	0.247202	NO	0.836948	0.0867995	YES	0.825128	-0.0394263	YES	-1.37756	0.000153851	Down	0.114405	0.778515	Null
135	chr4:135478326-135478425	B2_Mm2_B2_SINE+	no	1.19379	0	1.43582	0	0.987878	0	1.44062	0	0.00187928	0.693651	0.919401	0.497927	0.426078	0.571556	0.711623	0.720566	1.3148	1.21425	NO	0.347765	0.708664	YES	0.498817	0.716094	YES	-0.100555	0.782416	Null	0.143622	0.718304	Null
136	chr4:135550206-135550305	B1_Mus1_Alu_SINE+	no	1.90355	0	1.62902	0	-0.975327	0	-0.669274	0	0.0870663	0.047488	-0.675671	-0.758057	0.76757	0.464703	-0.935832	-0.565935	1.76628	-0.822301	NO	0.0672771	-0.716864	YES	0.616137	-0.750884	YES	-2.58858	6.26934540996345e-09	Down	0.582879	0.0600929	Null
138	chr4:141510536-141510635	B4_B4_SINE-	no	1.52704	0	1.13933	0	-0.0992607	0	0.020578	0	0.265352	-0.173731	-0.537046	-0.107068	0.342852	0.618281	-0.0467514	0.0431562	1.33319	-0.0393413	NO	0.0458107	-0.322057	YES	0.480567	-0.0017976	YES	-1.37253	8.12461313103079e-05	Down	0.114497	0.778515	Null
141	chr5:30439143-30439242	B2_Mm2_B2_SINE-	no	2.63532	0	2.67465	0	-0.0239336	0	-0.272812	0	0.947488	0.455387	-0.318226	-0.0251295	1.40617	1.37103	0.257954	-0.371583	2.65498	-0.148373	NO	0.701438	-0.171678	YES	1.3886	-0.0568145	NO	-2.80336	1.20482466823266e-09	Down	0.5723	0.0660614	Null
144	chr5:33205445-33205544	B1_Mus2_Alu_SINE-	no	1.77356	0	1.15802	0	0.884085	0	1.17212	0	0.562912	0.25809	0.276401	0.662165	0.775329	0.510059	0.471546	0.0300161	1.46579	1.0281	NO	0.410501	0.469283	YES	0.642694	0.250781	YES	-0.43769	0.187496	Null	0.450695	0.165436	Null
145	chr5:54383776-54383875	B2_Mm2_B2_SINE-	no	1.50146	0	1.21944	0	-0.811221	0	-0.567914	0	0.142405	0.127959	-0.883123	-0.778229	0.594462	0.178368	-0.737533	-0.576974	1.36045	-0.689567	NO	0.135182	-0.830676	YES	0.386415	-0.657253	YES	-2.05002	2.4277750596858e-07	Down	0.0778102	0.852018	Null
146	chr5:65926870-65927025	B2_Mm2_SINE_B2+	yes	2.58072	0	2.32321	0	2.79915	0	3.29371	0	0.921568	0.788459	1.18465	1.38101	1.54408	1.26724	0.349536	0.629519	2.45197	3.04643	NO	0.855013	1.28283	YES	1.40566	0.489528	NO	0.594462	0.0672065	Null	1.34395	1.39603661213168e-06	Up
147	chr5:92781746-92781845	B2_Mm1a_B2_SINE-_and_RLTR13D2_ERVK_LTR-	no	0.611209	5.5	0.640802	5.39	3.92834	2.68	4.50583	3.01	0.18067	-0.156687	2.44288	2.92508	0.180375	0.311375	1.50485	1.49482	0.626006	4.21708	NO	0.0119916	2.68398	YES	0.245875	1.49984	YES	3.59108	5.33730136633132e-11	Up	1.41803	3.22868438608736e-07	Up
148	chr5:93139643-93139742	B2_Mm2_B2_SINE-	no	2.47881	0	2.33436	0	-0.352172	0	-0.434012	0	0.906883	0.549451	-0.658329	-0.266551	1.22145	1.09073	-0.193171	-0.337195	2.40659	-0.393092	NO	0.728167	-0.46244	YES	1.15609	-0.265183	NO	-2.79968	1.13765820372711e-09	Down	0.230669	0.525785	Null
152	chr5:115002158-115002423	B2_Mm2_SINE_B2-	yes	3.39123	0	3.1584	0	1.54783	0	2.02806	0	1.58284	0.973489	0.539974	0.430164	1.69686	1.50435	0.0585456	0.27397	3.27482	1.78794	NO	1.27817	0.485069	NO	1.60061	0.166258	NO	-1.48687	3.63163611453779e-05	Down	0.641251	0.0351485	Null
158	chr5:134651370-134651469	PB1D7_alu_SINE-	no	-0.484649	0	-0.152664	0	2.54828	0	3.03567	0	-0.396059	-0.0911188	1.28683	1.19274	-0.211014	-0.518536	0.511241	0.884615	-0.318656	2.79198	NO	-0.243589	1.23979	YES	-0.364775	0.697928	YES	3.11063	4.17744156606571e-10	Up	0.420672	0.199426	Null
159	chr5:135372305-135372576	B3_SINE_B2-	yes	1.24098	0	1.73472	0	0.15179	0	0.300053	0	-0.123999	0.349994	-1.03178	-0.834613	0.156167	0.556237	-0.638819	-0.0447668	1.48785	0.225921	NO	0.112997	-0.933197	YES	0.356202	-0.341793	YES	-1.26193	0.000256421	Down	-0.3482	0.306371	Null
160	chr5:137775343-137775442	B1_Mus1_Alu_SINE+	no	1.56529	0	1.87651	0	1.75951	0	2.36243	0	0.328862	0.306942	0.474875	0.743201	0.350911	0.720719	0.123029	-0.00271045	1.7209	2.06097	NO	0.317902	0.609038	YES	0.535815	0.0601595	YES	0.340069	0.313527	Null	0.766791	0.00924096	Null
161	chr5:140252062-140252161	B2_Mus1_Alu_SINE+	no	0.895923	0	0.745111	0	2.61704	0	3.16515	0	-0.109265	-0.063721	1.20607	1.42434	0.0154913	-0.0800533	1.09581	0.998083	0.820517	2.89109	NO	-0.0864931	1.3152	YES	-0.032281	1.04694	YES	2.07058	3.12134283078369e-07	Up	0.322472	0.347708	Null
168	chr6:35127220-35127319	B1_Mm_Alu_SINE-	no	0.347723	0	0.193558	0	2.13901	0	2.70295	0	0.0155089	-0.133175	0.497034	0.883725	-0.0734532	0.132135	0.230582	0.332486	0.27064	2.42098	NO	-0.0588328	0.690379	YES	0.029341	0.281534	YES	2.15034	1.79582917010153e-07	Up	0.497019	0.118724	Null
169	chr6:38287916-38288126	B2_Mm2_SINE_B2-	yes	2.71464	0	3.07733	0	-0.455762	0	0.23202	0	0.850872	1.26716	-0.412543	-0.478409	1.42834	1.66066	-0.268891	-0.222093	2.89598	-0.111871	NO	1.05902	-0.445476	YES	1.5445	-0.245492	NO	-3.00785	1.20482466823266e-09	Down	0.285499	0.414284	Null
242	chr6:120876571-120876670	B2_Mm1a_B2_SINE-_and_B1_Mus1_Alu_SINE-	no	1.92756	0	1.87344	0	0.823164	0	1.37758	0	0.277548	0.132685	0.356453	0.702943	0.979386	0.872155	0.129055	0.539118	1.9005	1.10037	NO	0.205116	0.529698	YES	0.925771	0.334087	YES	-0.800127	0.0144019	Null	0.916266	0.00145168	Up
243	chr6:128710011-128710362	B4A_SINE_B4-	yes	4.03196	14.82	4.36612	14.49	5.49361	12.96	5.87599	11.95	2.20806	1.6459	3.59783	3.738	2.43857	2.47078	2.44296	2.6763	4.19904	5.6848	NO	1.92698	3.66791	NO	2.45468	2.55963	NO	1.48576	3.51052658341786e-05	Up	1.63598	3.42086645497569e-09	Up
246	chr6:128748852-128749049	B4A_SINE_B4-	yes	4.39239	14.77	4.49302	15.89	4.25207	97.01	4.5604	93.71	2.31549	1.87816	2.27308	2.62571	2.70432	2.75155	1.31788	1.63665	4.44271	4.40623	NO	2.09683	2.4494	NO	2.72794	1.47727	NO	-0.0364736	0.923305	Null	1.60324	6.8786023328247e-09	Up
250	chr6:128788924-128789196	B4A_SINE_B4+	yes	4.41071	1.45	4.42423	1.26	5.15913	1.11	5.55077	1.19	2.1723	1.61638	3.32493	3.37299	2.55795	2.33649	1.98071	2.25698	4.41747	5.35495	NO	1.89434	3.34896	NO	2.44722	2.11884	NO	0.937476	0.00384819	Up	1.783	1.551142678433e-10	Up
252	chr6:128796113-128796212	B2_Mm1a_B2_SINE-	no	0.727884	6.23	0.426549	7.89	2.57618	6.75	2.98177	7.88	-0.249805	-0.285942	1.29392	1.3449	0.271264	-0.257937	0.493074	0.824464	0.577216	2.77897	NO	-0.267874	1.31941	YES	0.00666337	0.658769	YES	2.20176	1.04696821884649e-07	Up	0.935178	0.00112825	Up
254	chr6:149096989-149097088	B2_Mm1t_B2_SINE-	no	1.5878	0	1.51008	0	0.92445	0	0.182238	0	1.10145	0.256571	0.385611	0.32614	0.630088	0.623613	0.0981319	0.681024	1.54894	0.553344	NO	0.679012	0.355875	YES	0.62685	0.389578	YES	-0.995595	0.00361136	Down	-0.0858643	0.834306	Null
261	chr7:52740591-52740766	B2_Mm2_SINE_B2+	yes	1.5266	0	1.853	0	-0.322581	0	0.274819	0	-0.309223	0.251467	-0.758272	-0.397407	0.463999	0.486109	-0.609641	-0.707227	1.6898	-0.0238811	NO	-0.0288782	-0.577839	YES	0.475054	-0.658434	YES	-1.71368	7.12042548610999e-06	Down	0.584527	0.0595082	Null
262	chr7:54241133-54241232	B2_Mm2_B2_SINE-	no	1.48939	0.35	1.81165	0.41	0.54132	0.56	0.473893	0.24	0.504346	0.448824	-0.0664393	-0.324581	0.743176	0.767276	-0.205252	0.375834	1.65052	0.507607	NO	0.476585	-0.19551	YES	0.755226	0.0852914	YES	-1.14291	0.000586868	Down	-0.00216089	0.996173	Null
263	chr7:59763599-59763698	B3_B2_SINE+	no	1.95042	0	2.04449	0	0.554663	0	0.855431	0	0.197882	0.489469	0.411555	0.705829	0.663243	0.943522	0.153087	0.173273	1.99745	0.705047	NO	0.343675	0.558692	YES	0.803383	0.16318	YES	-1.2924	0.000150207	Down	0.855219	0.00326981	Up
269	chr7:117336693-117336856	B1_Mus1_SINE_Alu-	yes	3.015	0	2.70684	0	-0.0400922	0	0.191305	0	1.26438	0.889791	-0.182086	0.0891828	1.47851	1.27021	-0.193171	0.0247641	2.86092	0.0756062	NO	1.07709	-0.0464518	YES	1.37436	-0.0842036	NO	-2.78531	1.67436922722497e-09	Down	0.335022	0.329119	Null
271	chr7:127986097-127986293	B1_Mus1_SINE_Alu-	yes	2.44977	0	2.25939	0	3.78256	0	4.40833	0	0.514349	-0.0350392	2.00595	2.09217	0.585248	0.547684	1.10942	1.38746	2.35458	4.09545	NO	0.239655	2.04906	YES	0.566466	1.24844	YES	1.74086	5.44516936697321e-06	Up	1.12743	6.68537710397982e-05	Up
273	chr7:128062206-128062333	MIR_SINE_MIR-	yes	4.97921	0	5.43905	0	6.48272	0	7.24396	0	2.78926	3.06908	4.64592	4.65725	3.41441	4.0145	3.68275	3.89082	5.20913	6.86334	NO	2.92917	4.65159	NO	3.71445	3.78678	NO	1.65421	2.02283877626388e-05	Up	1.65009	2.54959371084167e-09	Up
274	chr7:128147749-128147848	B2_Mm1t_B2_SINE+	no	1.95606	6.51	1.50243	11.97	0.0180621	12.23	0.0352998	12	0.404585	0.311455	-0.562859	-0.332921	0.52945	0.384406	-0.421912	-0.250955	1.72925	0.026681	NO	0.35802	-0.44789	YES	0.456928	-0.336434	YES	-1.70257	4.99040627679741e-06	Down	-0.0125486	0.9873	Null
275	chr7:133786811-133786910	B2_Mm1a_B2_SINE-	no	1.64314	29.54	2.01266	23.91	3.27637	28.96	3.98651	30.84	0.044206	0.405713	1.87422	1.80921	0.753018	0.622397	1.00391	0.872953	1.8279	3.63144	NO	0.224959	1.84171	YES	0.687708	0.93843	YES	1.80354	4.83257366584372e-06	Up	1.36603	9.16197808337063e-07	Up
276	chr7:133824516-133824806	B1_Mus1_SINE_Alu-	yes	2.6909	0	3.10484	0	0.436022	0	0.919758	0	0.865031	1.08112	-0.230421	-0.118549	1.22468	1.52121	-0.0274249	-0.368658	2.89787	0.67789	NO	0.973077	-0.174485	YES	1.37295	-0.198042	NO	-2.21998	1.2610858511393e-07	Down	0.423426	0.196885	Null
278	chr8:14842649-14843098	B2_Mm2_SINE_B2+	yes	2.68835	0	3.17725	0	0.606182	0	0.788666	0	0.819573	1.32937	-0.0749737	0.304528	1.24128	1.85355	0.179561	0.18228	2.9328	0.697424	NO	1.07447	0.114777	YES	1.54742	0.180921	NO	-2.23538	8.63650347593403e-08	Down	0.406803	0.217347	Null
282	chr8:86809783-86809882	B3_B2_SINE+_and_B1_Mm_Alu_SINE+	no	0.922958	4.9	0.321718	3.6	3.04752	1.94	3.41901	2.92	0.48637	0.519652	1.38621	1.39453	0.322824	-0.000564852	1.03401	1.15286	0.622338	3.23327	NO	0.503011	1.39037	YES	0.16113	1.09344	YES	2.61093	1.07364142569113e-08	Up	-0.0449532	0.922419	Null
283	chr8:87404850-87404949	B2_Mm2_B2_SINE-	no	1.38011	0	2.01645	0	3.11452	0	3.67399	0	0.521639	0.37198	1.65295	1.74302	0.591265	0.803789	0.869471	1.00905	1.69828	3.39425	NO	0.446809	1.69798	YES	0.697527	0.939259	YES	1.69598	1.27564994647782e-05	Up	1.00944	0.000391318	Up
288	chr8:113522107-113522266	B2_Mm1t_SINE_B2+	yes	2.84401	0	2.34279	0	3.50943	0	3.9609	0	0.577991	0.217472	1.98634	2.0138	0.83558	0.641964	0.887464	0.953393	2.5934	3.73517	NO	0.397732	2.00007	YES	0.738772	0.920429	YES	1.14177	0.000943839	Up	1.42068	3.08069054901274e-07	Up
341	chr8:126149708-126149807	B2_Mm2_B2_SINE-	no	1.46588	0	1.73376	0	2.67504	0	2.91306	0	-0.310055	0.159294	1.17966	1.10991	0.450702	0.966587	0.676341	0.596187	1.59982	2.79405	NO	-0.0753801	1.14479	YES	0.708645	0.636264	YES	1.19424	0.000379459	Up	1.29255	3.73867187098996e-06	Up
343	chr9:46080760-46081111	B2_Mm1a_SINE_B2-	yes	1.75901	0	1.75696	0	0.556749	0	1.005	0	0.698084	0.559067	-0.200451	0.0393758	1.01822	1.15874	-0.12871	-0.122041	1.75798	0.780874	NO	0.628575	-0.0805378	YES	1.08848	-0.125376	NO	-0.977111	0.00288744	Down	0.50474	0.111806	Null
347	chr9:65049244-65049401	B2_Mm1a_SINE_B2+	yes	2.63318	0.51	3.05044	0.35	1.9063	0	2.39332	0.05	0.679866	1.07915	0.607145	0.948686	1.55441	1.85545	1.03014	1.14039	2.84181	2.14981	NO	0.879506	0.777916	YES	1.70493	1.08526	NO	-0.691997	0.035775	Null	0.518076	0.101234	Null
348	chr9:66003087-66003186	B2_Mm2_B2_SINE-	no	1.67191	0	1.87146	0	-0.238806	0	0.0955633	0	0.424302	1.04582	0.269833	-0.0647166	0.566697	0.802581	0.10653	-0.0879298	1.77169	-0.0716212	NO	0.735062	0.102558	YES	0.684639	0.00929986	YES	-1.84331	1.33058332124881e-06	Down	0.0428352	0.925566	Null
349	chr9:66919915-66920014	B2_Mm2_B2_SINE-	no	1.78641	0	2.28413	0	2.11955	0	2.48774	0	0.617203	0.50192	0.948812	0.655101	0.802572	0.839652	0.0205257	0.309568	2.03527	2.30365	NO	0.559562	0.801957	YES	0.821112	0.165047	YES	0.268382	0.428741	Null	0.898461	0.0018516	Up
356	chr9:107551368-107551823	B2_Mm2_SINE_B2-	yes	1.89011	0	2.43847	0	0.0599648	0	0.318962	0	0.406164	0.839281	-0.283626	-0.179161	0.545844	1.22627	-0.274118	-0.508317	2.16429	0.189463	NO	0.622722	-0.231394	YES	0.886059	-0.391218	YES	-1.97482	7.06767699337513e-07	Down	0.423161	0.196901	Null
357	chr9:109833765-109833864	B1_Mm_Alu_SINE-	no	1.35565	0	1.01555	0	3.42292	0	4.0237	0	0.0875142	0.092241	1.98383	2.25174	0.410298	0.312242	1.06147	1.40844	1.1856	3.72331	NO	0.0898776	2.11779	YES	0.36127	1.23495	YES	2.53771	1.64852493830396e-08	Up	1.15423	4.24983329562286e-05	Up
360	chr10:8702849-8702948	B2_Mm2_B2_SINE+	no	1.48267	0	1.43837	0	0.856177	0	0.61574	0	0.21108	-0.0226356	0.903945	0.818521	0.573921	0.280392	0.602739	0.401131	1.46052	0.735958	NO	0.0942221	0.861233	YES	0.427156	0.501935	YES	-0.724558	0.0212301	Null	0.692233	0.0210453	Null
362	chr10:19798427-19798526	B2_Mm1t_B2_SINE+	no	1.9681	0.2	1.84363	0.69	0.0333324	0	-0.40249	0	0.355657	0.532397	0.109257	-0.352122	0.678438	0.575951	-0.241289	0.112097	1.90587	-0.184579	NO	0.444027	-0.121432	YES	0.627195	-0.0645962	YES	-2.09044	2.10018590304029e-07	Down	0.126332	0.754813	Null
366	chr10:62255334-62255433	B1_Mus1_Alu_SINE+	no	0.998979	0	1.23613	0	2.67685	0	3.23874	0	0.0456433	0.298941	1.08479	1.36601	-0.212126	0.2035	0.350965	0.72639	1.11756	2.95779	NO	0.172292	1.2254	YES	-0.00431316	0.538677	YES	1.84024	2.14854571890911e-06	Up	0.510116	0.107436	Null
368	chr10:62866100-62866281	B3_SINE_B2+	yes	3.82274	0	3.59745	0	1.75154	0	1.98021	0	1.77344	1.23835	0.674956	0.615485	2.24774	2.06218	0.101674	0.22824	3.7101	1.86587	NO	1.5059	0.645221	NO	2.15496	0.164957	NO	-1.84422	1.18839576239161e-06	Down	1.12933	6.49508103247241e-05	Up
370	chr10:70786302-70786504	B2_Mm1a_SINE_B2-	yes	2.13739	6.48	2.3444	5.48	-0.687648	9.16	-1.22399	8.78	0.665819	0.387686	-0.963372	-1.16852	0.527557	0.938269	-0.415975	-0.891379	2.2409	-0.95582	NO	0.526753	-1.06595	YES	0.732913	-0.653677	YES	-3.19672	2.86146027524238e-10	Down	-0.206109	0.575669	Null
371	chr10:74967299-74967451	B3_SINE_B2+	yes	2.63603	0	3.06488	0	0.14185	0	0.459613	0	0.930712	0.717666	-0.111122	-0.411958	1.11978	1.27719	-0.400098	-0.317877	2.85045	0.300732	NO	0.824189	-0.26154	YES	1.19849	-0.358988	NO	-2.54972	1.00358397413273e-08	Down	0.471746	0.143025	Null
373	chr10:79355503-79355602	B2_Mm1a_B2_SINE-	no	1.03058	1.06	1.28313	0.59	1.71622	0	2.46171	0.09	0.210385	0.21773	0.707471	0.810259	0.296458	0.240825	0.305855	0.66114	1.15685	2.08897	NO	0.214057	0.758865	YES	0.268641	0.483497	YES	0.932114	0.00652843	Null	0.329952	0.335432	Null
378	chr10:79786931-79787030	B1F2_Alu_SINE+_and_B2_Mm1a_B2_SINE+	no	2.42121	2.4	2.55632	2.86	2.83987	3.9	3.84265	2.61	0.562542	0.763784	1.76344	1.85052	0.806481	0.815183	1.30668	1.48326	2.48876	3.34126	NO	0.663163	1.80698	NO	0.810832	1.39497	YES	0.852498	0.0165345	Null	0.559679	0.0731803	Null
383	chr10:119656419-119656518	B2_Mm1a_B2_SINE+	no	0.0691224	0	0.50037	0	2.63273	0	3.44214	0	0.0303488	0.346699	1.62299	1.38101	-0.668971	-0.0311259	0.957823	0.68291	0.284746	3.03744	NO	0.188524	1.502	YES	-0.350048	0.820366	YES	2.75269	8.8076502302783e-09	Up	0.143062	0.718304	Null
384	chr10:126508214-126508433	B3_SINE_B2-	yes	2.64897	0	2.42934	0	-0.0247262	0	0.0499268	0	1.24586	0.546047	-0.620616	-0.479081	1.2658	1.20896	-0.367066	-0.560955	2.53915	0.0126003	NO	0.895952	-0.549848	YES	1.23738	-0.46401	NO	-2.52655	7.11536068396287e-09	Down	0.255588	0.47048	Null
385	chr10:126597026-126597125	B1_Mus1_Alu_SINE-	no	1.69154	0	1.81226	0	0.205512	0	0.364735	0	0.300955	0.141094	-0.10699	0.0989185	0.694343	0.561186	0.365884	-0.0503947	1.7519	0.285124	NO	0.221024	-0.00403557	YES	0.627765	0.157745	YES	-1.46678	2.79347228450827e-05	Down	0.24496	0.49138	Null
386	chr10:127071228-127071327	B1_Mus2_Alu_SINE-	no	1.51808	0	1.34912	0	-0.2512	0	-0.200526	0	0.645452	0.0514416	-0.661457	-0.394157	0.232751	0.341056	-0.125496	-0.237512	1.4336	-0.225863	NO	0.348447	-0.527807	YES	0.286903	-0.181504	YES	-1.65946	5.06418229348313e-06	Down	-0.407847	0.215993	Null
397	chr11:48676608-48676707	B2_Mm2_B2_SINE+	no	1.14791	0	1.03189	0	3.27737	0	3.83233	0	0.0678768	0.0241203	1.79829	1.93035	0.414648	0.595352	0.804088	1.09446	1.0899	3.55485	NO	0.0459986	1.86432	YES	0.505	0.949273	YES	2.46495	1.92284961570193e-08	Up	1.37405	7.81120528635812e-07	Up
398	chr11:48686457-48686556	B1_Mur1_Alu_SINE-	no	0.508417	0	0.795122	0	2.35877	0	3.05967	0	-0.038217	0.0749558	1.40656	1.17637	0.242491	0.00506766	0.755302	0.694977	0.65177	2.70922	NO	0.0183694	1.29146	YES	0.123779	0.725139	YES	2.05745	5.59501774126005e-07	Up	0.671734	0.0259459	Null
399	chr11:48689042-48689141	B2_Mm2_B2_SINE-_and_Lx7_L1_LINE-	no	0.717375	0	0.848886	0	2.28199	0	2.73958	0	-0.0755614	0.190316	0.283023	0.554734	0.294354	0.298492	0.372389	0.229581	0.78313	2.51078	NO	0.0573772	0.418878	YES	0.296423	0.300985	YES	1.72765	4.22243930372989e-06	Up	0.356939	0.295065	Null
400	chr11:49998672-49998771	B2_Mm2_B2_SINE+	no	1.34421	0	1.2328	0	4.79555	0	5.49542	0	0.0373162	0.163627	3.23032	3.5206	0.513984	0.159356	2.34143	2.39258	1.2885	5.14548	NO	0.100472	3.37546	YES	0.33667	2.367	NO	3.85698	2.31343069008914e-11	Up	1.24465	8.94533583227401e-06	Up
418	chr11:68889367-68889466	B2_Mm1t_B2_SINE-_and_B1_Mur3_alu_SINE-	no	1.74993	22.27	0.974074	22.4	3.841	22.5	4.53259	24.91	-0.00180863	0.209411	2.26442	2.47689	0.747315	0.543321	1.36336	1.6644	1.362	4.18679	NO	0.103801	2.37066	YES	0.645318	1.51388	YES	2.8248	8.89799294322099e-09	Up	1.3983	4.81747430272313e-07	Up
426	chr11:69355229-69355328	B2_Mm2_B2_SINE+_and_B2_Mm1a_B2_SINE+	no	0.402812	23.83	0.434486	16.67	2.53935	18.96	3.24621	21.05	0.330143	0.0119249	1.30747	1.26224	0.00568984	0.0857794	0.637413	0.627156	0.418649	2.89278	NO	0.171034	1.28485	YES	0.0457346	0.632285	YES	2.47413	2.61788046281034e-08	Up	0.52727	0.0946374	Null
428	chr11:75160470-75160569	B2_Mm1a_B2_SINE+	no	1.53469	9.5	0.765863	8.8	1.92893	10.79	2.551	10.37	0.655215	-0.137843	0.779015	0.78649	0.762276	0.162496	0.396793	0.2194	1.15028	2.23997	NO	0.258686	0.782752	YES	0.462386	0.308096	YES	1.08969	0.00259715	Up	0.678356	0.0242858	Null
429	chr11:75237773-75237872	B1_Mur4_Alu_SINE+	no	1.23007	0	1.2938	0	0.170877	0	-0.127594	0	0.103088	0.361858	0.20233	0.27699	-0.0734532	0.459254	-0.228885	0.0526608	1.26194	0.0216413	NO	0.232473	0.23966	YES	0.1929	-0.0881123	YES	-1.2403	0.000239307	Down	0.2882	0.408626	Null
438	chr11:97652293-97652392	B2_Mm1a_B2_SINE+	no	0.850228	0	0.856114	0	3.36943	0	3.89382	0	0.328369	0.520539	2.31815	2.25911	0.498163	0.614358	1.46008	1.54344	0.853171	3.63162	NO	0.424454	2.28863	YES	0.556261	1.50176	YES	2.77845	2.29634323846192e-09	Up	0.918681	0.00140646	Up
443	chr11:97855307-97855406	B2_Mm2_B2_SINE+	no	2.9066	0	2.76158	0	3.18795	0	3.75356	0	0.771258	0.980837	1.6109	1.62258	1.67174	1.60441	1.09789	0.984863	2.83409	3.47075	NO	0.876048	1.61674	YES	1.63807	1.04138	NO	0.636663	0.0504078	Null	1.33739	1.58522004996836e-06	Up
445	chr11:101466556-101466655	B2_Mm1t_B2_SINE-_and_B2_Mm2_B2_SINE-	no	0.929416	2.59	0.618725	3.59	2.94659	0.76	3.72959	0.69	0.137663	-0.0892497	1.72329	1.75139	0.311732	-0.0346602	1.45208	1.40986	0.77407	3.33809	NO	0.0242066	1.73734	NO	0.138536	1.43097	YES	2.56402	2.21857073396446e-08	Up	0.420698	0.199426	Null
448	chr11:101859884-101859983	B2_Mm2_B2_SINE+	no	0.863425	0	0.271253	0	3.62746	0	4.23339	0	0.40592	0.00769013	2.14996	2.10136	0.0780301	-0.155198	1.22614	1.34482	0.567339	3.93043	NO	0.206805	2.12566	NO	-0.0385837	1.28548	YES	3.36309	2.75917266264789e-10	Up	0.594795	0.0546901	Null
465	chr12:82631757-82631856	B2_Mm1t_B2_SINE+_and_MTD_MaLR_LTR-	no	-0.047049	25.86	0.116494	19.18	3.55952	8.08	4.05902	8.12	-0.491644	-0.319473	2.04934	2.17579	-0.297799	-0.225938	1.3112	1.72876	0.0347225	3.80927	NO	-0.405558	2.11256	NO	-0.261868	1.51998	YES	3.77455	2.09084597534696e-11	Up	0.736276	0.0129906	Null
466	chr12:86493988-86494179	B3A_SINE_B2-	yes	2.77578	0	2.47385	0	1.10458	0	1.99459	0	1.12336	0.656352	0.0189977	0.400756	1.20338	0.964327	-0.345198	-0.130838	2.62482	1.54959	NO	0.889854	0.209877	YES	1.08385	-0.238018	NO	-1.07523	0.00265165	Down	0.641893	0.0349895	Null
575	chr13:25022629-25022811	B2_Mm1t_SINE_B2+	yes	2.36177	0	2.11748	0	0.36056	0	0.893457	0	1.10252	0.305135	0.427637	0.536043	1.10701	0.836586	0.42338	-0.185534	2.23962	0.627009	NO	0.70383	0.48184	YES	0.971796	0.118923	YES	-1.61261	1.34643226864851e-05	Down	0.630883	0.0390156	Null
576	chr13:58560282-58560381	B2_Mm1aB2_SINE-	no	0.315372	4.73	0.0161222	6.06	4.72845	8.71	5.46124	9.25	-0.284851	-0.258566	3.11152	3.26661	-0.279121	-0.102625	2.09253	2.09953	0.165747	5.09484	NO	-0.271708	3.18907	YES	-0.190873	2.09603	NO	4.9291	6.37695427294913e-13	Up	1.17387	3.13138119526467e-05	Up
577	chr13:94385175-94385274	B2_Mm2_B2_SINE-	no	1.6574	0	1.60719	0	-0.0413069	0	0.824956	0	0.412261	0.0552946	0.556243	0.119103	0.716525	0.716295	0.127937	0.0456765	1.6323	0.391825	NO	0.233778	0.337673	YES	0.71641	0.0868066	YES	-1.24047	0.000586868	Down	0.733498	0.0133595	Null
579	chr14:51422741-51422840	B2_Mm2_B2_SINE+	no	0.648317	0	0.371805	0	2.73918	0	3.35982	0	0.268701	0.34754	1.32625	1.38586	0.29012	-0.192525	0.678565	0.376415	0.510061	3.0495	NO	0.30812	1.35606	YES	0.0487976	0.52749	YES	2.53944	1.57931653151157e-08	Up	0.569243	0.0676133	Null
589	chr14:55512400-55512584	B1_Mur3_SINE_Alu+	yes	2.38413	0	1.66716	0	2.25943	0	2.8618	0	1.21441	-0.210921	0.986897	0.754892	1.60322	0.663735	0.281194	0.214593	2.02564	2.56061	NO	0.501745	0.870894	YES	1.13348	0.247894	NO	0.534972	0.123125	Null	1.25473	7.49004249633542e-06	Up
591	chr14:71113711-71113810	B1_Mus1_Alu_SINE+	no	2.0156	0	1.56757	0	-0.143135	0	-0.484058	0	0.934393	0.488439	-0.117765	-0.752352	0.659619	0.399216	-0.202385	-0.0782783	1.79159	-0.313596	NO	0.711416	-0.435059	YES	0.529418	-0.140332	YES	-2.10518	2.36094156228829e-07	Down	-0.476725	0.13817	Null
592	chr14:73693701-73693800	B2_Mm1t_B2_SINE+	no	1.68742	0	2.02144	0	0.732295	0	1.32101	0	0.708541	0.664701	0.0624693	0.243794	0.681634	0.532129	-0.445459	0.0114664	1.85443	1.02665	NO	0.686621	0.153132	YES	0.606882	-0.216996	YES	-0.827778	0.0130835	Null	0.290389	0.404854	Null
593	chr14:74022510-74022609	B1_Mus2_Alu_SINE-	no	1.32274	0	1.44281	0	0.121028	0	0.279591	0	0.0102848	0.49745	-0.146052	0.41553	0.269165	0.384048	0.145373	0.0894548	1.38278	0.200309	NO	0.253867	0.134739	YES	0.326607	0.117414	YES	-1.18247	0.000370463	Down	0.0900648	0.827139	Null
599	chr15:31156406-31156651	B2_Mm2_SINE_B2+	yes	1.5198	0	1.40065	0	1.34711	0	1.96657	0	0.120915	0.30684	0.34257	0.576893	0.821081	0.0815589	-0.269395	0.131598	1.46022	1.65684	NO	0.213878	0.459732	YES	0.45132	-0.0688984	YES	0.196616	0.577761	Null	0.766073	0.00929942	Null
601	chr15:41621390-41621489	B1_Mus1_Alu_SINE+	no	1.56062	0.1	1.47588	0	1.21894	0.14	2.04423	0.15	0.106543	0.184727	-0.109753	0.0724526	0.521369	0.686787	-0.24704	0.0333427	1.51825	1.63158	NO	0.145635	-0.0186504	YES	0.604078	-0.106849	YES	0.113335	0.765307	Null	0.546641	0.0814093	Null
606	chr15:81295628-81295727	B1_Mus1_Alu_SINE+	no	0.251775	0	0.447624	0	2.38548	0	2.84859	0	-0.322494	0.417963	0.794784	1.04629	-0.110349	0.332299	0.412758	0.641189	0.349699	2.61704	NO	0.0477344	0.920539	YES	0.110975	0.526974	YES	2.26734	6.60149573378108e-08	Up	0.456806	0.158395	Null
609	chr15:99697526-99697625	B3A_B2_SINE+	no	0.203645	0	0.0120425	0	1.95523	0	2.52297	0	0.106682	-0.158194	0.84305	0.99384	0.080228	-0.190818	-0.0774932	0.100703	0.107844	2.2391	NO	-0.0257558	0.918445	YES	-0.0552951	0.0116051	YES	2.13126	2.11920767510616e-07	Up	0.877301	0.00246289	Up
610	chr15:100213624-100213723	ID_B1_B4_SINE-_and_B1_Mur3_Alu_SINE+	no	1.68218	0	1.60716	0	-0.0491553	0	-0.558352	0	0.340147	0.367137	-0.331362	0.0637166	0.489894	0.385396	-0.426876	0.0683466	1.64467	-0.303754	NO	0.353642	-0.133823	YES	0.437645	-0.179265	YES	-1.94842	7.06767699337513e-07	Down	0.129445	0.746362	Null
616	chr16:14131871-14132075	B2_Mm1t_SINE_B2-	yes	1.99675	1.34	2.07955	0.54	-0.790238	0.93	-0.738461	0.84	0.498865	0.494718	-0.759416	-0.887794	0.768526	1.05622	-0.516158	-0.837255	2.03815	-0.76435	NO	0.496792	-0.823605	YES	0.912371	-0.676707	YES	-2.8025	1.08184835925937e-09	Down	0.268681	0.443521	Null
618	chr16:18058411-18058510	B1_Mm_Alu_SINE-	no	0.518347	0	0.284426	0	2.35484	0	2.73557	0	0.461623	-0.493823	0.831045	0.905428	0.650614	-0.273618	-0.120053	0.24459	0.401387	2.5452	NO	-0.0161	0.868236	YES	0.188498	0.0622685	YES	2.14382	1.41444792070463e-07	Up	1.01057	0.000386923	Up
619	chr16:30394020-30394119	B2_Mm2_B2_SINE-	no	0.251775	0	0.72192	0	3.42977	0	4.14244	0	-0.349019	0.222538	2.01236	2.14057	-0.258536	0.107075	1.3211	1.23288	0.486848	3.7861	NO	-0.0632408	2.07646	NO	-0.0757305	1.27699	YES	3.29925	3.87014124364356e-10	Up	0.786984	0.00738027	Null
620	chr16:31205978-31206077	B2_Mm1t_B2_SINE+	no	0.459381	4.68	-0.0664663	7.95	2.5269	11.79	3.09077	12.71	0.303153	-0.34529	1.14285	1.43835	0.16813	-0.277698	0.448034	0.584941	0.196457	2.80884	NO	-0.0210685	1.2906	YES	-0.0547839	0.516487	YES	2.61238	1.28849139055072e-08	Up	0.740399	0.0124002	Null
621	chr16:31399621-31399720	B2_Mm2_B2_SINE+	no	2.5281	0.24	2.09661	0.32	0.605367	2.2	0.696685	1.33	1.0496	0.7532	0.233504	0.139353	1.38279	0.711235	0.569252	0.235142	2.31235	0.651026	NO	0.901402	0.186429	YES	1.04701	0.402197	YES	-1.66132	6.75434558791043e-06	Down	-0.070158	0.870684	Null
622	chr16:38275006-38275105	B2_Mm2_B2_SINE+	no	0.751476	0	0.5579	0	3.32403	0	3.97869	0	0.207692	-0.0870609	1.90312	1.80796	0.467342	0.270352	0.839029	1.00734	0.654688	3.65136	NO	0.0603155	1.85554	YES	0.368847	0.923183	YES	2.99668	1.00378085885593e-09	Up	1.24089	9.56030862137566e-06	Up
629	chr16:84746464-84746699	B1_Mus1_SINE_Alu+	yes	3.36507	0	3.02002	0	-0.0131391	0	-0.380317	0	1.52828	0.999759	-0.0336402	-0.14211	1.95978	1.70393	-0.617871	-0.0696566	3.19254	-0.196728	NO	1.26402	-0.0878749	NO	1.83186	-0.343764	NO	-3.38927	1.13635191554836e-10	Down	0.823727	0.00481379	Up
630	chr16:91770236-91770335	B2_Mm1t_B2_SINE-	no	1.63831	0	1.36818	0	-0.46996	0	-0.603206	0	0.692012	0.424541	-0.812228	-0.752808	0.529168	0.41059	-0.930113	-0.769554	1.50324	-0.536583	NO	0.558277	-0.782518	YES	0.469879	-0.849833	YES	-2.03983	2.3872130382356e-07	Down	-0.0210828	0.969843	Null
639	chr17:24832079-24832178	B1_Mus1_Alu_SINE-	no	0.772739	0	0.639059	0	1.93014	0	2.35609	0	-0.152831	-0.133655	0.57283	0.7121	0.0440272	0.00428963	0.223206	0.24213	0.705899	2.14312	NO	-0.143243	0.642465	YES	0.0241584	0.232668	YES	1.43722	4.88344646820699e-05	Up	0.577198	0.0632586	Null
640	chr17:24863030-24863129	B2_Mm2_B2_SINE-_and_B1_Mur4_Alu_SINE+	no	0.0977491	0	0.488759	0	1.90816	0	2.74738	0	-0.34272	0.328077	0.955401	0.871539	-0.175552	0.441475	0.262862	0.09888	0.293254	2.32777	NO	-0.00732137	0.91347	YES	0.132961	0.180871	YES	2.03452	1.13586559891691e-06	Up	0.872882	0.00260209	Up
642	chr17:30794465-30794672	B3_SINE_B2-	yes	2.7684	0	2.68893	0	1.29181	0	1.65556	0	0.828065	0.829719	0.223383	0.105173	1.1324	1.34867	0.176787	0.281435	2.72867	1.47368	NO	0.828892	0.164278	YES	1.24053	0.229111	NO	-1.25499	0.000224951	Down	0.34681	0.308159	Null
645	chr17:56545262-56545361	B4_B4_SINE+	no	1.64915	0	1.02286	0	-0.760755	0	-0.0946294	0	0.42802	-0.270361	-0.288891	-0.782029	0.727583	-0.0719848	-0.396332	-0.394555	1.336	-0.427692	NO	0.0788299	-0.53546	YES	0.327799	-0.395443	YES	-1.7637	8.90730594185452e-06	Down	0.108952	0.790354	Null
[truncated: 13 more rows]

## Sheet: LINEs
	Locus description			Scores: log2((IP tag counts +30)/(Input tag counts+30))																Mean of scores in biological replicates									LIMMA analysis on POLR3D scores, liver vs hepa			LIMMA analysis on POLR3G/POLR3GL score ratios in liver versus hepa
[truncated: 18 more rows]

[truncated: 2 more sheets: Other rRNA, NA]
