# Supplementary material for: Gene duplication and neofunctionalization: POLR3G and POLR3GL
Source: HighWire-hosted journal article supplement (doi:10.1101/gr.161570.113), 2013-10-09
Supplement: TableS4.xlsx [file TableS4.xlsx]

## Sheet: no change
	Locus description			Mean of scores in biological replicates		LIMMA analysis on POLR3D scores liver vs hepa
Number	Locus position with link (NCBI37/mm9)	Locus annotation	Discussed in Canella et al. 2012 ?	POLR3D Liver mean score (cut off = 1.0782)	POLR3D Hepa 1-6 mean score (cut off = 1.7317)	LogFC POLR3D Hepa 1-6 versus liver	adj.P.Val POLR3D Hepa 1-6 versus liver	POLR3D Up/Down in Hepa 1-6 versus liver
3	chr1:51376031-51376130	NA_1	no	1.4671	1.13327	-0.33383	0.315892	Null
13	chr1:167572402-167572473	n-Tp8|chr1_1022_tRNAPro_CGG-	yes	4.42743	4.87082	0.44339	0.173555	Null
20	chr1:172994295-172994366	n-Te5|chr1_1002_tRNAGlu_CTC-	yes	1.96288	2.55978	0.596905	0.0718752	Null
21	chr1:172994830-172994901	n-Tg20|chr1_1001_tRNAGly_TCC-	yes	1.93466	1.70446	-0.230197	0.497876	Null
22	chr1:172995489-172995560	n-Td3|chr1_1000_tRNAAsp_GTC-	yes	1.68093	2.14094	0.460012	0.145896	Null
25	chr1:173001923-173001994	n-Te8|chr1_999_tRNAGlu_CTC-	yes	2.02172	2.79745	0.775727	0.0228434	Null
26	chr1:173002465-173002536	n-Tg24|chr1_998_tRNAGly_TCC-	yes	2.00507	1.4925	-0.512566	0.112302	Null
30	chr1:173009537-173009608	n-Te7|chr1_996_tRNAGlu_CTC-	yes	2.02712	2.67635	0.649233	0.0523025	Null
31	chr1:173010079-173010150	n-Tg23|chr1_995_tRNAGly_TCC-	yes	2.00507	1.4925	-0.512566	0.112302	Null
35	chr1:173031969-173032051	n-Tl21|chr1_993_tRNALeu_CAG-	yes	4.81834	4.64086	-0.177487	0.60387	Null
39	chr1:173041574-173041646	n-Tv14|chr1_710_tRNAVal_CAC+	yes	3.99358	4.14916	0.155582	0.671963	Null
40	chr1:173073622-173073789	NA_2	no	2.28828	1.33245	-0.955827	0.00551881	Null
60	chr2:122201230-122201301	n-Th4|chr2_1432_tRNAHis_GTG-	yes	4.69469	5.45989	0.765199	0.0257126	Null
62	chr2:122203704-122203775	n-Th5|chr2_586_tRNAHis_GTG+	yes	5.37188	6.28246	0.910583	0.00916078	Null
66	chr2:180926179-180926278	B2_Mm1t_B2_SINE-	no	1.32801	1.31692	-0.0110886	0.980574	Null
82	chr3:90279782-90279853	n-Tm11|chr3_792_tRNAMetInit_CAT-	yes	4.91586	5.76752	0.851655	0.00930743	Null
87	chr3:96136663-96136735	n-Tv18|chr3_284_tRNAVal_CAC+	yes	1.61256	1.80338	0.190819	0.634114	Null
90	chr3:96145079-96145150	n-Tq5|chr3_756_tRNAGln_CTG-	yes	1.15067	1.51057	0.359895	0.302585	Null
92	chr3:96155090-96155160	n-Tg5|chr3_755_tRNAGly_CCC-	yes	1.16294	0.683155	-0.479786	0.16143	Null
95	chr3:96202982-96203053	n-Tq4|chr3_753_tRNAGln_CTG-	yes	2.81348	3.1069	0.293416	0.401236	Null
106	chr3:96283314-96283385	n-Tq3|chr3_297_tRNAGln_CTG+	yes	1.62952	1.66493	0.0354116	0.927791	Null
115	chr3:121995866-121995950	n-Tr22|chr3_628_tRNAArg_TCT_I-	yes	4.26922	4.94729	0.678062	0.0348906	Null
117	chr3:146184477-146184576	B1_Mus2_alu_SINE+	no	1.60427	1.46062	-0.143653	0.68552	Null
130	chr4:128780080-128780179	B2_Mm1t_B2_SINE+	no	1.41991	0.791911	-0.627998	0.0439799	Null
135	chr4:135478326-135478425	B2_Mm2_B2_SINE+	no	1.3148	1.21425	-0.100555	0.782416	Null
143	chr5:31190888-31190960	n-Ta15|chr5_110_tRNAAla_AGC+	yes	5.58056	5.98403	0.403469	0.223942	Null
144	chr5:33205445-33205544	B1_Mus2_Alu_SINE-	no	1.46579	1.0281	-0.43769	0.187496	Null
146	chr5:65926870-65927025	B2_Mm2_SINE_B2+	yes	2.45197	3.04643	0.594462	0.0672065	Null
160	chr5:137775343-137775442	B1_Mus1_Alu_SINE+	no	1.7209	2.06097	0.340069	0.313527	Null
163	chr5:150040577-150040650	n-Tn14|chr5_1043_tRNAAsn_GTT-	yes	4.85784	5.39914	0.541302	0.0954856	Null
172	chr6:47604999-47605093	Rn4.5s|4.5SRNA_scRNA-	no	5.13713	4.40584	-0.731293	0.0370835	Null
173	chr6:47609320-47609414	Rn4.5s|4.5SRNA_scRNA-	no	5.33953	4.48599	-0.853538	0.0142321	Null
174	chr6:47613660-47613754	Rn4.5s|4.5SRNA_scRNA-	no	5.15852	4.42403	-0.734498	0.0364739	Null
175	chr6:47617996-47618090	Rn4.5s|4.5SRNA_scRNA-	no	5.13713	4.40584	-0.731293	0.0370835	Null
176	chr6:47622304-47622398	Rn4.5s|4.5SRNA_scRNA-	no	5.15852	4.42403	-0.734498	0.0364739	Null
177	chr6:47626642-47626736	Rn4.5s|4.5SRNA_scRNA-	no	5.15852	4.42403	-0.734498	0.0364739	Null
178	chr6:47630963-47631057	Rn4.5s|4.5SRNA_scRNA-	no	5.13713	4.40584	-0.731293	0.0370835	Null
179	chr6:47635281-47635375	Rn4.5s|4.5SRNA_scRNA-	no	5.13713	4.40584	-0.731293	0.0370835	Null
180	chr6:47689877-47689970	Rn4.5s|4.5SRNA_scRNA-	no	4.53196	4.45938	-0.0725792	0.853797	Null
181	chr6:47694136-47694230	Rn4.5s|4.5SRNA_scRNA-	no	4.90096	4.29965	-0.601314	0.0901925	Null
182	chr6:47698496-47698590	Rn4.5s|4.5SRNA_scRNA-	no	4.77819	4.30304	-0.475154	0.186137	Null
183	chr6:47702830-47702924	Rn4.5s|4.5SRNA_scRNA-	no	4.7963	4.1623	-0.633998	0.0731141	Null
185	chr6:47713262-47713356	Rn4.5s|4.5SRNA_scRNA-	no	4.7963	4.1623	-0.633998	0.0731141	Null
242	chr6:120876571-120876670	B2_Mm1a_B2_SINE-_and_B1_Mus1_Alu_SINE-	no	1.9005	1.10037	-0.800127	0.0144019	Null
245	chr6:128714147-128714241	Rn4.5s|4.5SRNA_scRNA-	yes	4.70206	4.99932	0.297253	0.424575	Null
246	chr6:128748852-128749049	B4A_SINE_B4-	yes	4.44271	4.40623	-0.0364736	0.923305	Null
251	chr6:128793305-128793400	Rn4.5s|4.5SRNA_scRNA+	yes	4.51751	5.18088	0.663375	0.0599397	Null
264	chr7:65654685-65654756	n-Te17|chr7_337_tRNAGlu_TTC+	yes	4.07735	4.42144	0.344094	0.322719	Null
285	chr8:97227904-97227986	n-Tl16|chr8_1008_tRNALeu_CAG-	yes	5.44329	4.87971	-0.563579	0.104194	Null
316	chr8:126106747-126106868	Rn5S_like|5S_from_RepeatMasker	yes	2.2986	3.10975	0.811147	0.0137109	Null
347	chr9:65049244-65049401	B2_Mm1a_SINE_B2+	yes	2.84181	2.14981	-0.691997	0.035775	Null
349	chr9:66919915-66920014	B2_Mm2_B2_SINE-	no	2.03527	2.30365	0.268382	0.428741	Null
360	chr10:8702849-8702948	B2_Mm2_B2_SINE+	no	1.46052	0.735958	-0.724558	0.0212301	Null
369	chr10:62892224-62892305	n-Ts26|chr10_1095_tRNASer_TGA-	yes	4.5208	5.075	0.554203	0.0777053	Null
373	chr10:79355503-79355602	B2_Mm1a_B2_SINE-	no	1.15685	2.08897	0.932114	0.00652843	Null
378	chr10:79786931-79787030	B1F2_Alu_SINE+_and_B2_Mm1a_B2_SINE+	no	2.48876	3.34126	0.852498	0.0165345	Null
380	chr10:90644157-90644228	n-Tw2|chr10_857_tRNATrp_CCA-	yes	4.23094	5.11927	0.888332	0.00635854	Null
402	chr11:58115679-58115750	n-Te10|chr11_1912_tRNAGlu_CTC-	yes	5.18993	5.71068	0.52075	0.0996159	Null
404	chr11:61221418-61221489	n-Tw5|chr11_1880_tRNATrp_CCA-	yes	4.96097	5.46558	0.504612	0.105752	Null
405	chr11:62559517-62559588	n-Tw8|chr11_1849_tRNATrp_CCA-	yes	1.23874	0.313852	-0.924893	0.00775056	Null
408	chr11:68850979-68851060	n-Ts4|chr11_394_tRNASer_AGA+	yes	4.86059	5.77253	0.911937	0.00560424	Null
410	chr11:68853887-68853958	n-Tp9|chr11_396_tRNAPro_CGG+	yes	4.02202	3.08482	-0.937203	0.00708455	Null
416	chr11:68876544-68876625	n-Ts17|chr11_1821_tRNASer_GCT-	yes	5.86986	6.46011	0.590254	0.0625529	Null
419	chr11:68923967-68924040	n-Tt5|chr11_399_tRNAThr_AGT+	yes	3.89451	3.47142	-0.423089	0.190623	Null
420	chr11:68924421-68924502	n-Ts14|chr11_400_tRNASer_CGA+	yes	3.72909	3.28213	-0.446959	0.183359	Null
421	chr11:68932296-68932366	n-Tg13|chr11_1819_tRNAGly_GCC-	yes	4.7977	5.69947	0.901772	0.00607289	Null
433	chr11:87236521-87236620	NA_18	no	1.53185	1.6787	0.146851	0.675139	Null
435	chr11:95720486-95720557	n-Tq16|chr11_1493_tRNAGln_TTG-	yes	4.67661	5.45227	0.775657	0.0179826	Null
441	chr11:97849560-97849631	n-Tc55|chr11_1433_tRNACys_GCA-	yes	4.8091	5.51059	0.701498	0.0366207	Null
443	chr11:97855307-97855406	B2_Mm2_B2_SINE+	no	2.83409	3.47075	0.636663	0.0504078	Null
446	chr11:101488967-101489066	NA_20	no	1.43263	1.51887	0.0862443	0.811394	Null
447	chr11:101519634-101519733	NA_21	no	1.0923	1.8493	0.757002	0.0183914	Null
450	chr11:106874180-106874252	n-Tr7|chr11_945_tRNAArg_CCG+	yes	5.05307	5.22471	0.171632	0.613864	Null
462	chr12:70260298-70260551	Rn7sl|7SLRNA_srpRNA+	yes	5.19182	5.822	0.630183	0.0500671	Null
463	chr12:70462167-70462478	Rn7sl|7SLRNA_srpRNA-	yes	5.34367	5.60136	0.257694	0.45875	Null
470	chr13:21252654-21252725	n-Te11|chr13_1001_tRNAGlu_CTC-	yes	4.87536	5.50806	0.632708	0.0571175	Null
471	chr13:21253274-21253346	n-Tf4|chr13_60_tRNAPhe_GAA+	yes	4.13519	4.64922	0.51403	0.120091	Null
475	chr13:21261905-21261986	n-Tl7|chr13_62_tRNALeu_AAG+	yes	4.85482	5.54827	0.693452	0.0332355	Null
476	chr13:21262075-21262156	n-Tl5|chr13_63_tRNALeu_AAG+	yes	4.76865	5.55886	0.790212	0.0151813	Null
477	chr13:21264220-21264291	n-Tq7|chr13_64_tRNAGln_CTG+	yes	4.33424	4.82789	0.493654	0.125567	Null
479	chr13:21292073-21292177	n-Tl10|chr13_65_tRNALeu_CAA_I+	yes	5.36587	5.14832	-0.217544	0.555345	Null
481	chr13:21314455-21314526	n-Ta16|chr13_66_tRNAAla_AGC+	yes	4.6362	4.67978	0.0435755	0.910138	Null
484	chr13:21334439-21334510	n-Ta18|chr13_69_tRNAAla_AGC+	yes	1.24969	1.68884	0.439144	0.235675	Null
493	chr13:21418586-21418658	n-Tm13|chr13_994_tRNAMet_CAT-	yes	3.99278	4.39489	0.402111	0.218845	Null
495	chr13:21802449-21802519	n-Tg28|chr13_77_tRNAGly_GCC+	yes	4.48312	4.29611	-0.187006	0.643017	Null
496	chr13:21802863-21802934	n-Tm7|chr13_78_tRNAMetInit_CAT+	yes	4.94114	4.76039	-0.180753	0.645985	Null
504	chr13:21998980-21999051	n-Tm2|chr13_82_tRNAMet_CAT+	yes	1.2403	0.53762	-0.702677	0.0875378	Null
506	chr13:22003182-22003253	n-Td11|chr13_84_tRNAAsp_GTC+	yes	1.36645	0.890688	-0.475763	0.141999	Null
510	chr13:22012069-22012140	n-Tq10|chr13_87_tRNAGln_CTG+	yes	3.2243	4.01373	0.789425	0.0198972	Null
511	chr13:22016804-22016885	n-Ts25|chr13_984_tRNASer_TGA-	yes	1.66122	1.68918	0.0279604	0.947131	Null
515	chr13:22027366-22027437	n-Td13|chr13_981_tRNAAsp_GTC-	yes	2.38655	2.4564	0.0698501	0.876234	Null
517	chr13:22032188-22032259	n-Td12|chr13_979_tRNAAsp_GTC-	yes	4.14627	4.78486	0.638584	0.0692112	Null
519	chr13:22063657-22063729	n-Tk22|chr13_89_tRNALys_TTT+	yes	1.66504	0.802024	-0.863015	0.00658267	Null
521	chr13:22086059-22086140	n-Ts22|chr13_976_tRNASer_GCT-	yes	2.03472	1.40545	-0.629277	0.0478321	Null
525	chr13:22114288-22114369	n-Ts12|chr13_972_tRNASer_CGA-	yes	4.5144	5.04366	0.529265	0.0996004	Null
526	chr13:22118417-22118489	n-Tv16|chr13_91_tRNAVal_CAC+	yes	3.53721	4.3497	0.812491	0.0152147	Null
529	chr13:22142555-22142636	n-Ts19|chr13_970_tRNASer_GCT-	yes	4.28623	4.85308	0.566853	0.0715518	Null
536	chr13:23399498-23399570	n-Tv19|chr13_98_tRNAVal_CAC+	yes	1.72625	0.911807	-0.814441	0.0197765	Null
540	chr13:23492664-23492736	n-Ta12|chr13_966_tRNAAla_AGC-	yes	2.16457	2.26987	0.1053	0.768717	Null
547	chr13:23518964-23519049	n-Ty5|chr13_960_tRNATyr_GTA_I-	yes	1.93019	2.20986	0.279671	0.422379	Null
551	chr13:23528209-23528281	n-Tk11|chr13_103_tRNALys_CTT+	yes	4.20371	4.56302	0.359307	0.290776	Null
553	chr13:23529978-23530051	n-Ti8|chr13_956_tRNAIle_AAT-	yes	5.46143	6.04553	0.5841	0.0636955	Null
554	chr13:23530566-23530637	n-Ta29|chr13_955_tRNAAla_CGC-	yes	4.0468	3.98463	-0.0621769	0.887052	Null
565	chr13:23595849-23595921	n-Tr17|chr13_949_tRNAArg_TCG-	yes	4.05827	4.33124	0.272963	0.408613	Null
567	chr13:23609072-23609142	n-Tg27|chr13_110_tRNAGly_GCC+	yes	4.58676	4.1338	-0.452966	0.167887	Null
568	chr13:23609561-23609632	n-Tm6|chr13_111_tRNAMetInit_CAT+	yes	4.81638	4.82453	0.00814497	0.984961	Null
569	chr13:23610015-23610096	n-Ts24|chr13_112_tRNASer_TGA+	yes	4.03277	3.8279	-0.204866	0.556013	Null
570	chr13:23610919-23610990	n-Tq14|chr13_113_tRNAGln_TTG+	yes	4.97391	5.62872	0.654814	0.0441177	Null
572	chr13:23613739-23613820	n-Ts18|chr13_115_tRNASer_GCT+	yes	5.25092	5.00375	-0.247174	0.469921	Null
574	chr13:23622217-23622288	n-Tm9|chr13_947_tRNAMetInit_CAT-	yes	4.89486	5.57135	0.676497	0.0442229	Null
581	chr14:51683558-51683639	n-Tl8|chr14_188_tRNALeu_AAG+	yes	5.6468	6.3484	0.701594	0.0292349	Null
585	chr14:51708325-51708397	n-Tt15|chr14_190_tRNAThr_TGT+	yes	4.54406	5.18839	0.644327	0.0601961	Null
586	chr14:51709164-51709253	n-Ty10|chr14_191_tRNATyr_GTA_I+	yes	5.25304	5.82361	0.570576	0.0777053	Null
589	chr14:55512400-55512584	B1_Mur3_SINE_Alu+	yes	2.02564	2.56061	0.534972	0.123125	Null
592	chr14:73693701-73693800	B2_Mm1t_B2_SINE+	no	1.85443	1.02665	-0.827778	0.0130835	Null
599	chr15:31156406-31156651	B2_Mm2_SINE_B2+	yes	1.46022	1.65684	0.196616	0.577761	Null
601	chr15:41621390-41621489	B1_Mus1_Alu_SINE+	no	1.51825	1.63158	0.113335	0.765307	Null
602	chr15:57807538-57807610	n-Tm16|chr15_913_tRNAMet_CAT-	yes	4.80624	5.28528	0.479038	0.136153	Null
648	chr17:71948611-71948682	n-Tc52|chr17_458_tRNACys_GCA+	yes	2.95113	3.16637	0.215232	0.532214	Null
653	chr18:60961733-60961832	RLTR30_ERV1_LTR+_and_B2_Mm1a_B2_SINE+	no	1.82023	1.39797	-0.422263	0.217521	Null
657	chr19:3831713-3831812	B2_Mm1a_B2_SINE-	no	2.92256	2.05124	-0.871323	0.00928506	Null
673	chr19:32703343-32703442	B2_Mm2_B2_SINE+	no	1.6805	1.24119	-0.439311	0.218887	Null
675	chr19:57478665-57478829	B2_Mm1a_SINE_B2-	yes	2.61903	2.56959	-0.0494406	0.897795	Null
Table S4. All loci shown in Table S3 (except for those labeled in red in Column A of Table S3) are shown, separated in different sheet according to whether: they show no significant score change in liver compared to Hepa 1-6 cells (no change); they show higher scores in Hepa 1-6 cells as compared to liver cells (Higher in Hepa 1-6); they show higher score in liver cells as compared to Hepa 1-6 ce…

## Sheet: Higher in Hepa 1-6
	Locus description			Mean of scores in biological replicates		LIMMA analysis on POLR3D scores liver vs hepa
Number	Locus position with link (NCBI37/mm9)	Locus annotation	Discussed in Canella et al. 2012 ?	POLR3D Liver mean score (cut off = 1.0782)	POLR3D Hepa 1-6 mean score (cut off = 1.7317)	LogFC POLR3D Hepa 1-6 versus liver	adj.P.Val POLR3D Hepa 1-6 versus liver	POLR3D Up/Down in Hepa 1-6 versus liver
2	chr1:34491657-34491728	n-Te21|chr1_1547_tRNAGlu_TTC-	yes	4.44649	5.98438	1.53789	2.22859e-05	Up
4	chr1:74863321-74863391	n-Tg11|chr1_1392_tRNAGly_GCC-	yes	2.4346	3.91792	1.48333	5.34815e-05	Up
8	chr1:130008960-130009059	B2_Mm2_B2_SINE+	no	1.92722	3.74242	1.8152	3.45312e-06	Up
9	chr1:134930539-134930611	n-Tk26|chr1_485_tRNALys_TTT+	yes	4.11158	5.93695	1.82537	5.94743e-06	Up
10	chr1:134930904-134930976	n-Tk25|chr1_1184_tRNALys_TTT-	yes	2.7328	5.91783	3.18502	4.20056e-10	Up
12	chr1:167571765-167571836	n-Tp2|chr1_672_tRNAPro_AGG+	yes	4.39646	5.76611	1.36965	7.46604e-05	Up
15	chr1:172964073-172964146	n-Tn6|chr1_1006_tRNAAsn_GTT-	yes	5.09209	6.53975	1.44766	3.59058e-05	Up
16	chr1:172967160-172967231	n-Td4|chr1_1005_tRNAAsp_GTC-	yes	4.48374	6.59775	2.11401	2.38721e-07	Up
17	chr1:172968128-172968199	n-Tg21|chr1_1004_tRNAGly_TCC-	yes	4.69238	6.00523	1.31284	0.000256528	Up
18	chr1:172968745-172968827	n-Tl15|chr1_698_tRNALeu_CAG+	yes	5.26955	6.75103	1.48148	6.1126e-05	Up
24	chr1:172996762-172996832	n-Tg17|chr1_702_tRNAGly_GCC+	yes	2.06424	4.71948	2.65525	7.90809e-09	Up
29	chr1:173004433-173004503	n-Tg18|chr1_704_tRNAGly_GCC+	yes	1.73265	4.45361	2.72096	7.90809e-09	Up
34	chr1:173012007-173012077	n-Tg19|chr1_706_tRNAGly_GCC+	yes	1.67229	4.50899	2.8367	4.81664e-09	Up
36	chr1:173032502-173032573	n-Td5|chr1_707_tRNAAsp_GTC+	yes	3.61365	5.34523	1.73158	4.74848e-06	Up
37	chr1:173032887-173032958	n-Tg22|chr1_708_tRNAGly_TCC+	yes	4.89958	6.18857	1.28899	0.000184958	Up
38	chr1:173033174-173033245	n-Te6|chr1_709_tRNAGlu_CTC+	yes	4.87019	6.21589	1.3457	0.000110729	Up
47	chr2:18508671-18508744	n-Tn9|chr2_1947_tRNAAsn_GTT-	yes	4.72739	6.54044	1.81305	2.55869e-06	Up
49	chr2:27395325-27395450	Rnu6atac|U6atac-	yes	4.60046	6.89359	2.29313	6.01891e-08	Up
50	chr2:57034489-57034560	n-Ta27|chr2_263_tRNAAla_CGC+	yes	4.8814	6.56173	1.68033	2.23696e-05	Up
51	chr2:57034805-57034875	n-Tg29|chr2_1747_tRNAGly_GCC-	yes	4.47202	7.02296	2.55094	3.02483e-08	Up
54	chr2:91078023-91078122	B2_Mm1a_B2_SINE+	no	1.54678	3.05249	1.50571	5.30623e-05	Up
57	chr2:118872486-118872567	n-Ts21|chr2_1509_tRNASer_GCT-	yes	5.37461	6.39551	1.0209	0.0022198	Up
59	chr2:122059558-122059657	B1_Mus2_Alu_SINE-	no	1.20525	3.80569	2.60044	7.11536e-09	Up
61	chr2:122203099-122203170	n-Th3|chr2_1431_tRNAHis_GTG-	yes	5.07308	6.21571	1.14263	0.000900486	Up
70	chr3:19527959-19528031	n-Tr3|chr3_1040_tRNAArg_ACG-	yes	4.28338	5.41093	1.12755	0.00103605	Up
71	chr3:19528355-19528447	n-Ty1|chr3_27_tRNATyr_GTA_I+	yes	4.45853	5.5857	1.12717	0.000895784	Up
72	chr3:19528782-19528870	n-Ty2|chr3_28_tRNATyr_GTA_I+	yes	5.18917	6.52448	1.3353	0.000117757	Up
73	chr3:19528995-19529067	n-Ta14|chr3_29_tRNAAla_AGC+	yes	5.30478	6.60828	1.3035	0.000149497	Up
76	chr3:30500192-30500264	n-Tv8|chr3_48_tRNAVal_AAC+	yes	5.27468	6.62763	1.35295	0.000129601	Up
77	chr3:51162276-51162347	n-Tp17|chr3_92_tRNAPro_TGG+	yes	2.57199	4.99597	2.42398	1.92285e-08	Up
78	chr3:51163329-51163400	n-Tp5|chr3_93_tRNAPro_AGG+	yes	2.97059	5.3434	2.37281	6.01891e-08	Up
81	chr3:84032933-84033003	n-Tg14|chr3_878_tRNAGly_GCC-	yes	1.27789	4.09136	2.81347	7.68203e-09	Up
98	chr3:96227956-96228026	n-Tg6|chr3_752_tRNAGly_CCC-	yes	1.37043	4.72266	3.35223	2.01676e-10	Up
99	chr3:96232158-96232230	n-Tk15|chr3_292_tRNALys_CTT+	yes	1.66205	6.21359	4.55154	4.38687e-12	Up
107	chr3:96301704-96301777	n-Tn12|chr3_298_tRNAAsn_GTT+	yes	4.44366	6.91112	2.46746	2.23366e-08	Up
108	chr3:96303435-96303507	n-Tk16|chr3_748_tRNALys_CTT-	yes	4.53888	5.9553	1.41642	6.82262e-05	Up
109	chr3:96304289-96304360	n-Th8|chr3_747_tRNAHis_GTG-	yes	3.78829	5.8231	2.0348	3.61297e-07	Up
110	chr3:96304932-96305003	n-Tg26|chr3_746_tRNAGly_TCC-	yes	5.47157	7.06586	1.59429	1.35184e-05	Up
111	chr3:96305370-96305441	n-Te13|chr3_745_tRNAGlu_CTC-	yes	4.93099	6.00371	1.07272	0.00272256	Up
112	chr3:96962008-96962079	n-Te12|chr3_303_tRNAGlu_CTC+	yes	3.76459	6.32765	2.56306	1.14139e-08	Up
118	chr4:10801211-10801292	n-Ts9|chr4_16_tRNASer_AGA+	yes	4.43777	5.74696	1.30919	0.000167322	Up
119	chr4:11181665-11181764	BC1_Mm_scRNA+	no	1.27315	3.16459	1.89144	3.33048e-06	Up
126	chr4:43505660-43505930	Rmrp|RNase_MRP-	yes	4.50236	6.03069	1.52833	1.72889e-05	Up
142	chr5:31190456-31190544	n-Ty9|chr5_109_tRNATyr_GTA_I+	yes	4.99807	6.70047	1.7024	6.15012e-06	Up
153	chr5:125884620-125884691	n-Ta39|chr5_1317_tRNAAla_TGC-	yes	5.22594	6.36944	1.1435	0.00135075	Up
154	chr5:125885977-125886048	n-Td15|chr5_1316_tRNAAsp_GTC-	yes	3.36704	5.09451	1.72747	1.50038e-05	Up
155	chr5:125886425-125886497	n-Tf7|chr5_1315_tRNAPhe_GAA-	yes	4.8669	6.34415	1.47725	2.80655e-05	Up
156	chr5:125889386-125889457	n-Td14|chr5_1314_tRNAAsp_GTC-	yes	5.31422	7.03321	1.71899	3.77123e-06	Up
157	chr5:125889842-125889913	n-Ta34|chr5_702_tRNAAla_TGC+	yes	4.95903	5.96685	1.00782	0.00263662	Up
166	chr6:29338824-29338895	n-Tp6|chr6_46_tRNAPro_AGG+	yes	2.89212	5.11347	2.22134	9.61964e-08	Up
170	chr6:38483931-38484003	n-Tr10|chr6_107_tRNAArg_CCT+	yes	4.80053	6.02568	1.22516	0.000440503	Up
171	chr6:47600760-47600854	Rn4.5s|4.5SRNA_scRNA-	no	3.45491	4.67012	1.21521	0.000400508	Up
188	chr6:47731623-47731724	Rny3|Y3_RNA+	yes	4.0084	7.15766	3.14926	8.25723e-10	Up
189	chr6:47738068-47738179	Rny1|Y1_RNA-	yes	3.16838	6.31107	3.14269	4.20056e-10	Up
190	chr6:47928996-47929067	n-Tc57|chr6_157_tRNACys_GCA+	yes	4.95194	5.97382	1.02188	0.00253807	Up
241	chr6:86353887-86353957	n-Tg8|chr6_317_tRNAGly_CCC+	yes	4.57743	5.69984	1.12242	0.000900486	Up
243	chr6:128710011-128710362	B4A_SINE_B4-	yes	4.19904	5.6848	1.48576	3.51053e-05	Up
249	chr6:128788477-128788563	Rn4.5s|4.5SRNA_scRNA+	yes	4.63913	5.64004	1.00092	0.00378227	Up
250	chr6:128788924-128789196	B4A_SINE_B4+	yes	4.41747	5.35495	0.937476	0.00384819	Up
255	chr7:19886593-19886678	n-Ts2|chr7_86_tRNASeC(e)_TCA+	yes	4.10614	6.93955	2.83341	2.18202e-09	Up
258	chr7:29158018-29158112	n-Ti16|chr7_156_tRNAIle_TAT_I+	yes	4.4831	6.18698	1.70388	7.20218e-06	Up
259	chr7:29579007-29579079	n-Tk24|chr7_1276_tRNALys_TTT-	yes	1.51741	4.33865	2.82125	2.35279e-09	Up
260	chr7:36019789-36019862	n-Tt9|chr7_1213_tRNAThr_AGT-	yes	4.15585	5.37206	1.21621	0.000325704	Up
265	chr7:86611305-86611377	n-Tr19|chr7_387_tRNAArg_TCG+	yes	4.80923	6.27063	1.46141	4.86154e-05	Up
266	chr7:105963925-105963996	n-Tp18|chr7_441_tRNAPro_TGG+	yes	4.67304	6.17382	1.50078	4.22987e-05	Up
267	chr7:105964186-105964257	n-Tp7|chr7_977_tRNAPro_AGG-	yes	3.93762	5.76773	1.83011	5.06418e-06	Up
270	chr7:127978993-127979074	n-Tl27|chr7_861_tRNALeu_TAG-	yes	4.40983	6.04871	1.63888	1.22374e-05	Up
271	chr7:127986097-127986293	B1_Mus1_SINE_Alu-	yes	2.35458	4.09545	1.74086	5.44517e-06	Up
272	chr7:128061031-128061112	n-Tl4|chr7_559_tRNALeu_AAG+	yes	3.81809	5.67223	1.85415	1.84292e-06	Up
273	chr7:128062206-128062333	MIR_SINE_MIR-	yes	5.20913	6.86334	1.65421	2.02284e-05	Up
275	chr7:133786811-133786910	B2_Mm1a_B2_SINE-	no	1.8279	3.63144	1.80354	4.83257e-06	Up
283	chr8:87404850-87404949	B2_Mm2_B2_SINE-	no	1.69828	3.39425	1.69598	1.27565e-05	Up
284	chr8:97227531-97227613	n-Tl17|chr8_414_tRNALeu_CAG+	yes	4.73693	6.04676	1.30983	0.000334483	Up
288	chr8:113522107-113522266	B2_Mm1t_SINE_B2+	yes	2.5934	3.73517	1.14177	0.000943839	Up
289	chr8:113586461-113586531	n-Tg10|chr8_560_tRNAGly_GCC+	yes	3.80054	5.55553	1.75499	8.04473e-06	Up
290	chr8:124103129-124103201	n-Tm17|chr8_783_tRNAMet_CAT-	yes	4.9517	6.27891	1.32721	0.00016508	Up
291	chr8:126062686-126062804	Rn5S|5S_rRNA	yes	1.81277	5.01003	3.19726	2.19483e-10	Up
293	chr8:126066078-126066196	Rn5S|5S_rRNA	yes	1.13108	4.81123	3.68015	2.41828e-11	Up
294	chr8:126067773-126067891	Rn5S|5S_rRNA	yes	2.21978	5.11288	2.89311	8.61433e-10	Up
295	chr8:126069478-126069596	Rn5S|5S_rRNA	yes	2.2574	5.47306	3.21566	1.7457e-10	Up
296	chr8:126071165-126071283	Rn5S|5S_rRNA	yes	2.18572	5.31739	3.13167	2.51713e-10	Up
297	chr8:126072856-126072974	Rn5S|5S_rRNA	yes	1.98123	4.62338	2.64216	3.64769e-09	Up
298	chr8:126074567-126074685	Rn5S|5S_rRNA	yes	2.12974	5.36613	3.23639	1.62041e-10	Up
299	chr8:126076264-126076382	Rn5S|5S_rRNA	yes	2.12974	5.36613	3.23639	1.62041e-10	Up
300	chr8:126079663-126079781	Rn5S|5S_rRNA	yes	2.16562	5.21936	3.05375	3.96851e-10	Up
301	chr8:126081390-126081508	Rn5S|5S_rRNA	yes	2.17809	5.24297	3.06488	3.96851e-10	Up
302	chr8:126083101-126083219	Rn5S|5S_rRNA	yes	1.921	3.98886	2.06786	3.45935e-07	Up
303	chr8:126084788-126084906	Rn5S|5S_rRNA	yes	2.12974	5.36613	3.23639	1.62041e-10	Up
306	chr8:126089866-126089987	Rn5S_like|5S_from_RepeatMasker	yes	1.70092	4.48779	2.78687	1.45926e-09	Up
307	chr8:126091537-126091655	Rn5S|5S_rRNA	yes	2.21978	5.11288	2.89311	8.61433e-10	Up
308	chr8:126093228-126093346	Rn5S|5S_rRNA	yes	2.02745	4.47459	2.44715	1.29532e-08	Up
310	chr8:126096610-126096728	Rn5S|5S_rRNA	yes	2.22631	3.87157	1.64526	1.0248e-05	Up
311	chr8:126098297-126098415	Rn5S|5S_rRNA	yes	2.16562	5.21936	3.05375	3.96851e-10	Up
312	chr8:126099976-126100094	Rn5S|5S_rRNA	yes	2.24332	5.49064	3.24732	1.62041e-10	Up
313	chr8:126101655-126101773	Rn5S|5S_rRNA	yes	2.17809	5.24297	3.06488	3.96851e-10	Up
314	chr8:126103350-126103468	Rn5S|5S_rRNA	yes	1.95961	4.73744	2.77783	1.72764e-09	Up
315	chr8:126105055-126105173	Rn5S|5S_rRNA	yes	2.17239	4.53276	2.36037	4.23481e-08	Up
318	chr8:126110142-126110260	Rn5S|5S_rRNA	yes	2.26297	5.13748	2.8745	9.07837e-10	Up
320	chr8:126113554-126113672	Rn5S|5S_rRNA	yes	2.20973	4.81872	2.60899	4.58447e-09	Up
322	chr8:126116968-126117089	Rn5S_like|5S_from_RepeatMasker	yes	2.1632	5.21455	3.05135	3.96851e-10	Up
323	chr8:126118654-126118772	Rn5S|5S_rRNA	yes	2.16562	5.21936	3.05375	3.96851e-10	Up
324	chr8:126120357-126120475	Rn5S|5S_rRNA	yes	2.12974	5.36613	3.23639	1.62041e-10	Up
325	chr8:126122055-126122176	Rn5S_like|5S_from_RepeatMasker	yes	2.1782	5.03788	2.85968	1.05273e-09	Up
326	chr8:126123761-126123879	Rn5S|5S_rRNA	yes	2.20109	4.37028	2.1692	1.38157e-07	Up
327	chr8:126125469-126125580	Rn5S_like|5S_from_RepeatMasker	yes	1.35906	4.28057	2.92151	8.25723e-10	Up
328	chr8:126127147-126127265	Rn5S|5S_rRNA	yes	2.18686	5.41036	3.2235	1.69792e-10	Up
329	chr8:126128848-126128966	Rn5S|5S_rRNA	yes	2.12974	5.36613	3.23639	1.62041e-10	Up
330	chr8:126130510-126130631	Rn5S_like|5S_from_RepeatMasker	yes	2.1817	5.30503	3.12333	2.59125e-10	Up
331	chr8:126132220-126132338	Rn5S|5S_rRNA	yes	2.12974	5.36613	3.23639	1.62041e-10	Up
332	chr8:126133917-126134035	Rn5S|5S_rRNA	yes	2.0708	4.24408	2.17329	9.93269e-08	Up
333	chr8:126135615-126135733	Rn5S|5S_rRNA	yes	2.21978	5.11288	2.89311	8.61433e-10	Up
334	chr8:126137314-126137432	Rn5S|5S_rRNA	yes	2.22863	5.34998	3.12135	2.51713e-10	Up
335	chr8:126138996-126139117	Rn5S_like|5S_from_RepeatMasker	yes	2.1632	5.21455	3.05135	3.96851e-10	Up
336	chr8:126140710-126140828	Rn5S|5S_rRNA	yes	2.1792	5.24158	3.06238	3.79137e-10	Up
337	chr8:126142433-126142554	Rn5S_like|5S_from_RepeatMasker	yes	2.1632	5.21455	3.05135	3.96851e-10	Up
338	chr8:126144138-126144259	Rn5S_like|5S_from_RepeatMasker	yes	1.81131	5.00499	3.19368	2.19612e-10	Up
339	chr8:126145828-126145946	Rn5S|5S_rRNA	yes	2.0701	3.86944	1.79934	1.80102e-06	Up
340	chr8:126147537-126147645	Rn5S|5S_rRNA	yes	1.36005	4.28222	2.92217	8.25723e-10	Up
341	chr8:126149708-126149807	B2_Mm2_B2_SINE-	no	1.59982	2.79405	1.19424	0.000379459	Up
345	chr9:62981090-62981196	Rnu6|U6+	yes	2.23413	6.43738	4.20325	9.45228e-12	Up
346	chr9:64585853-64585924	n-Tq9|chr9_342_tRNAGln_CTG+	yes	5.23254	6.90373	1.6712	9.86296e-06	Up
351	chr9:78023110-78023440	Rn7sk|7SK-	yes	4.57941	6.36483	1.78542	2.50926e-06	Up
352	chr9:90021347-90021419	n-Tk18|chr9_1035_tRNALys_CTT-	yes	4.5626	5.89983	1.33723	0.000178437	Up
357	chr9:109833765-109833864	B1_Mm_Alu_SINE-	no	1.1856	3.72331	2.53771	1.64852e-08	Up
358	chr9:123438543-123438615	n-Tr2|chr9_783_tRNAArg_ACG-	yes	4.83382	6.10141	1.26759	0.000197201	Up
361	chr10:12642369-12642451	n-Tl25|chr10_1316_tRNALeu_TAA-	yes	4.26699	5.47618	1.2092	0.000355676	Up
364	chr10:30530946-30531017	n-Te9|chr10_81_tRNAGlu_CTC+	yes	4.8484	5.87	1.0216	0.00298583	Up
366	chr10:62255334-62255433	B1_Mus1_Alu_SINE+	no	1.11756	2.95779	1.84024	2.14855e-06	Up
374	chr10:79371940-79372046	Rnu6|U6+	yes	3.65122	5.85727	2.20605	1.15281e-06	Up
375	chr10:79448251-79448357	Rnu6|U6+	yes	1.91287	5.55102	3.63815	5.66302e-11	Up
376	chr10:79711709-79711781	n-Tf3|chr10_961_tRNAPhe_GAA-	yes	5.19747	6.99748	1.80001	6.39157e-06	Up
377	chr10:79711904-79711977	n-Tn7|chr10_381_tRNAAsn_GTT+	yes	4.87414	5.84464	0.970499	0.00424315	Up
381	chr10:90644842-90644913	n-Td16|chr10_856_tRNAAsp_GTC-	yes	5.02051	6.07322	1.05271	0.00458477	Up
382	chr10:92915723-92915794	n-Td8|chr10_851_tRNAAsp_GTC-	yes	4.35106	5.41747	1.0664	0.00167209	Up
387	chr10:127895520-127895601	n-Ts13|chr10_688_tRNASer_CGA-	yes	4.60567	5.74378	1.13811	0.000586813	Up
389	chr11:48632044-48632116	n-Tv15|chr11_204_tRNAVal_CAC+	yes	4.61331	6.5614	1.94809	6.81246e-07	Up
390	chr11:48637230-48637303	n-Tg1|chr11_205_tRNAGly_ACC+	yes	3.81173	5.59589	1.78416	5.70776e-06	Up
391	chr11:48647385-48647457	n-Tk10|chr11_2023_tRNALys_CTT-	yes	4.99608	6.45861	1.46253	5.31365e-05	Up
392	chr11:48647931-48648002	n-Ta38|chr11_2022_tRNAAla_TGC-	yes	5.49325	6.46333	0.970081	0.00287873	Up
393	chr11:48667121-48667193	n-Tt16|chr11_206_tRNAThr_TGT+	yes	5.22989	6.24489	1.015	0.00184008	Up
394	chr11:48669782-48669853	n-Tp14|chr11_207_tRNAPro_TGG+	yes	4.38492	6.77736	2.39244	6.01891e-08	Up
395	chr11:48670139-48670211	n-Tv7|chr11_208_tRNAVal_AAC+	yes	4.80101	6.92083	2.11982	1.98087e-07	Up
396	chr11:48670476-48670557	n-Tl6|chr11_2021_tRNALeu_AAG-	yes	3.39717	5.97265	2.57547	1.14283e-08	Up
397	chr11:48676608-48676707	B2_Mm2_B2_SINE+	no	1.0899	3.55485	2.46495	1.92285e-08	Up
400	chr11:49998672-49998771	B2_Mm2_B2_SINE+	no	1.2885	5.14548	3.85698	2.31343e-11	Up
407	chr11:68850505-68850578	n-Ti5|chr11_393_tRNAIle_AAT+	yes	4.71818	6.03566	1.31748	0.000284177	Up
409	chr11:68851355-68851428	n-Tt8|chr11_395_tRNAThr_AGT+	yes	4.78601	6.93647	2.15046	2.31428e-07	Up
411	chr11:68854486-68854557	n-Td9|chr11_397_tRNAAsp_GTC+	yes	5.81033	6.88316	1.07284	0.00121311	Up
412	chr11:68854780-68854851	n-Tg25|chr11_1824_tRNAGly_TCC-	yes	5.1622	6.6838	1.52161	2.26792e-05	Up
413	chr11:68855328-68855399	n-Tw7|chr11_398_tRNATrp_CCA+	yes	4.49468	6.47496	1.98027	4.28278e-07	Up
414	chr11:68875822-68875895	n-Ti4|chr11_1823_tRNAIle_AAT-	yes	5.00008	6.76446	1.76438	5.44517e-06	Up
415	chr11:68876246-68876319	n-Tt7|chr11_1822_tRNAThr_AGT-	yes	5.52127	6.84133	1.32006	0.000257385	Up
417	chr11:68876997-68877068	n-Tw6|chr11_1820_tRNATrp_CCA-	yes	3.39792	4.65103	1.25311	0.000334483	Up
418	chr11:68889367-68889466	B2_Mm1t_B2_SINE-_and_B1_Mur3_alu_SINE-	no	1.362	4.18679	2.8248	8.89799e-09	Up
422	chr11:68936984-68937070	n-Tr25|chr11_1818_tRNAArg_TCT_I-	yes	3.38796	5.23899	1.85103	2.22033e-06	Up
423	chr11:68937743-68937824	n-Tl29|chr11_401_tRNALeu_TAG+	yes	5.29567	6.30755	1.01188	0.00281291	Up
424	chr11:68938109-68938180	n-Tq6|chr11_1817_tRNAGln_CTG-	yes	3.83449	7.38258	3.54809	1.25135e-10	Up
425	chr11:68938678-68938750	n-Tk27|chr11_1816_tRNALys_TTT-	yes	5.0188	6.67648	1.65768	7.46802e-06	Up
428	chr11:75160470-75160569	B2_Mm1a_B2_SINE+	no	1.15028	2.23997	1.08969	0.00259715	Up
431	chr11:79518152-79518223	n-Tt12|chr11_550_tRNAThr_CGT+	yes	4.24352	5.31582	1.0723	0.00158899	Up
436	chr11:97563763-97563836	n-Tn8|chr11_1446_tRNAAsn_GTT-	yes	3.86119	5.20404	1.34285	9.77796e-05	Up
437	chr11:97631143-97631214	n-Tc18|chr11_1444_tRNACys_GCA-	yes	1.86859	4.91061	3.04202	8.25723e-10	Up
439	chr11:97658386-97658457	n-Tc56|chr11_791_tRNACys_GCA+	yes	4.75879	6.42075	1.66197	7.05788e-06	Up
440	chr11:97660220-97660291	n-Tc51|chr11_1442_tRNACys_GCA-	yes	3.42587	5.82103	2.39516	1.25828e-07	Up
442	chr11:97850237-97850308	n-Tc54|chr11_1432_tRNACys_GCA-	yes	4.98331	6.19044	1.20714	0.000404368	Up
451	chr11:115274295-115274367	n-Tr14|chr11_1022_tRNAArg_CCT+	yes	4.90424	6.28529	1.38105	0.000102031	Up
452	chr11:115274618-115274690	n-Tr12|chr11_1234_tRNAArg_CCT-	yes	4.1148	5.42237	1.30757	0.000129428	Up
453	chr11:115275093-115275165	n-Tr18|chr11_1023_tRNAArg_TCG+	yes	4.77264	6.4715	1.69886	5.52409e-06	Up
459	chr12:53704775-53704881	Rnu6|U6-	yes	3.78832	6.01846	2.23014	1.18326e-07	Up
460	chr12:53705477-53705578	Rnu6|U6-	yes	3.23988	6.11441	2.87453	2.58096e-09	Up
464	chr12:72070107-72070179	n-Tk17|chr12_790_tRNALys_CTT-	yes	4.56791	6.77006	2.20215	1.27491e-07	Up
467	chr12:112083548-112083621	n-Ti6|chr12_470_tRNAIle_AAT+	yes	4.63572	5.81233	1.1766	0.000529081	Up
472	chr13:21259473-21259545	n-Tm14|chr13_61_tRNAMet_CAT+	yes	3.56557	6.35644	2.79087	3.76687e-09	Up
478	chr13:21264706-21264811	n-Tl9|chr13_998_tRNALeu_CAA_I-	yes	3.62054	6.02583	2.40529	3.28424e-08	Up
480	chr13:21307327-21307399	n-Tr9|chr13_997_tRNAArg_CCG-	yes	4.17202	5.23347	1.06145	0.00167209	Up
483	chr13:21332814-21332885	n-Ta40|chr13_68_tRNAAla_TGC+	yes	2.7784	5.87521	3.09681	2.10841e-09	Up
485	chr13:21341063-21341136	n-Tt3|chr13_996_tRNAThr_AGT-	yes	1.44115	2.44911	1.00796	0.0022001	Up
490	chr13:21367825-21367898	n-Tt18|chr13_73_tRNAThr_TGT+	yes	1.1814	3.45985	2.27844	1.2895e-07	Up
491	chr13:21371565-21371637	n-Tr16|chr13_74_tRNAArg_TCG+	yes	2.34525	6.23795	3.89269	5.3373e-11	Up
492	chr13:21414682-21414755	n-Tt13|chr13_75_tRNAThr_CGT+	yes	2.02949	4.56578	2.5363	2.09409e-08	Up
499	chr13:21947189-21947262	n-Ti11|chr13_990_tRNAIle_AAT-	yes	4.50756	5.69785	1.19029	0.000537191	Up
500	chr13:21947890-21947963	n-Tt4|chr13_81_tRNAThr_AGT+	yes	3.43483	6.21011	2.77527	5.05353e-09	Up
505	chr13:21999809-21999881	n-Tk23|chr13_83_tRNALys_TTT+	yes	1.62697	3.85543	2.22846	9.05595e-07	Up
507	chr13:22006707-22006812	n-Tl11|chr13_85_tRNALeu_CAA_I+	yes	2.05301	6.41588	4.36288	2.56574e-11	Up
508	chr13:22009031-22009116	n-Tr23|chr13_985_tRNAArg_TCT_I-	yes	1.66152	5.58017	3.91865	5.3373e-11	Up
509	chr13:22011084-22011165	n-Ts5|chr13_86_tRNASer_AGA+	yes	3.96955	4.97586	1.00631	0.00380317	Up
512	chr13:22019726-22019807	n-Ts6|chr13_88_tRNASer_AGA+	yes	1.08328	2.39133	1.30806	0.000280254	Up
514	chr13:22025830-22025901	n-Tq8|chr13_982_tRNAGln_CTG-	yes	1.72507	4.18629	2.46122	5.53151e-08	Up
516	chr13:22028963-22029044	n-Ts10|chr13_980_tRNASer_AGA-	yes	3.37338	5.42318	2.0498	8.16163e-07	Up
518	chr13:22032783-22032864	n-Ts8|chr13_978_tRNASer_AGA-	yes	3.75916	6.11389	2.35474	9.50725e-08	Up
527	chr13:22121092-22121165	n-Ti7|chr13_92_tRNAIle_AAT+	yes	4.66502	5.77382	1.10881	0.000871064	Up
539	chr13:23488929-23489002	n-Ti3|chr13_100_tRNAIle_AAT+	yes	1.28485	3.32321	2.03836	1.15734e-06	Up
543	chr13:23504810-23504882	n-Ta7|chr13_963_tRNAAla_AGC-	yes	1.75753	3.09103	1.3335	0.00101897	Up
544	chr13:23505117-23505189	n-Tv5|chr13_962_tRNAVal_AAC-	yes	1.47535	3.34213	1.86679	4.66453e-06	Up
545	chr13:23517515-23517603	n-Ty3|chr13_961_tRNATyr_GTA_I-	yes	3.11337	5.23517	2.1218	5.24694e-07	Up
546	chr13:23518374-23518461	n-Ty4|chr13_101_tRNATyr_GTA_I+	yes	2.9012	5.81556	2.91436	1.66158e-09	Up
552	chr13:23528863-23528934	n-Tp3|chr13_957_tRNAPro_AGG-	yes	3.94582	5.94546	1.99964	8.28825e-07	Up
557	chr13:23542491-23542564	n-Tt6|chr13_104_tRNAThr_AGT+	yes	4.82222	5.78499	0.96277	0.00371153	Up
559	chr13:23555404-23555475	n-Te15|chr13_105_tRNAGlu_TTC+	yes	3.97751	6.28819	2.31068	1.04697e-07	Up
560	chr13:23558945-23559034	n-Ty8|chr13_106_tRNATyr_GTA_I+	yes	4.1663	5.62578	1.45948	4.30947e-05	Up
561	chr13:23589975-23590046	n-Tw3|chr13_107_tRNATrp_CCA+	yes	2.52987	5.33184	2.80197	2.1406e-08	Up
562	chr13:23591949-23592020	n-Tm5|chr13_108_tRNAMetInit_CAT+	yes	1.87842	5.91752	4.0391	2.08842e-11	Up
563	chr13:23592391-23592463	n-Tr4|chr13_951_tRNAArg_ACG-	yes	1.13331	5.3073	4.17399	4.5068e-12	Up
564	chr13:23592826-23592907	n-Ts7|chr13_950_tRNASer_AGA-	yes	2.63718	6.08399	3.44681	1.25135e-10	Up
566	chr13:23598388-23598459	n-Tw4|chr13_109_tRNATrp_CCA+	yes	3.94192	5.50192	1.56	1.65783e-05	Up
571	chr13:23611482-23611553	n-Tq15|chr13_114_tRNAGln_TTG+	yes	4.34273	5.81368	1.47095	5.04578e-05	Up
580	chr14:51427123-51427447	Rpph1|RnasePRNA-	yes	2.72949	4.39049	1.661	8.87058e-06	Up
582	chr14:51684489-51684560	n-Tp4|chr14_705_tRNAPro_AGG-	yes	4.34957	6.03857	1.689	1.29544e-05	Up
583	chr14:51684843-51684915	n-Tt17|chr14_704_tRNAThr_TGT-	yes	4.31675	5.82236	1.50561	9.05298e-05	Up
584	chr14:51702505-51702586	n-Tl28|chr14_703_tRNALeu_TAG-	yes	3.55295	5.20678	1.65383	1.9495e-05	Up
587	chr14:51710322-51710393	n-Tp15|chr14_192_tRNAPro_TGG+	yes	4.09605	6.2928	2.19676	1.75671e-07	Up
588	chr14:55136533-55136605	n-Tr6|chr14_209_tRNAArg_ACG+	yes	5.30728	6.5861	1.27883	0.000235601	Up
594	chr14:76552581-76552652	n-Te16|chr14_347_tRNAGlu_TTC+	yes	4.46084	6.12066	1.65982	1.17783e-05	Up
595	chr14:79881475-79881546	n-Te14|chr14_359_tRNAGlu_TTC+	yes	3.95001	6.21817	2.26817	7.3973e-08	Up
615	chr16:13437416-13437487	n-Tt14|chr16_50_tRNAThr_CGT+	yes	4.31595	5.46423	1.14828	0.000531258	Up
631	chr17:23670929-23671001	n-Tk13|chr17_82_tRNALys_CTT+	yes	2.86609	5.35626	2.49016	2.88746e-08	Up
632	chr17:23672299-23672371	n-Tk12|chr17_1000_tRNALys_CTT-	yes	2.37645	5.06404	2.68759	9.89619e-09	Up
634	chr17:23677882-23677953	n-Tp10|chr17_83_tRNAPro_CGG+	yes	2.64649	5.32235	2.67586	1.80109e-07	Up
635	chr17:23683443-23683514	n-Tp16|chr17_996_tRNAPro_TGG-	yes	4.07909	5.9198	1.84071	4.29575e-06	Up
636	chr17:23684327-23684399	n-Tk14|chr17_84_tRNALys_CTT+	yes	3.91856	6.49239	2.57382	7.71018e-09	Up
637	chr17:23685735-23685807	n-Tr11|chr17_995_tRNAArg_CCT-	yes	4.51787	6.01338	1.49551	2.81006e-05	Up
638	chr17:23687230-23687302	n-Tr8|chr17_994_tRNAArg_CCG-	yes	3.87704	6.83011	2.95307	1.75253e-09	Up
641	chr17:26012033-26012103	n-Tg7|chr17_113_tRNAGly_CCC+	yes	4.52923	5.48067	0.951443	0.00341523	Up
649	chr17:84261284-84261376	n-Ti17|chr17_516_tRNAIle_TAT_I+	yes	4.09849	5.60198	1.50349	3.23884e-05	Up
651	chr18:36961520-36961662	Vaultrc5|Vault+	yes	4.59725	6.59248	1.99523	5.2073e-07	Up
656	chr19:3576263-3576335	n-Ta9|chr19_8_tRNAAla_AGC+	yes	4.31392	6.59727	2.28334	5.48716e-08	Up
659	chr19:5038304-5038385	n-Ts20|chr19_711_tRNASer_GCT-	yes	4.00943	6.14885	2.13942	1.46429e-07	Up
664	chr19:12080529-12080601	n-Tk29|chr19_107_tRNALys_TTT+	yes	4.46725	6.10946	1.64221	2.05106e-05	Up
665	chr19:12083035-12083107	n-Tf2|chr19_108_tRNAPhe_GAA+	yes	1.21231	5.22552	4.01321	3.14041e-11	Up
666	chr19:12084186-12084258	n-Tk30|chr19_639_tRNALys_TTT-	yes	4.58491	6.82313	2.23822	1.31996e-07	Up
667	chr19:12085576-12085658	n-Tl26|chr19_638_tRNALeu_TAA-	yes	4.32329	6.56948	2.2462	7.3973e-08	Up
668	chr19:12086078-12086163	n-Tr21|chr19_637_tRNAArg_TCT_I-	yes	4.41118	6.22524	1.81406	1.85341e-06	Up
669	chr19:12086421-12086493	n-Tv21|chr19_109_tRNAVal_TAC+	yes	4.90505	6.51941	1.61436	9.02799e-06	Up
670	chr19:12086756-12086828	n-Tv22|chr19_110_tRNAVal_TAC+	yes	3.3909	5.68614	2.29523	7.29759e-08	Up
681	chrX:100824407-100824506	B2_Mm2_B_SINE2+_and_PB1D10_Alu_SINE+	no	1.14218	3.86999	2.72781	5.21575e-09	Up
699	chrX:157204042-157204114	n-Tv23|chrX_459_tRNAVal_TAC+	yes	4.74227	5.83231	1.09004	0.00161975	Up

## Sheet: Higher in liver
	Locus description			Mean of scores in biological replicates		LIMMA analysis on POLR3D scores liver vs hepa
Number	Locus position with link (NCBI37/mm9)	Locus annotation	Discussed in Canella et al. 2012 ?	POLR3D Liver mean score (cut off = 1.0782)	POLR3D Hepa 1-6 mean score (cut off = 1.7317)	LogFC POLR3D Hepa 1-6 versus liver	adj.P.Val POLR3D Hepa 1-6 versus liver	POLR3D Up/Down in Hepa 1-6 versus liver
152	chr5:115002158-115002423	B2_Mm2_SINE_B2-	yes	3.27482	1.78794	-1.48687	3.63164e-05	Down
368	chr10:62866100-62866281	B3_SINE_B2+	yes	3.7101	1.86587	-1.84422	1.1884e-06	Down

## Sheet: Higher in Liver but rearranged
	Locus description			Mean of scores in biological replicates		LIMMA analysis on POLR3D scores liver vs hepa
Number	Locus position with link (NCBI37/mm9)	Locus annotation	Discussed in Canella et al. 2012 ?	POLR3D Liver mean score (cut off = 1.0782)	POLR3D Hepa 1-6 mean score (cut off = 1.7317)	LogFC POLR3D Hepa 1-6 versus liver	adj.P.Val POLR3D Hepa 1-6 versus liver	POLR3D Up/Down in Hepa 1-6 versus liver
244	chr6:128710725-128710819	Rn4.5s|4.5SRNA_scRNA-	yes	3.8886	2.44766	-1.44094	2.46124e-05	Down
247	chr6:128749420-128749559	Rn4.5s|4.5SRNA_scRNA-	yes	4.49826	2.37108	-2.12717	3.96922e-10	Down
248	chr6:128753032-128753126	Rn4.5s|4.5SRNA_scRNA-	yes	4.68793	2.34758	-2.34035	6.24569e-12	Down
403	chr11:58115976-58116082	n-Tl12|chr11_1911_tRNALeu_CAA_I-	yes	4.77676	3.81093	-0.965834	0.00270589	Down
474	chr13:21261556-21261628	n-Tm15|chr13_999_tRNAMet_CAT-	yes	4.94371	2.73433	-2.20938	1.11197e-07	Down
482	chr13:21325914-21325985	n-Ta17|chr13_67_tRNAAla_AGC+	yes	4.88281	3.49681	-1.386	6.23259e-05	Down
501	chr13:21973902-21973975	n-Ti10|chr13_989_tRNAIle_AAT-	yes	3.85789	2.78392	-1.07397	0.00131411	Down
523	chr13:22107660-22107732	n-Tv3|chr13_974_tRNAVal_AAC-	yes	4.14397	2.98775	-1.15622	0.000647655	Down
524	chr13:22113013-22113085	n-Tr1|chr13_973_tRNAArg_ACG-	yes	4.80933	3.61356	-1.19578	0.000506179	Down
549	chr13:23523281-23523353	n-Ta13|chr13_102_tRNAAla_AGC+	yes	5.7636	4.65886	-1.10475	0.00116478	Down
550	chr13:23524859-23524946	n-Ty7|chr13_958_tRNATyr_GTA_I-	yes	4.40451	1.94751	-2.457	5.01714e-08	Down
555	chr13:23538011-23538083	n-Tv17|chr13_954_tRNAVal_CAC-	yes	4.27681	2.63222	-1.6446	6.55443e-06	Down
573	chr13:23618325-23618397	n-Tr15|chr13_948_tRNAArg_TCG-	yes	4.39736	3.36869	-1.02867	0.00269665	Down
663	chr19:12076726-12076798	n-Tf6|chr19_106_tRNAPhe_GAA+	yes	4.58865	2.33966	-2.24899	1.2895e-07	Down

## Sheet: Only in Hepa 1-6
	Locus description			Mean of scores in biological replicates		LIMMA analysis on POLR3D scores liver vs hepa
Number	Locus position with link (NCBI37/mm9)	Locus annotation	Discussed in Canella et al. 2012 ?	POLR3D Liver mean score (cut off = 1.0782)	POLR3D Hepa 1-6 mean score (cut off = 1.7317)	LogFC POLR3D Hepa 1-6 versus liver	adj.P.Val POLR3D Hepa 1-6 versus liver	POLR3D Up/Down in Hepa 1-6 versus liver
14	chr1:172930087-172930186	B2_Mm2_SINE-	no	0.352944	2.43742	2.08447	1.81023e-07	Up
23	chr1:172996115-172996197	n-Tl18|chr1_701_tRNALeu_CAG+	yes	0.264594	3.00258	2.73798	3.47523e-09	Up
27	chr1:173003124-173003195	n-Td7|chr1_997_tRNAAsp_GTC-	yes	1.04816	2.46527	1.41711	6.44261e-05	Up
28	chr1:173003750-173003832	n-Tl19|chr1_703_tRNALeu_CAG+	yes	0.277619	2.79649	2.51887	2.61317e-08	Up
32	chr1:173010738-173010809	n-Td6|chr1_994_tRNAAsp_GTC-	yes	1.04816	2.46527	1.41711	6.44261e-05	Up
33	chr1:173011364-173011446	n-Tl20|chr1_705_tRNALeu_CAG+	yes	0.337375	2.70098	2.3636	5.64174e-08	Up
42	chr1:175320460-175320533	n-Tr20|chr1_730_tRNAArg_TCT+	yes	-0.423425	4.45065	4.87408	4.70308e-13	Up
52	chr2:78964614-78964713	B2_Mm1t_B2_SINE+	no	0.556214	5.16617	4.60995	1.70861e-12	Up
53	chr2:80479746-80479845	B1_Mus1_Alu_SINE+	no	0.404371	3.13413	2.72976	2.73884e-09	Up
56	chr2:118819929-118820028	B3A_B2_SINE-	no	0.0325527	3.93145	3.8989	2.08842e-11	Up
79	chr3:58506340-58506439	B2_Mm2-B2_SINE-	no	0.198224	3.7009	3.50267	6.18363e-11	Up
114	chr3:121992390-121992489	B2_Mm1t_B2_SINE-	no	0.502333	2.60298	2.10065	4.6667e-07	Up
125	chr4:40161169-40161268	B2_Mm1t_B2_SINE+	no	0.68888	2.79627	2.10739	3.85442e-07	Up
127	chr4:82265527-82265598	n-Th10|chr4_1697_tRNAHis_GTG-	yes	0.05825	2.13735	2.0791	3.62666e-07	Up
133	chr4:132071923-132071994	n-Ta8|chr4_645_tRNAAla_AGC+	yes	0.100578	1.8271	1.72652	8.90731e-06	Up
147	chr5:92781746-92781845	B2_Mm1a_B2_SINE-_and_RLTR13D2_ERVK_LTR-	no	0.626006	4.21708	3.59108	5.3373e-11	Up
158	chr5:134651370-134651469	PB1D7_alu_SINE-	no	-0.318656	2.79198	3.11063	4.17744e-10	Up
161	chr5:140252062-140252161	B2_Mus1_Alu_SINE+	no	0.820517	2.89109	2.07058	3.12134e-07	Up
167	chr6:30297452-30297551	Rn5S|5S_rRNA-	no	0.233611	3.24651	3.0129	6.59318e-10	Up
168	chr6:35127220-35127319	B1_Mm_Alu_SINE-	no	0.27064	2.42098	2.15034	1.79583e-07	Up
199	chr6:48114100-48114171	n-Tc40|chr6_166_tRNACys_GCA+	yes	0.00236143	2.23911	2.23675	1.73072e-07	Up
252	chr6:128796113-128796212	B2_Mm1a_B2_SINE-	no	0.577216	2.77897	2.20176	1.04697e-07	Up
282	chr8:86809783-86809882	B3_B2_SINE+_and_B1_Mm_Alu_SINE+	no	0.622338	3.23327	2.61093	1.07364e-08	Up
286	chr8:113154453-113154523	n-Tg16|chr8_887_tRNAGly_GCC-	yes	0.481847	1.90445	1.4226	6.89183e-05	Up
292	chr8:126064393-126064511	Rn5S|5S_rRNA	yes	0.482093	3.70533	3.22324	3.18043e-10	Up
304	chr8:126086495-126086613	Rn5S|5S_rRNA	yes	0.568762	2.72748	2.15872	1.73589e-07	Up
305	chr8:126088186-126088304	Rn5S|5S_rRNA	yes	0.907785	2.96486	2.05708	5.2073e-07	Up
309	chr8:126094901-126095019	Rn5S|5S_rRNA	yes	0.568762	2.72748	2.15872	1.73589e-07	Up
317	chr8:126108435-126108553	Rn5S|5S_rRNA	yes	0.666496	2.72748	2.06098	3.53889e-07	Up
319	chr8:126111859-126111977	Rn5S|5S_rRNA	yes	0.491516	3.72585	3.23434	3.11016e-10	Up
321	chr8:126115271-126115389	Rn5S|5S_rRNA	yes	0.493236	3.92826	3.43503	1.308e-10	Up
383	chr10:119656419-119656518	B2_Mm1a_B2_SINE+	no	0.284746	3.03744	2.75269	8.80765e-09	Up
398	chr11:48686457-48686556	B1_Mur1_Alu_SINE-	no	0.65177	2.70922	2.05745	5.59502e-07	Up
399	chr11:48689042-48689141	B2_Mm2_B2_SINE-_and_Lx7_L1_LINE-	no	0.78313	2.51078	1.72765	4.22244e-06	Up
426	chr11:69355229-69355328	B2_Mm2_B2_SINE+_and_B2_Mm1a_B2_SINE+	no	0.418649	2.89278	2.47413	2.61788e-08	Up
438	chr11:97652293-97652392	B2_Mm1a_B2_SINE+	no	0.853171	3.63162	2.77845	2.29634e-09	Up
445	chr11:101466556-101466655	B2_Mm1t_B2_SINE-_and_B2_Mm2_B2_SINE-	no	0.77407	3.33809	2.56402	2.21857e-08	Up
448	chr11:101859884-101859983	B2_Mm2_B2_SINE+	no	0.567339	3.93043	3.36309	2.75917e-10	Up
449	chr11:102995363-102995462	NA_22	no	-0.118242	4.74298	4.86122	9.06859e-13	Up
465	chr12:82631757-82631856	B2_Mm1t_B2_SINE+_and_MTD_MaLR_LTR-	no	0.0347225	3.80927	3.77455	2.09085e-11	Up
489	chr13:21360338-21360409	n-Tq13|chr13_995_tRNAGln_TTG-	yes	0.990769	2.12858	1.13781	0.000668969	Up
494	chr13:21584714-21584795	n-Ts16|chr13_992_tRNASer_GCT-	yes	-0.494985	1.8813	2.37628	5.53151e-08	Up
513	chr13:22023038-22023109	n-Tm10|chr13_983_tRNAMetInit_CAT-	yes	0.939591	3.62389	2.6843	1.19536e-08	Up
528	chr13:22121969-22122042	n-Tt1|chr13_971_tRNAThr_AGT-	yes	0.768783	3.49192	2.72314	8.6517e-09	Up
548	chr13:23520607-23520695	n-Ty6|chr13_959_tRNATyr_GTA_I-	yes	0.290853	2.08485	1.794	3.75824e-06	Up
576	chr13:58560282-58560381	B2_Mm1aB2_SINE-	no	0.165747	5.09484	4.9291	6.37695e-13	Up
579	chr14:51422741-51422840	B2_Mm2_B2_SINE+	no	0.510061	3.0495	2.53944	1.57932e-08	Up
606	chr15:81295628-81295727	B1_Mus1_Alu_SINE+	no	0.349699	2.61704	2.26734	6.6015e-08	Up
609	chr15:99697526-99697625	B3A_B2_SINE+	no	0.107844	2.2391	2.13126	2.11921e-07	Up
618	chr16:18058411-18058510	B1_Mm_Alu_SINE-	no	0.401387	2.5452	2.14382	1.41445e-07	Up
619	chr16:30394020-30394119	B2_Mm2_B2_SINE-	no	0.486848	3.7861	3.29925	3.87014e-10	Up
620	chr16:31205978-31206077	B2_Mm1t_B2_SINE+	no	0.196457	2.80884	2.61238	1.28849e-08	Up
622	chr16:38275006-38275105	B2_Mm2_B2_SINE+	no	0.654688	3.65136	2.99668	1.00378e-09	Up
623	chr16:43806665-43806764	NA_32	no	0.04109	2.54171	2.50062	2.95785e-08	Up
633	chr17:23675733-23675804	n-Tp11|chr17_998_tRNAPro_TGG-	yes	0.233606	2.48823	2.25462	9.93269e-08	Up
639	chr17:24832079-24832178	B1_Mus1_Alu_SINE-	no	0.705899	2.14312	1.43722	4.88345e-05	Up
640	chr17:24863030-24863129	B2_Mm2_B2_SINE-_and_B1_Mur4_Alu_SINE+	no	0.293254	2.32777	2.03452	1.13587e-06	Up
647	chr17:71146704-71146803	B2_Mm2_B2_SINE-	no	0.661437	3.82471	3.16327	3.96851e-10	Up
650	chr18:20251213-20251312	B3A_B2_SINE+	no	0.052963	3.08885	3.03589	4.84228e-10	Up
660	chr19:5786771-5786870	B2_Mm2_B2_SINE-	no	0.576586	2.13816	1.56158	1.91657e-05	Up
661	chr19:7570905-7571004	B2_Mm1a_B2_SINE-	no	0.383015	3.50999	3.12697	5.70774e-10	Up
662	chr19:7573070-7573169	NA_34	no	0.118859	2.51922	2.40037	3.90039e-08	Up
672	chr19:30019652-30019751	B2_Mm1a_B2_SINE+	no	1.01806	4.03205	3.01399	8.25723e-10	Up

## Sheet: Only in liver
	Locus description			Mean of scores in biological replicates		LIMMA analysis on POLR3D scores liver vs hepa
Number	Locus position with link (NCBI37/mm9)	Locus annotation	Discussed in Canella et al. 2012 ?	POLR3D Liver mean score (cut off = 1.0782)	POLR3D Hepa 1-6 mean score (cut off = 1.7317)	LogFC POLR3D Hepa 1-6 versus liver	adj.P.Val POLR3D Hepa 1-6 versus liver	POLR3D Up/Down in Hepa 1-6 versus liver
7	chr1:120246867-120247052	B2_Mm2_SINE_B2+	yes	1.96772	-0.221098	-2.18882	9.45655e-08	Down
63	chr2:154878649-154878748	B1F2_Alu_SINE-	no	1.27602	-0.110195	-1.38621	6.83031e-05	Down
64	chr2:164681329-164681428	B2_Mm2_B2_SINE+	no	2.58883	0.131313	-2.45751	1.3924e-08	Down
65	chr2:173043603-173043702	B1_Mus2_Alu_SINE+	no	1.73897	-0.0560104	-1.79498	1.53321e-06	Down
75	chr3:27052969-27053068	NA_4	no	2.40538	0.0155213	-2.38986	6.38547e-08	Down
83	chr3:94499511-94499610	B1_Mus2_Alu_SINE-	no	1.74539	-0.311318	-2.05671	6.98412e-07	Down
84	chr3:94739234-94739333	B2_Mm2_B2_SINE-_and_ID_ID_SINE-	no	1.52545	-0.421111	-1.94656	1.27996e-06	Down
96	chr3:96206141-96206214	n-Tn10|chr3_289_tRNAAsn_GTT+	yes	1.8706	0.0846554	-1.78594	1.86761e-06	Down
97	chr3:96213992-96214063	n-Th6|chr3_291_tRNAHis_GTG+	yes	2.52199	0.0864122	-2.43558	4.6978e-08	Down
101	chr3:96255348-96255421	n-Tn11|chr3_294_tRNAAsn_GTT+	yes	2.59996	-0.30036	-2.90032	2.55892e-09	Down
102	chr3:96256418-96256489	n-Th7|chr3_295_tRNAHis_GTG+	yes	2.17107	-0.30448	-2.47555	9.39463e-08	Down
103	chr3:96261993-96262064	n-Th9|chr3_751_tRNAHis_GTG-	yes	2.01386	-0.269363	-2.28322	2.11921e-07	Down
104	chr3:96263061-96263134	n-Tn13|chr3_750_tRNAAsn_GTT-	yes	2.51587	-0.256481	-2.77235	6.83194e-09	Down
128	chr4:97438963-97439062	NA_5	no	1.99799	-0.0786694	-2.07666	4.03847e-07	Down
129	chr4:117949245-117949344	NA_6	no	1.3641	-0.666527	-2.03063	2.22692e-07	Down
132	chr4:131972358-131972457	B2_Mm1t_B2_SINE+	no	1.62476	0.247202	-1.37756	0.000153851	Down
138	chr4:141510536-141510635	B4_B4_SINE-	no	1.33319	-0.0393413	-1.37253	8.12461e-05	Down
141	chr5:30439143-30439242	B2_Mm2_B2_SINE-	no	2.65498	-0.148373	-2.80336	1.20482e-09	Down
145	chr5:54383776-54383875	B2_Mm2_B2_SINE-	no	1.36045	-0.689567	-2.05002	2.42778e-07	Down
148	chr5:93139643-93139742	B2_Mm2_B2_SINE-	no	2.40659	-0.393092	-2.79968	1.13766e-09	Down
159	chr5:135372305-135372576	B3_SINE_B2-	yes	1.48785	0.225921	-1.26193	0.000256421	Down
164	chr6:5446594-5446693	NA_8	no	1.55165	-0.601378	-2.15302	1.52464e-07	Down
169	chr6:38287916-38288126	B2_Mm2_SINE_B2-	yes	2.89598	-0.111871	-3.00785	1.20482e-09	Down
254	chr6:149096989-149097088	B2_Mm1t_B2_SINE-	no	1.54894	0.553344	-0.995595	0.00361136	Down
256	chr7:26052529-26052628	NA_13	no	1.38517	-1.37914	-2.76431	1.47522e-09	Down
257	chr7:28259631-28259730	NA_14	no	1.66929	-0.286954	-1.95624	7.06768e-07	Down
261	chr7:52740591-52740766	B2_Mm2_SINE_B2+	yes	1.6898	-0.0238811	-1.71368	7.12043e-06	Down
262	chr7:54241133-54241232	B2_Mm2_B2_SINE-	no	1.65052	0.507607	-1.14291	0.000586868	Down
263	chr7:59763599-59763698	B3_B2_SINE+	no	1.99745	0.705047	-1.2924	0.000150207	Down
269	chr7:117336693-117336856	B1_Mus1_SINE_Alu-	yes	2.86092	0.0756062	-2.78531	1.67437e-09	Down
274	chr7:128147749-128147848	B2_Mm1t_B2_SINE+	no	1.72925	0.026681	-1.70257	4.99041e-06	Down
276	chr7:133824516-133824806	B1_Mus1_SINE_Alu-	yes	2.89787	0.67789	-2.21998	1.26109e-07	Down
277	chr7:133920329-133920428	NA_15	no	1.59466	-0.580135	-2.1748	7.9585e-08	Down
280	chr8:73222611-73222710	NA_16	no	2.6923	0.263348	-2.42895	3.90909e-08	Down
343	chr9:46080760-46081111	B2_Mm1a_SINE_B2-	yes	1.75798	0.780874	-0.977111	0.00288744	Down
356	chr9:107551368-107551823	B2_Mm2_SINE_B2-	yes	2.16429	0.189463	-1.97482	7.06768e-07	Down
362	chr10:19798427-19798526	B2_Mm1t_B2_SINE+	no	1.90587	-0.184579	-2.09044	2.10019e-07	Down
370	chr10:70786302-70786504	B2_Mm1a_SINE_B2-	yes	2.2409	-0.95582	-3.19672	2.86146e-10	Down
371	chr10:74967299-74967451	B3_SINE_B2+	yes	2.85045	0.300732	-2.54972	1.00358e-08	Down
384	chr10:126508214-126508433	B3_SINE_B2-	yes	2.53915	0.0126003	-2.52655	7.11536e-09	Down
385	chr10:126597026-126597125	B1_Mus1_Alu_SINE-	no	1.7519	0.285124	-1.46678	2.79347e-05	Down
386	chr10:127071228-127071327	B1_Mus2_Alu_SINE-	no	1.4336	-0.225863	-1.65946	5.06418e-06	Down
429	chr11:75237773-75237872	B1_Mur4_Alu_SINE+	no	1.26194	0.0216413	-1.2403	0.000239307	Down
430	chr11:75257391-75257490	NA_17	no	1.31051	-0.659015	-1.96953	4.02538e-07	Down
434	chr11:94023628-94023727	NA_19	no	1.44178	-0.69369	-2.13547	9.83162e-08	Down
456	chr12:12817037-12817136	NA_23	no	1.36252	-1.36968	-2.7322	3.76687e-09	Down
457	chr12:32635403-32635502	NA_24	no	1.21496	-0.725458	-1.94042	7.06768e-07	Down
466	chr12:86493988-86494179	B3A_SINE_B2-	yes	2.62482	1.54959	-1.07523	0.00265165	Down
575	chr13:25022629-25022811	B2_Mm1t_SINE_B2+	yes	2.23962	0.627009	-1.61261	1.34643e-05	Down
577	chr13:94385175-94385274	B2_Mm2_B2_SINE-	no	1.6323	0.391825	-1.24047	0.000586868	Down
578	chr14:49095552-49095651	NA_26	no	2.06717	-0.490492	-2.55766	6.83194e-09	Down
591	chr14:71113711-71113810	B1_Mus1_Alu_SINE+	no	1.79159	-0.313596	-2.10518	2.36094e-07	Down
593	chr14:74022510-74022609	B1_Mus2_Alu_SINE-	no	1.38278	0.200309	-1.18247	0.000370463	Down
596	chr14:118488747-118488819	n-Tf5|chr14_457_tRNAPhe_GAA-	yes	3.48013	-0.136955	-3.61708	5.3373e-11	Down
603	chr15:58818221-58818320	NA_28	no	1.36221	-0.634211	-1.99642	3.11917e-07	Down
604	chr15:58879494-58879593	NA_29	no	1.28461	-0.787309	-2.07192	1.69739e-07	Down
610	chr15:100213624-100213723	ID_B1_B4_SINE-_and_B1_Mur3_Alu_SINE+	no	1.64467	-0.303754	-1.94842	7.06768e-07	Down
613	chr16:10347819-10347918	NA_31	no	1.44922	0.0326732	-1.41655	6.13794e-05	Down
621	chr16:31399621-31399720	B2_Mm2_B2_SINE+	no	2.31235	0.651026	-1.66132	6.75435e-06	Down
629	chr16:84746464-84746699	B1_Mus1_SINE_Alu+	yes	3.19254	-0.196728	-3.38927	1.13635e-10	Down
630	chr16:91770236-91770335	B2_Mm1t_B2_SINE-	no	1.50324	-0.536583	-2.03983	2.38721e-07	Down
642	chr17:30794465-30794672	B3_SINE_B2-	yes	2.72867	1.47368	-1.25499	0.000224951	Down
645	chr17:56545262-56545361	B4_B4_SINE+	no	1.336	-0.427692	-1.7637	8.90731e-06	Down
658	chr19:4820900-4821061	B2_Mm1a_SINE_B2+	yes	3.08363	0.17576	-2.90787	8.25723e-10	Down
671	chr19:23195036-23195211	B1_Mus1_SINE_Alu+	yes	2.79585	0.857939	-1.93791	5.11562e-07	Down
674	chr19:38227174-38227273	B2_Mm2_B2_SINE+	no	1.9959	0.642073	-1.35382	7.74509e-05	Down

## Sheet: Only in liver but rearranged
	Locus description			Mean of scores in biological replicates		LIMMA analysis on POLR3D scores liver vs hepa
Number	Locus position with link (NCBI37/mm9)	Locus annotation	Discussed in Canella et al. 2012 ?	POLR3D Liver mean score (cut off = 1.0782)	POLR3D Hepa 1-6 mean score (cut off = 1.7317)	LogFC POLR3D Hepa 1-6 versus liver	adj.P.Val POLR3D Hepa 1-6 versus liver	POLR3D Up/Down in Hepa 1-6 versus liver
19	chr1:172975116-172975186	n-Tg12|chr1_699_tRNAGly_GCC+	yes	5.05313	0.674756	-4.37837	9.06859e-13	Down
43	chr1:180241842-180241941	B2_Mm2_B2_SINE-	no	1.77618	-0.00692189	-1.7831	3.82719e-06	Down
136	chr4:135550206-135550305	B1_Mus1_Alu_SINE+	no	1.76628	-0.822301	-2.58858	6.26935e-09	Down
139	chr4:148800836-148800935	NA_7	no	1.41979	-0.491044	-1.91083	9.57039e-07	Down
278	chr8:14842649-14843098	B2_Mm2_SINE_B2+	yes	2.9328	0.697424	-2.23538	8.6365e-08	Down
348	chr9:66003087-66003186	B2_Mm2_B2_SINE-	no	1.77169	-0.0716212	-1.84331	1.33058e-06	Down
473	chr13:21259944-21260016	n-Tk28|chr13_1000_tRNALys_TTT-	yes	4.4081	0	-4.4081	9.06859e-13	Down
486	chr13:21346089-21346160	n-Ta28|chr13_70_tRNAAla_CGC+	yes	1.9635	-0.113489	-2.07699	2.42778e-07	Down
487	chr13:21351637-21351708	n-Ta19|chr13_71_tRNAAla_AGC+	yes	3.19994	0	-3.19994	1.13706e-09	Down
488	chr13:21356449-21356522	n-Tt11|chr13_72_tRNAThr_CGT+	yes	2.0833	1.01348	-1.06983	0.00129824	Down
498	chr13:21939891-21939973	n-Tl24|chr13_991_tRNALeu_TAA-	yes	2.21232	0.022313	-2.19	6.66142e-08	Down
502	chr13:21974754-21974826	n-Tf1|chr13_988_tRNAPhe_GAA-	yes	3.87672	0	-3.87672	7.79044e-12	Down
520	chr13:22066901-22066972	n-Tm8|chr13_90_tRNAMetInit_CAT+	yes	5.44922	0.125433	-5.32379	3.45561e-13	Down
522	chr13:22088450-22088521	n-Tq1|chr13_975_tRNAGln_CTG-	yes	1.88423	0.587402	-1.29683	0.000128358	Down
531	chr13:23377270-23377342	n-Tv4|chr13_93_tRNAVal_AAC+	yes	2.59056	0.513762	-2.0768	1.87935e-07	Down
532	chr13:23377518-23377590	n-Ta10|chr13_94_tRNAAla_AGC+	yes	2.62147	0.666844	-1.95462	5.45211e-07	Down
533	chr13:23390650-23390722	n-Tv6|chr13_95_tRNAVal_AAC+	yes	2.32519	0.916284	-1.40891	0.000256528	Down
534	chr13:23390930-23391002	n-Ta11|chr13_96_tRNAAla_AGC+	yes	1.85702	0.0973834	-1.75963	7.37427e-06	Down
535	chr13:23391991-23392063	n-Tv12|chr13_97_tRNAVal_CAC+	yes	2.76692	-0.275094	-3.04201	1.75253e-09	Down
537	chr13:23400921-23400994	n-Ti9|chr13_968_tRNAIle_AAT-	yes	2.62774	0.308064	-2.31967	4.28278e-07	Down
538	chr13:23409335-23409407	n-Tm12|chr13_99_tRNAMet_CAT+	yes	1.65756	0.021248	-1.63631	5.3755e-05	Down
541	chr13:23492942-23493014	n-Tv2|chr13_965_tRNAVal_AAC-	yes	1.34921	0.362092	-0.987119	0.00274285	Down
556	chr13:23538661-23538733	n-Tr5|chr13_953_tRNAArg_ACG-	yes	4.25799	1.60845	-2.64954	6.83194e-09	Down
558	chr13:23545301-23545383	n-Tl22|chr13_952_tRNALeu_CAG-	yes	4.92857	1.52749	-3.40108	6.18363e-11	Down
616	chr16:14131871-14132075	B2_Mm1t_SINE_B2-	yes	2.03815	-0.76435	-2.8025	1.08185e-09	Down

## Sheet: not occupied
	Locus description			Mean of scores in biological replicates
Number	Locus position with link (NCBI37/mm9)	Locus annotation	Discussed in Canella et al. 2012 ?	POLR3D Liver mean score (cut off = 1.0782)	POLR3D Hepa 1-6 mean score (cut off = 1.7317)
5	chr1:78294370-78294441	n-Tp1|chr1_284_tRNAPro_AGG+	yes	-0.193181	0.219655
6	chr1:112801324-112801396	n-Tk7|chr1_1268_tRNALys_CTT-	yes	-0.269046	0.106782
11	chr1:155305794-155305866	n-Ti13|chr1_583_tRNAIle_TAT+	yes	0.0833012	0.669196
41	chr1:173599570-173599642	n-Th1|chr1_717_tRNAHis_ATG+	yes	-0.111281	-0.202524
44	chr1:183986139-183986220	n-Ts15|chr1_791_tRNASer_GCT+	yes	-0.189553	-0.548333
45	chr1:190765285-190765358	n-Tn3|chr1_814_tRNAAsn_GTT+	yes	-0.0748109	-0.426333
55	chr2:113929103-113929174	n-Td2|chr2_510_tRNAAsp_GTC+	yes	-0.296402	-0.685102
58	chr2:118881889-118881962	n-Ti12|chr2_1506_tRNAIle_GAT-	yes	-0.073938	-0.48771
67	chr3:3123740-3123812	n-Tk1|chr3_1_tRNALys_CTT+	yes	-0.205284	-0.0180556
68	chr3:3149493-3149565	n-Tk9|chr3_2_tRNALys_CTT+	yes	-0.274282	0.0508573
74	chr3:24061947-24062029	n-Tl13|chr3_1026_tRNALeu_CAG-	yes	-0.160711	0.0773885
80	chr3:59278848-59278919	n-Tv9|chr3_928_tRNAVal_CAC-	yes	0.183039	0.598065
85	chr3:96115177-96115247	n-Tg2|chr3_282_tRNAGly_CCC+	yes	0.0437829	-0.36486
86	chr3:96125997-96126070	n-Tn4|chr3_283_tRNAAsn_GTT+	yes	1.01814	1.13451
88	chr3:96138538-96138611	n-Tn5|chr3_757_tRNAAsn_GTT-	yes	0.199228	-0.250099
89	chr3:96138894-96138967	n-Tn1|chr3_285_tRNAAsn_GTT+	yes	0.457814	-0.992846
91	chr3:96150598-96150669	n-Te19|chr3_286_tRNAGlu_TTC+	yes	0.230067	-0.527526
93	chr3:96186834-96186904	n-Tg4|chr3_287_tRNAGly_CCC+	yes	1.01534	0.509626
94	chr3:96191328-96191399	n-Te20|chr3_754_tRNAGlu_TTC-	yes	0.187765	-0.647622
100	chr3:96239895-96239966	n-Th2|chr3_293_tRNAHis_GTG+	yes	0.558204	-0.437586
105	chr3:96267895-96267966	n-Th11|chr3_749_tRNAHis_GTG-	yes	-0.0684904	-0.225396
113	chr3:97485382-97485453	n-Tq2|chr3_309_tRNAGln_CTG+	yes	0.959673	0.46002
116	chr3:123602105-123602176	n-Te1|chr3_622_tRNAGlu_CTC-	yes	-0.0485768	-0.0138268
123	chr4:27831926-27831999	n-Ti2|chr4_62_tRNAIle_AAT+	yes	0.0781447	-0.573266
124	chr4:32317225-32317295	n-Tg3|chr4_67_tRNAGly_CCC+	yes	-0.198373	-0.456679
131	chr4:131681174-131681245	n-Ta22|chr4_626_tRNAAla_CGC+	yes	-0.0851618	-0.527369
134	chr4:132670411-132670481	n-Tg9|chr4_1314_tRNAGly_GCC-	yes	-0.0127197	-0.676499
137	chr4:138986421-138986492	n-Tv1|chr4_1183_tRNAVal_AAC-	yes	0.245485	-0.262552
140	chr5:5627681-5627751	n-Ts1|chr5_13_tRNASeC_TCA+	yes	0.0690274	-0.249543
149	chr5:98470109-98470181	n-Tk8|chr5_1627_tRNALys_CTT-	yes	-0.0845606	-0.347643
150	chr5:101421893-101421964	n-Td1|chr5_1609_tRNAAsp_GTC-	yes	-0.38807	-0.340424
162	chr5:144108745-144108871	n-Ts11|chr5_1135_tRNASer_AGA_I-	yes	-0.0946601	-0.480504
165	chr6:10050371-10050443	n-Tv13|chr6_10_tRNAVal_CAC+	yes	-0.00399562	-0.0469389
191	chr6:48083936-48084007	n-Tc37|chr6_161_tRNACys_GCA+	yes	-0.181275	0.92977
192	chr6:48089509-48089580	n-Tc10|chr6_1034_tRNACys_GCA-	yes	0.225168	0.170202
193	chr6:48090483-48090554	n-Tc4|chr6_1033_tRNACys_GCA-	yes	-0.426398	0.147442
194	chr6:48093355-48093426	n-Tc13|chr6_162_tRNACys_GCA+	yes	-0.128097	0.376053
195	chr6:48094927-48094998	n-Tc36|chr6_1032_tRNACys_GCA-	yes	-0.454856	0.101721
196	chr6:48104713-48104784	n-Tc38|chr6_163_tRNACys_GCA+	yes	-0.305332	1.5735
197	chr6:48106274-48106345	n-Tc35|chr6_1031_tRNACys_GCA-	yes	0.182472	-0.174344
198	chr6:48110178-48110249	n-Tc39|chr6_164_tRNACys_GCA+	yes	-0.213464	1.33335
200	chr6:48136317-48136388	n-Tc8|chr6_167_tRNACys_GCA+	yes	-0.250838	0.97042
201	chr6:48147025-48147096	n-Tc41|chr6_168_tRNACys_GCA+	yes	-0.222707	-0.510916
202	chr6:48155067-48155138	n-Tc1|chr6_170_tRNACys_GCA+	yes	0.318063	-0.0727378
203	chr6:48157450-48157521	n-Tc34|chr6_1030_tRNACys_GCA-	yes	-0.010762	0.767826
204	chr6:48159837-48159908	n-Tc49|chr6_1029_tRNACys_GCA-	yes	0.0223211	0.356998
205	chr6:48173093-48173164	n-Tc33|chr6_1027_tRNACys_GCA-	yes	-0.092154	0.781478
206	chr6:48174328-48174399	n-Tc48|chr6_1026_tRNACys_GCA-	yes	-0.0756724	0.246088
207	chr6:48194315-48194386	n-Tc32|chr6_1025_tRNACys_GCA-	yes	-0.16059	1.54888
208	chr6:48202102-48202173	n-Tc31|chr6_1024_tRNACys_GCA-	yes	0.0851161	-0.590753
209	chr6:48203079-48203150	n-Tc15|chr6_1023_tRNACys_GCA-	yes	-0.0685354	-0.795994
210	chr6:48211721-48211792	n-Tc30|chr6_1022_tRNACys_GCA-	yes	0.0536296	0.169946
211	chr6:48218457-48218528	n-Tc29|chr6_1021_tRNACys_GCA-	yes	0.0759907	0.370909
212	chr6:48221925-48221996	n-Tc42|chr6_171_tRNACys_GCA+	yes	0.0349697	0.0118514
213	chr6:48223679-48223750	n-Tc43|chr6_172_tRNACys_GCA+	yes	-0.345004	-0.336953
214	chr6:48228791-48228862	n-Tc3|chr6_1020_tRNACys_GCA-	yes	-0.127456	0.601711
215	chr6:48229770-48229841	n-Tc28|chr6_1019_tRNACys_GCA-	yes	-0.227306	0.0144148
216	chr6:48238875-48238946	n-Tc12|chr6_1018_tRNACys_GCA-	yes	-0.0294612	0.359504
217	chr6:48243006-48243077	n-Tc50|chr6_1017_tRNACys_GCA-	yes	-0.33807	0.636267
218	chr6:48247432-48247503	n-Tc44|chr6_173_tRNACys_GCA+	yes	-0.146897	-0.458189
219	chr6:48248949-48249020	n-Tc27|chr6_1016_tRNACys_GCA-	yes	-0.277442	-0.168243
220	chr6:48252458-48252529	n-Tc6|chr6_174_tRNACys_GCA+	yes	-0.0434928	-0.624275
221	chr6:48253464-48253535	n-Tc17|chr6_175_tRNACys_GCA+	yes	-0.181843	0.0877687
222	chr6:48255463-48255534	n-Tc7|chr6_1015_tRNACys_GCA-	yes	-0.0956506	-1.08771
223	chr6:48258728-48258799	n-Tc16|chr6_1014_tRNACys_GCA-	yes	-0.123132	-0.262915
224	chr6:48259706-48259777	n-Tc26|chr6_1013_tRNACys_GCA-	yes	-0.320379	0.412124
225	chr6:48261498-48261569	n-Tc9|chr6_176_tRNACys_GCA+	yes	-0.168035	-0.390463
226	chr6:48263017-48263088	n-Tc25|chr6_1012_tRNACys_GCA-	yes	-0.686531	0.333801
227	chr6:48266536-48266605	n-Tc2|chr6_177_tRNACys_GCA+	yes	-0.347425	-0.538493
228	chr6:48267514-48267585	n-Tc45|chr6_178_tRNACys_GCA+	yes	0.017813	0.00108105
229	chr6:48282839-48282910	n-Tc24|chr6_1011_tRNACys_GCA-	yes	-0.151055	0.753794
230	chr6:48286107-48286178	n-Tc23|chr6_1010_tRNACys_GCA-	yes	-0.207865	0.622499
231	chr6:48287090-48287161	n-Tc22|chr6_1009_tRNACys_GCA-	yes	-0.0151505	-0.532408
232	chr6:48290612-48290683	n-Tc14|chr6_179_tRNACys_GCA+	yes	0.0826907	-0.244366
233	chr6:48291587-48291658	n-Tc5|chr6_180_tRNACys_GCA+	yes	0.172708	0.322483
234	chr6:48299761-48299832	n-Tc21|chr6_1008_tRNACys_GCA-	yes	-0.19584	-0.0373006
235	chr6:48304018-48304089	n-Tc20|chr6_1006_tRNACys_GCA-	yes	-0.115991	0.00959151
236	chr6:48305854-48305925	n-Tc46|chr6_181_tRNACys_GCA+	yes	0.00523	-0.127006
237	chr6:48306850-48306921	n-Tc11|chr6_182_tRNACys_GCA+	yes	0.431141	0.369248
238	chr6:48313531-48313602	n-Tc19|chr6_1005_tRNACys_GCA-	yes	-0.308098	-0.247448
253	chr6:135217793-135217866	n-Tv20|chr6_651_tRNAVal_GAC-	yes	-0.204828	0.322367
268	chr7:106692410-106692481	n-Te3|chr7_967_tRNAGlu_CTC-	yes	-0.159719	0.10339
279	chr8:39276255-39276337	n-Tl14|chr8_168_tRNALeu_CAG+	yes	-0.245543	-0.089681
281	chr8:82433177-82433249	n-Tk20|chr8_317_tRNALys_TTT+	yes	0.0139531	-0.0760026
287	chr8:113155146-113155216	n-Tg15|chr8_886_tRNAGly_GCC-	yes	0.782525	1.31651
342	chr9:14762877-14762949	n-Tk4|chr9_1514_tRNALys_CTT-	yes	-0.0568749	-0.00456547
350	chr9:74956737-74956819	n-Ta4|chr9_1100_tRNAAla_AGC-	yes	-0.0771719	-0.191301
353	chr9:104302450-104302521	n-Tc47|chr9_592_tRNACys_GCA+	yes	-0.0458882	1.53604
354	chr9:104306386-104306457	n-Tc53|chr9_593_tRNACys_GCA+	yes	-0.0276391	0.929019
355	chr9:104310997-104311068	n-Te18|chr9_961_tRNAGlu_TTC-	yes	0.860224	-0.119227
363	chr10:23496889-23496960	n-Tw1|chr10_1282_tRNATrp_CCA-	yes	0.274401	-0.0129025
365	chr10:61853872-61853944	n-Ta6|chr10_1120_tRNAAla_AGC-	yes	0.0321676	-0.354215
367	chr10:62656988-62657080	n-Tm18|chr10_1101_tRNAMet_CAT_I-	yes	0.119185	-0.577815
372	chr10:77846390-77846462	n-Ta5|chr10_979_tRNAAla_AGC-	yes	0.164326	-0.0585057
379	chr10:87292631-87292703	n-Tk21|chr10_885_tRNALys_TTT-	yes	-0.0775869	0.933725
388	chr11:7769780-7769851	n-Td10|chr11_69_tRNAAsp_GTC+	yes	0.173267	-0.672584
401	chr11:51790041-51790112	n-Ta1|chr11_238_tRNAAla_AGC+	yes	-0.27431	-0.403704
406	chr11:67104641-67104712	n-Tp12|chr11_372_tRNAPro_TGG+	yes	0.161324	0.242436
427	chr11:73950817-73950889	n-Tk5|chr11_1752_tRNALys_CTT-	yes	-0.12299	-0.372354
432	chr11:86075670-86075741	n-Tq12|chr11_630_tRNAGln_TTG+	yes	-0.0880793	-0.149242
444	chr11:100399472-100399544	n-Ts23|chr11_832_tRNASer_GGA+	yes	0.032507	0.218336
454	chr11:116277293-116277365	n-Ta3|chr11_1203_tRNAAla_AGC-	yes	0.328125	-0.732381
455	chr11:121825376-121825448	n-Tm1|chr11_1132_tRNAMet_CAT-	yes	0.148164	-0.33409
458	chr12:43516062-43516133	n-Te2|chr12_886_tRNAGlu_CTC-	yes	0.0279802	0.189678
468	chr13:4223394-4223466	n-Tk6|chr13_1041_tRNALys_CTT-	yes	-0.152186	-0.593673
497	chr13:21887668-21887750	n-Tsta1|chr13_79_tRNASup_TTA+	yes	0.104317	0.868455
503	chr13:21988807-21988900	n-Ti14|chr13_987_tRNAIle_TAT_I-	yes	0.758229	1.32059
530	chr13:23362290-23362385	n-Ti15|chr13_969_tRNAIle_TAT_I-	yes	0.422738	-0.066424
542	chr13:23503946-23504018	n-Tv10|chr13_964_tRNAVal_CAC-	yes	0.274645	0.374627
590	chr14:59436990-59437063	n-Tt2|chr14_628_tRNAThr_AGT-	yes	0.150471	-0.140166
597	chr15:16205705-16205778	n-Tn2|chr15_1013_tRNAAsn_GTT-	yes	0.0265754	-0.253158
605	chr15:69227053-69227124	n-Tm3|chr15_876_tRNAMet_CAT-	yes	0.0375929	-0.464316
607	chr15:88471962-88472034	n-Tm4|chr15_355_tRNAMet_CAT+	yes	0.106325	-0.0217313
611	chr16:3012009-3012080	n-Tl2|chr16_829_tRNALeu_AAG-	yes	0.00592882	0.536164
612	chr16:3449838-3449909	n-Tl1|chr16_4_tRNALeu_AAG+	yes	-0.0456339	0.540707
617	chr16:16854357-16854429	n-Tk3|chr16_76_tRNALys_CTT+	yes	-0.12081	0.168489
625	chr16:47250659-47250731	n-Tk2|chr16_267_tRNALys_CTT+	yes	0.0408316	0.189528
627	chr16:75434424-75434497	n-Ti1|chr16_315_tRNAIle_AAT+	yes	0.105098	-0.0572005
644	chr17:56231424-56231495	n-Te4|chr17_720_tRNAGlu_CTC-	yes	0.177513	-0.530341
646	chr17:59208131-59208203	n-Tv11|chr17_392_tRNAVal_CAC+	yes	0.0534119	0.786592
652	chr18:46446083-46446154	n-Tt10|chr18_633_tRNAThr_CGT-	yes	0.0134391	-0.104472
655	chr19:3066556-3066627	n-Tl3|chr19_2_tRNALeu_AAG+	yes	0.0050456	0.403235
676	chrX:13436292-13436363	n-Tq11|chrX_936_tRNAGln_TTG-	yes	-0.00544337	0.191912
677	chrX:14279742-14279813	n-Tp13|chrX_931_tRNAPro_TGG-	yes	-0.18541	-0.0444392
680	chrX:53840716-53840788	n-Ta2|chrX_159_tRNAAla_AGC+	yes	-0.121716	-0.388174
682	chrX:108490826-108490898	n-Tr13|chrX_321_tRNAArg_CCT+	yes	0.404795	0.650744
684	chrX:132730271-132730343	n-Tk19|chrX_643_tRNALys_CTT-	yes	0.291734	0.949458
685	chrX:132892141-132892212	n-Ta31|chrX_363_tRNAAla_TGC+	yes	-0.0181681	0
686	chrX:132902260-132902331	n-Ta23|chrX_364_tRNAAla_CGC+	yes	0.116783	0.115946
687	chrX:132913905-132913976	n-Ta26|chrX_640_tRNAAla_CGC-	yes	-0.00323464	0.0854527
688	chrX:132915286-132915357	n-Ta35|chrX_366_tRNAAla_TGC+	yes	-0.15368	0
689	chrX:132930061-132930132	n-Ta25|chrX_639_tRNAAla_CGC-	yes	-0.00323464	0.0854527
690	chrX:132931443-132931514	n-Ta36|chrX_368_tRNAAla_TGC+	yes	-0.00839837	0
691	chrX:132936407-132936478	n-Ta24|chrX_369_tRNAAla_CGC+	yes	0.189537	0
692	chrX:132964904-132964975	n-Ta33|chrX_637_tRNAAla_TGC-	yes	0.165417	0.401062
693	chrX:133088264-133088335	n-Ta32|chrX_371_tRNAAla_TGC+	yes	0.113399	0.34573
694	chrX:133102404-133102475	n-Ta21|chrX_636_tRNAAla_CGC-	yes	-0.196404	0.583277
695	chrX:133103785-133103856	n-Ta37|chrX_372_tRNAAla_TGC+	yes	0.161453	-0.0800993
696	chrX:133104302-133104374	n-Ta20|chrX_373_tRNAAla_CGC+	yes	0.068225	0.20587
697	chrX:133124904-133124975	n-Ta30|chrX_375_tRNAAla_TGC+	yes	-0.174442	0.46816
700	chrX:157573066-157573148	n-Tl23|chrX_462_tRNALeu_TAA+	yes	0.112494	0.403956
701	chrX:163347665-163347746	n-Ts3|chrX_493_tRNASer_AGA-	yes	-0.359491	-0.178482
